# Supplementary material for: Clinical Implications of Sub-grouping HER2 Positive Tumors by Amplicon Structure and Co-amplified Genes
Source: PubMed Central journal article supplement (PMC6906288; doi:10.1038/s41598-019-55455-6), 2019-12-11
Supplement: 41598_2019_55455_MOESM1_ESM.pdf [file 41598_2019_55455_MOESM1_ESM.pdf]

## **Clinical Implications of Sub-grouping HER2 Positive Tumors by Amplicon Structure and Co-amplified Genes**

Myriam Maoz, Michal Devir, Michal Inbar, Ziva Inbar-Daniel, Dana Sherill-Rofe, Idit Bloch, Karen Meir, David Edelman, Salah Azzam, Hovav Nechushtan, Ofra Maimon, Beatrice Uziely, Luna Kaduri, Amir Sonnenblick, Amir Eden, Tamar Peretz, Aviad Zick.

## List of samples in order of appearance:

|      |       |        |          |
|------|-------|--------|----------|
| p-2  | p-25  | p-119  | 80990    |
| p-3  | p-27  | 166    | BT474    |
| p-5  | p-28  | p-203  | HCC1954  |
| p-6  | p-29  | p-204  | MCF7     |
| p-8  | p-30  | p-205  | MDA361   |
| m-11 | p-33  | p-209  | SKBR3    |
| m-12 | p-102 | p-214  | ZR-75-30 |
| m-13 | p-103 | p-215  |          |
| p-16 | p-104 | p-216  |          |
| p-17 | p-106 | p-217  |          |
| p-20 | p-108 | p-218  |          |
| p-21 | p-112 | p-6890 |          |
| p-22 | p-114 | p-8191 |          |
| p-23 | p-115 | 20983  |          |

p-2

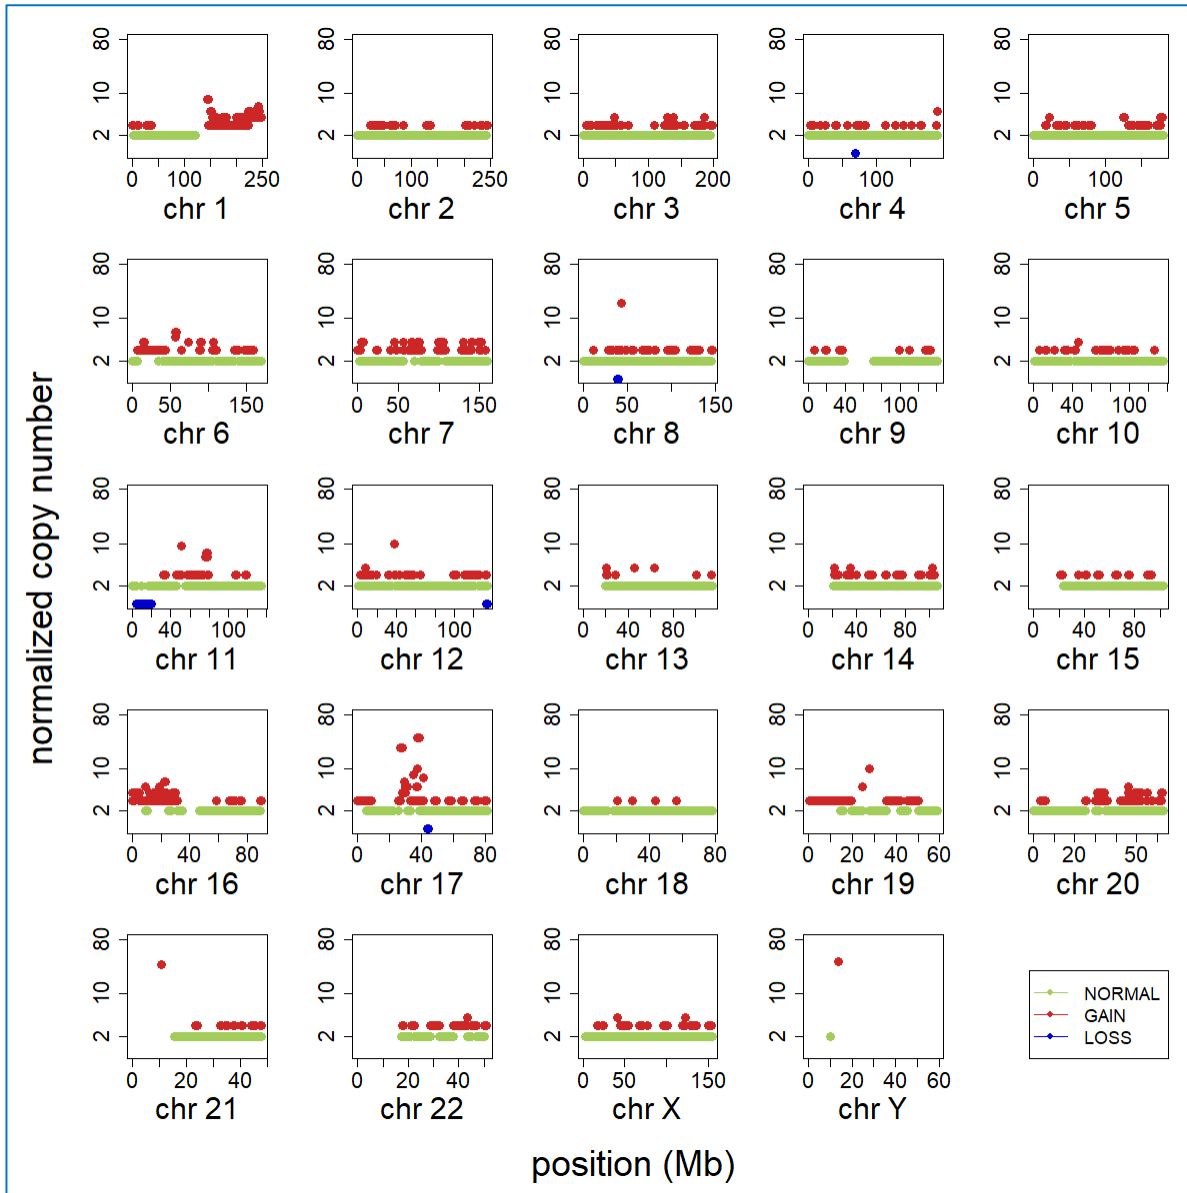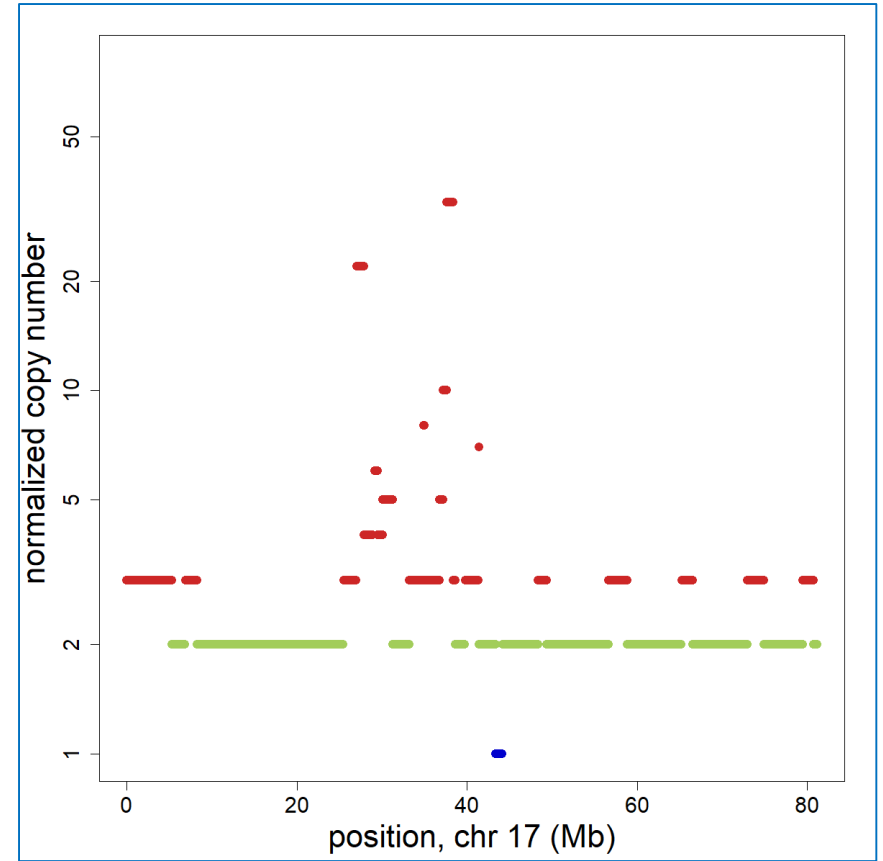

Control-FREEC

p-2

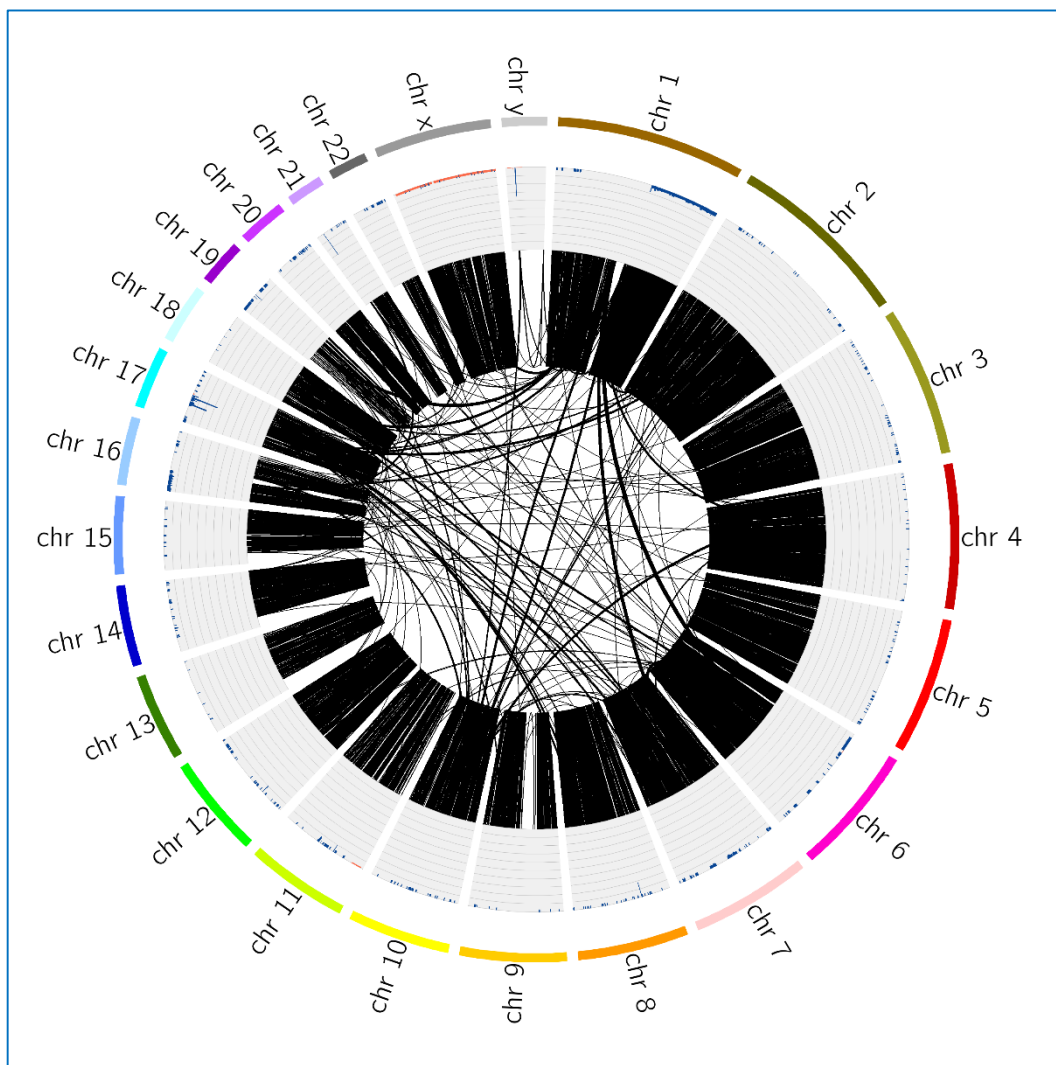

BreakDancer + Control-FREEC

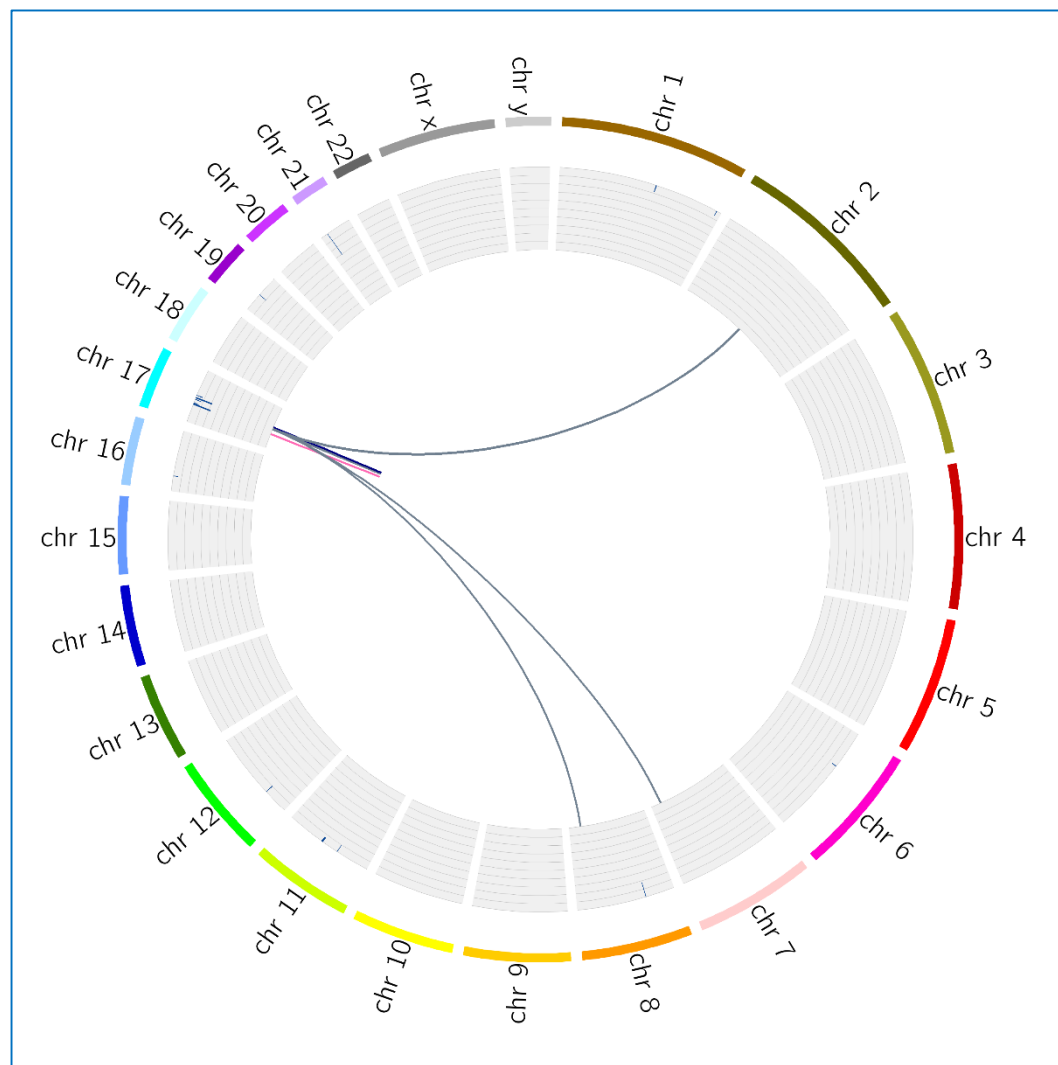

FAST - Whole Genome

p-2

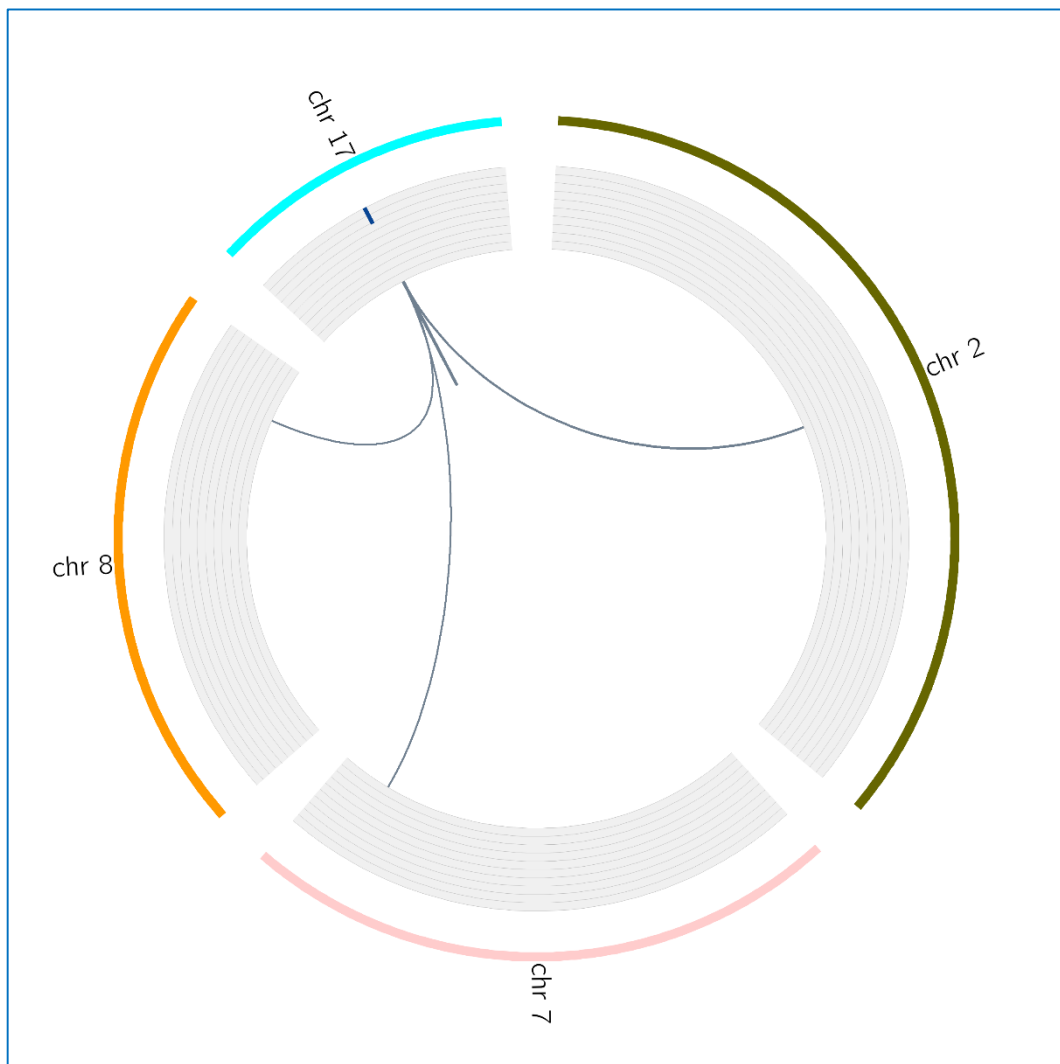

FAST – ERBB2 amplicon

p-3

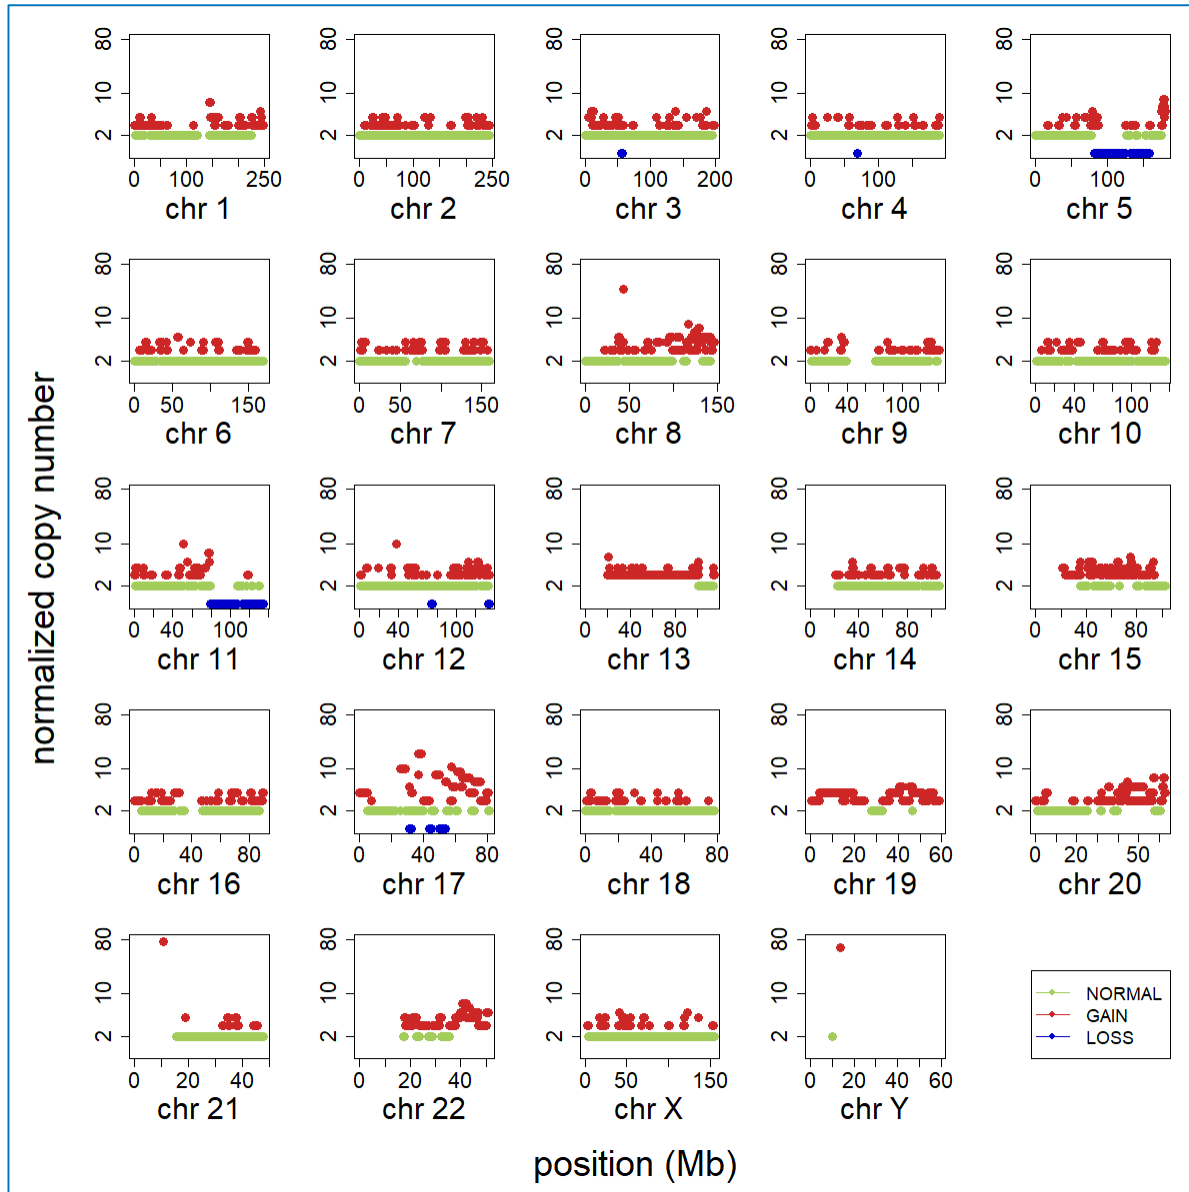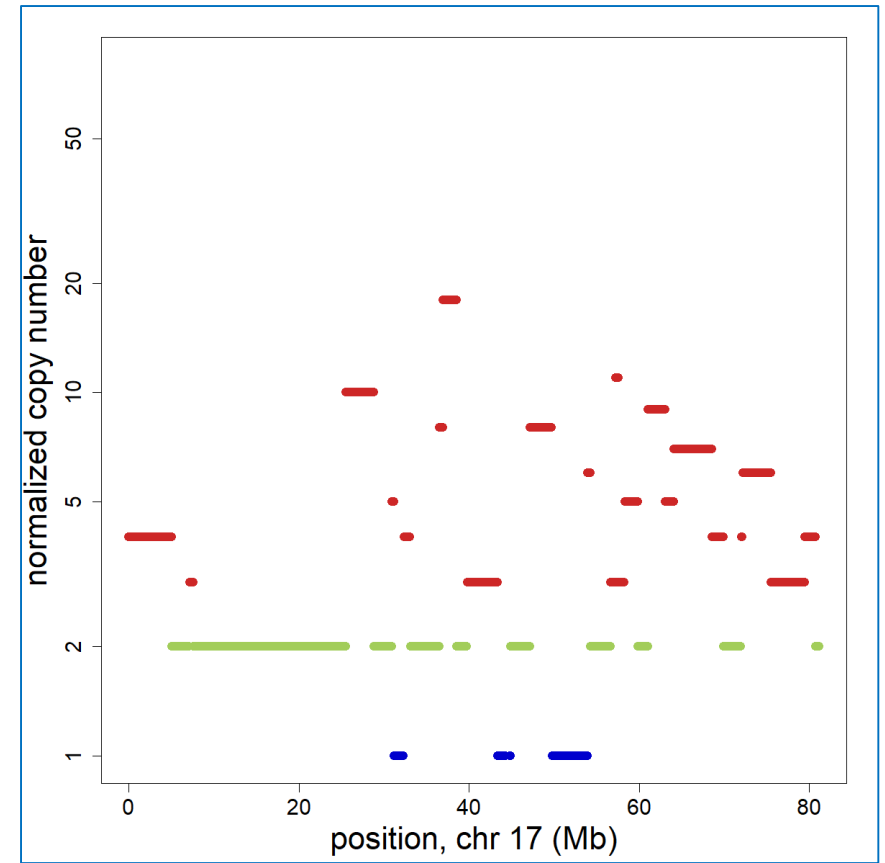

Control-FREEC

p-3

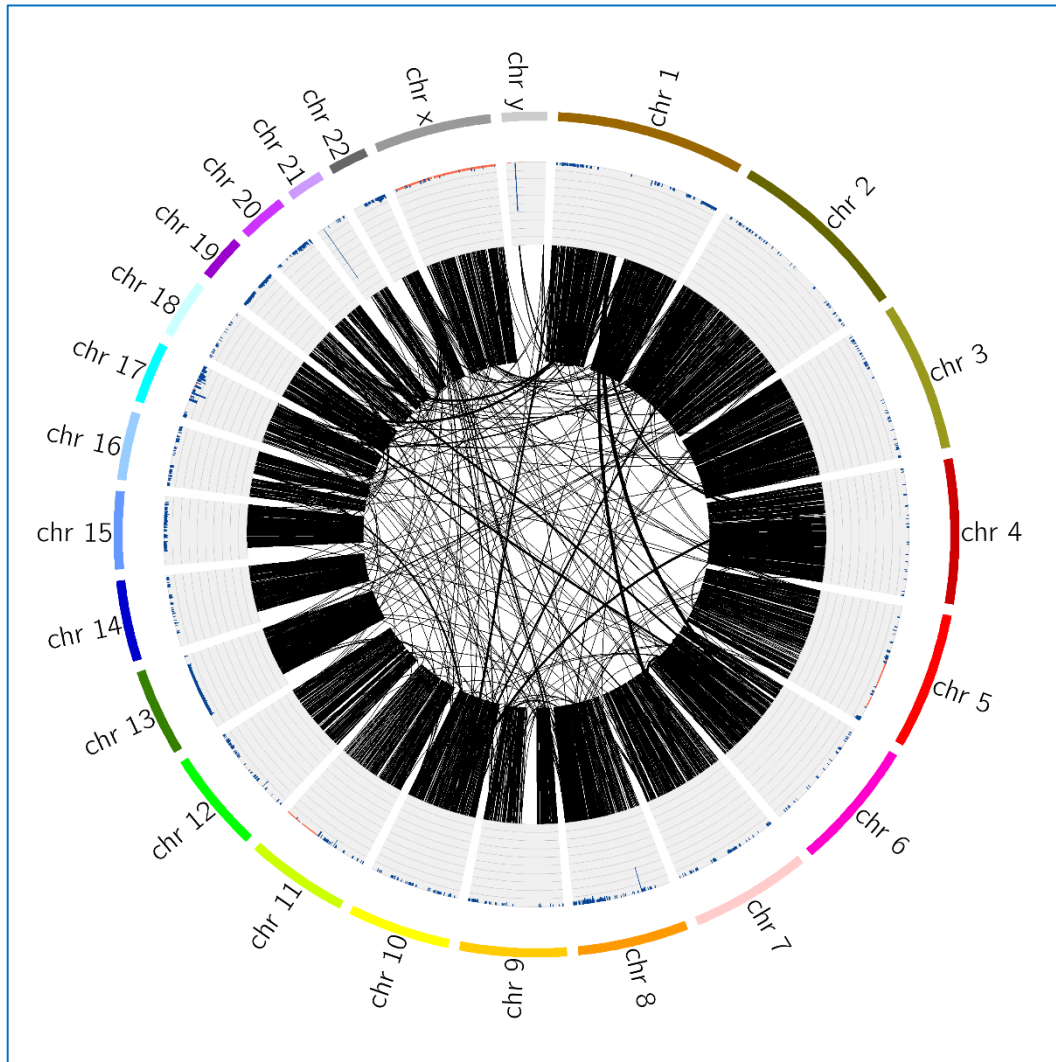

BreakDancer + Control-FREEC

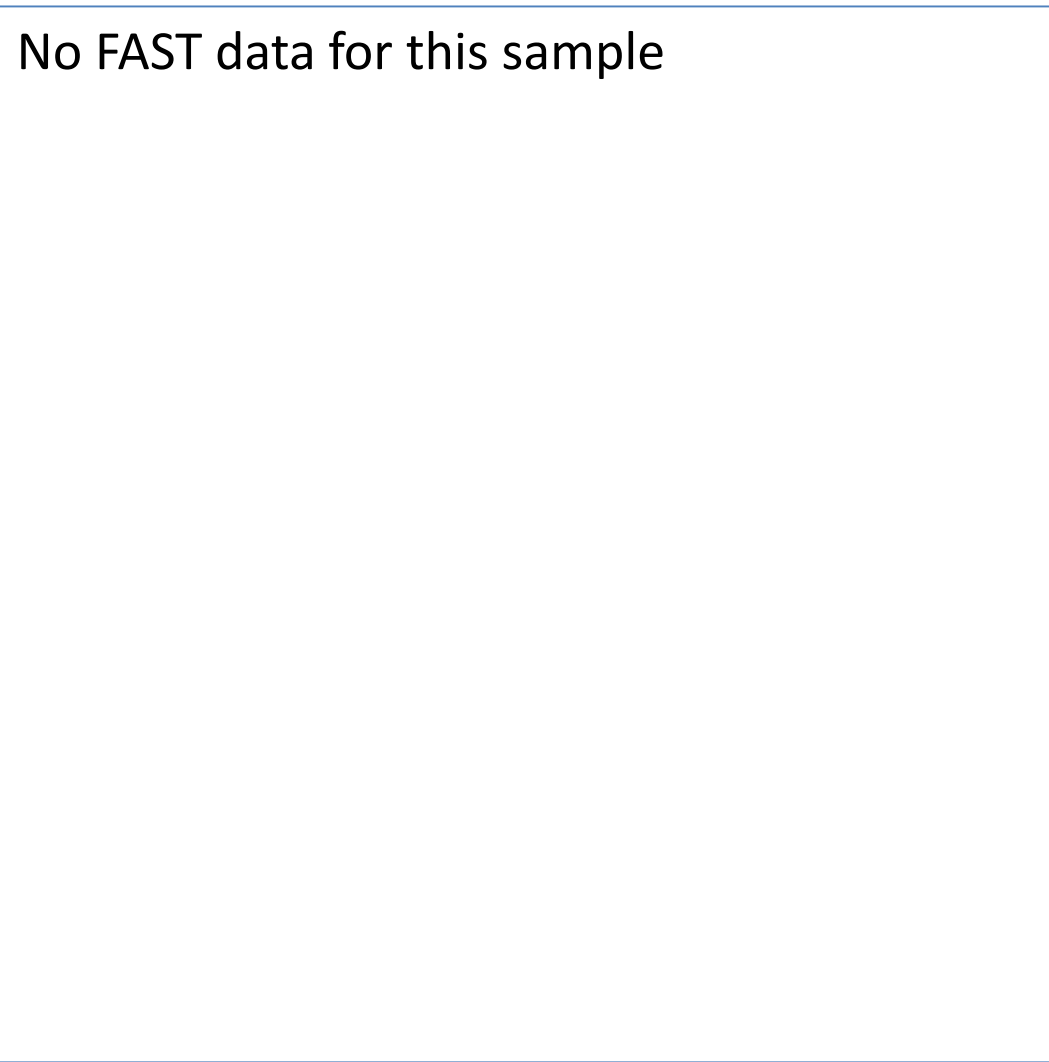

FAST – Whole Genome

p-3

No FAST data for this sample

FAST – ERBB2 amplicon



p-5

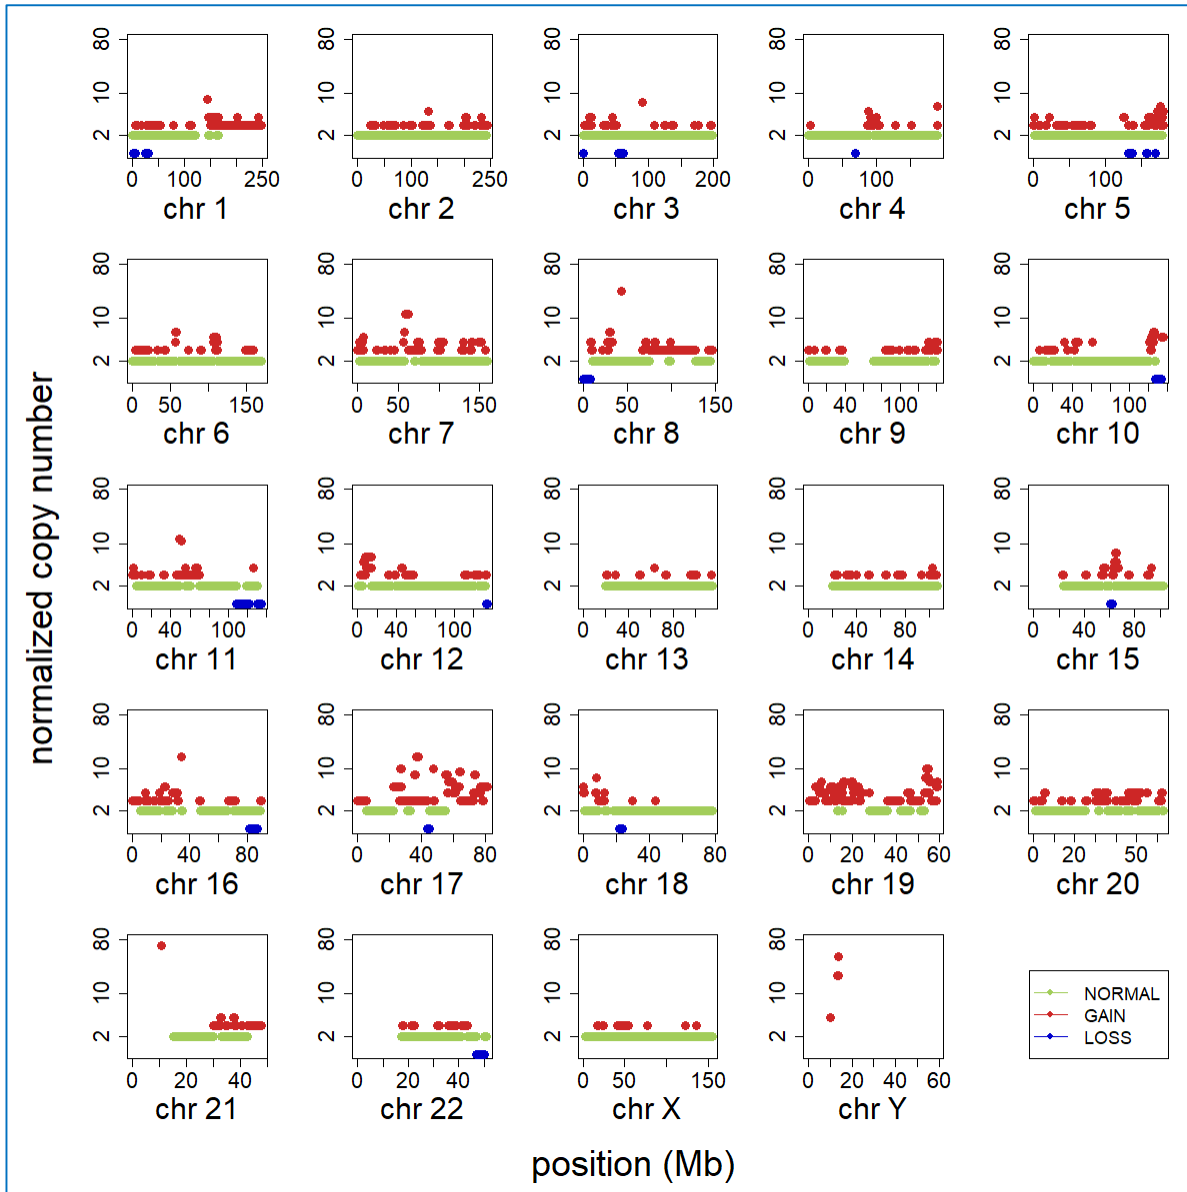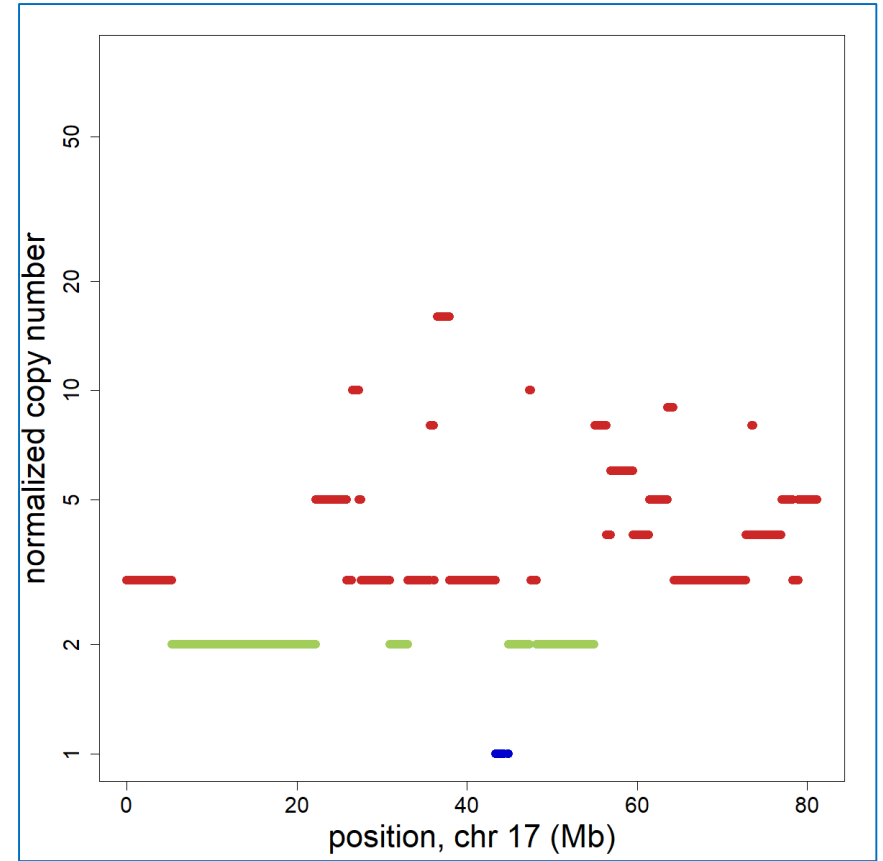

Control-FREEC

p-5

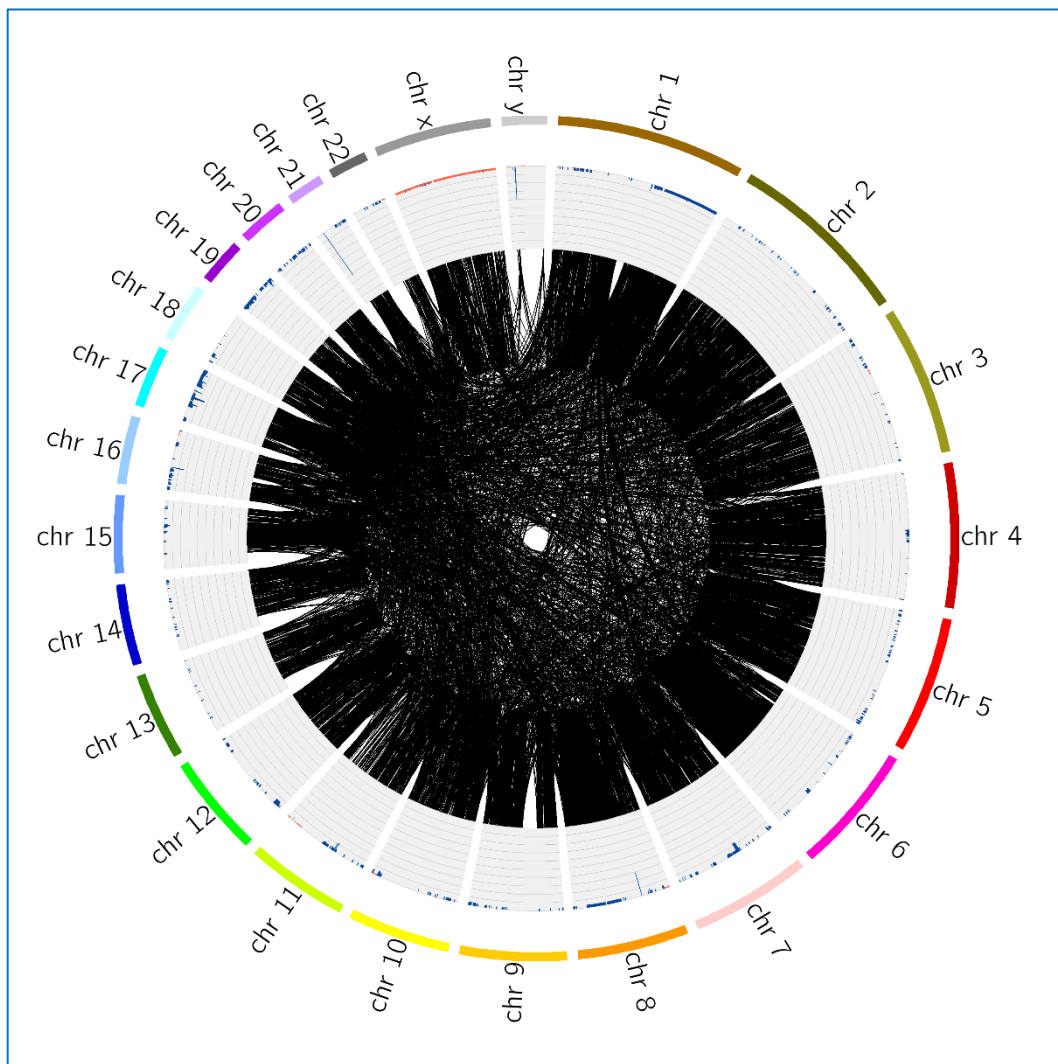

BreakDancer + Control-FREEC

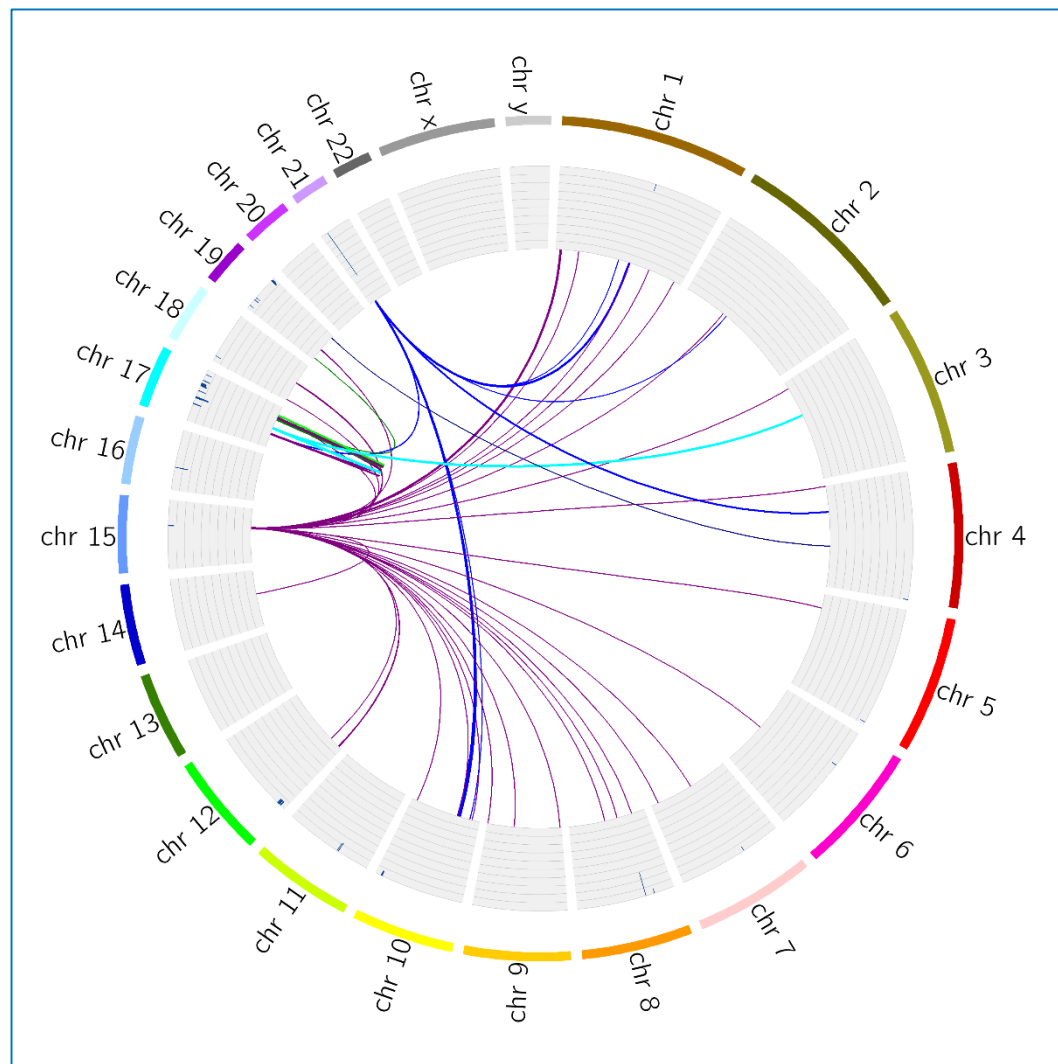

FAST - Whole Genome

p-5

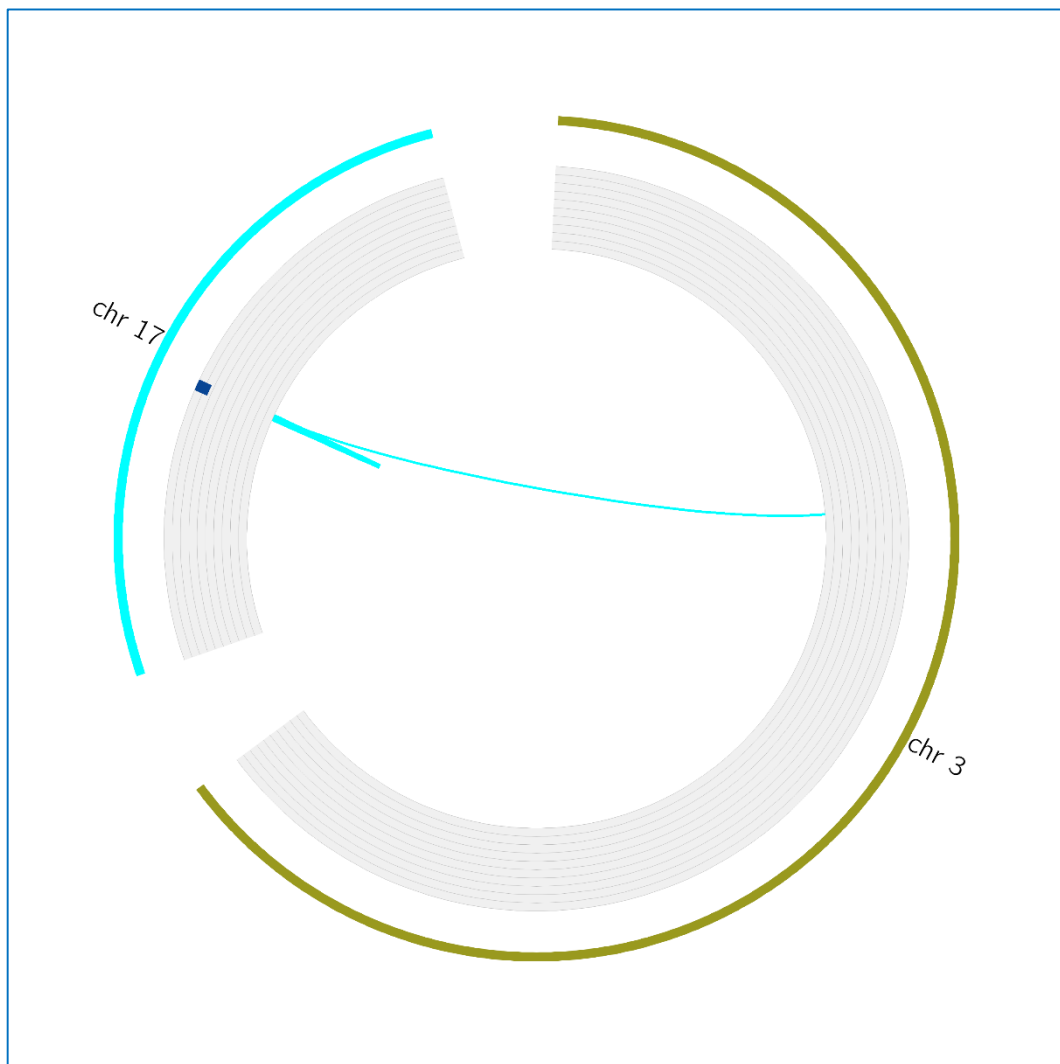

FAST – ERBB2 amplicon

p-6

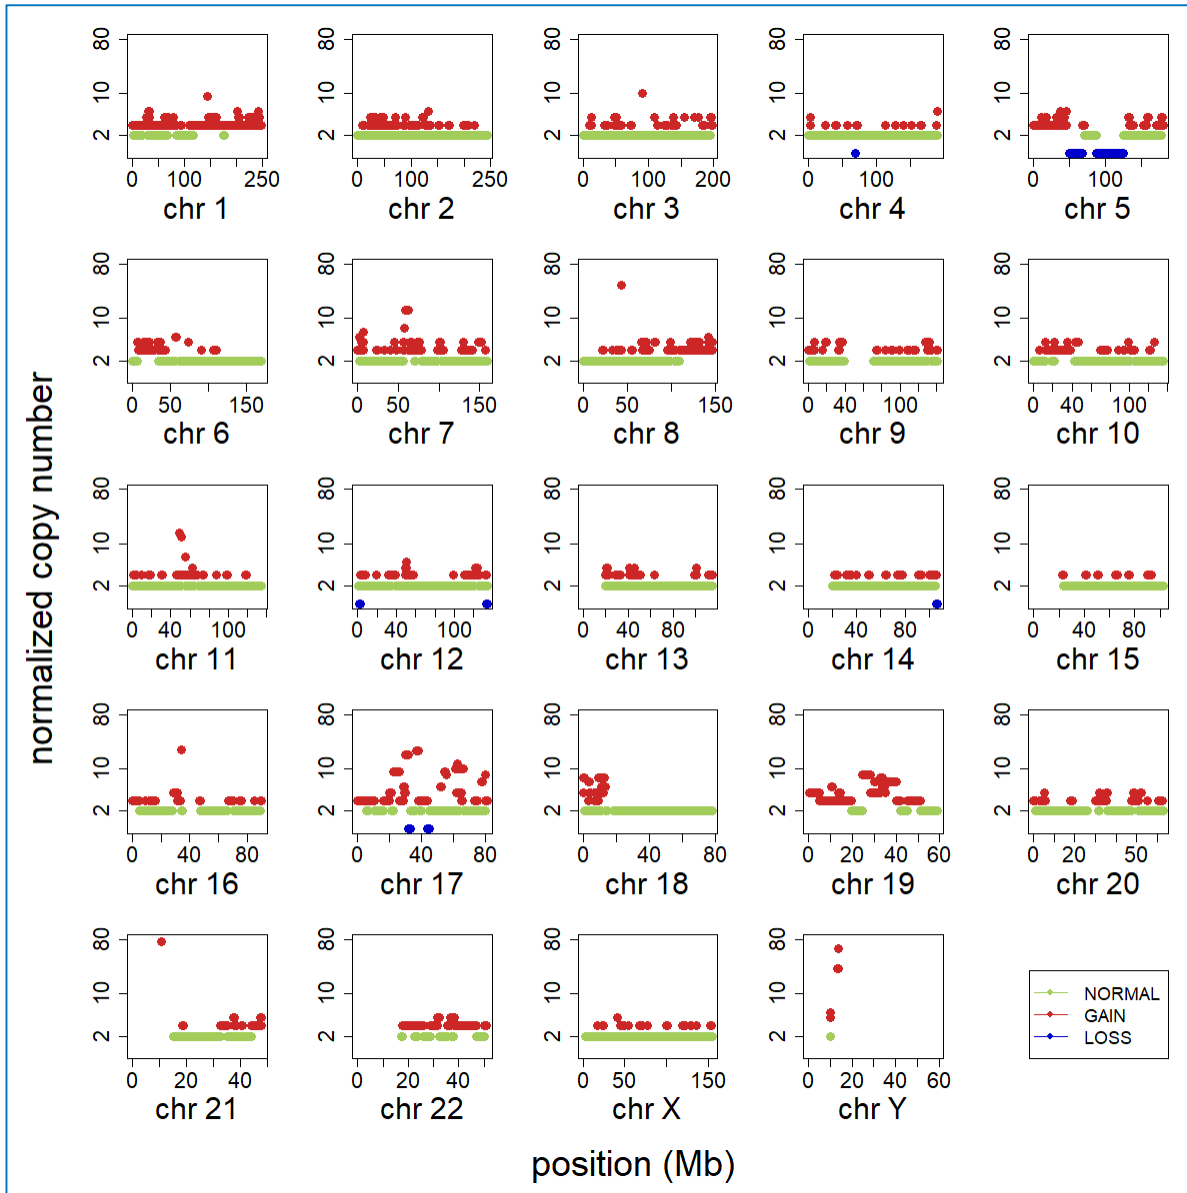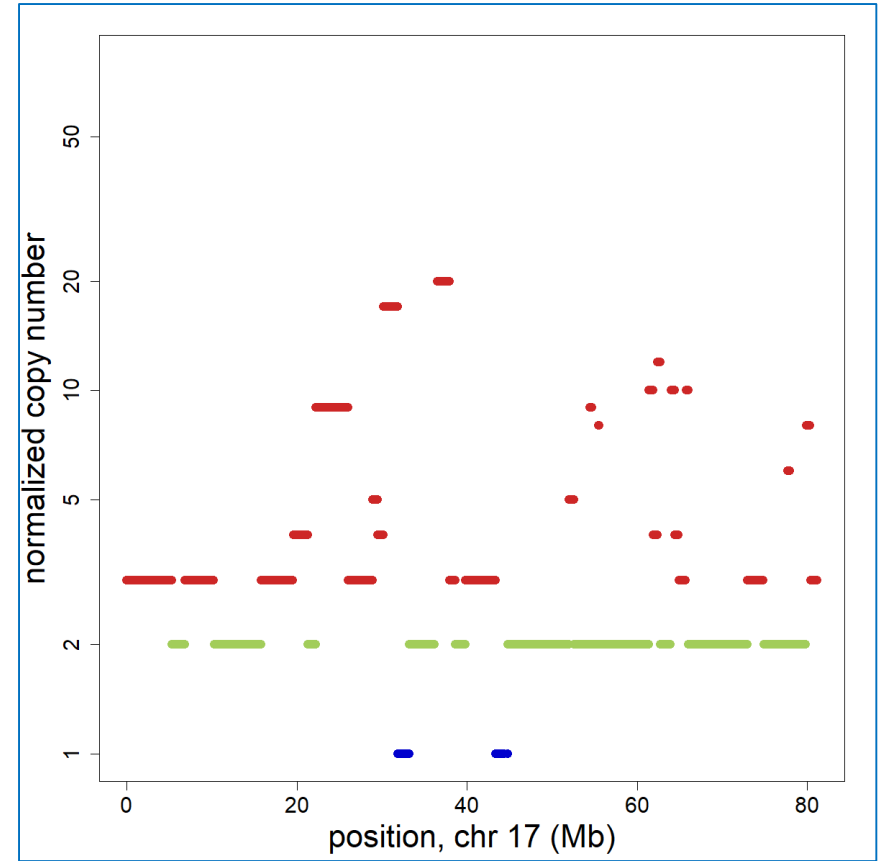

Control-FREEC

p-6

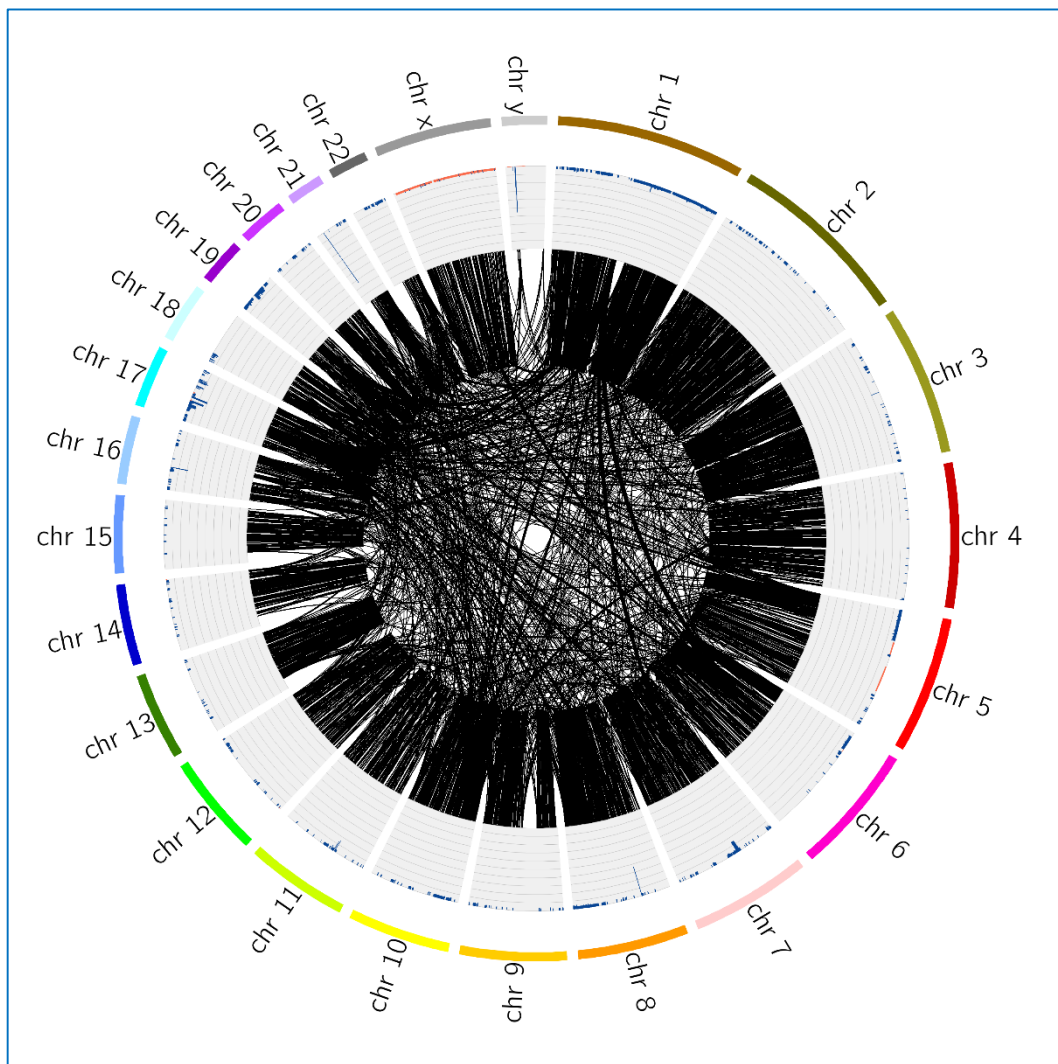

BreakDancer + Control-FREEC

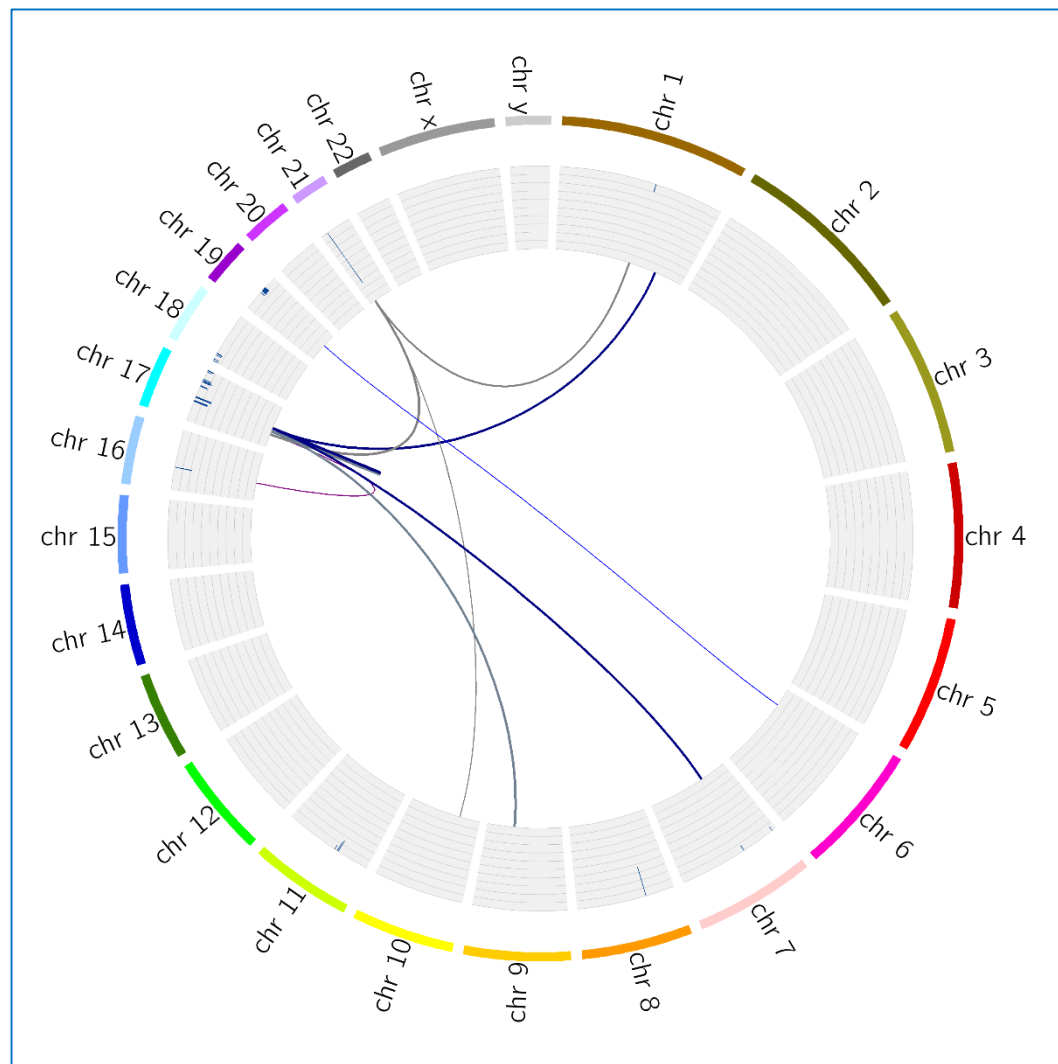

FAST - Whole Genome

p-6

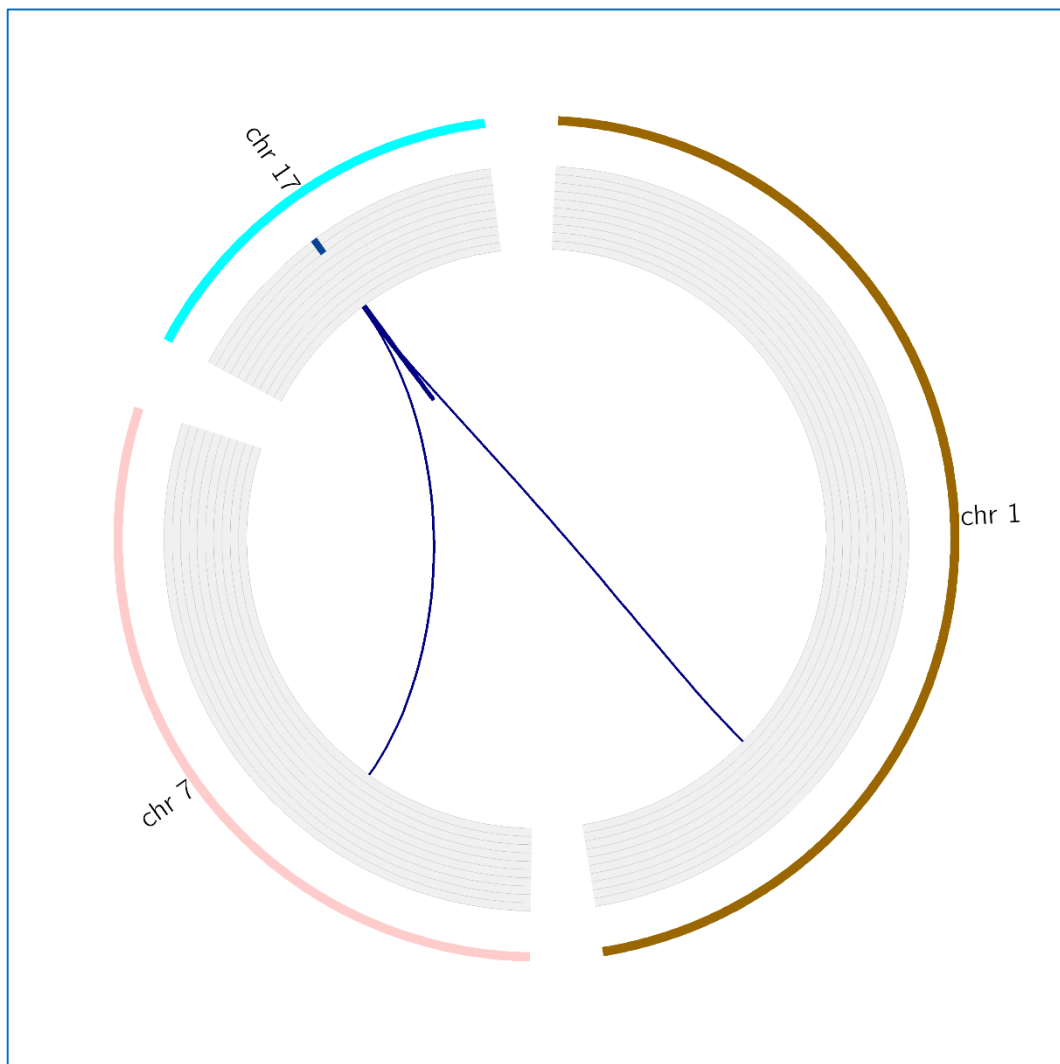

FAST – ERBB2 amplicon

p-8

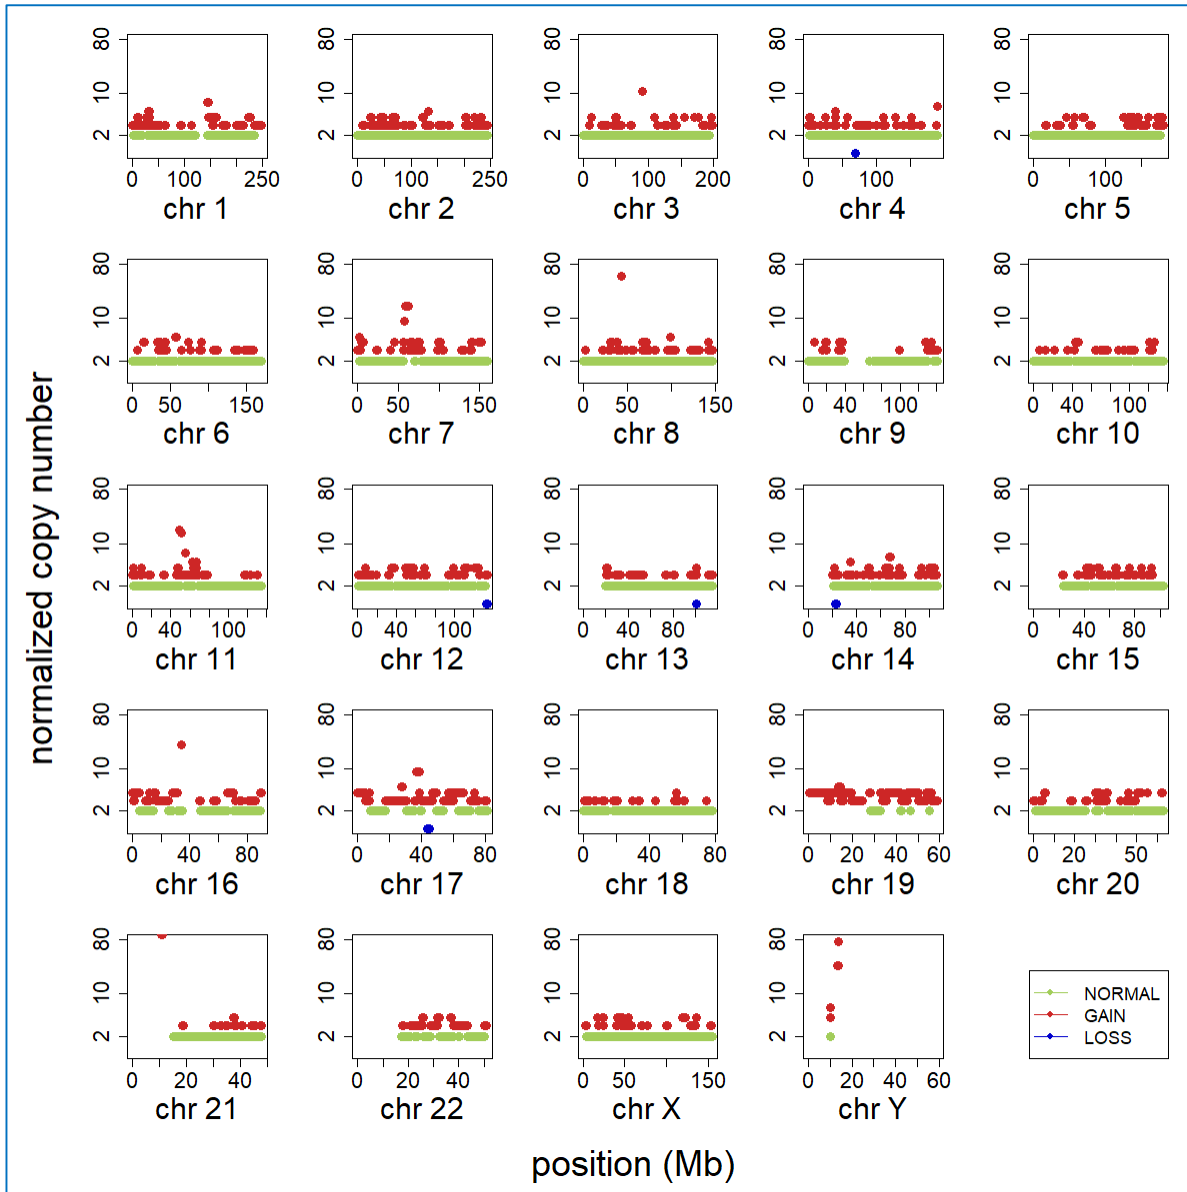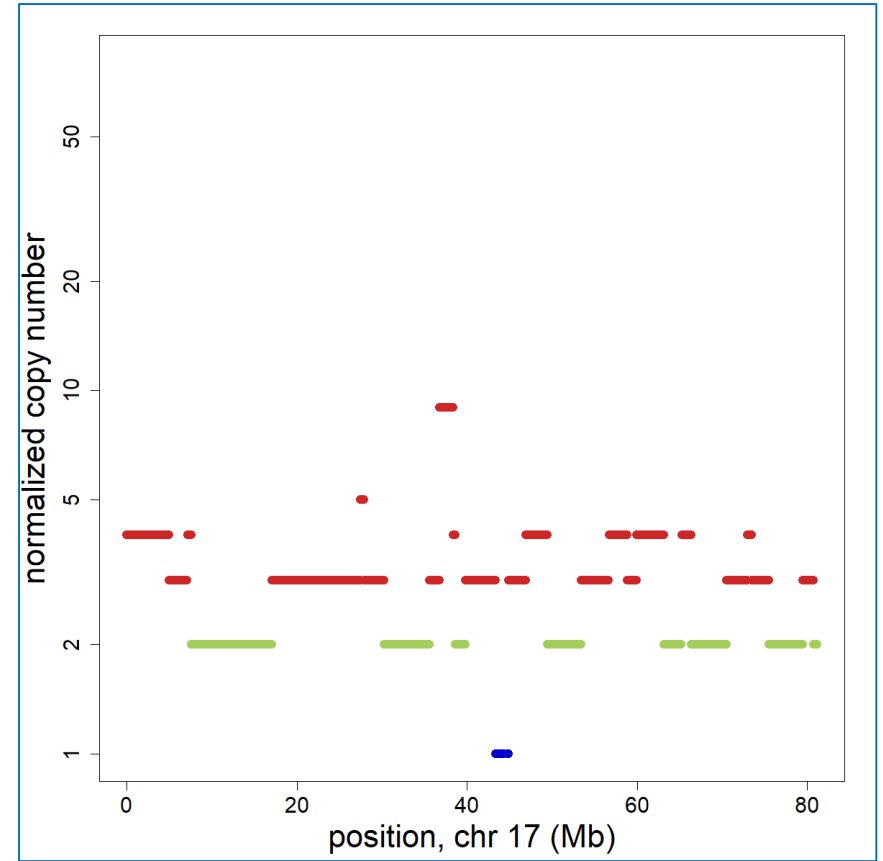

Control-FREEC

p-8

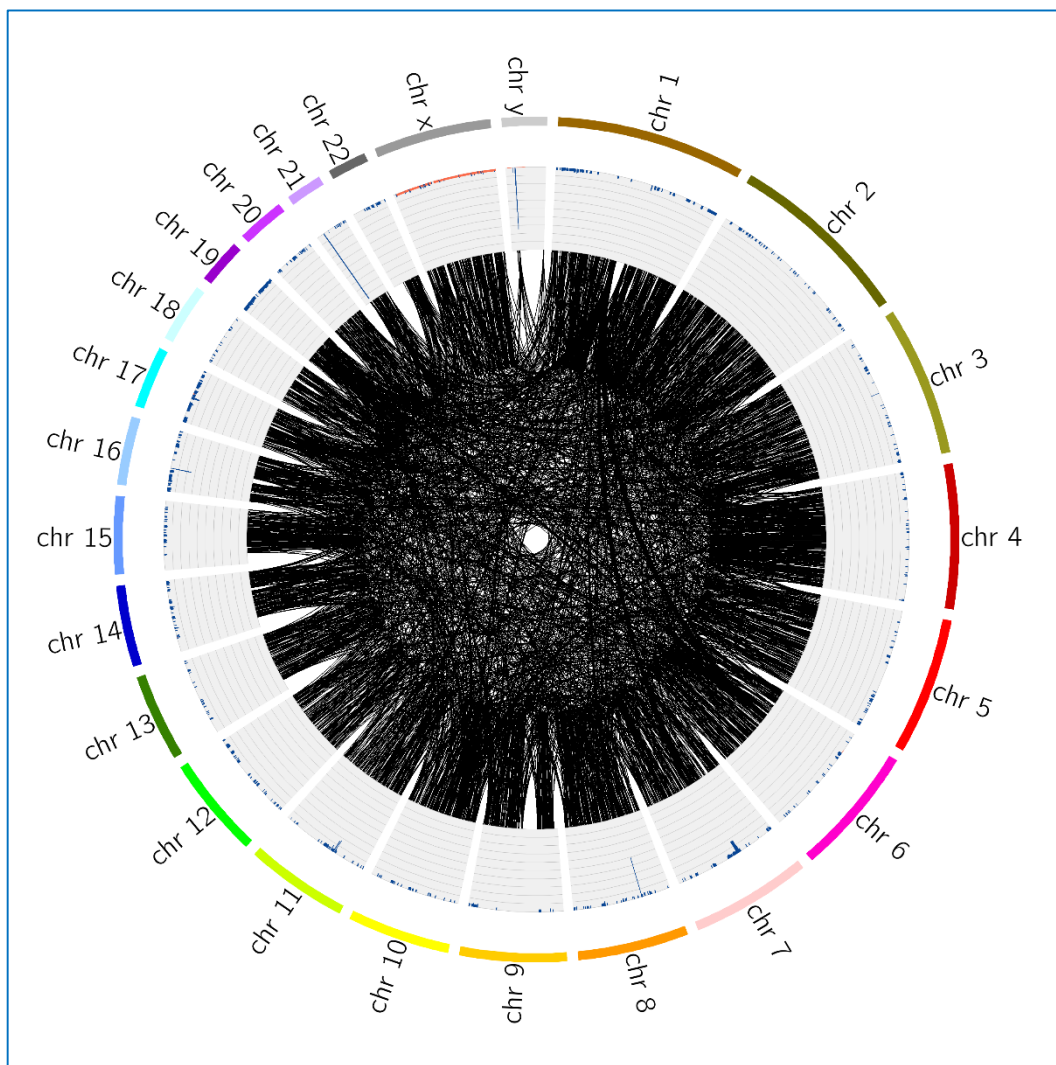

BreakDancer + Control-FREEC

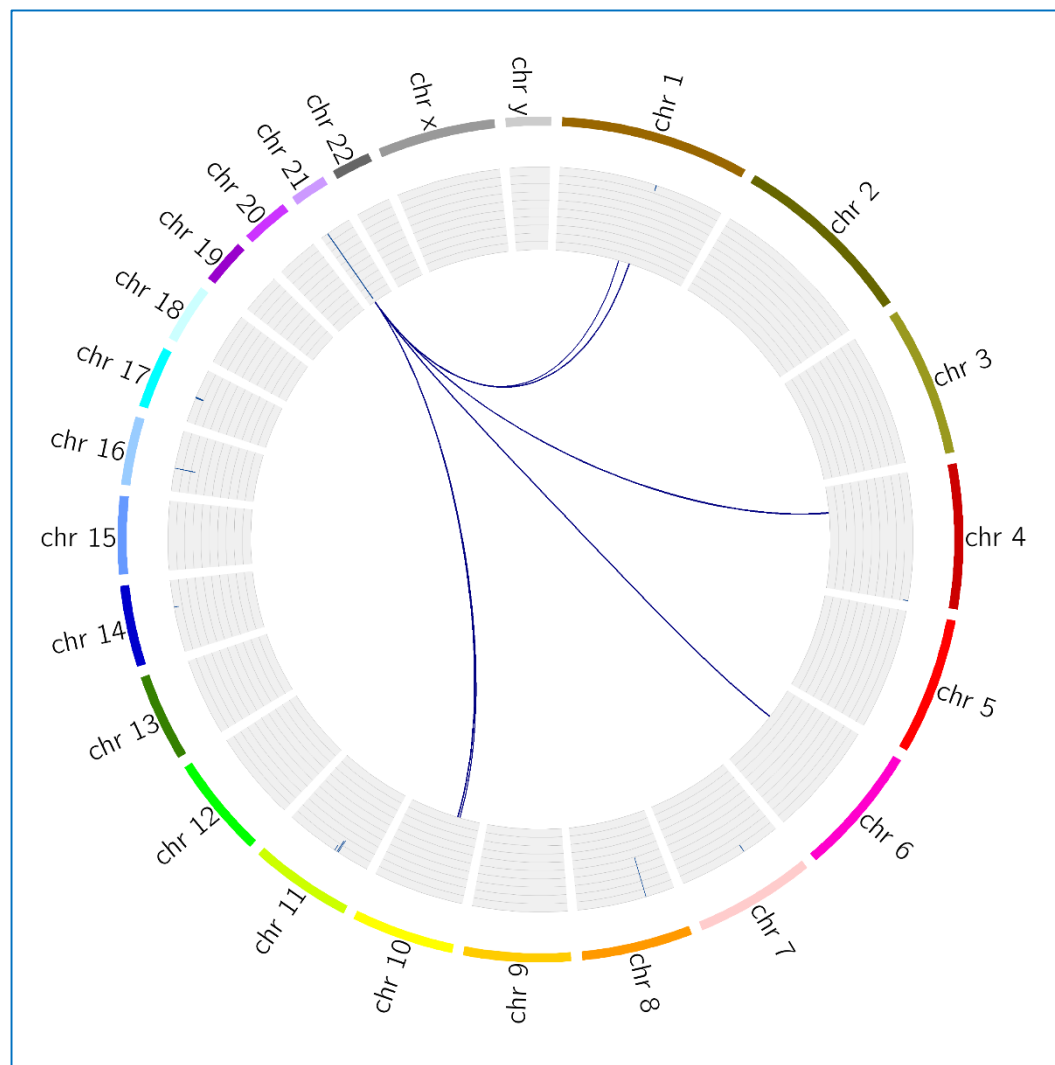

FAST - Whole Genome



p-8

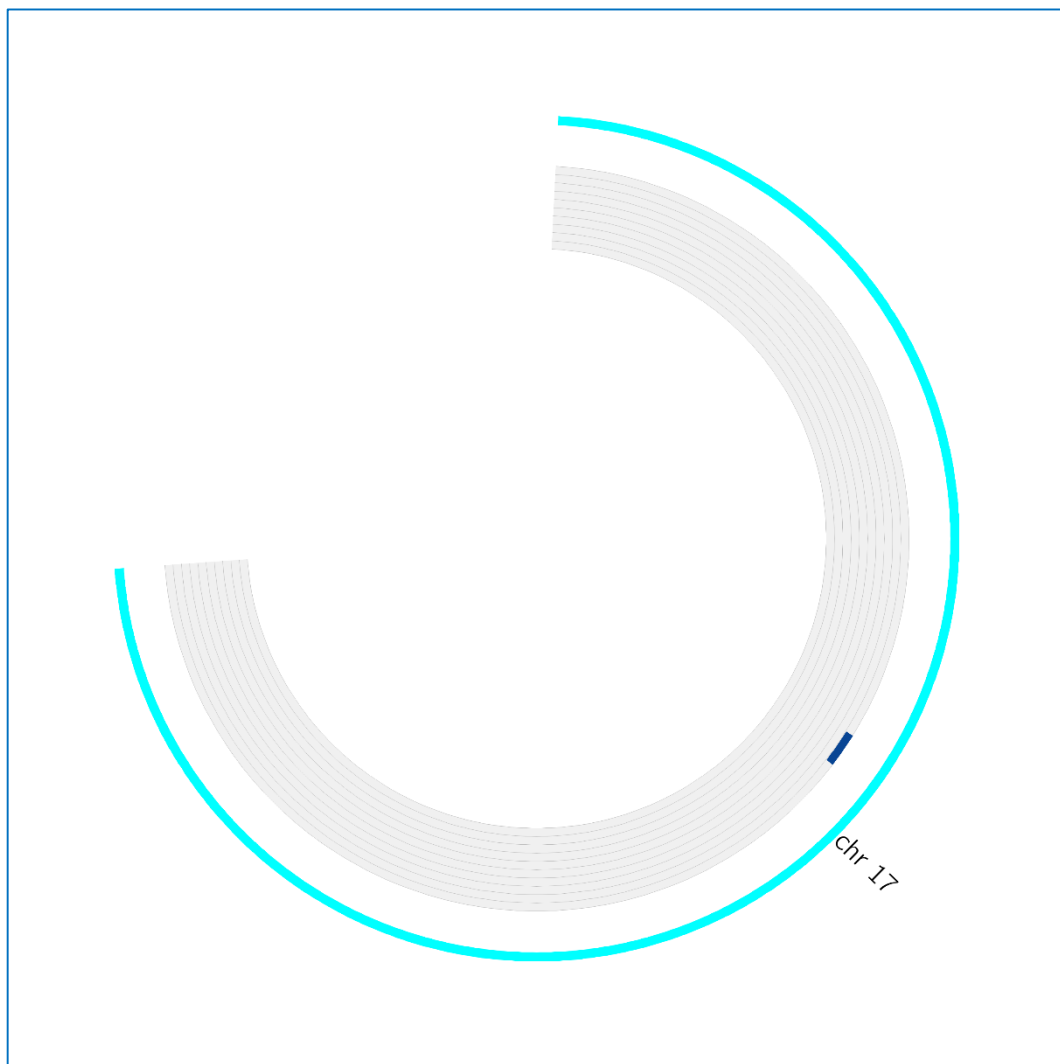

FAST – ERBB2 amplicon

m-11

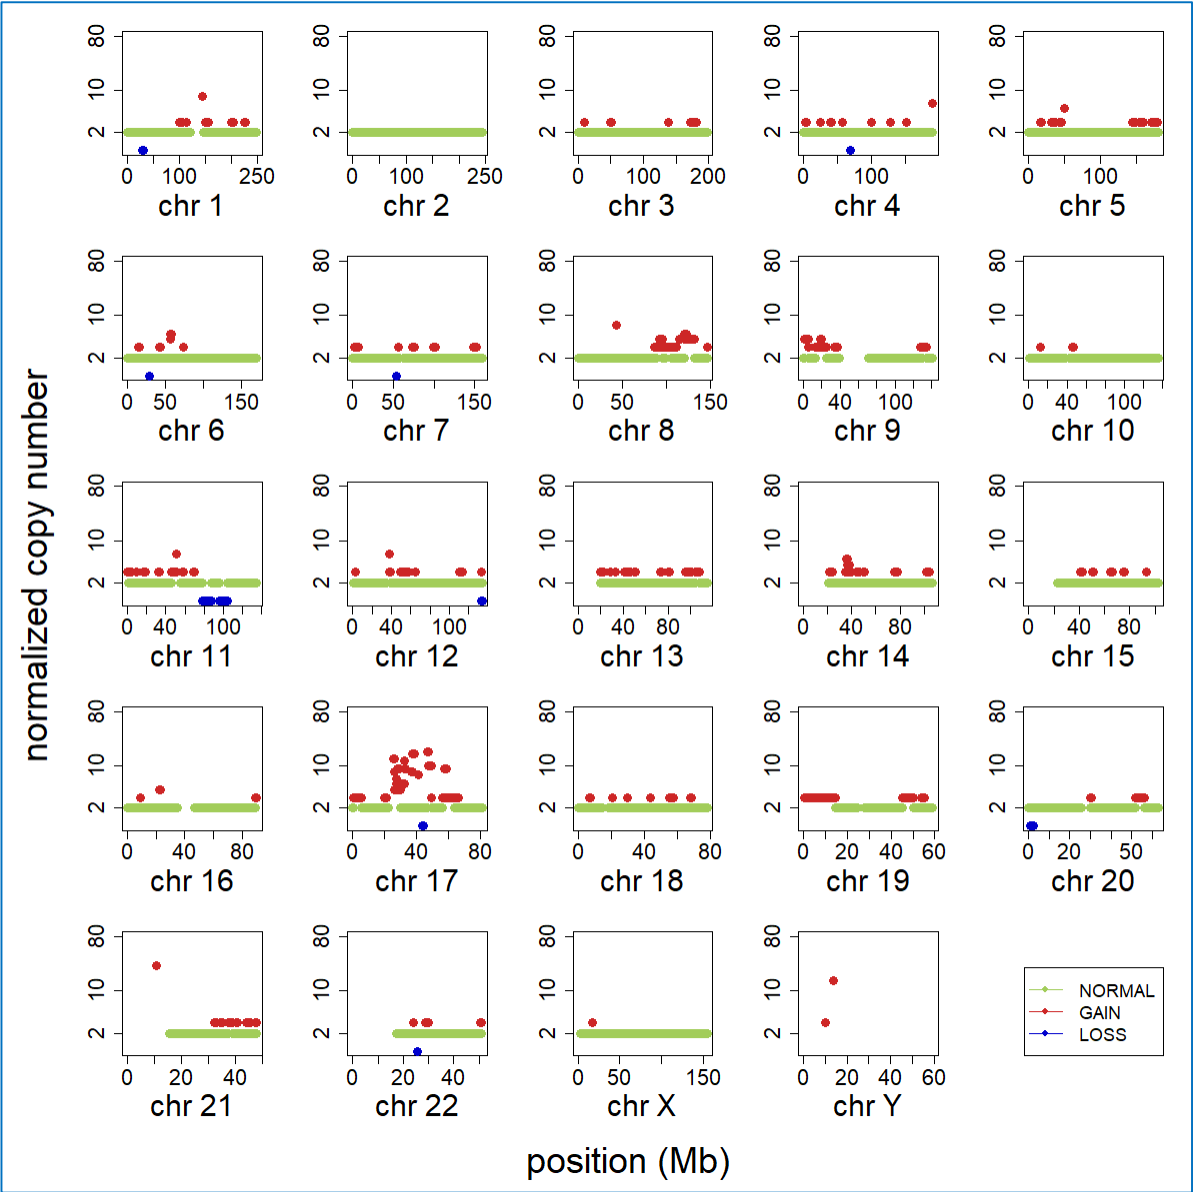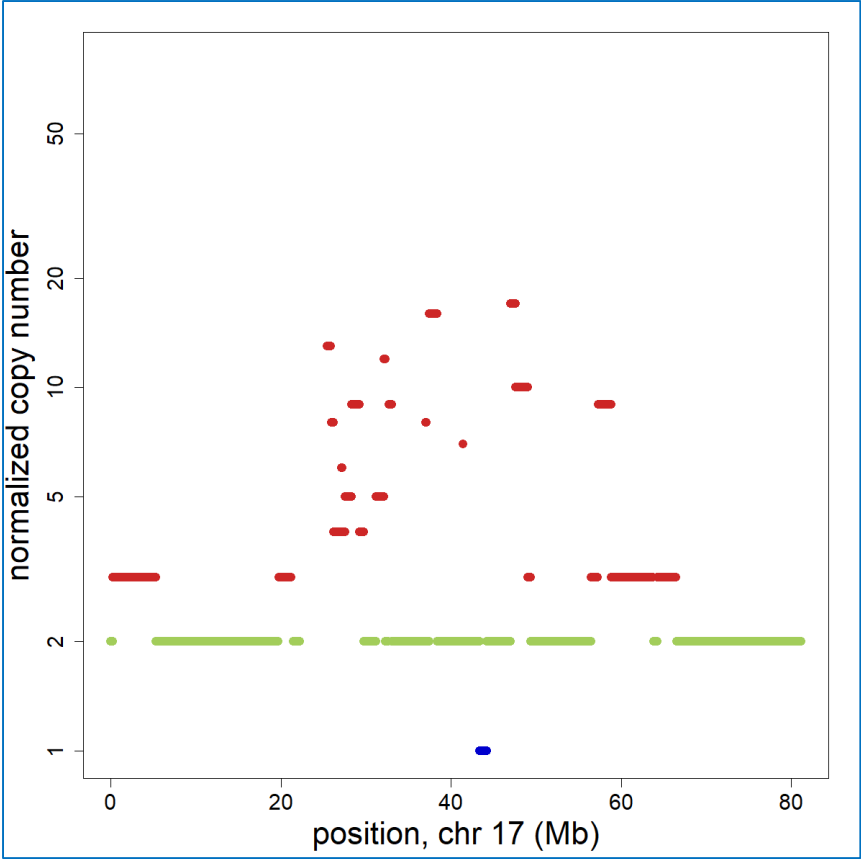

Control-FREEC

m-11

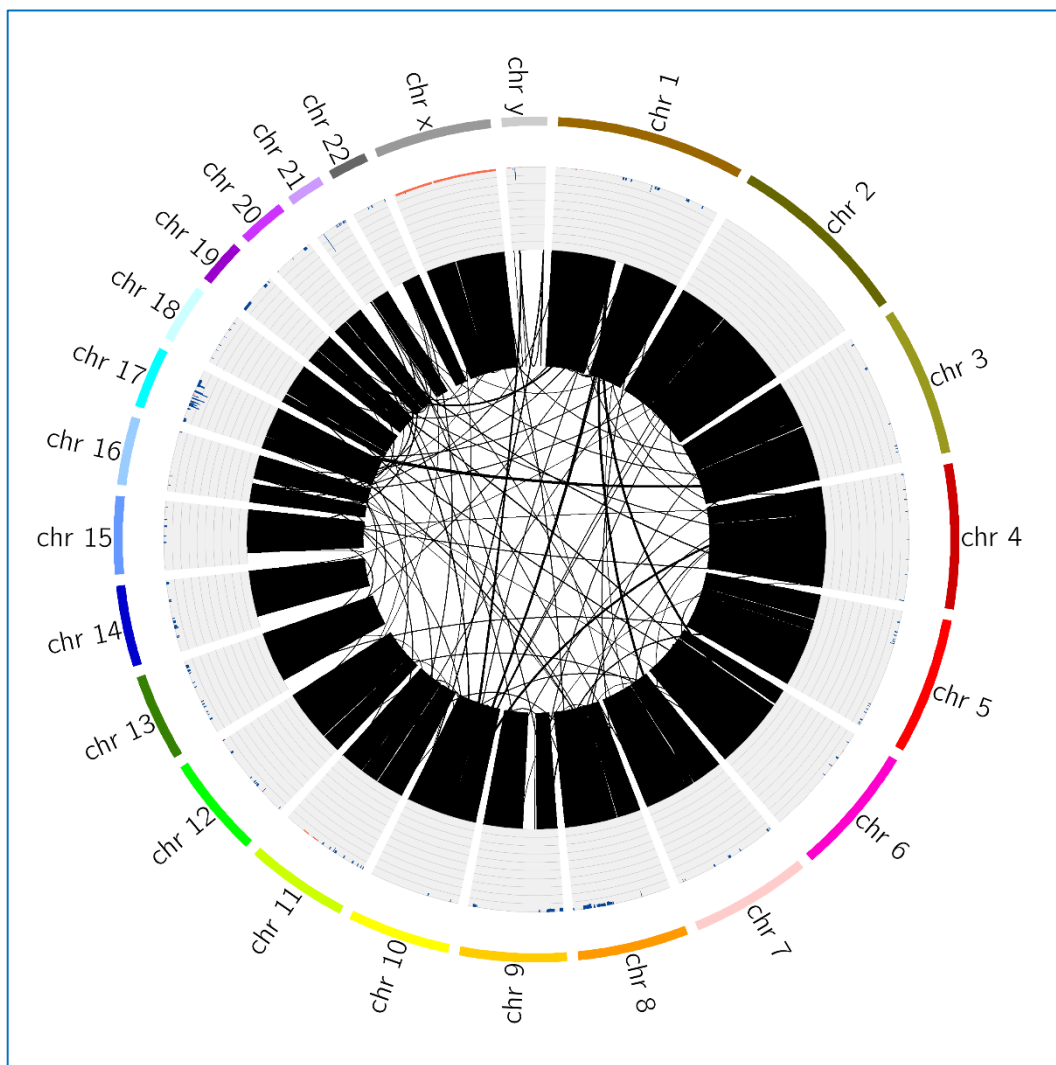

BreakDancer + Control-FREEC

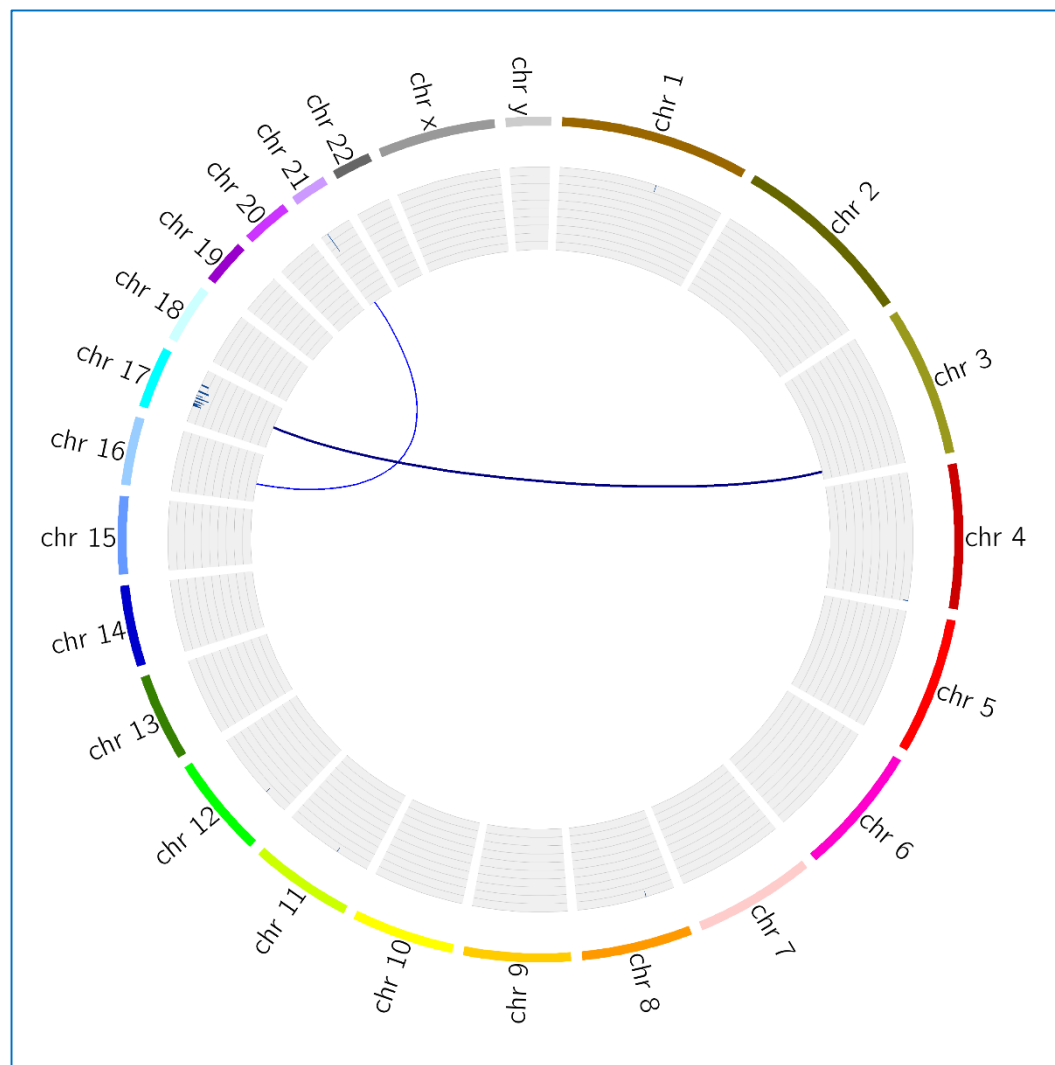

FAST – Whole Genome

m-11

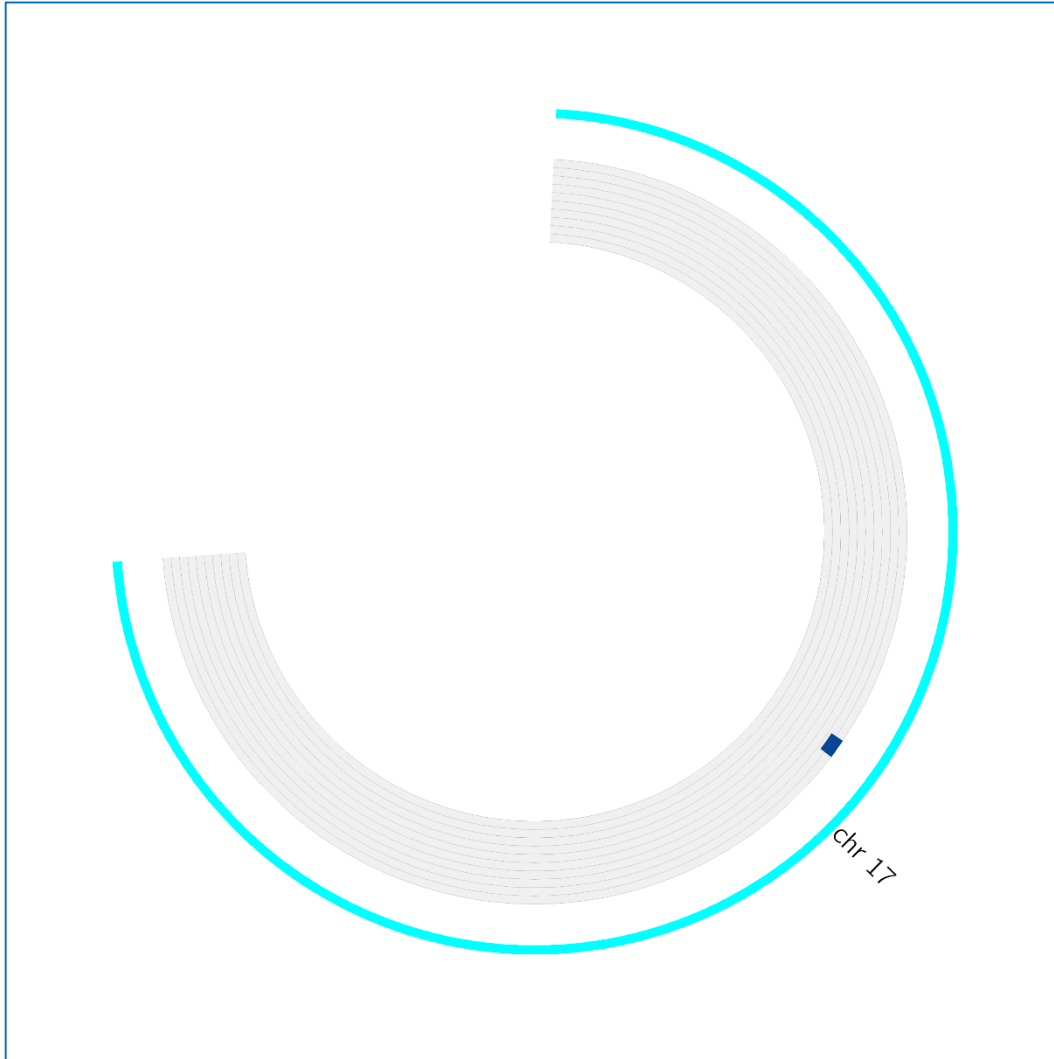

FAST – ERBB2 amplicon

m-12

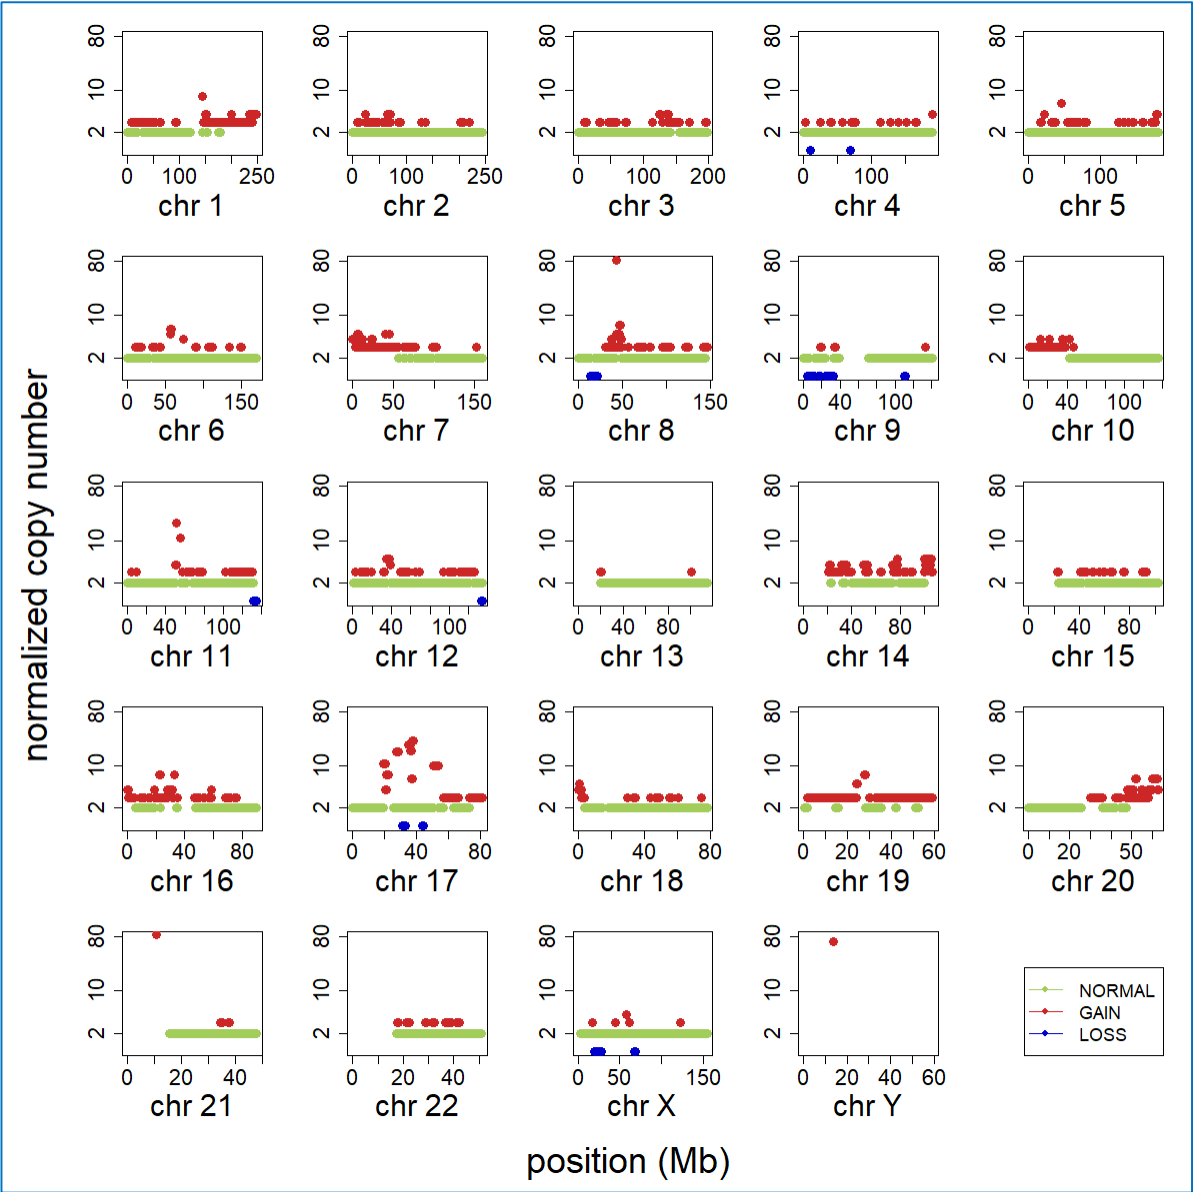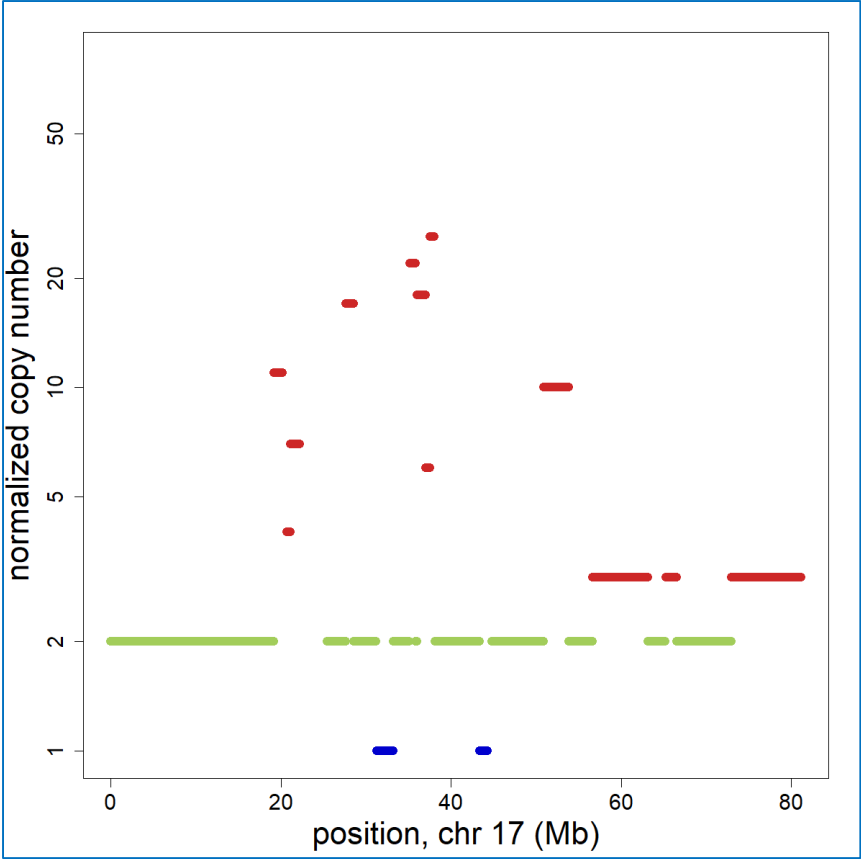

Control-FREEC

m-12

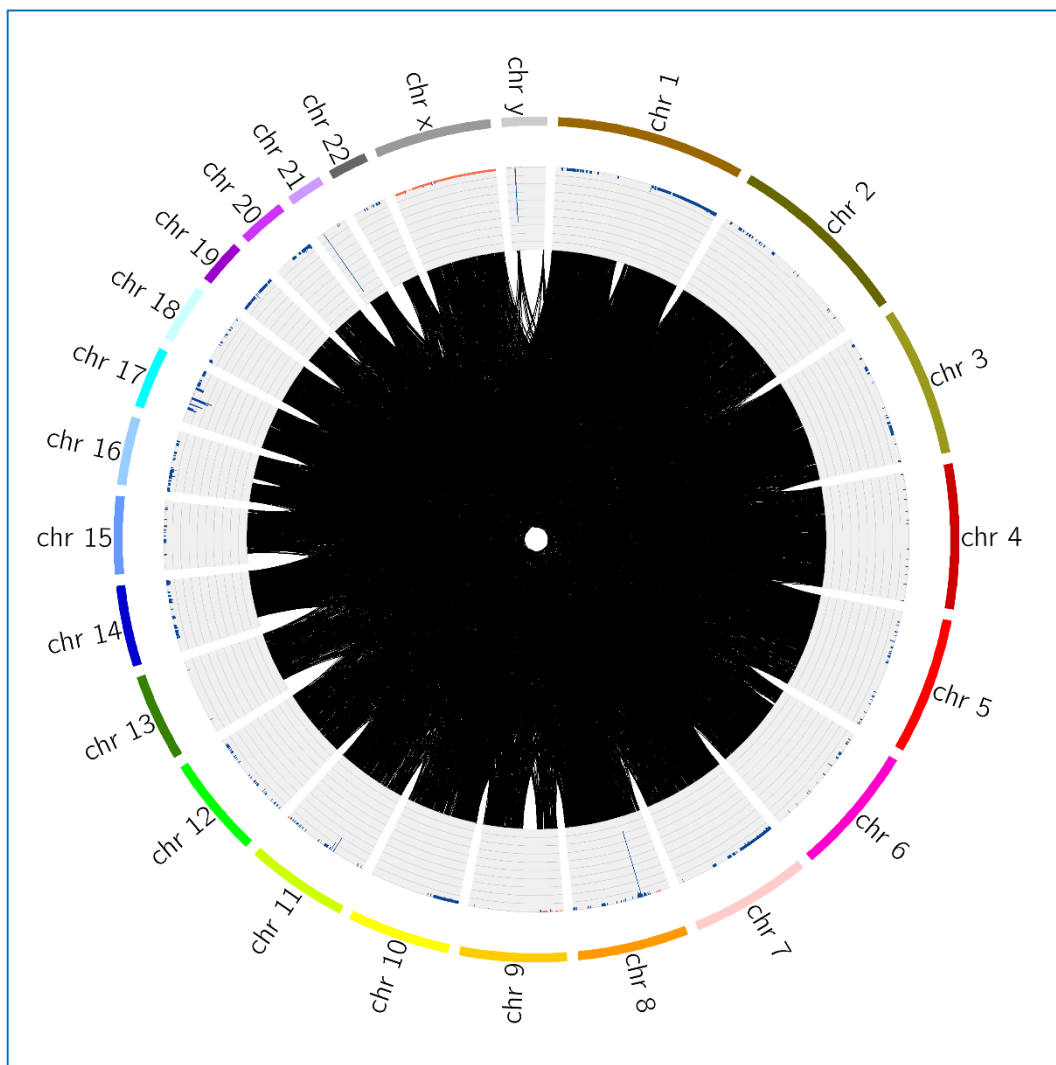

BreakDancer + Control-FREEC

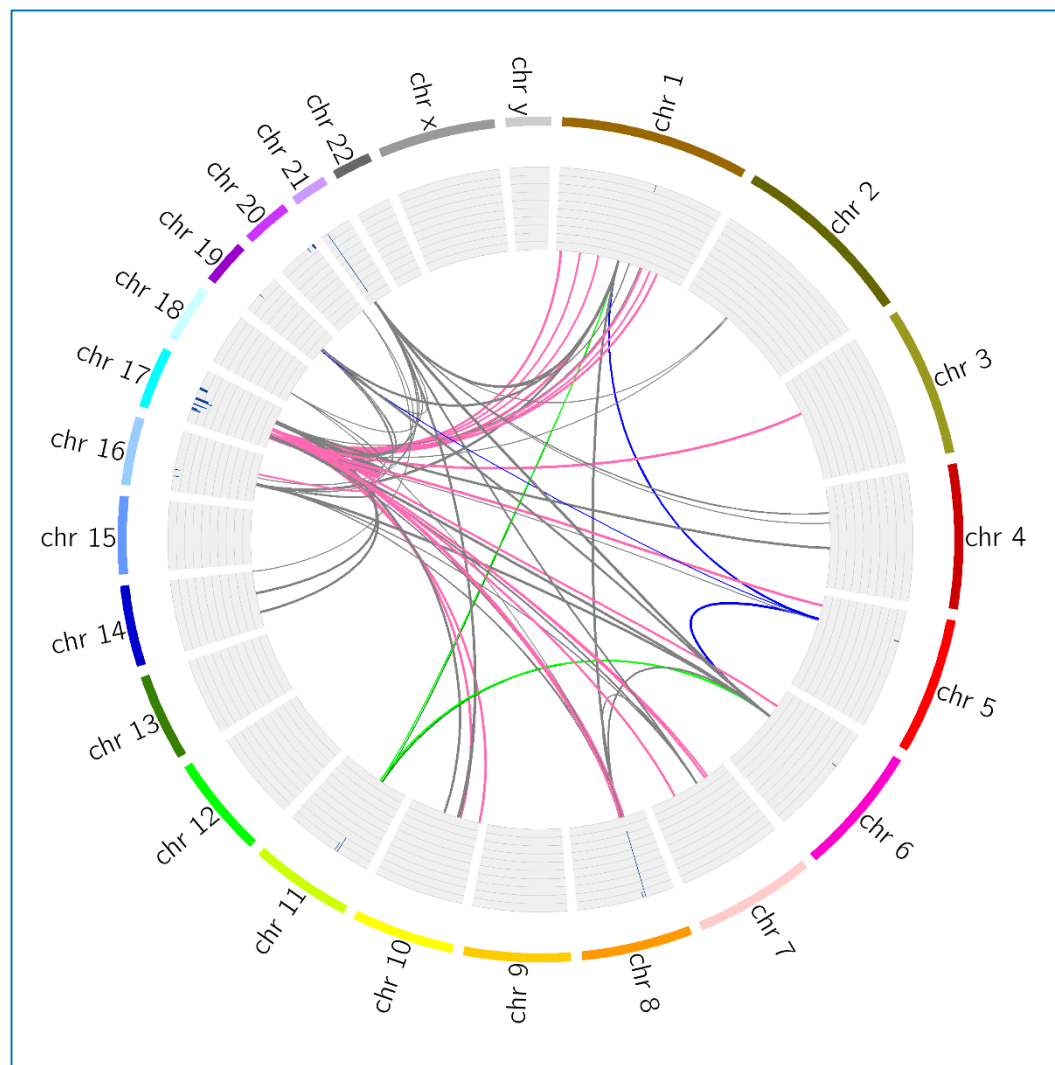

FAST - Whole Genome

m-12

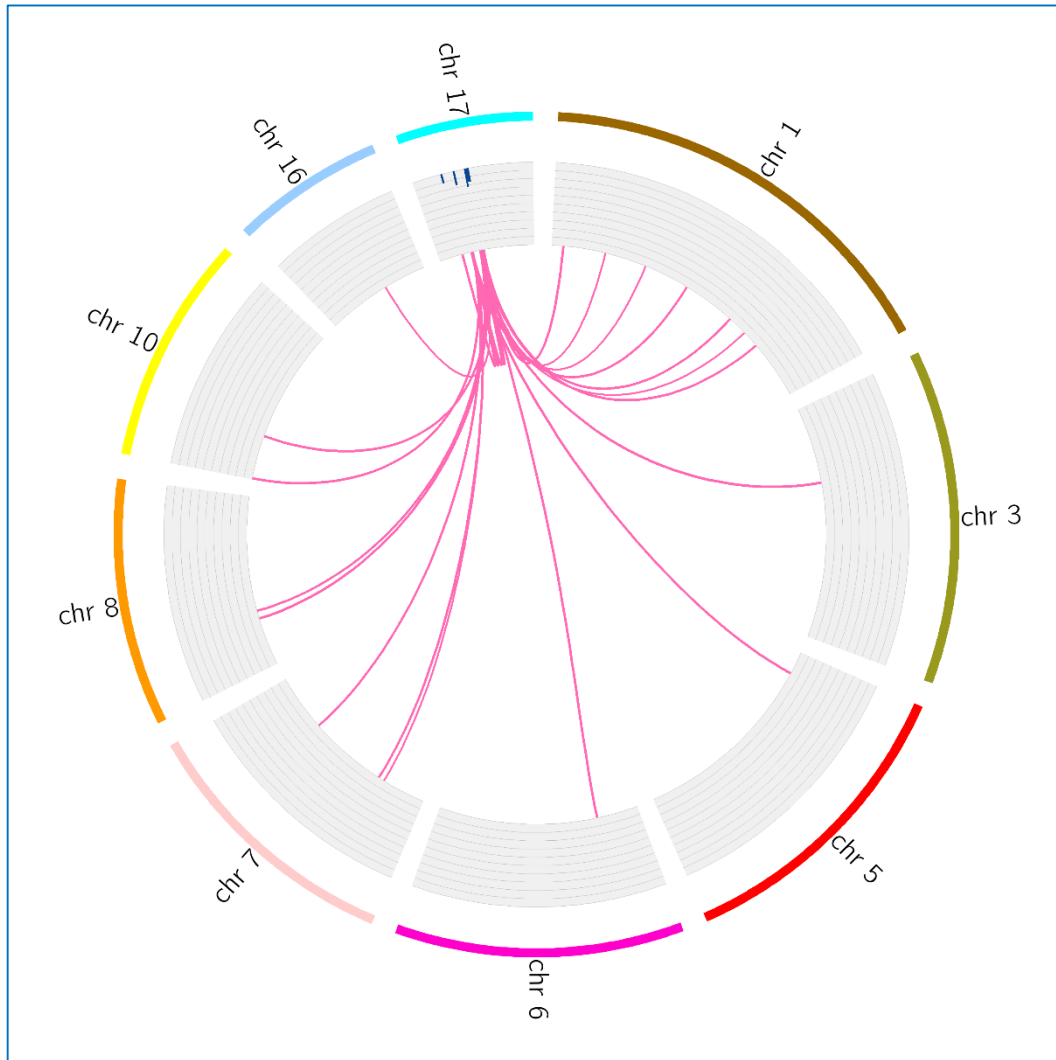

FAST – ERBB2 amplicon

m-13

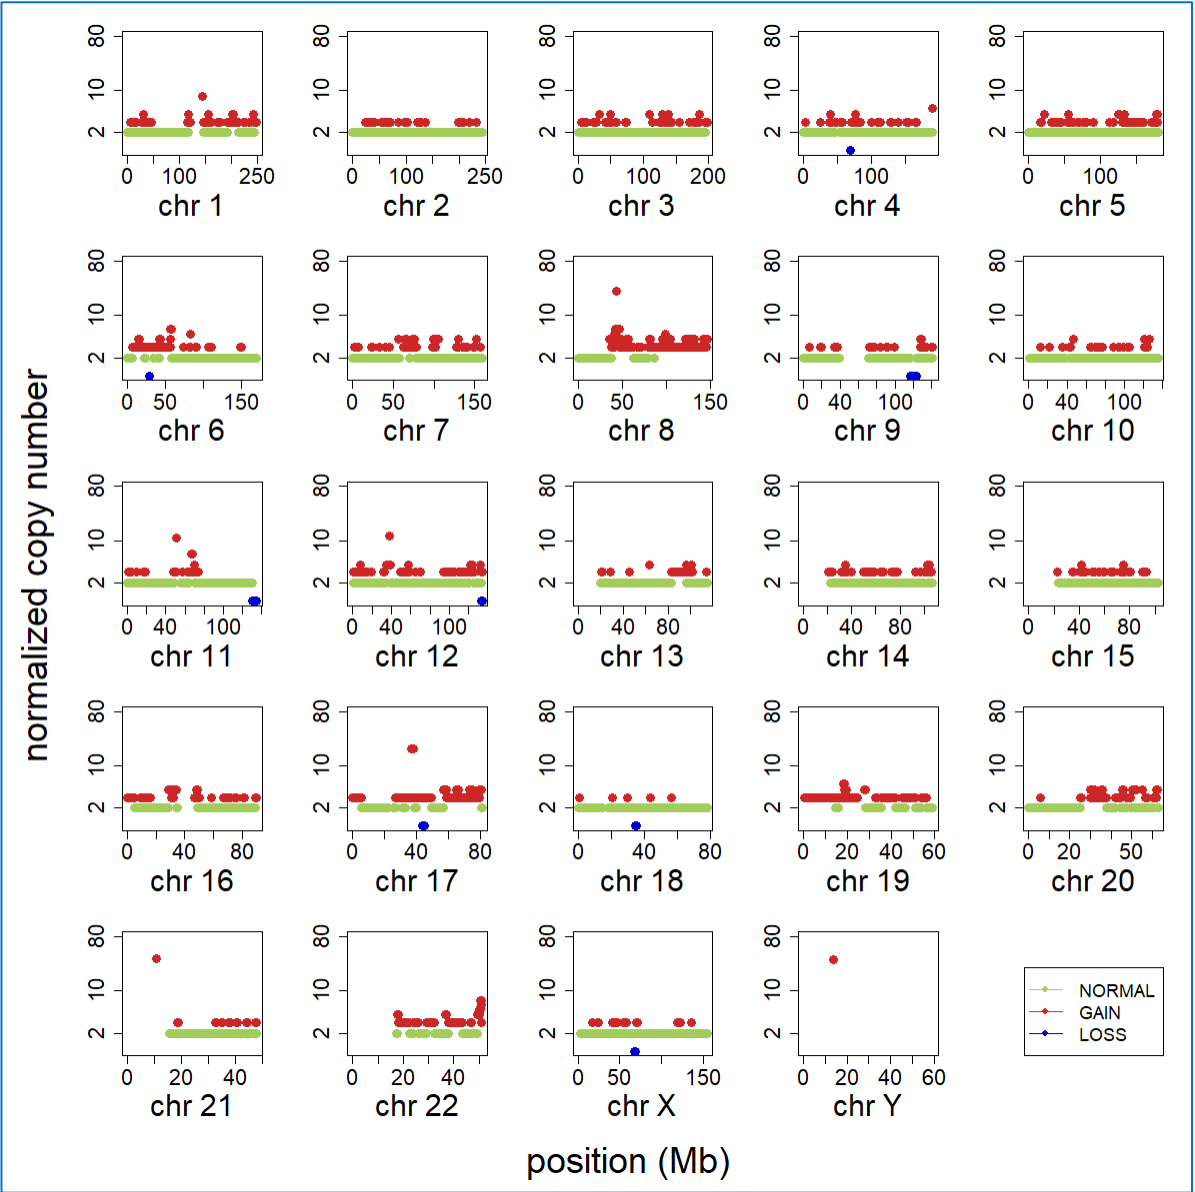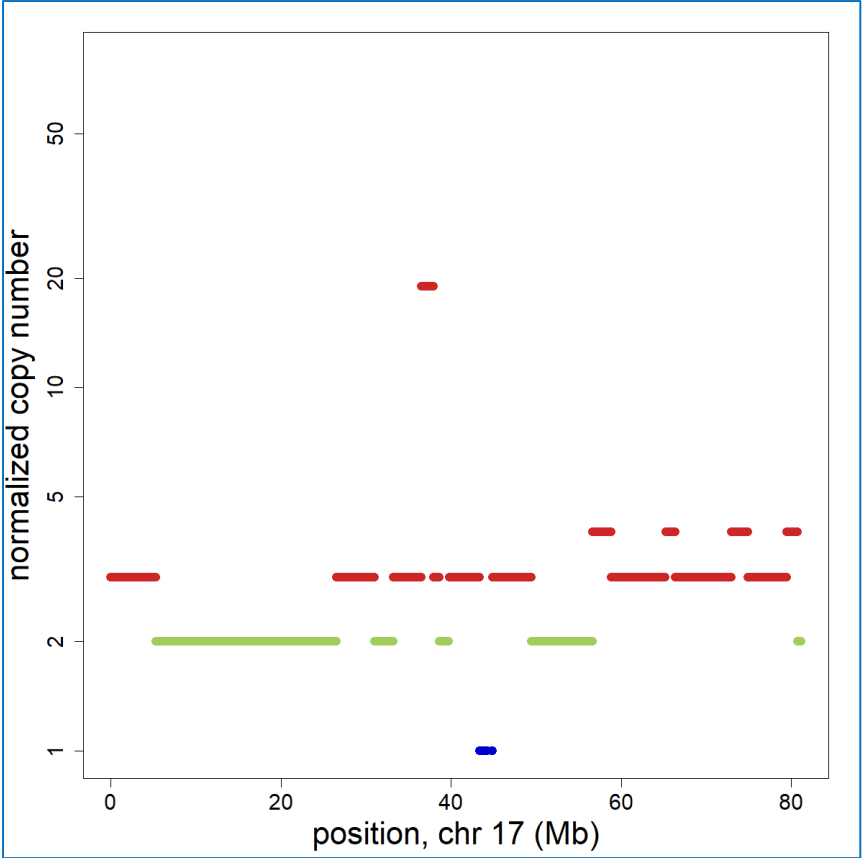

Control-FREEC



m-13

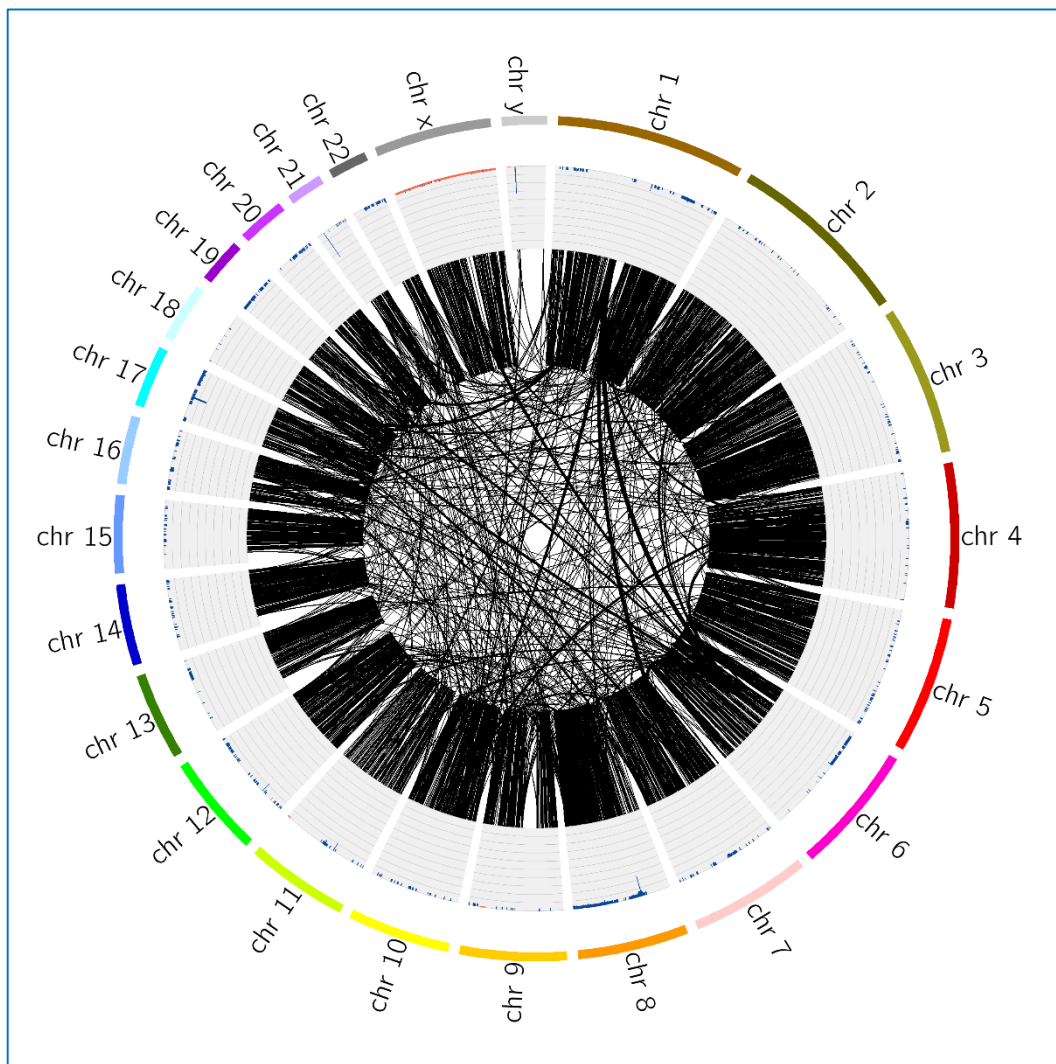

BreakDancer + Control-FREEC

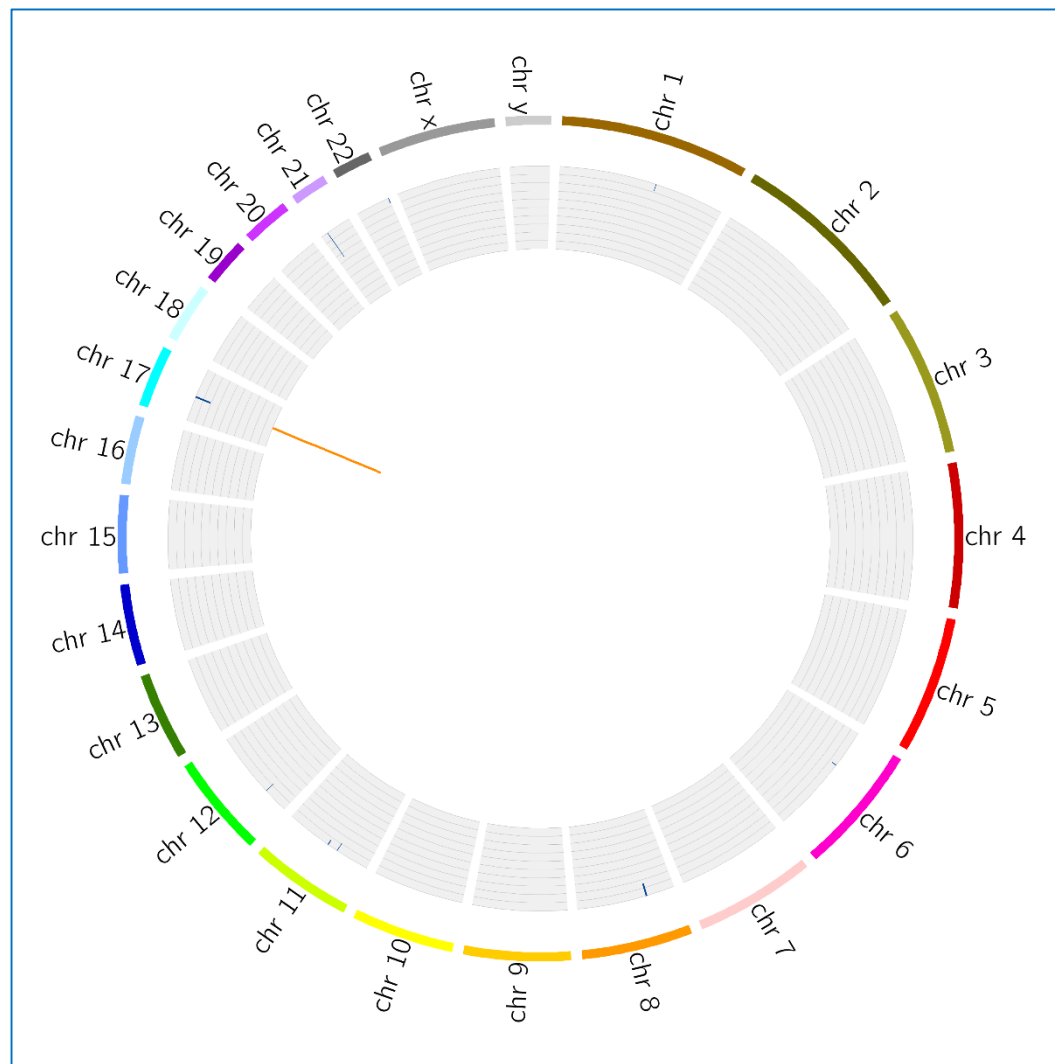

FAST – Whole Genome

m-13

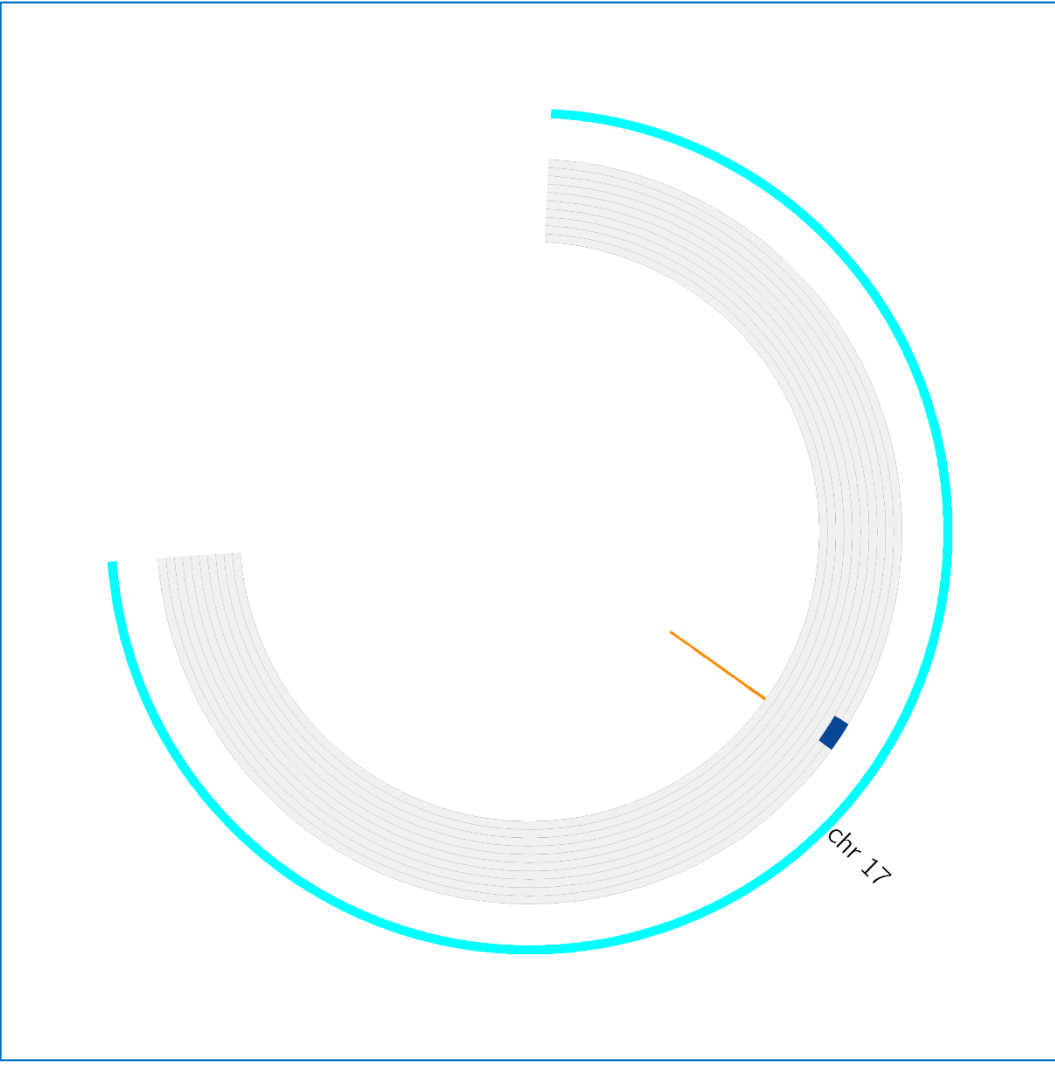

FAST – ERBB2 amplicon

p-16

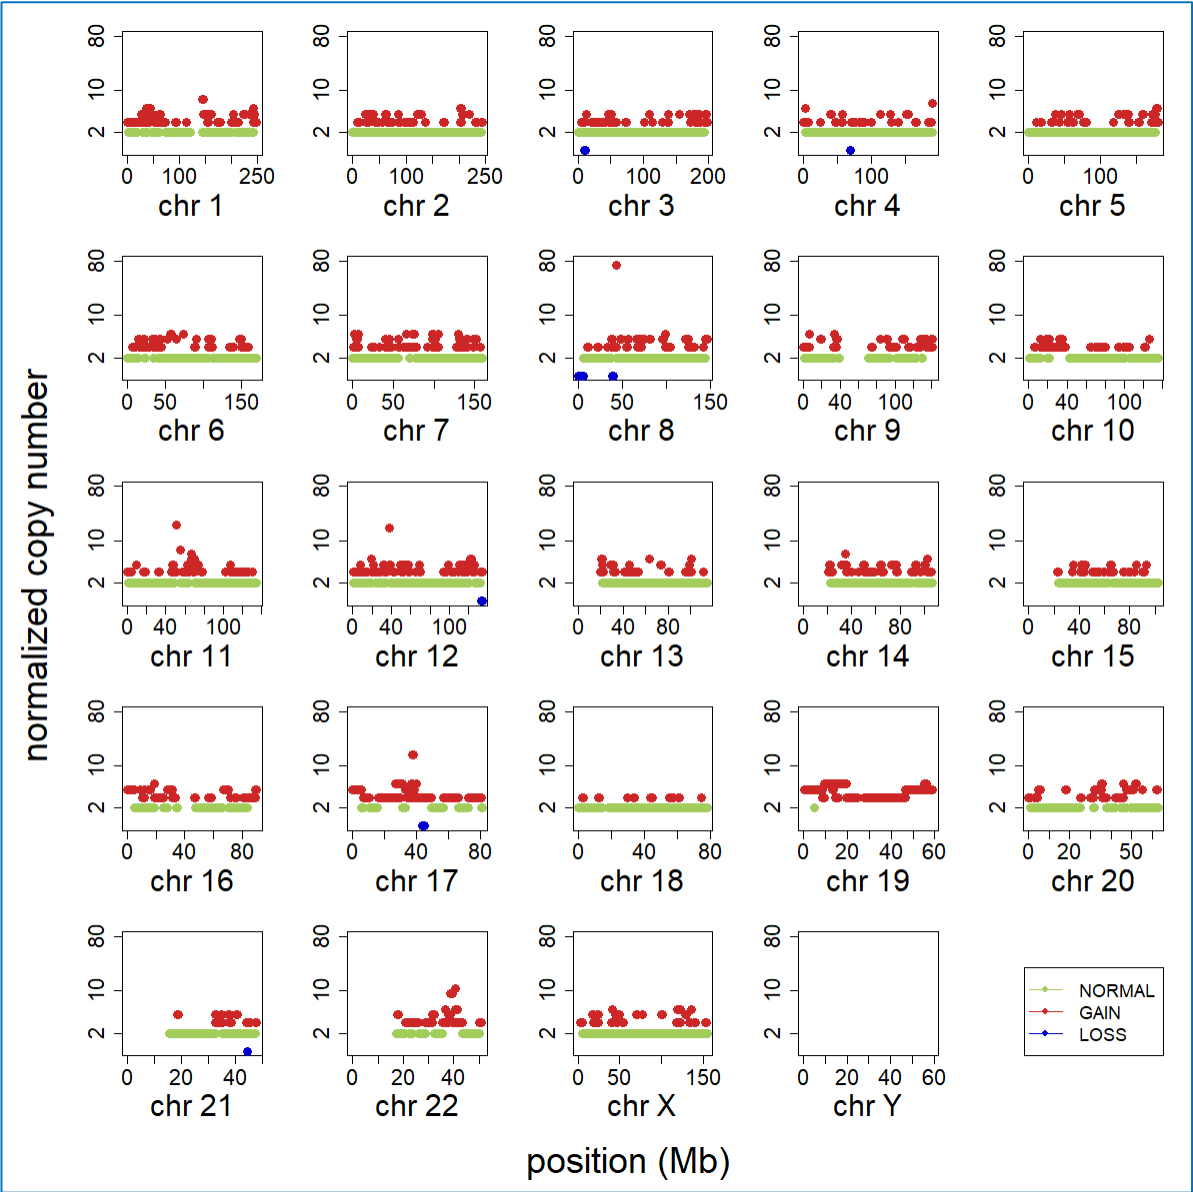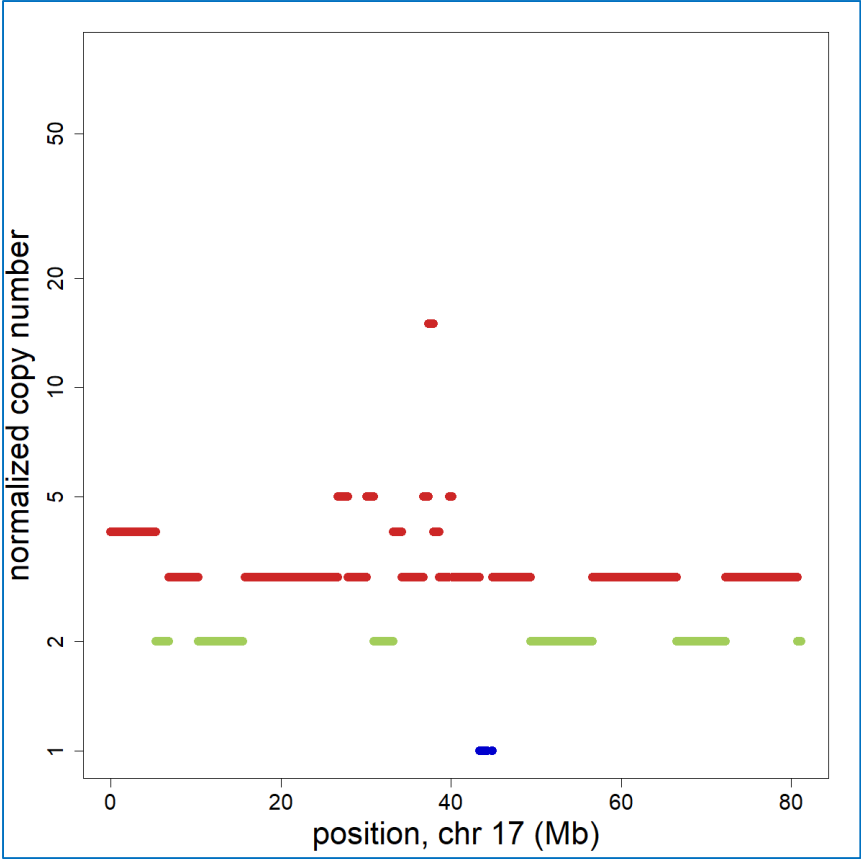

Control-FREEC

p-16



BreakDancer + Control-FREEC

No FAST data for this sample

FAST – Whole Genome

m-16

No FAST data for this sample

FAST – ERBB2 amplicon

p-17

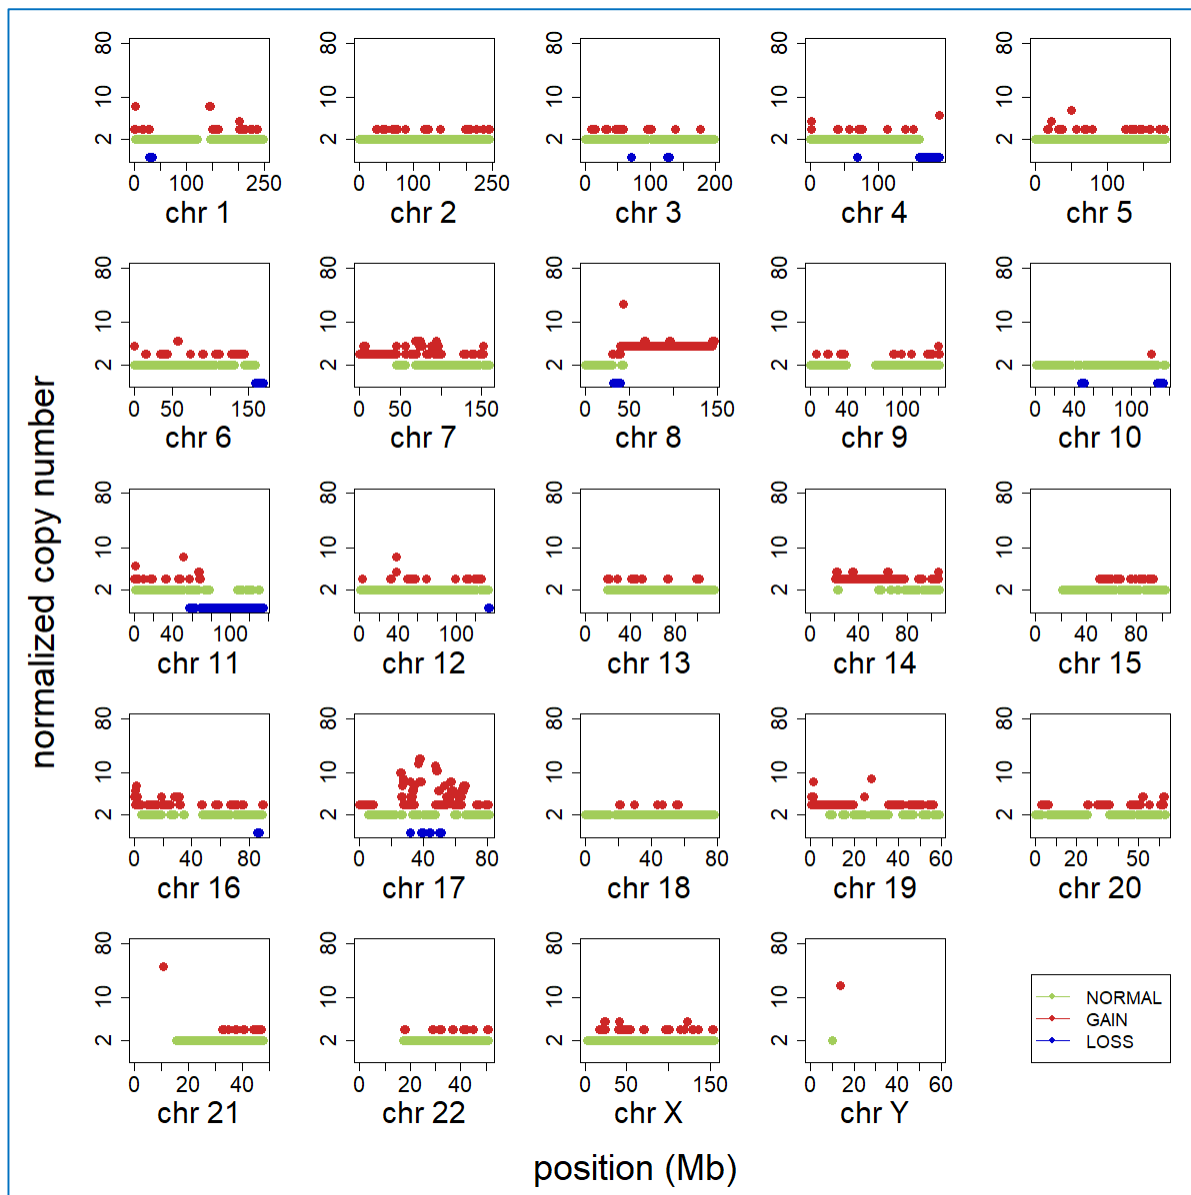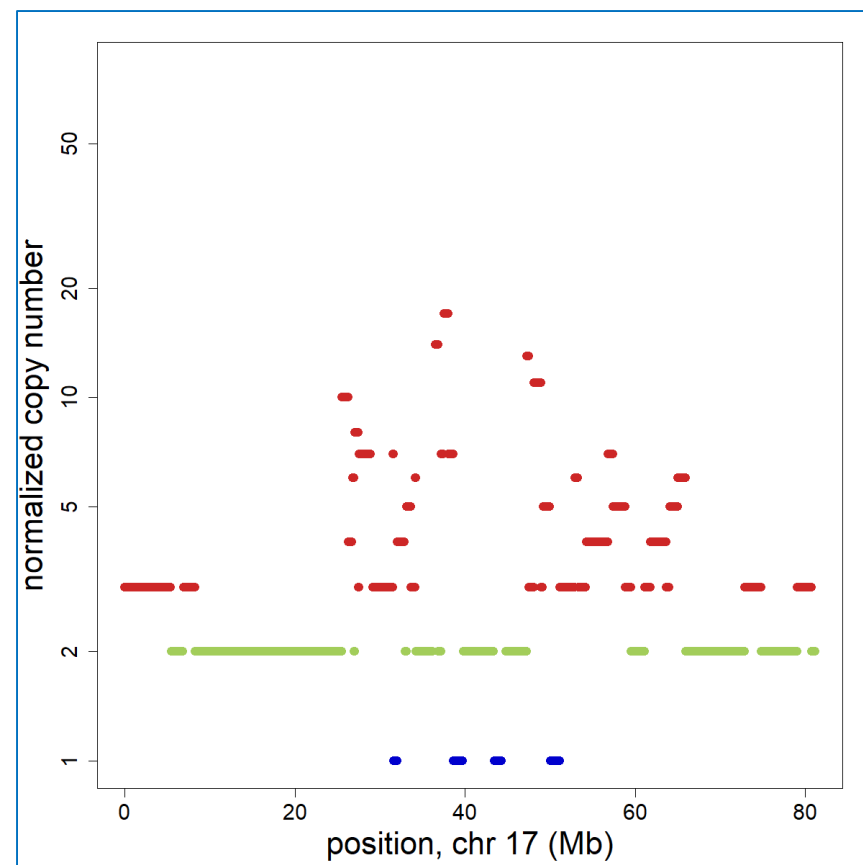

Control-FREEC

p-17

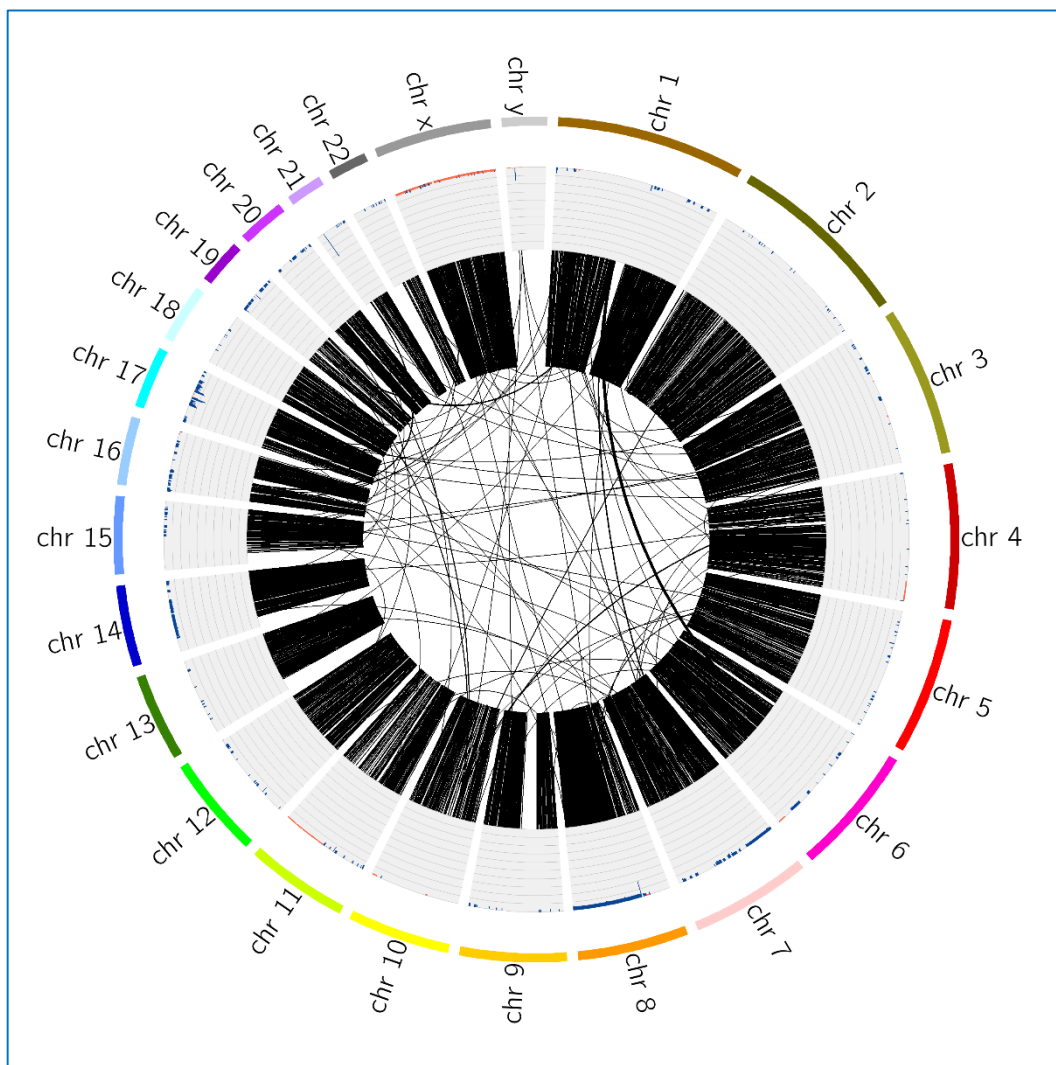

BreakDancer + Control-FREEC

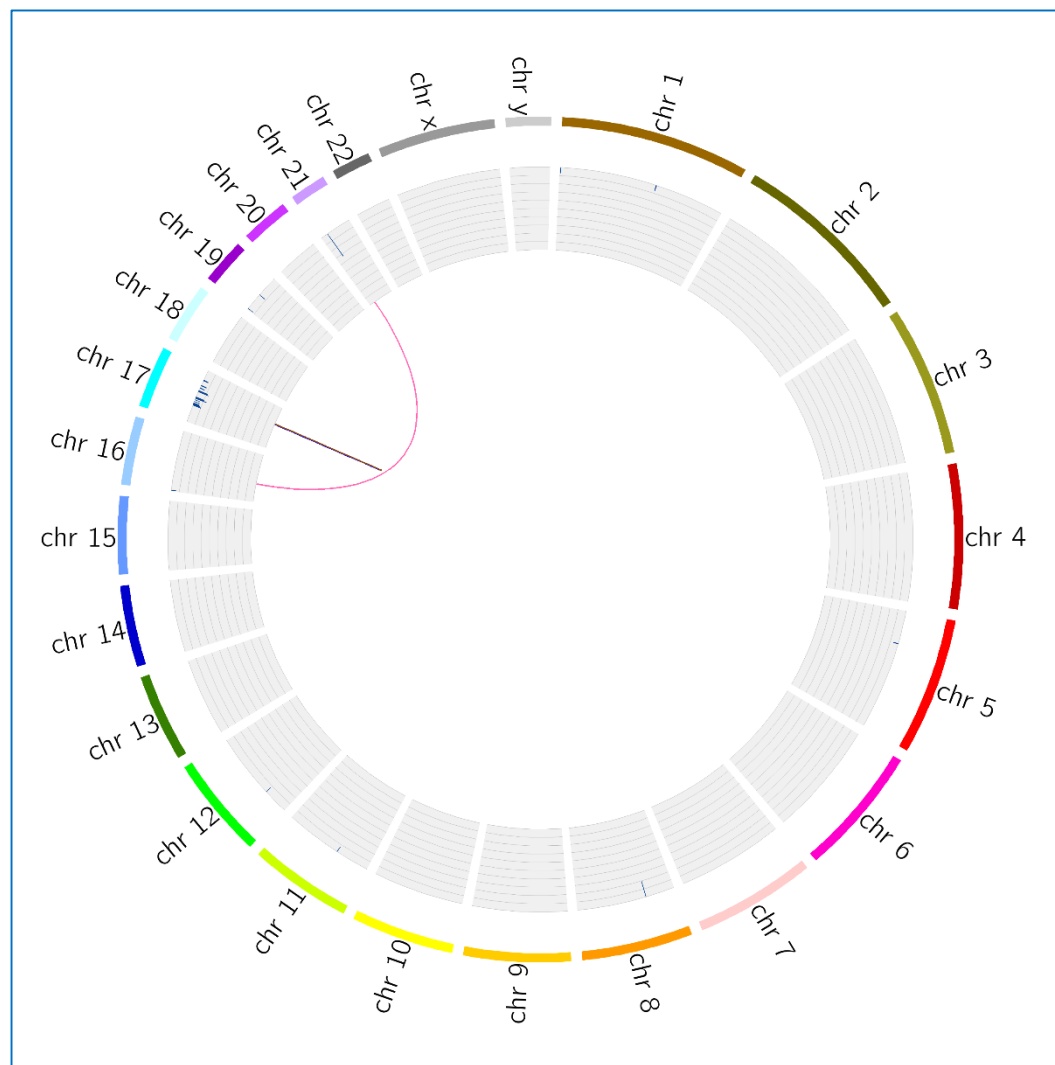

FAST - Whole Genome

p-17

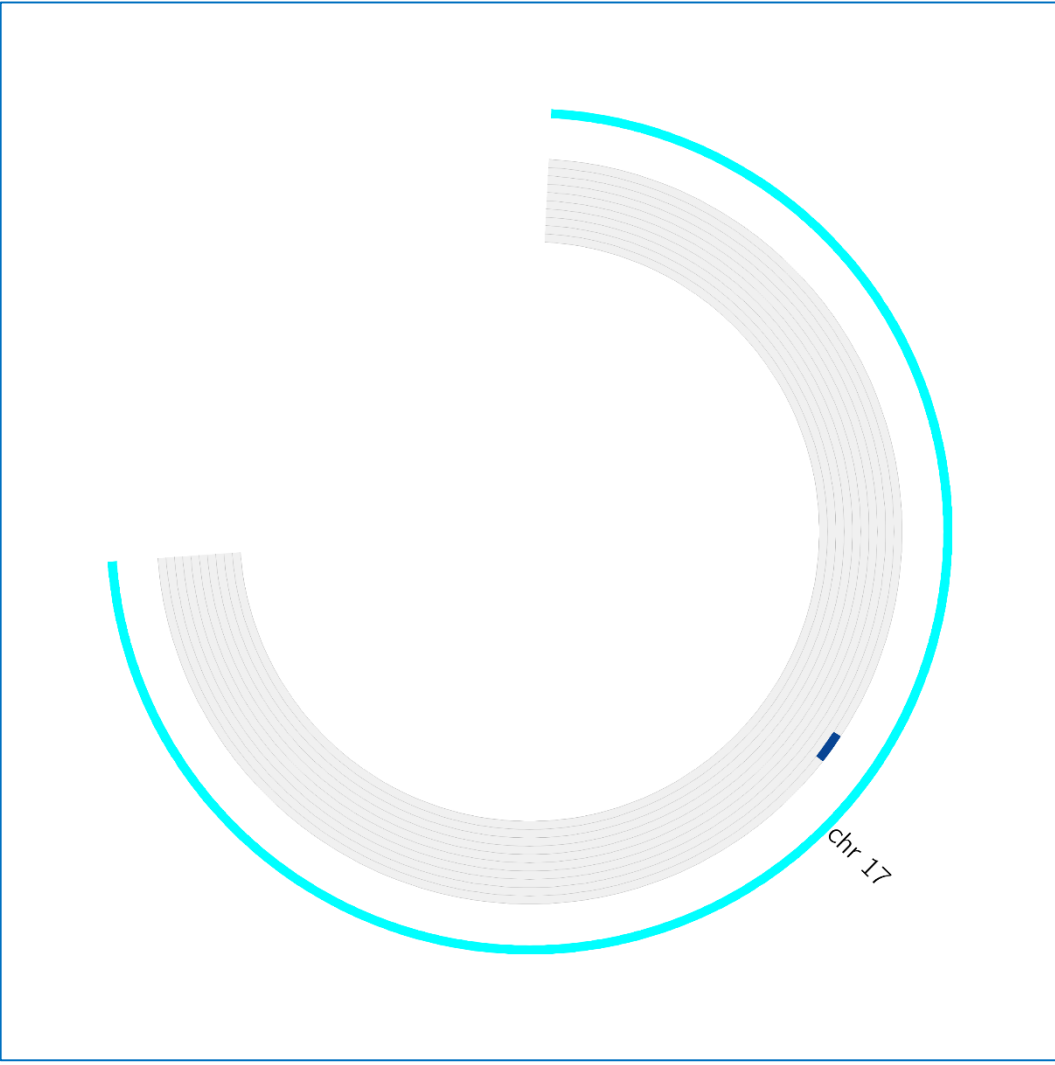

FAST – ERBB2 amplicon



p-20

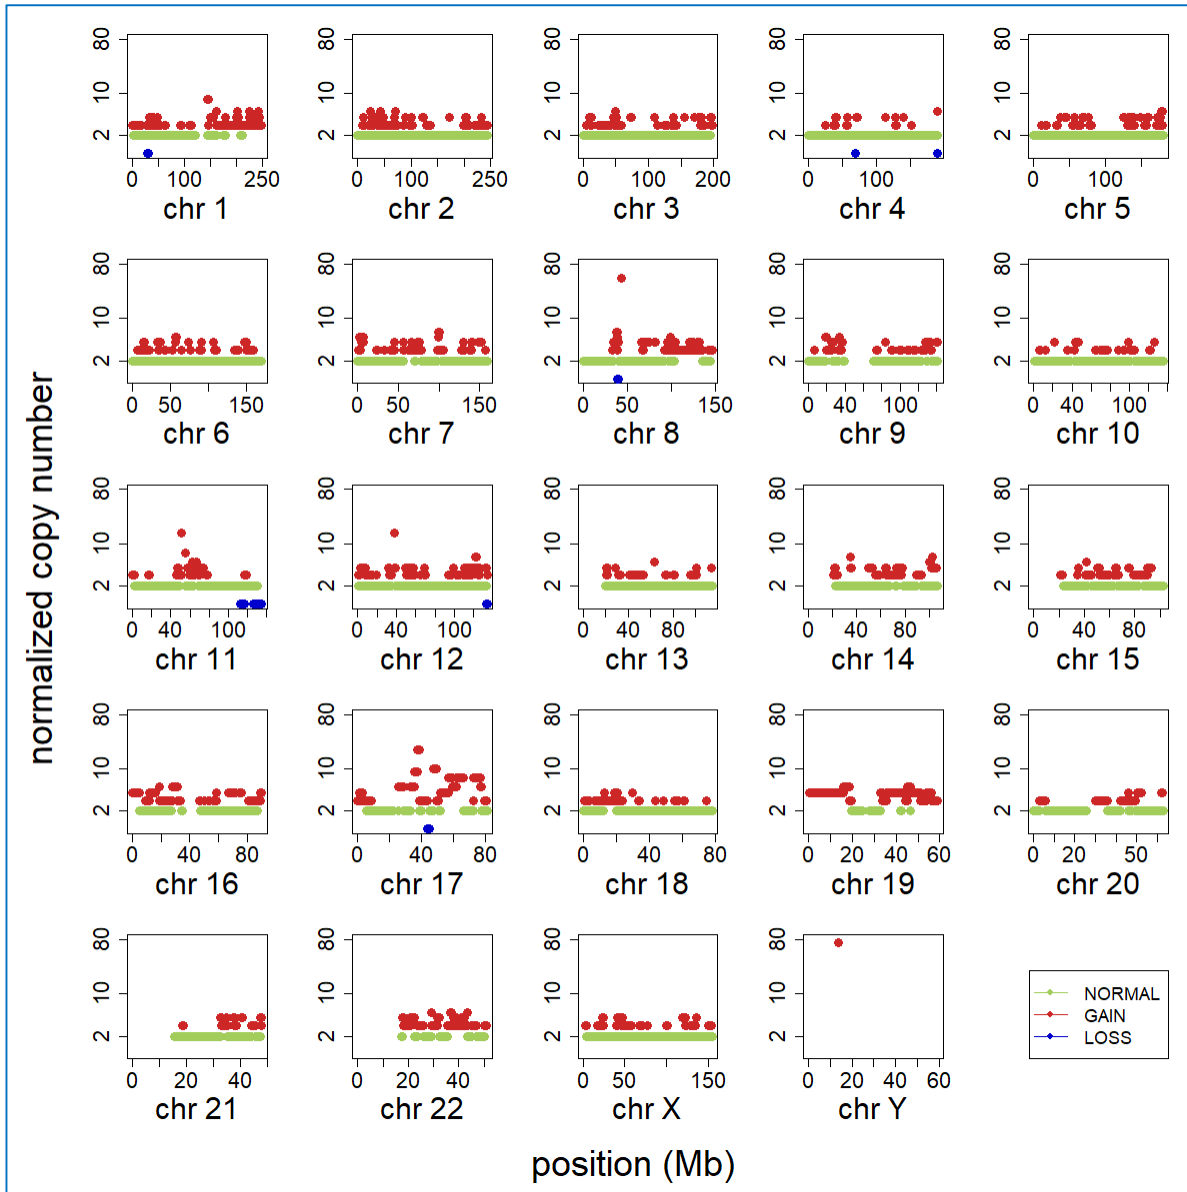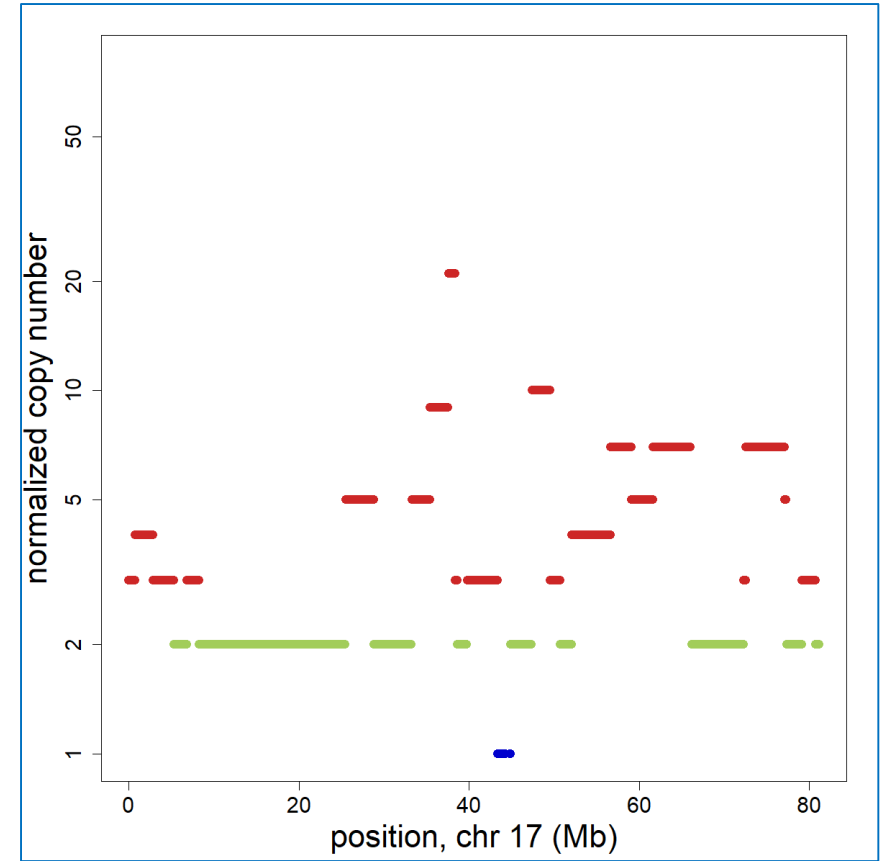

Control-FREEC

p-20

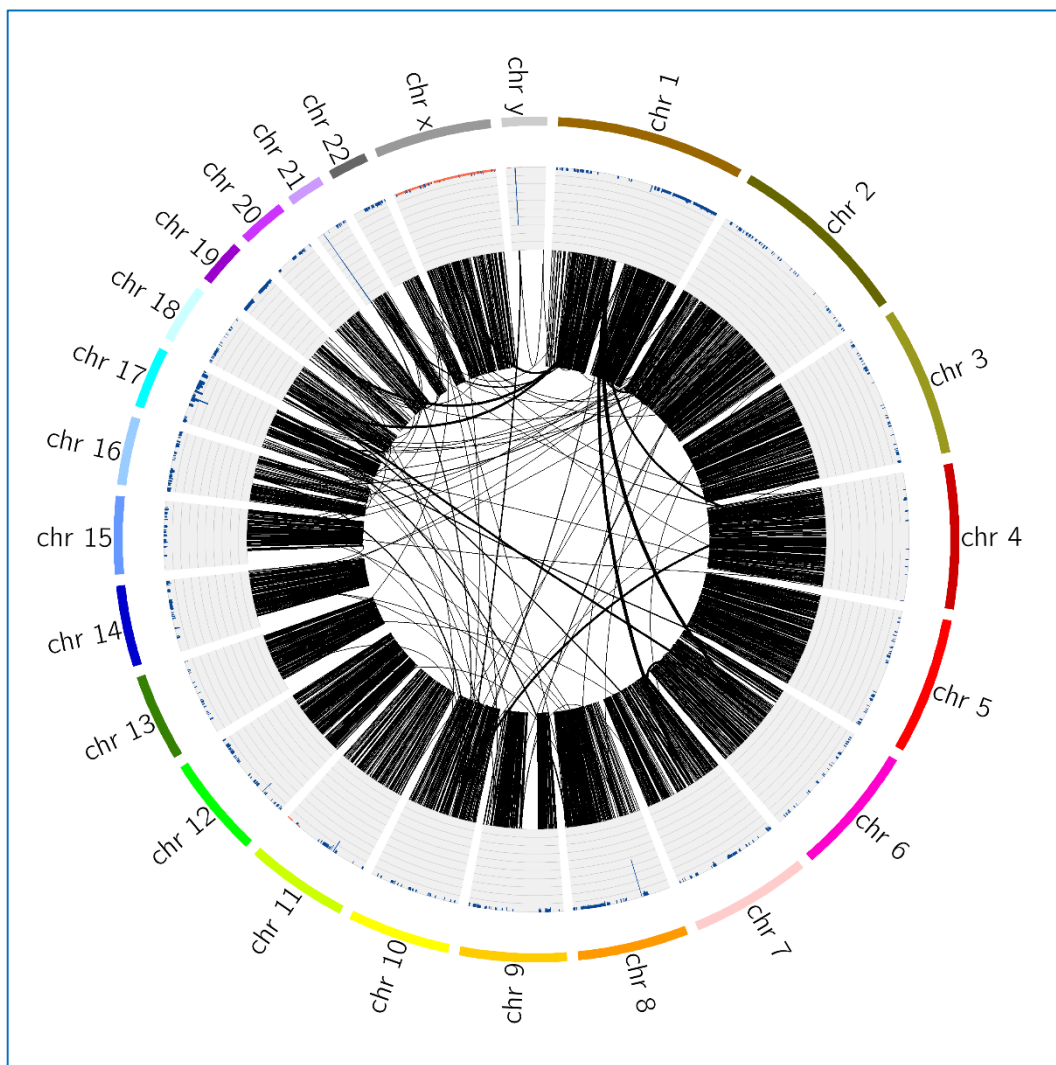

BreakDancer + Control-FREEC

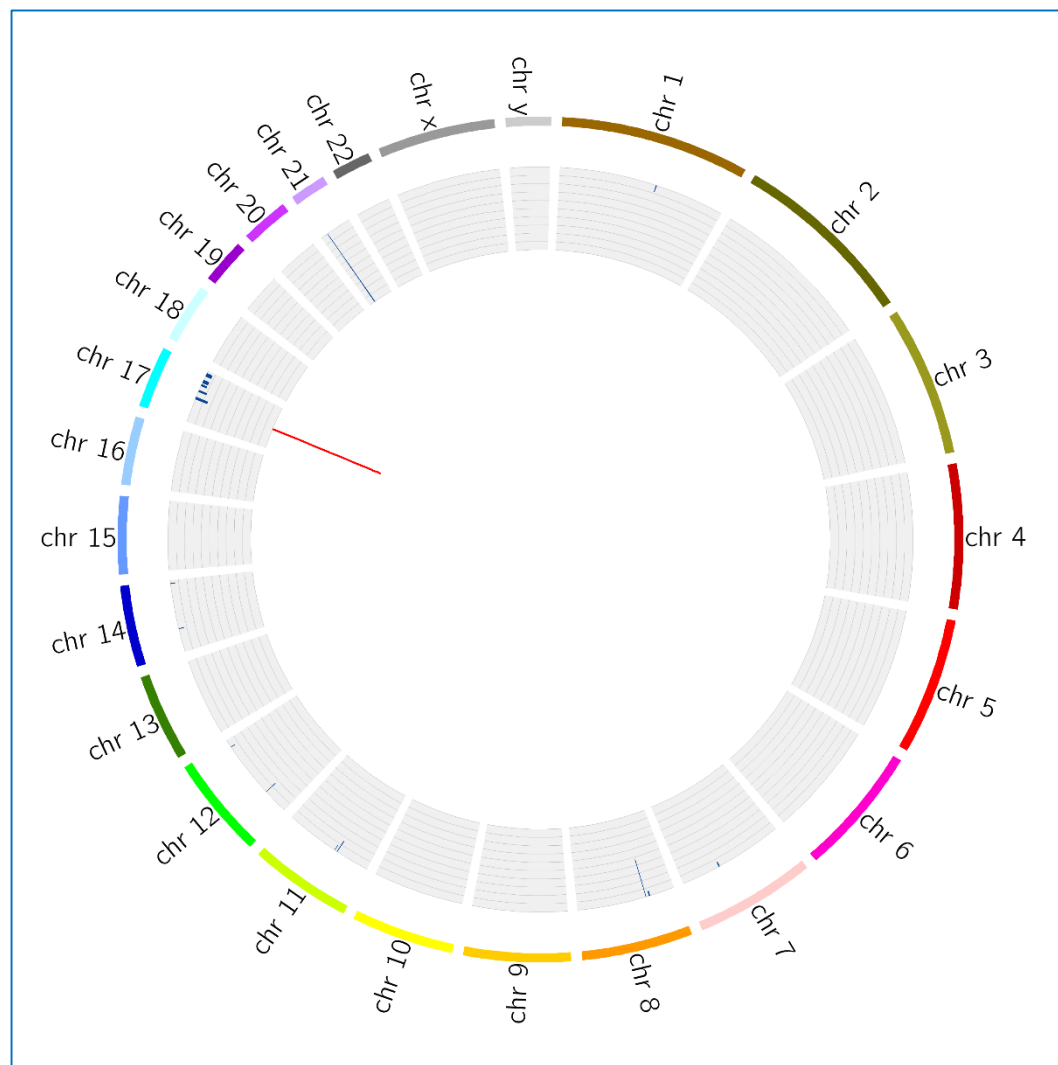

FAST – Whole Genome

p-20

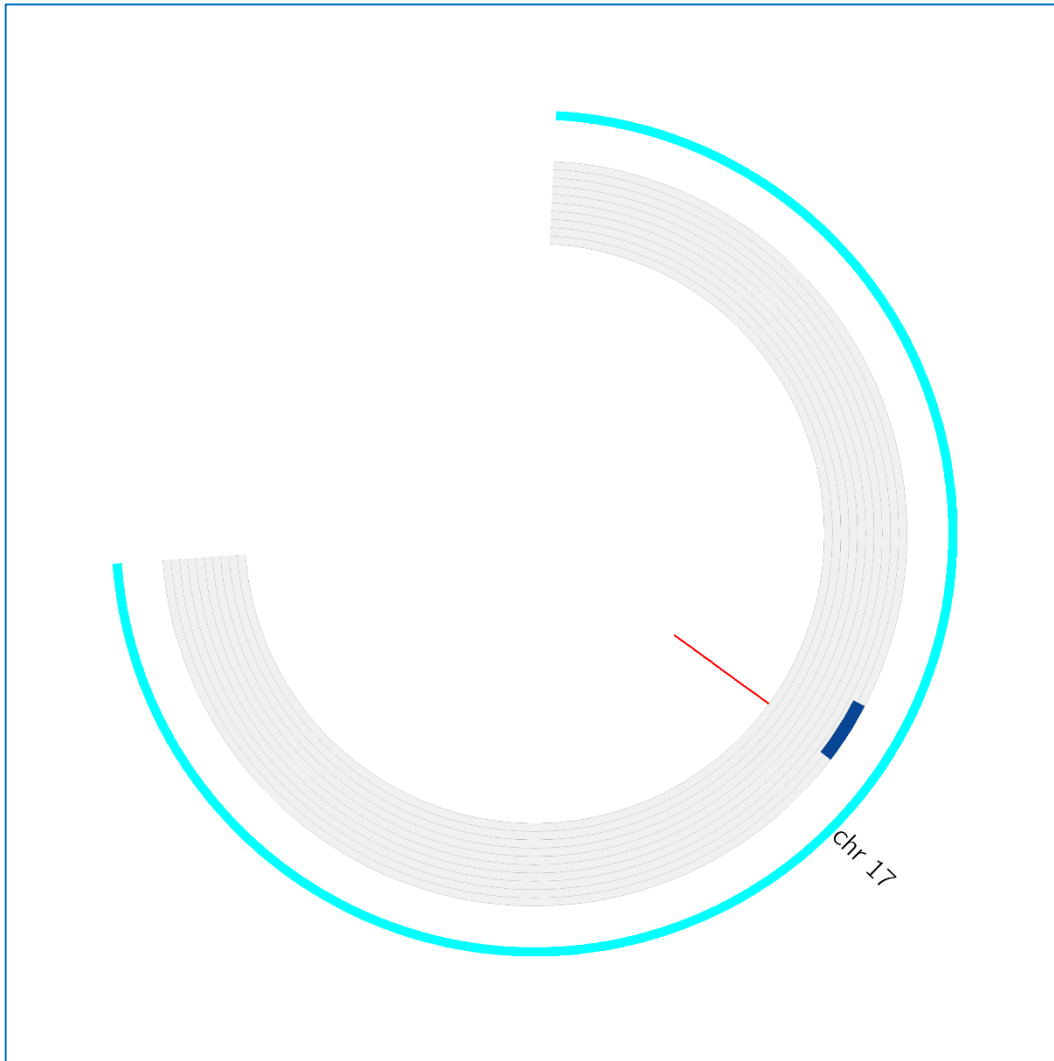

FAST – ERBB2 amplicon

p-21

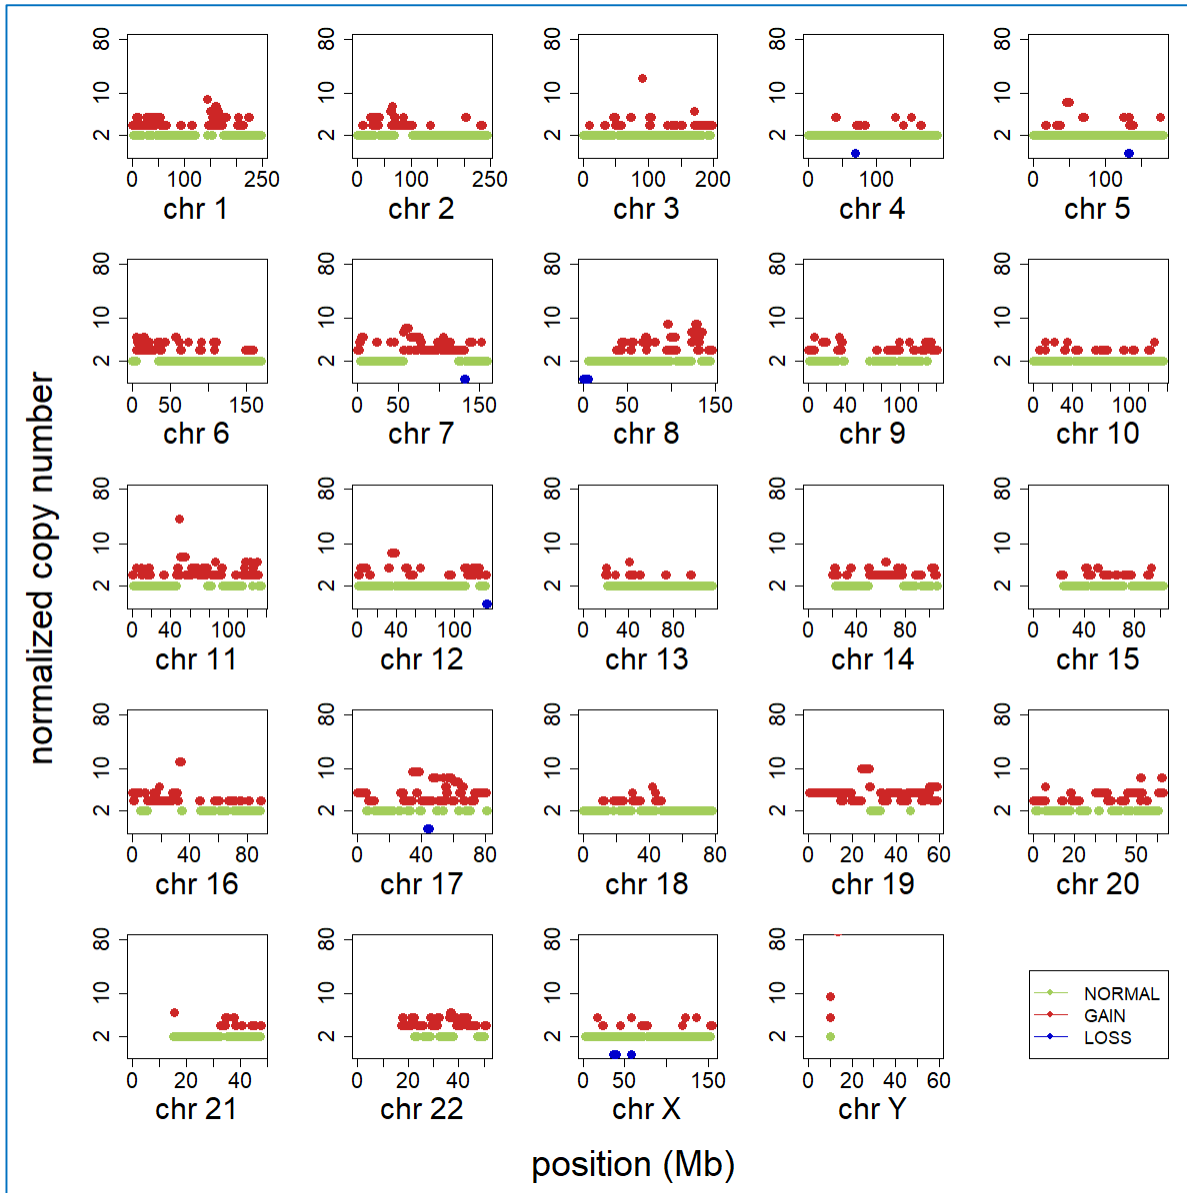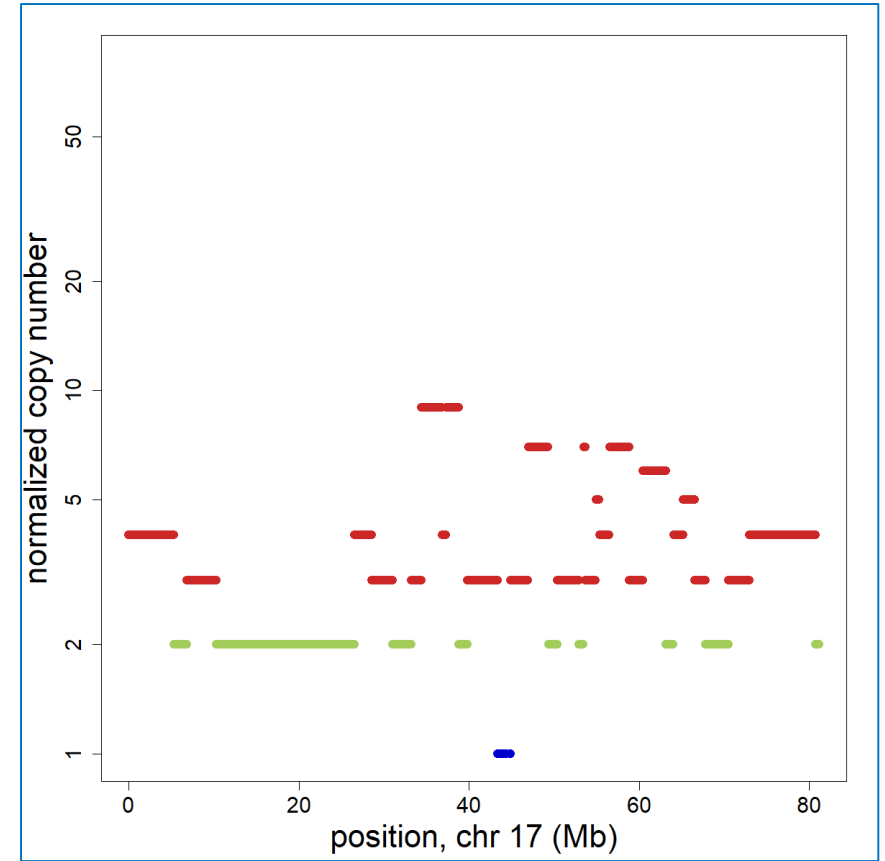

Control-FREEC

p-21

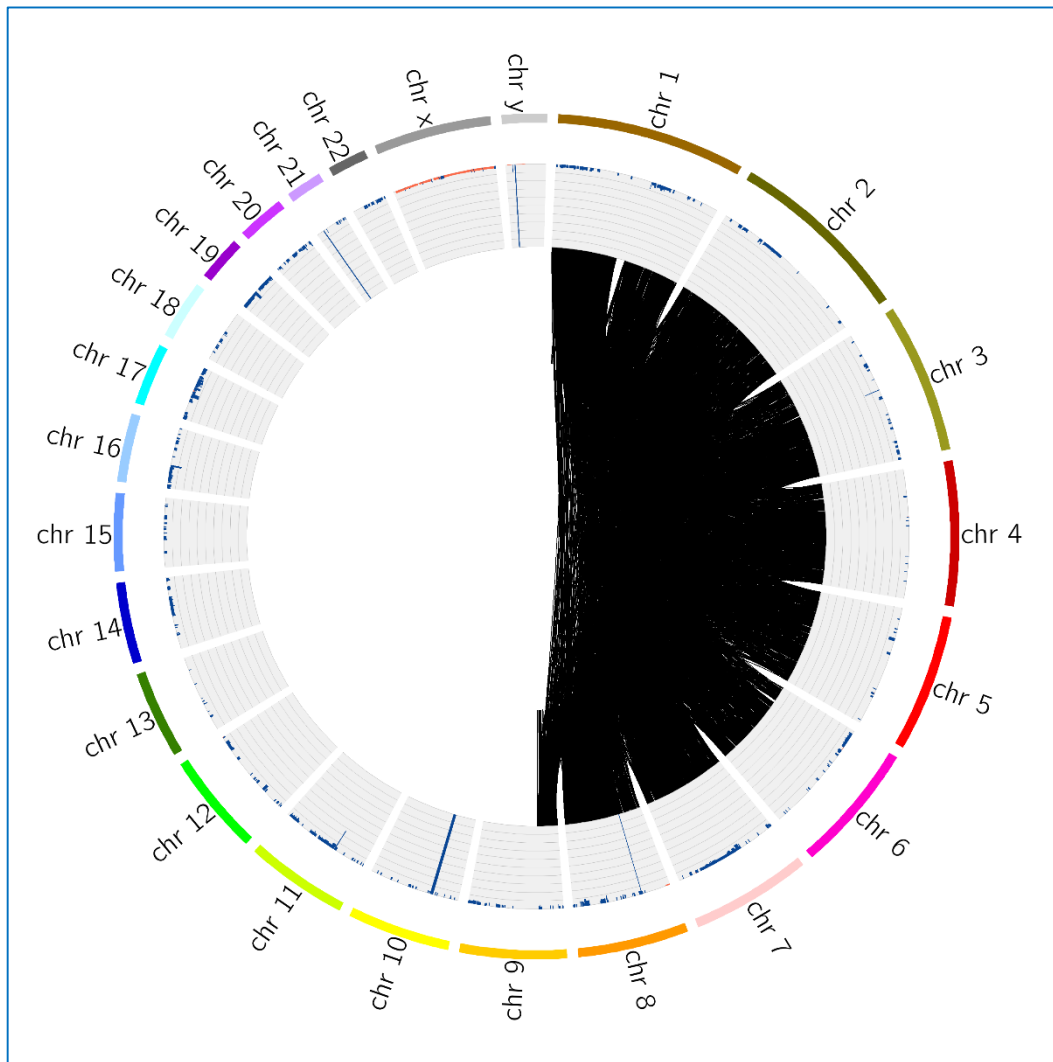

BreakDancer + Control-FREEC

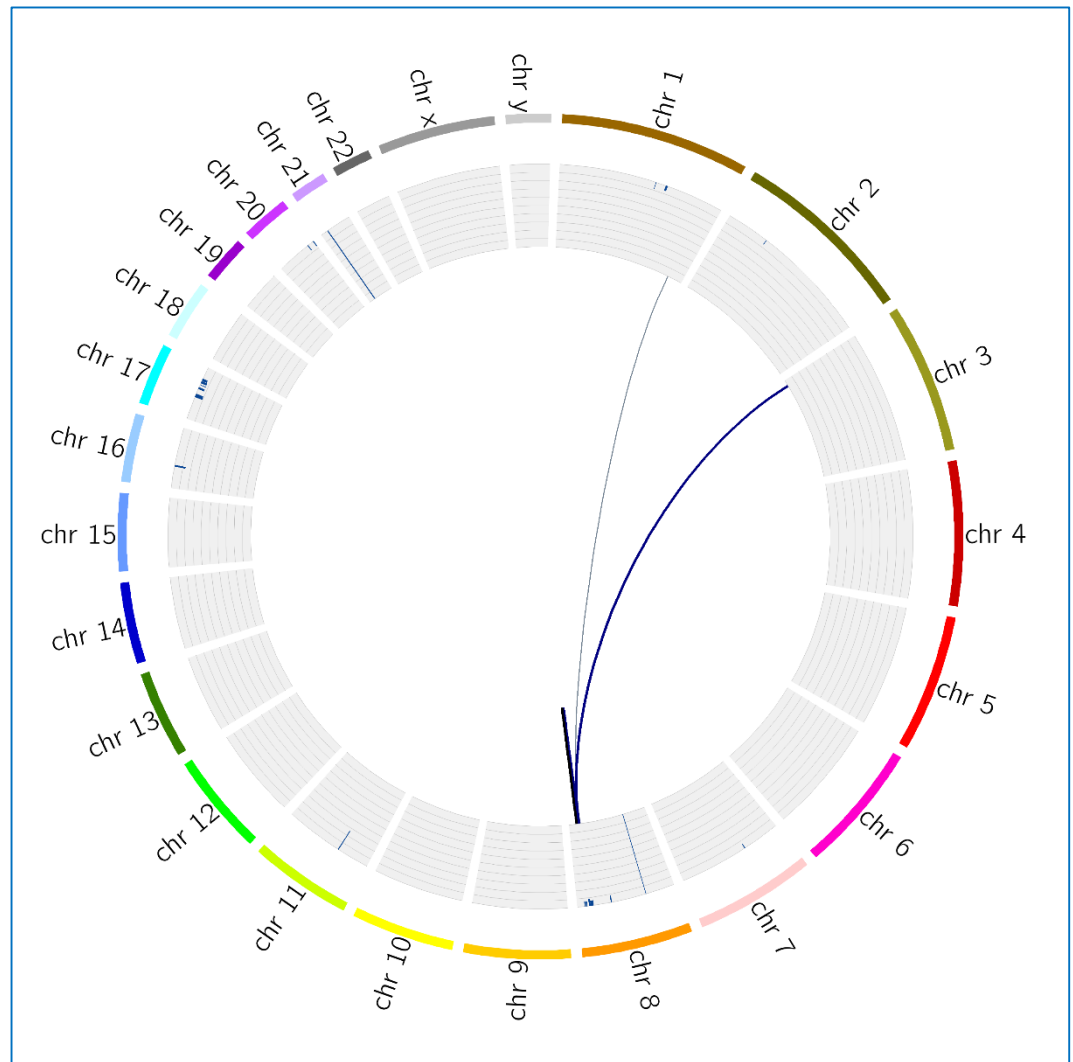

FAST – Whole Genome

p-21

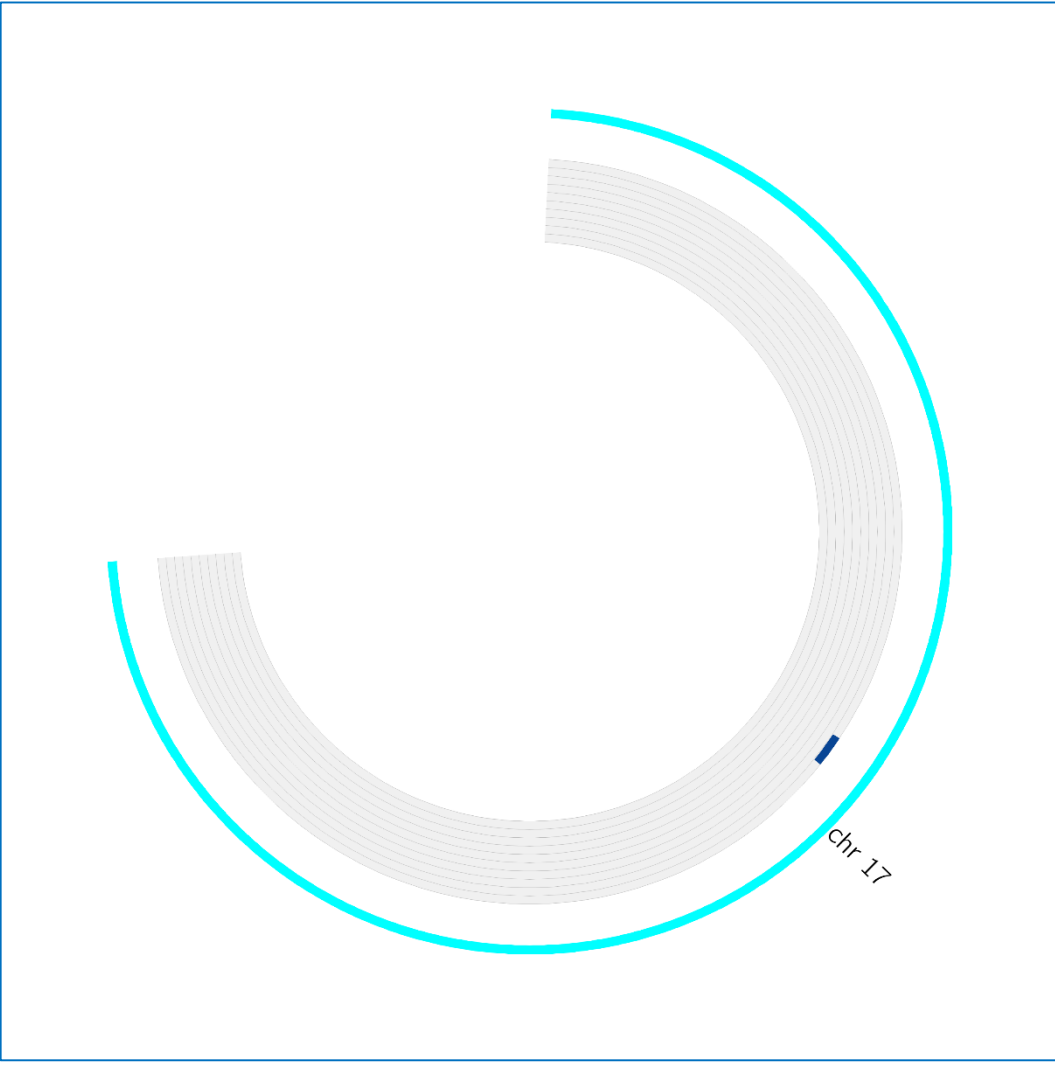

FAST – ERBB2 amplicon

p-22

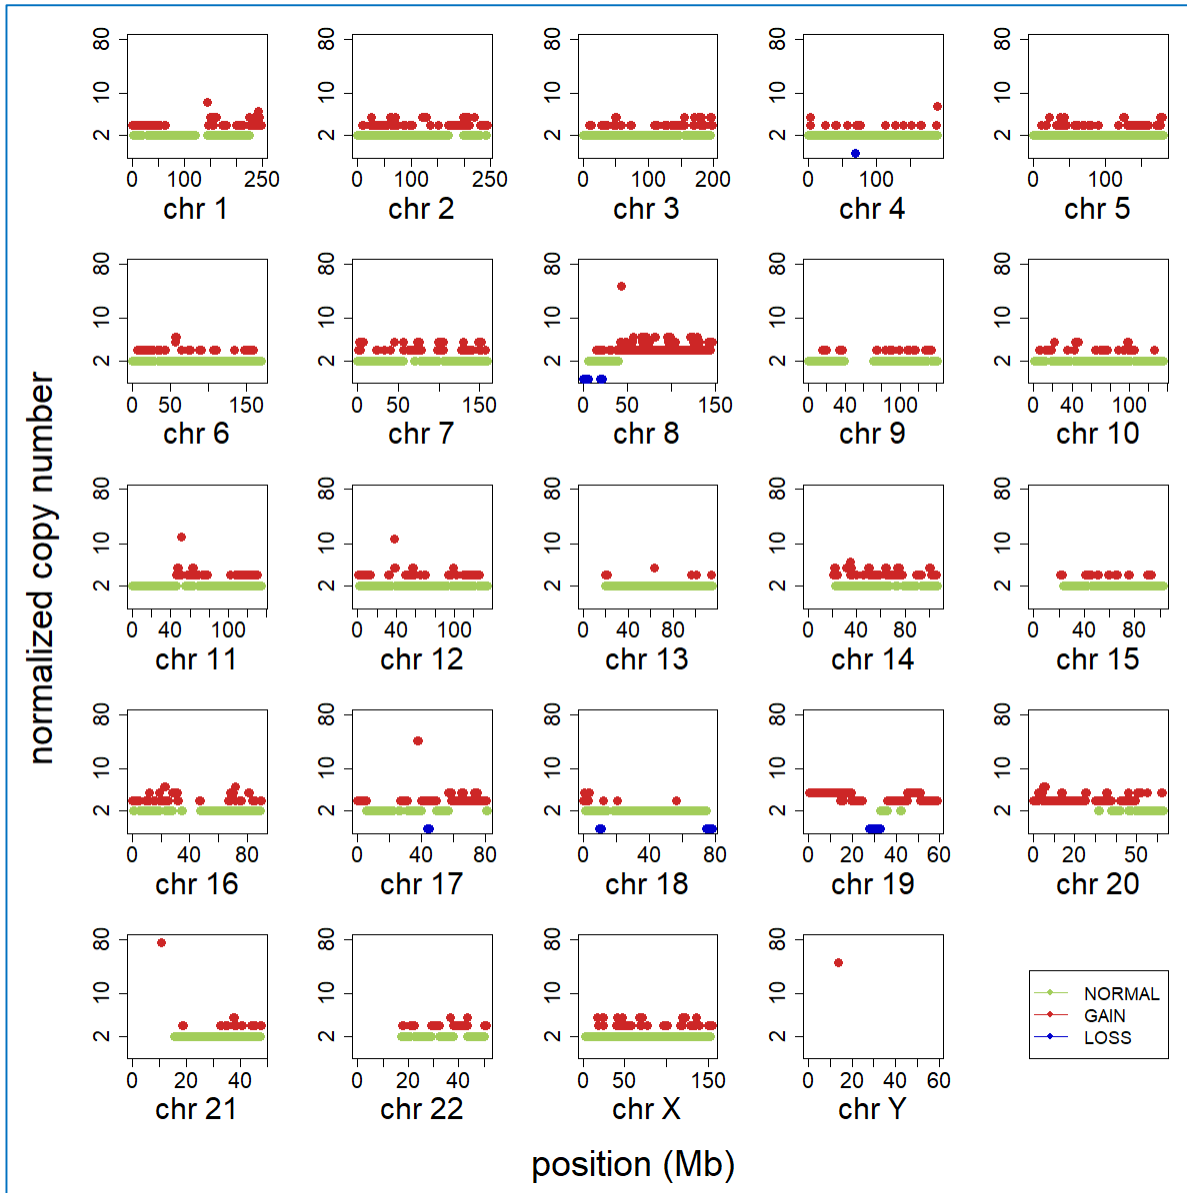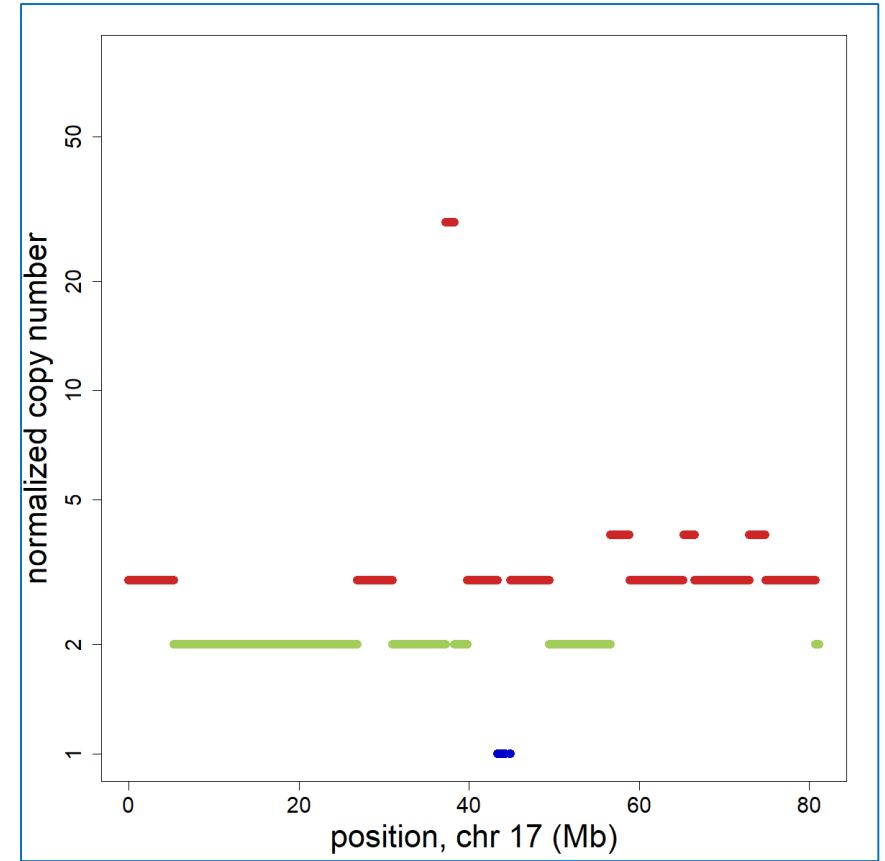

Control-FREEC

p-22

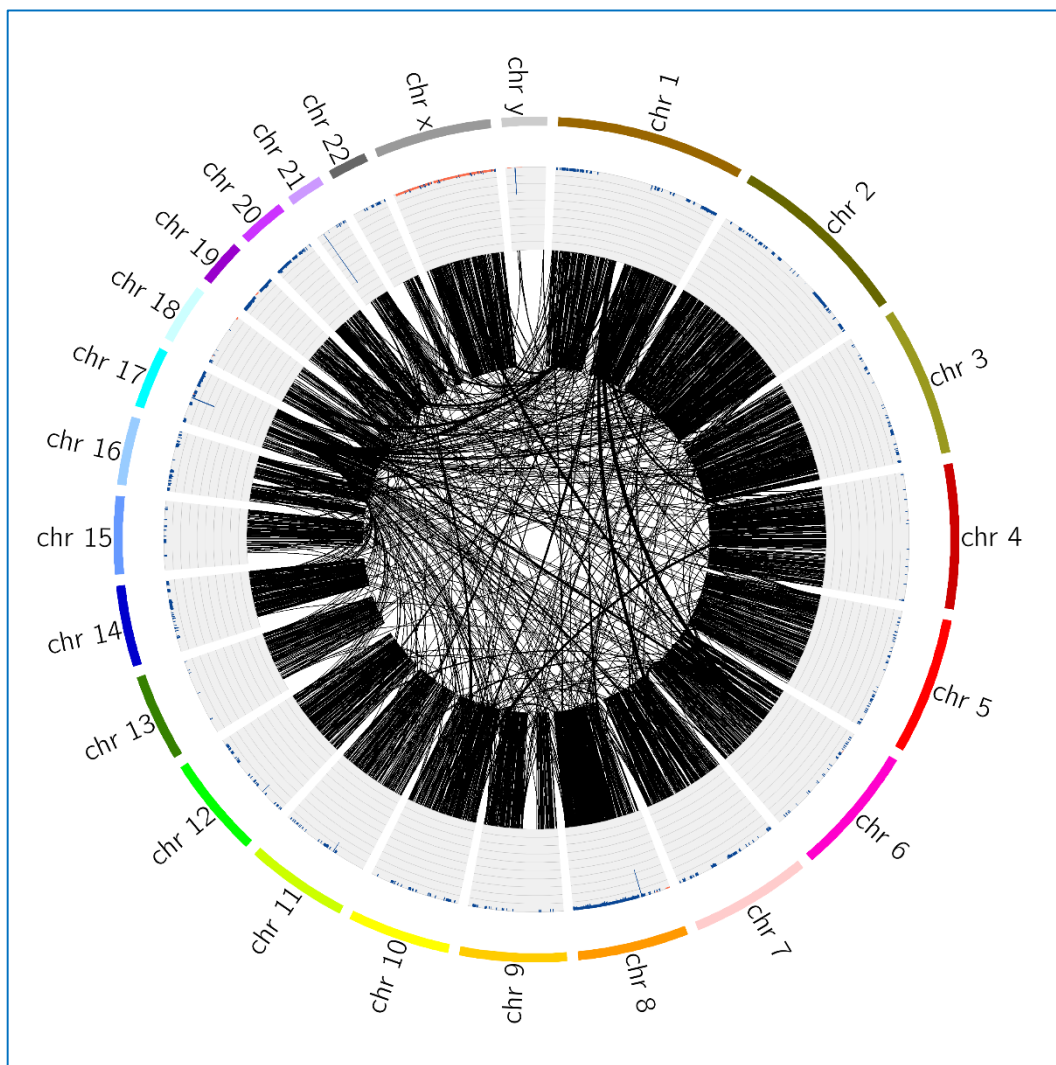

BreakDancer + Control-FREEC

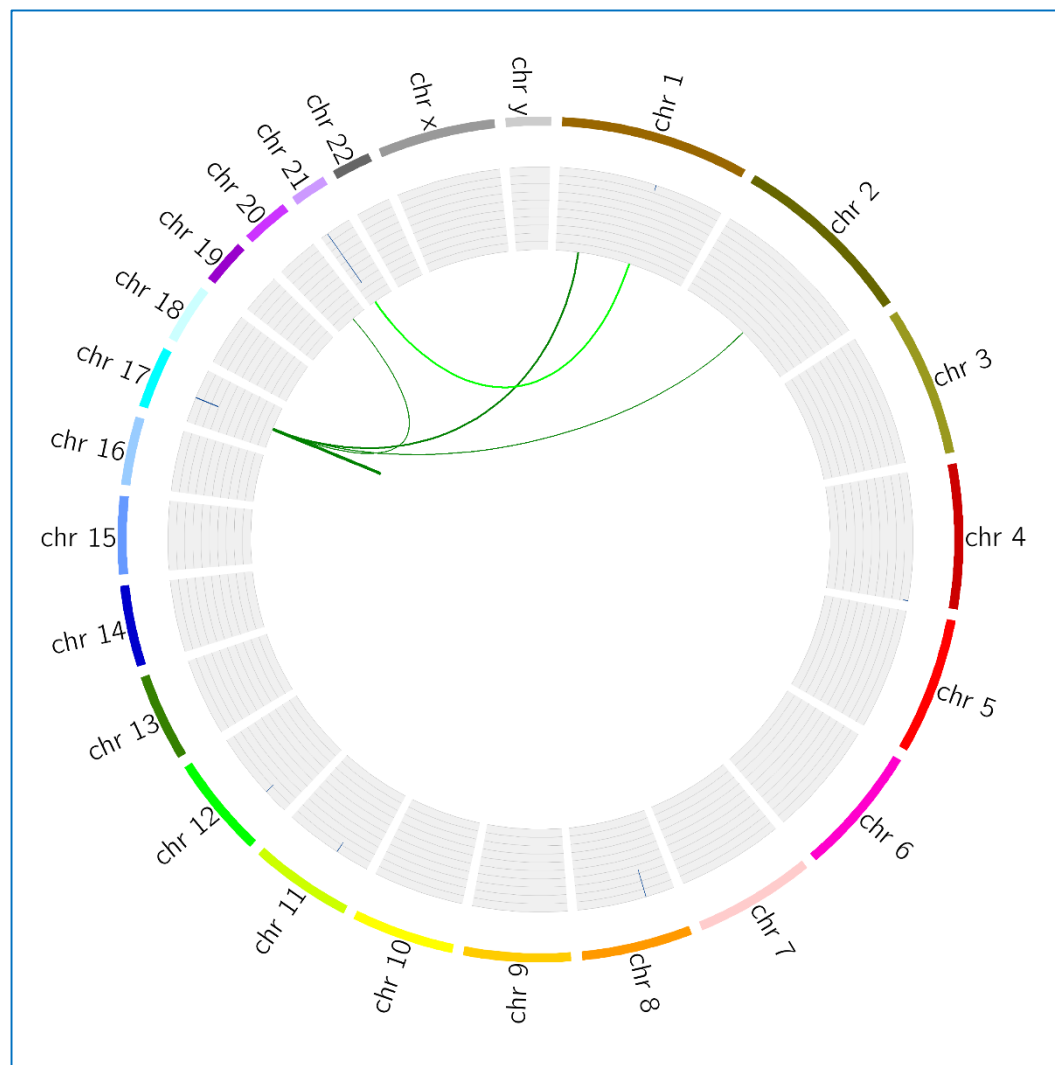

FAST – Whole Genome



p-22

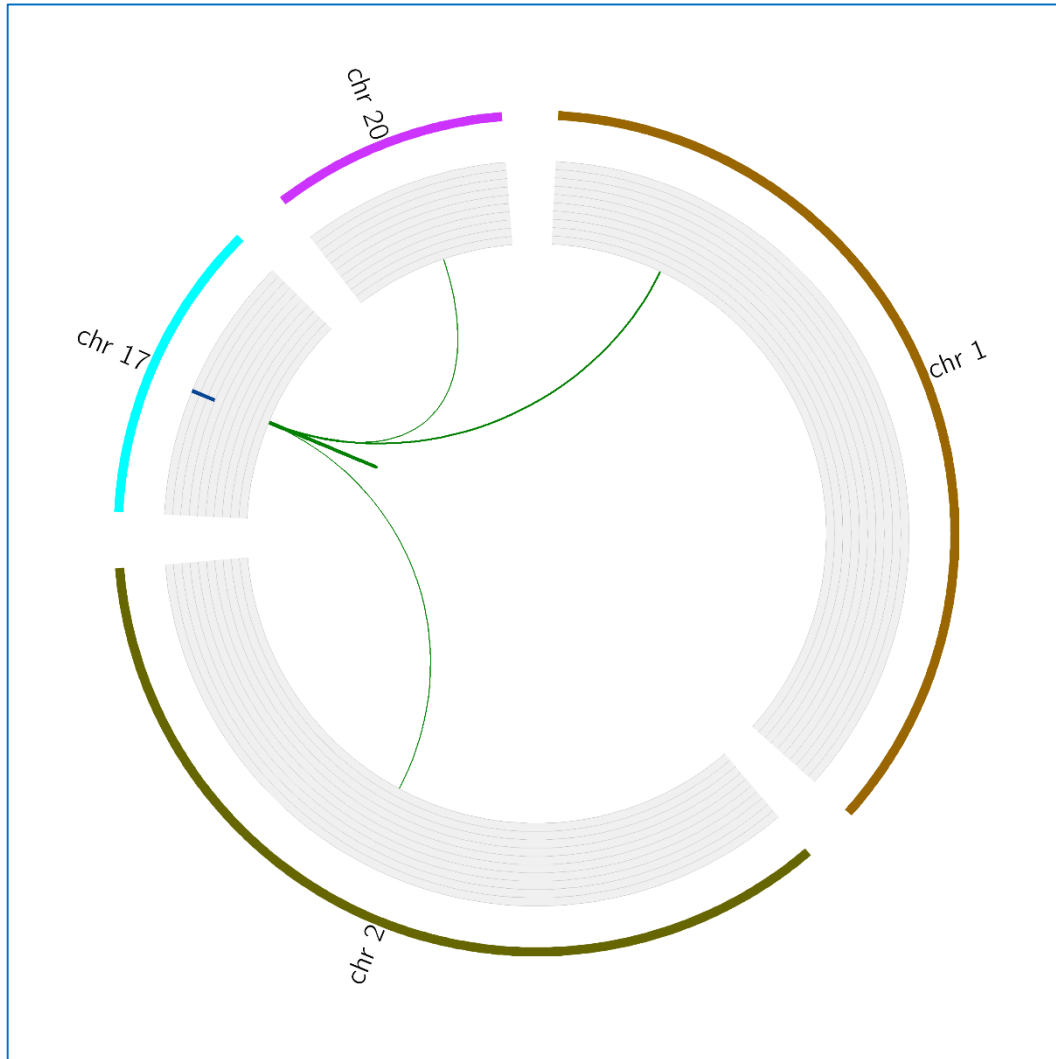

FAST – ERBB2 amplicon

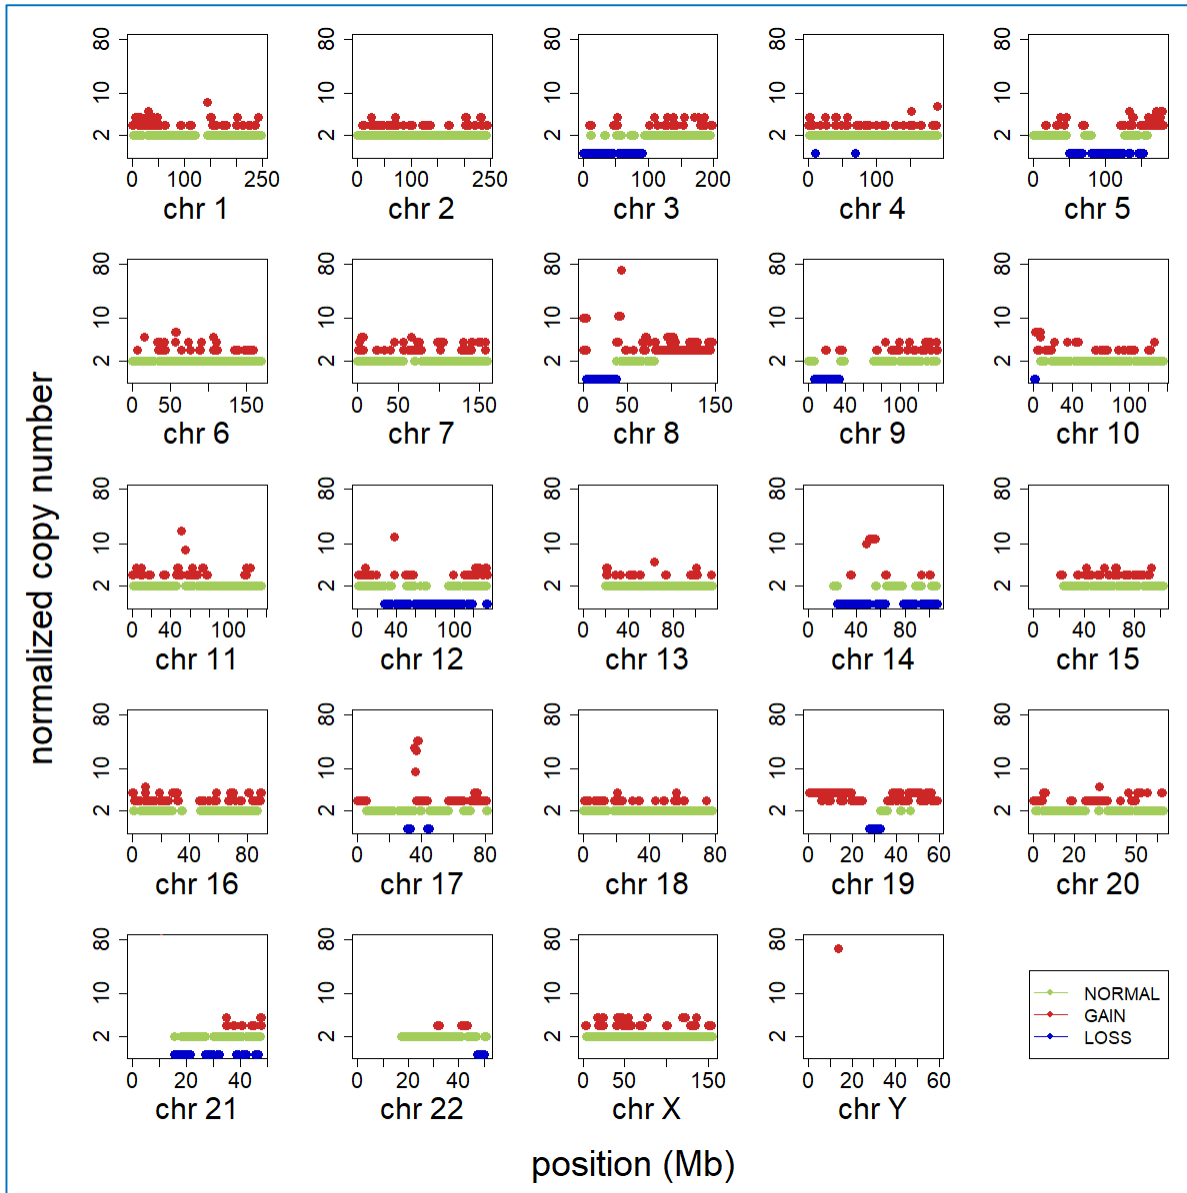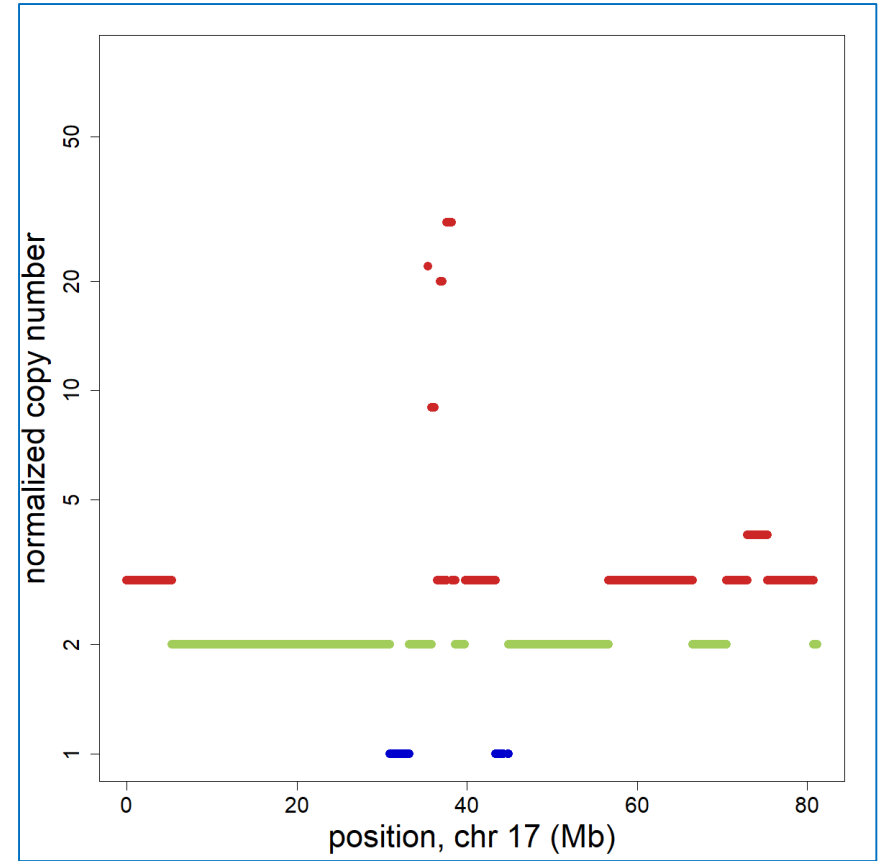

p-23

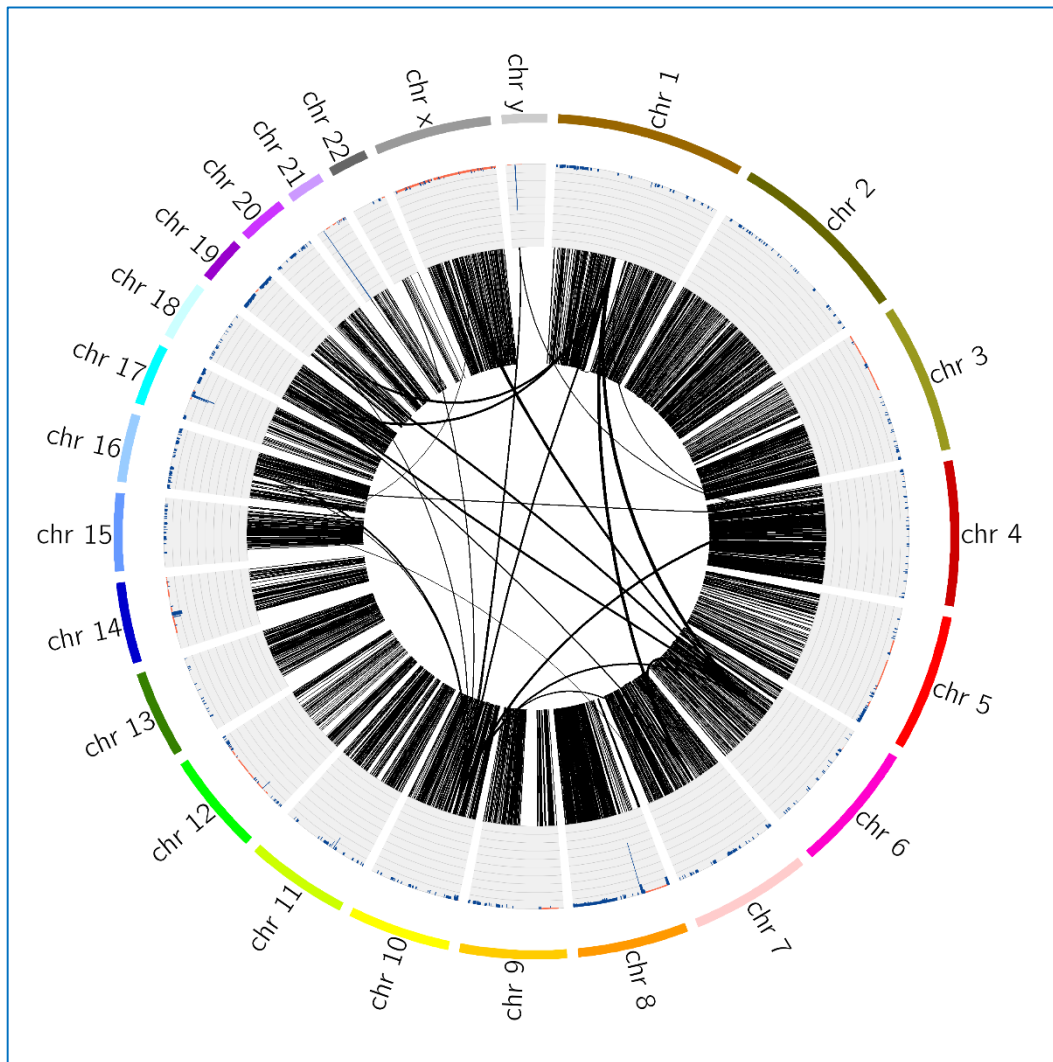

BreakDancer + Control-FREEC

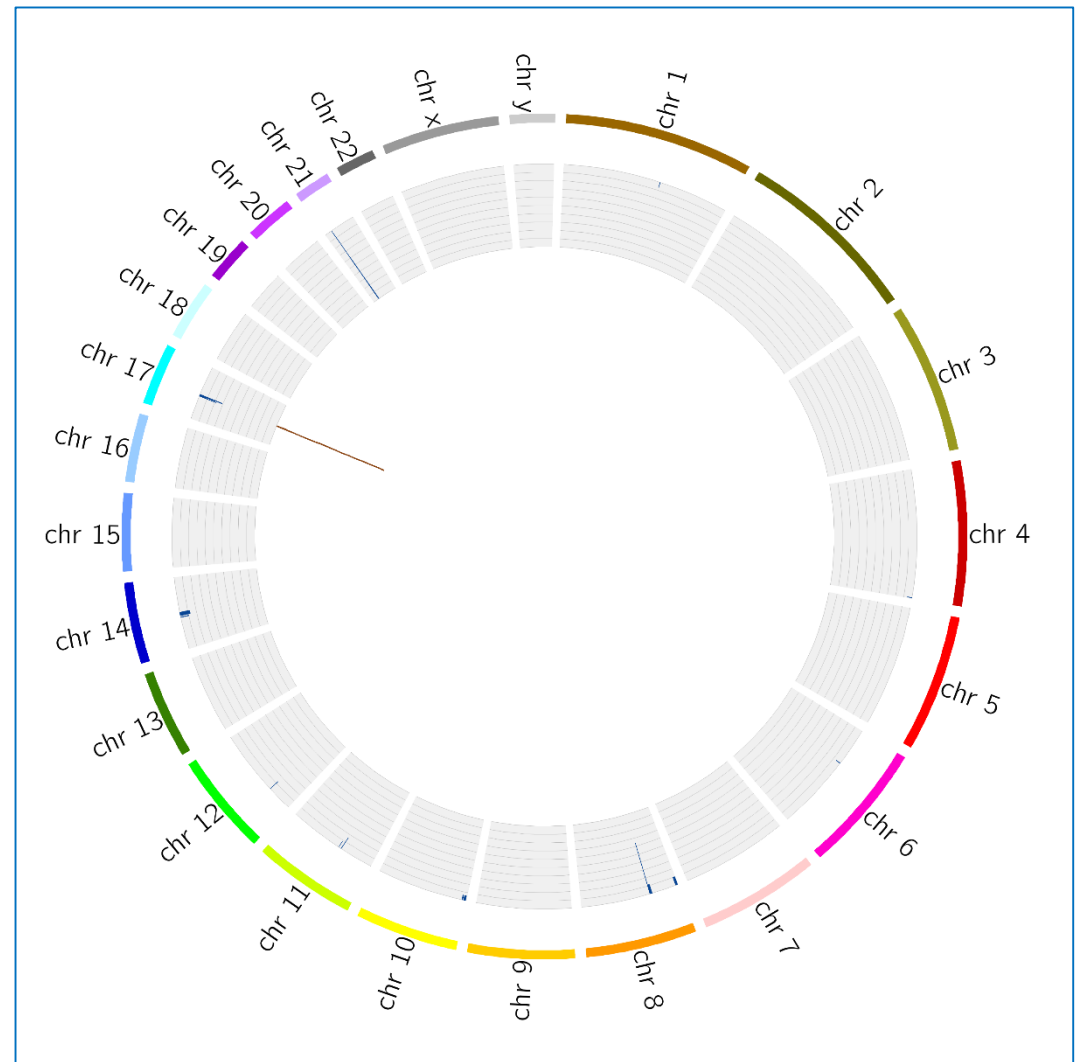

FAST – Whole Genome

p-23

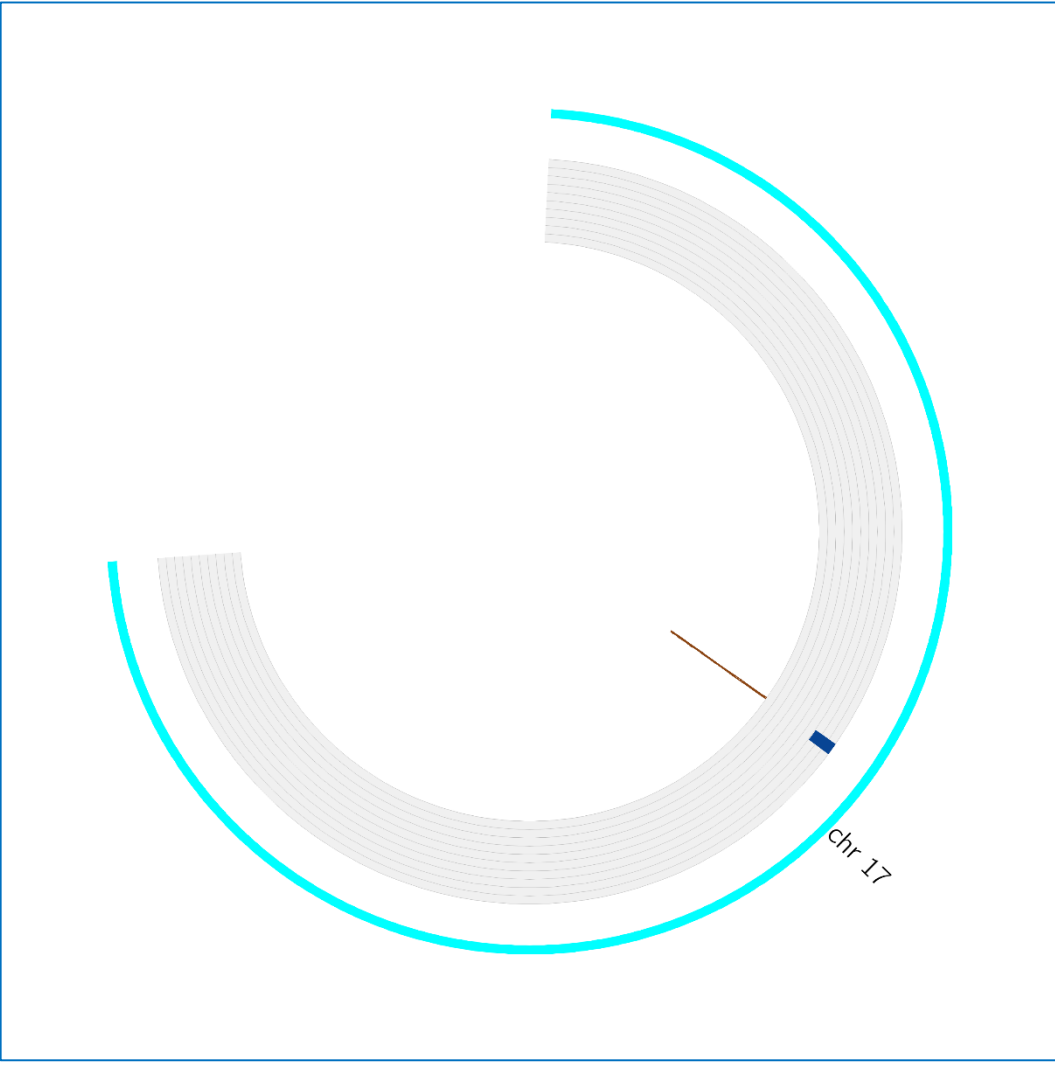

FAST – ERBB2 amplicon

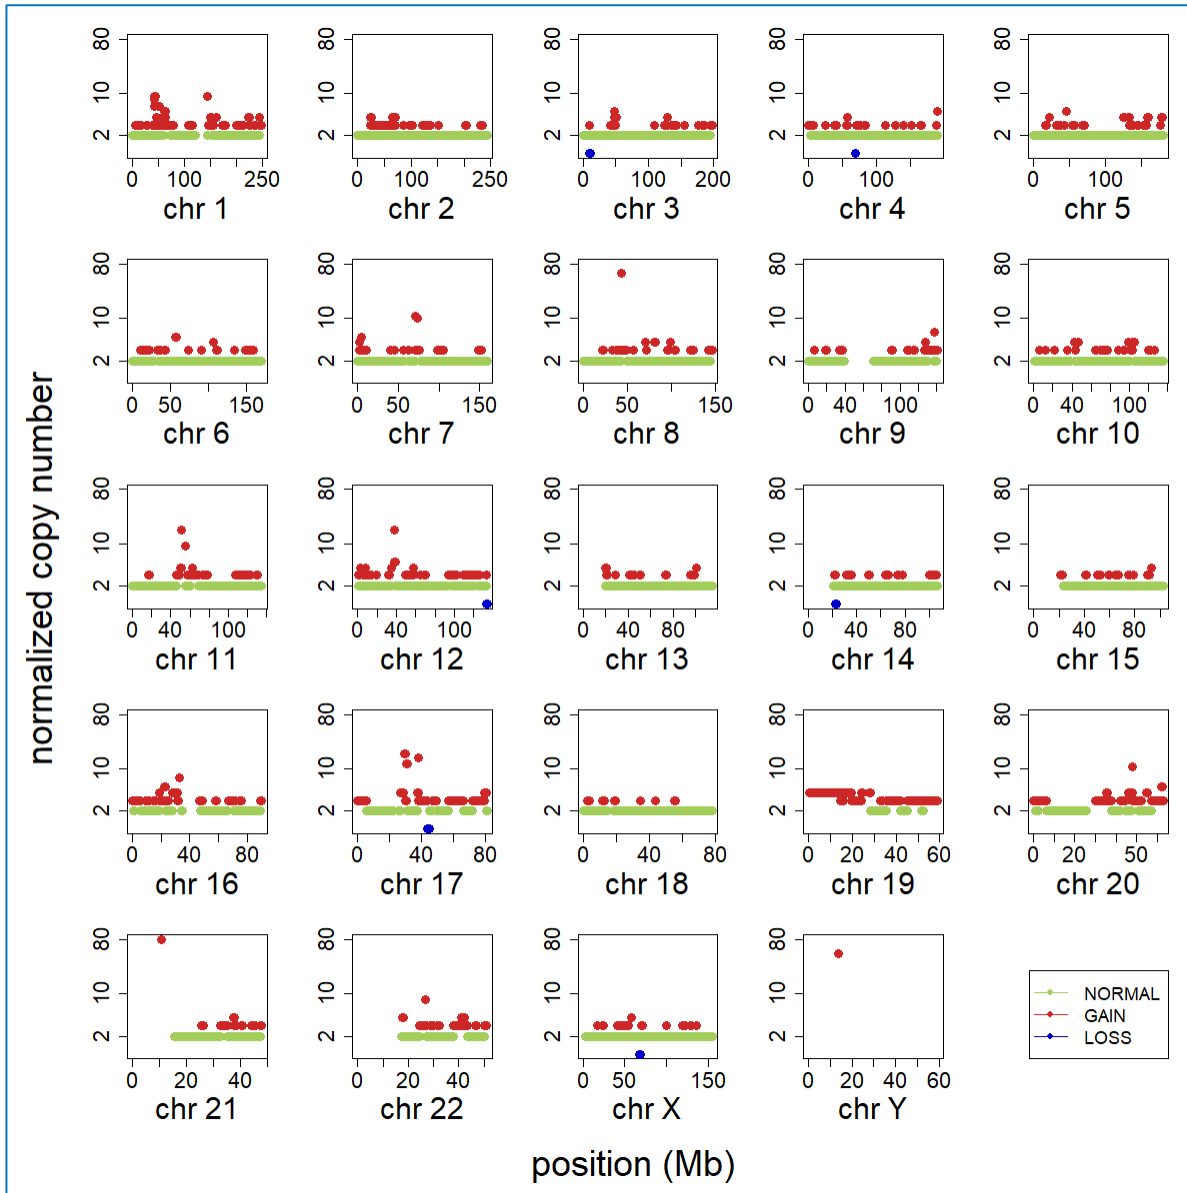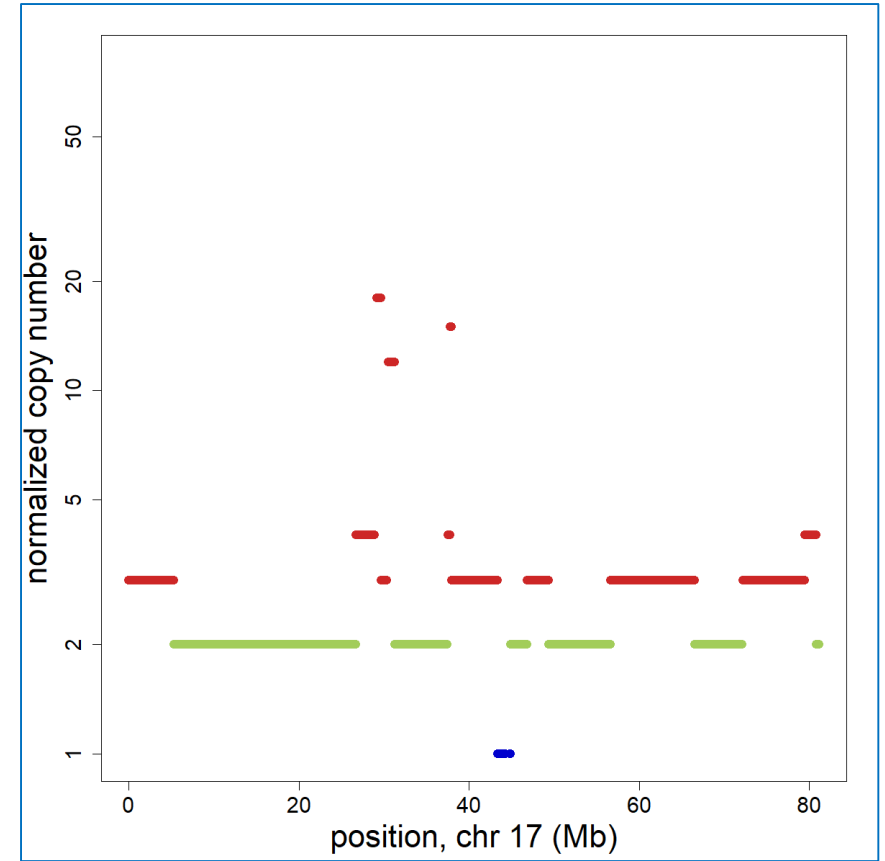

p-25

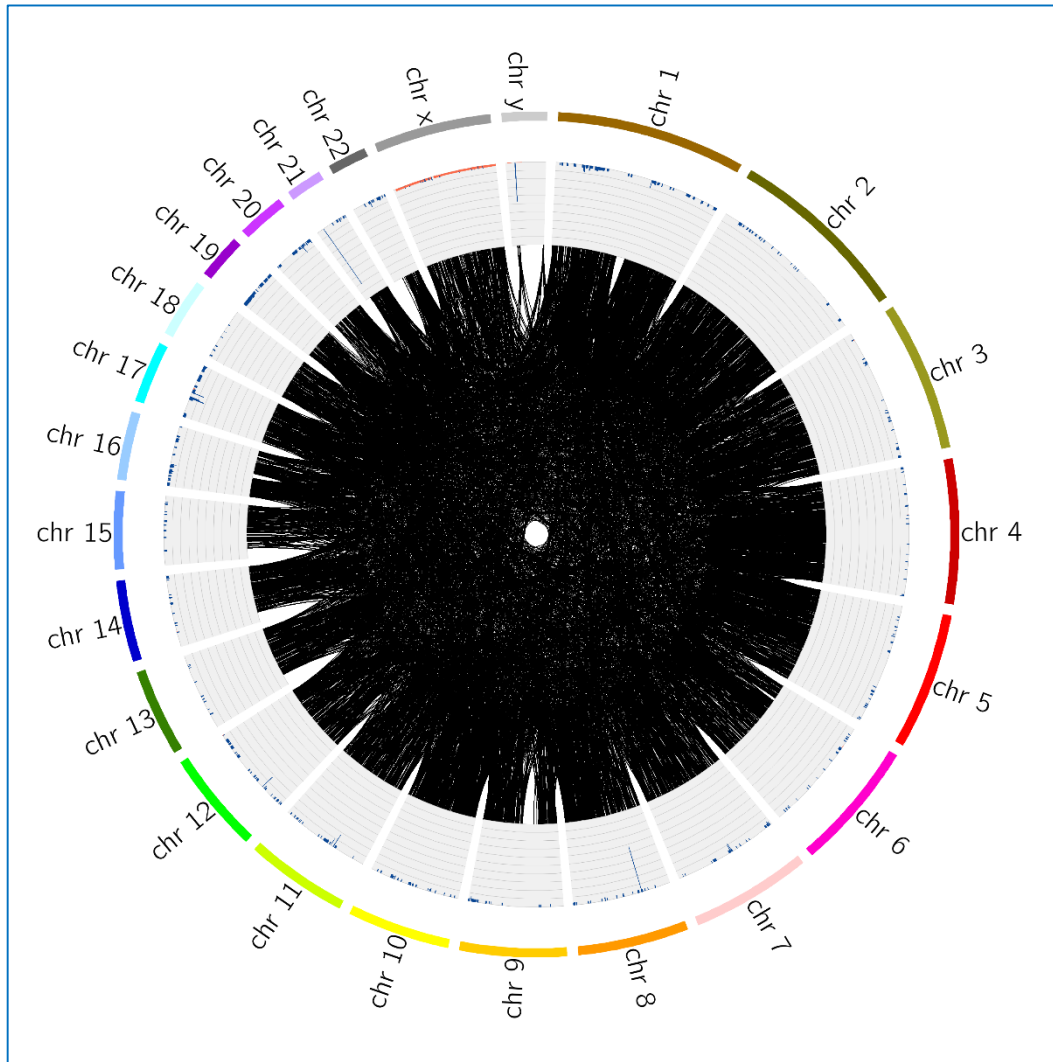

BreakDancer + Control-FREEC

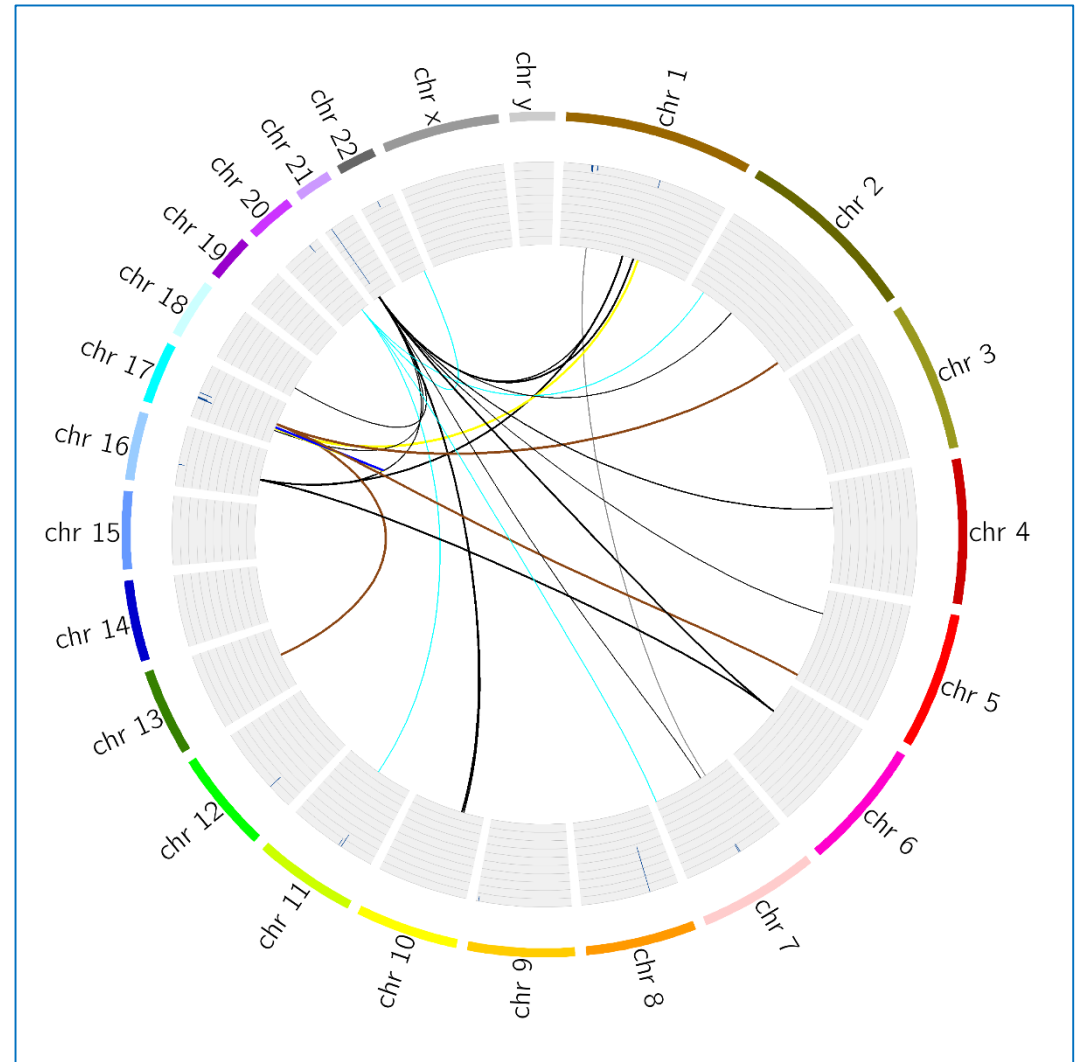

FAST - Whole Genome

p-25

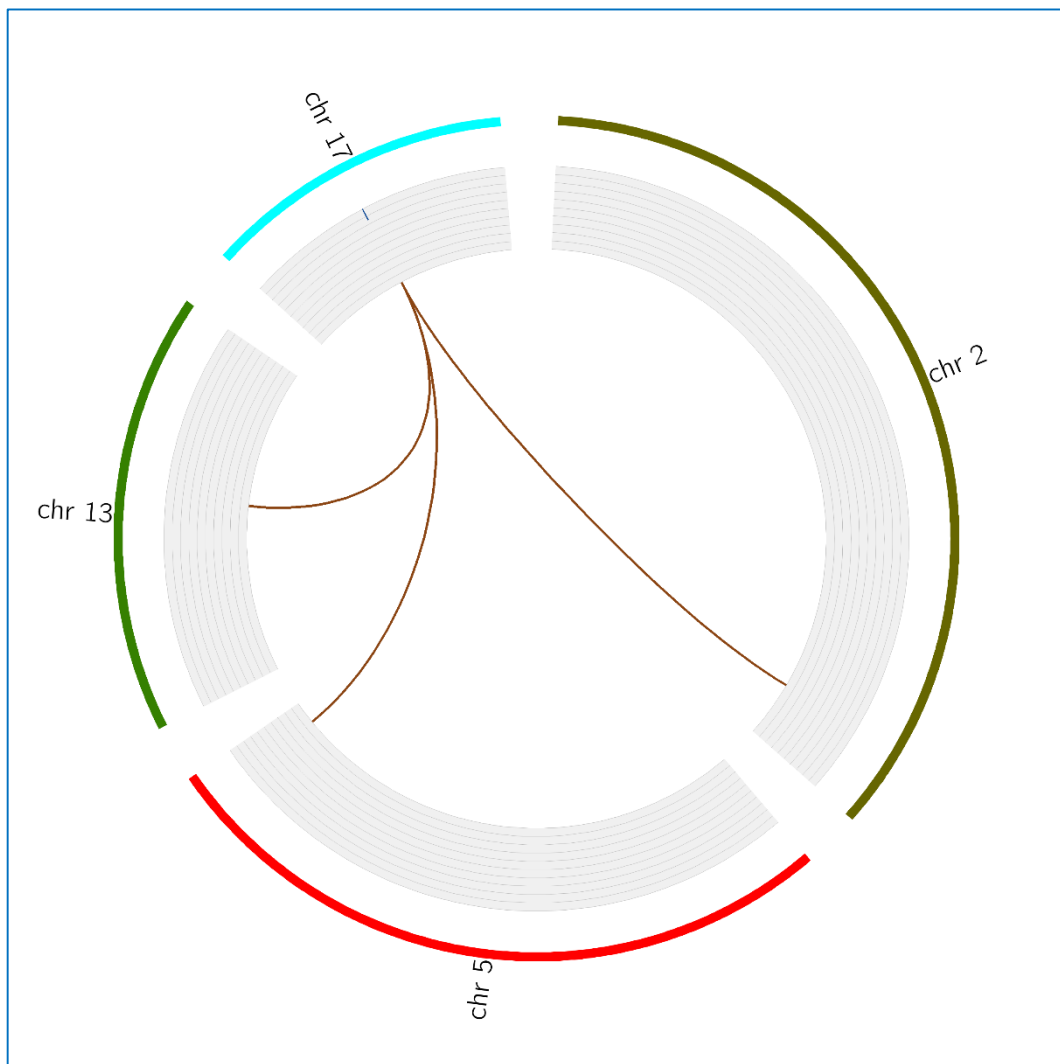

FAST – ERBB2 amplicon

p-27

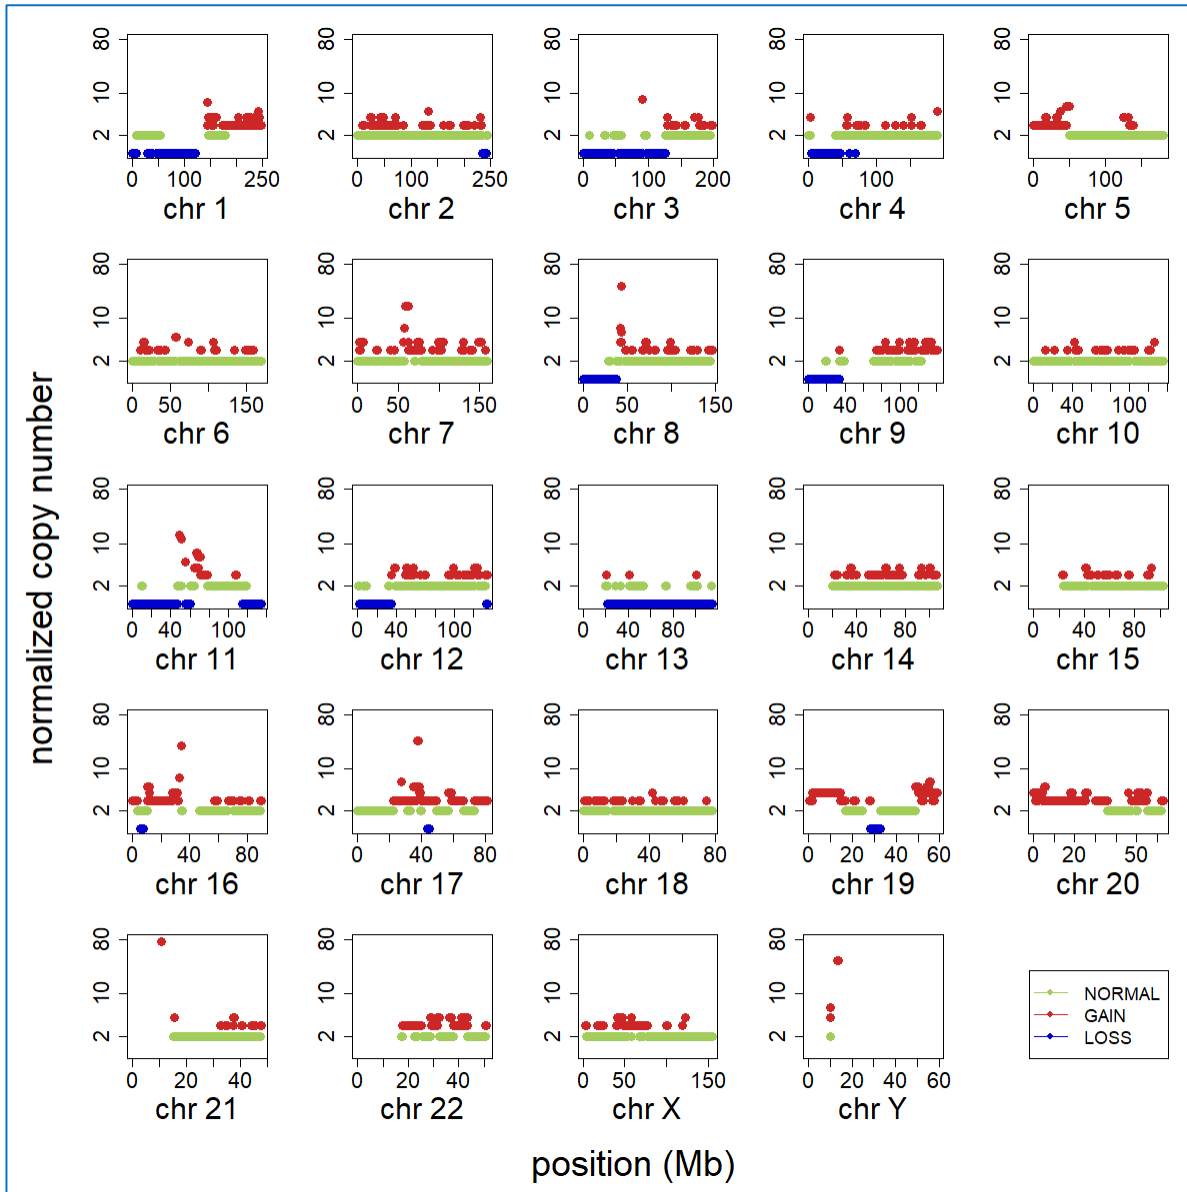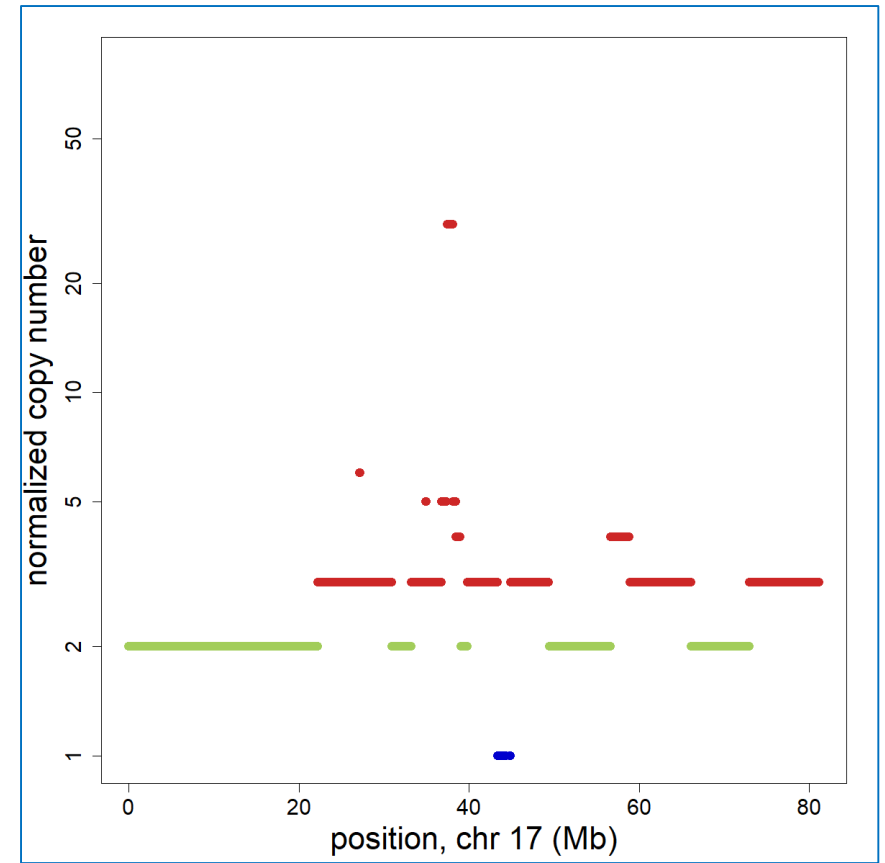

Control-FREEC



p-27

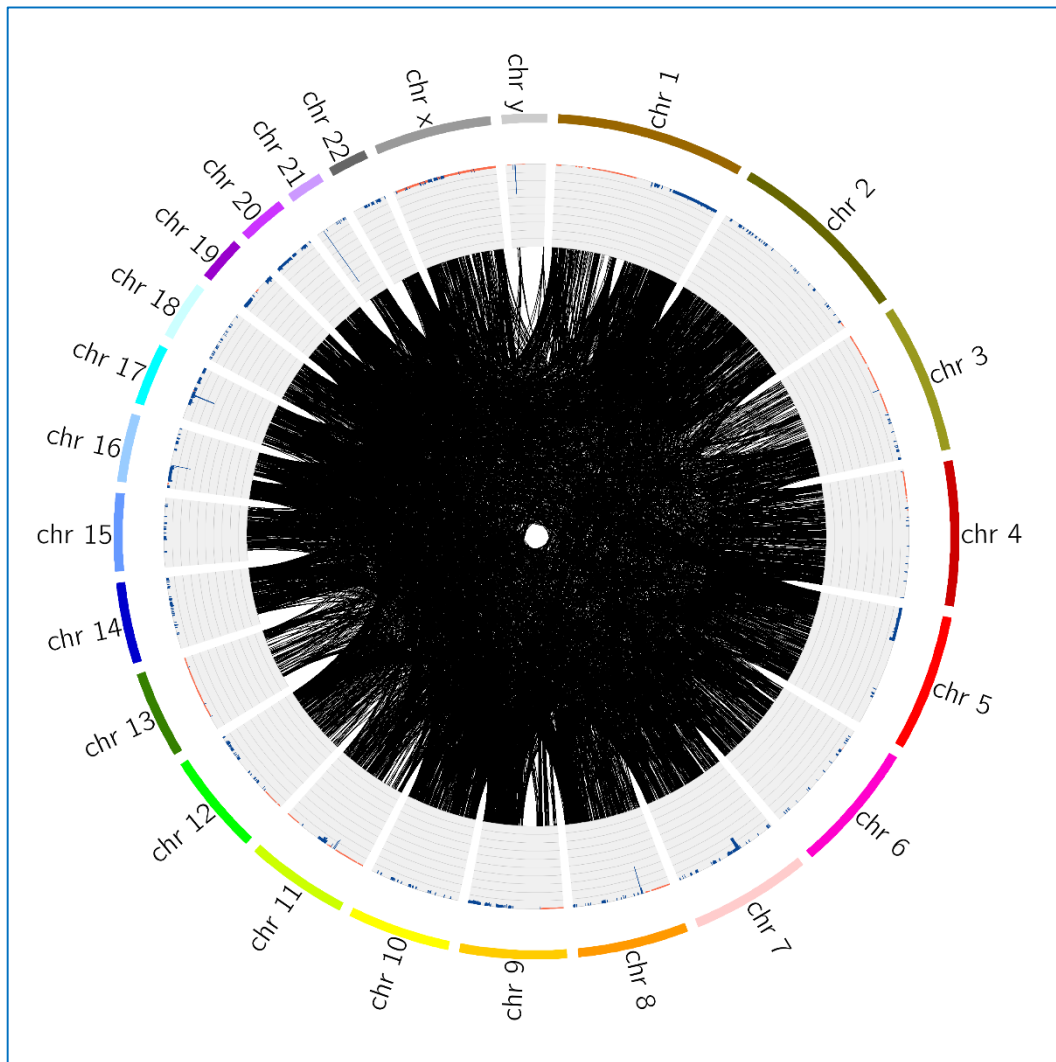

BreakDancer + Control-FREEC

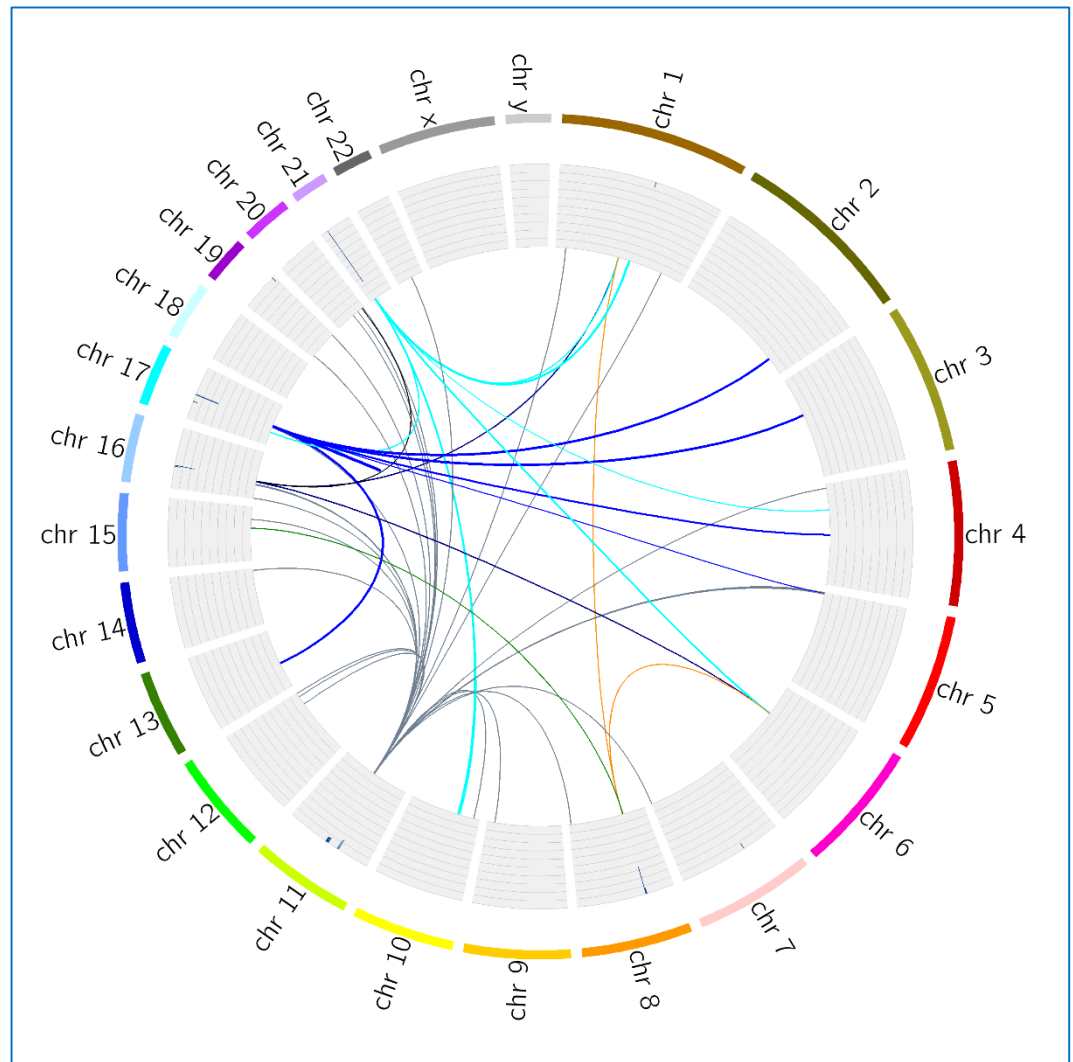

FAST - Whole Genome

p-27

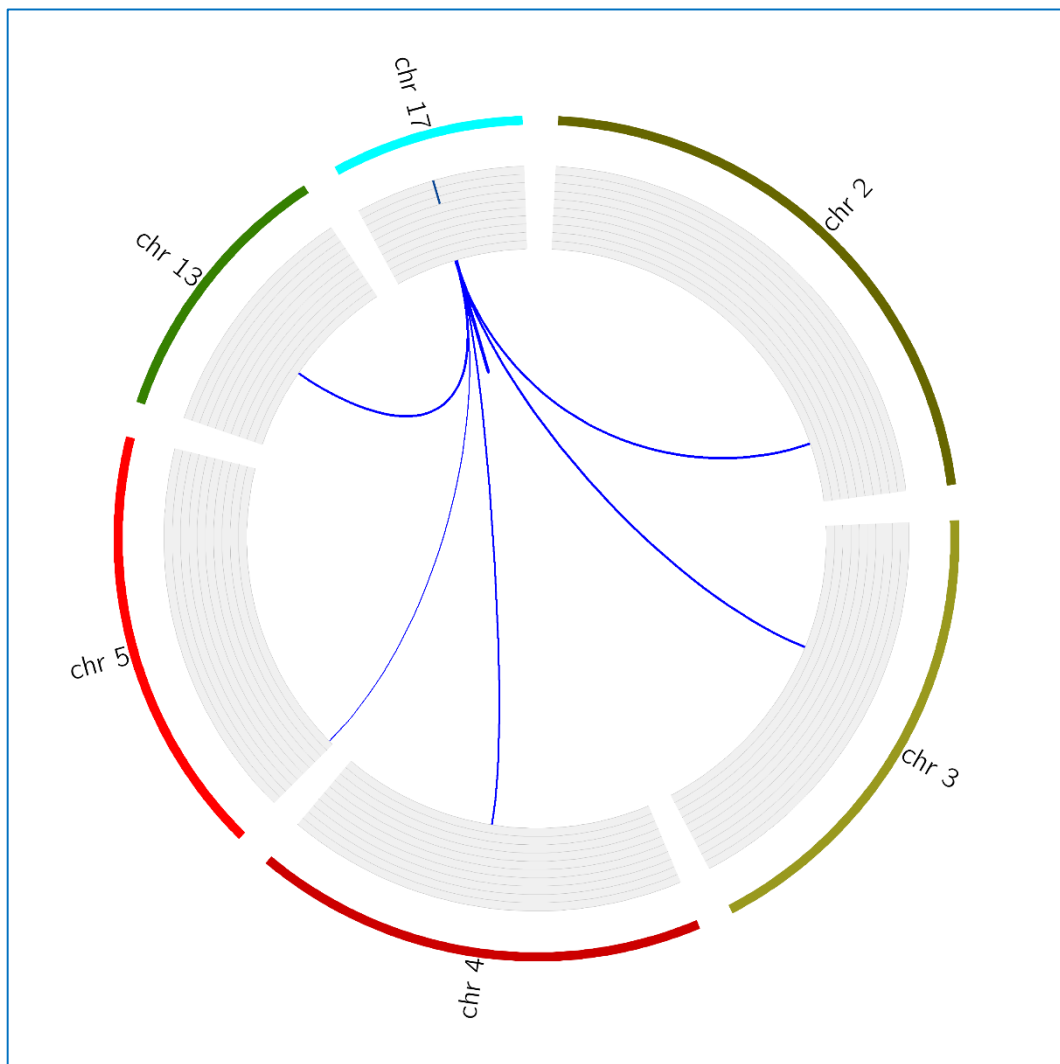

FAST - ERBB2 amplicon

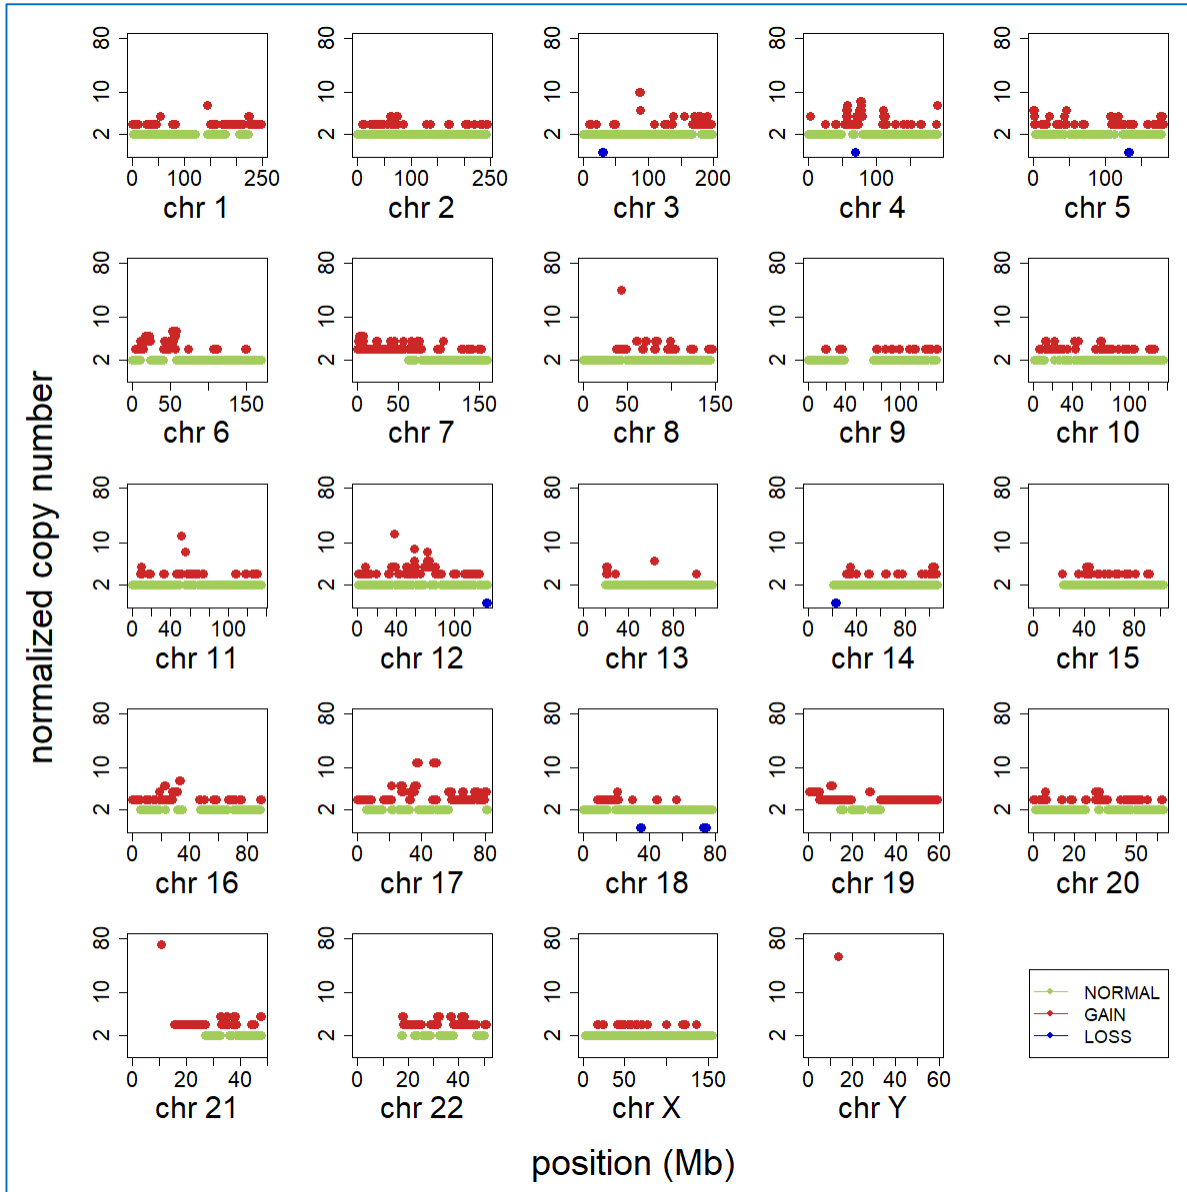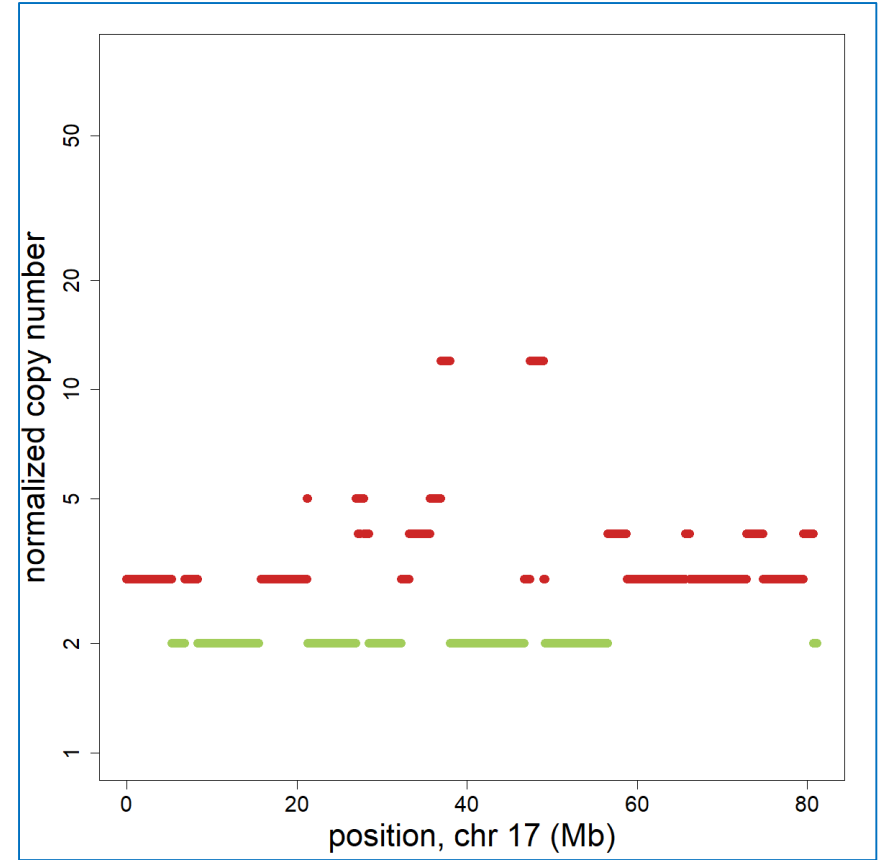

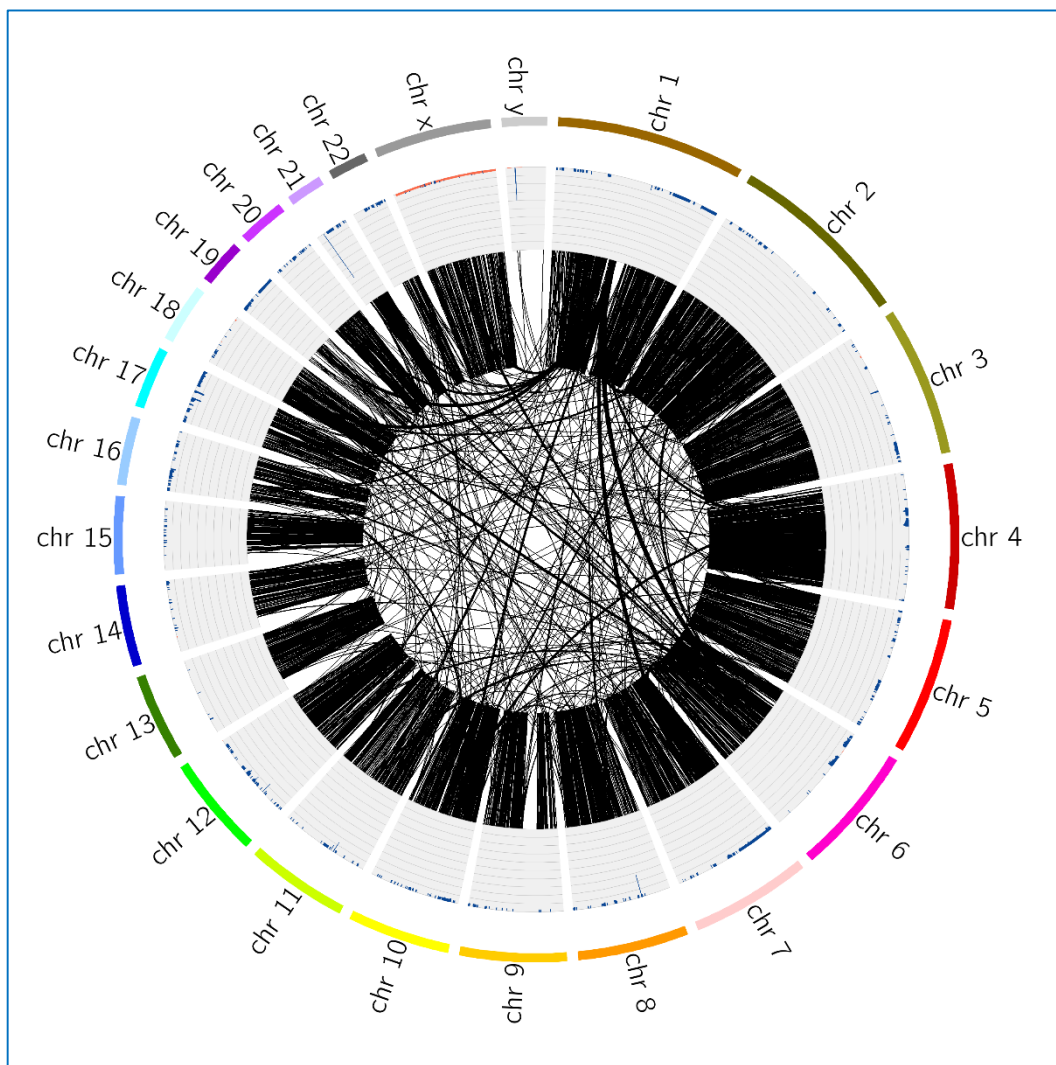

BreakDancer + Control-FREEC

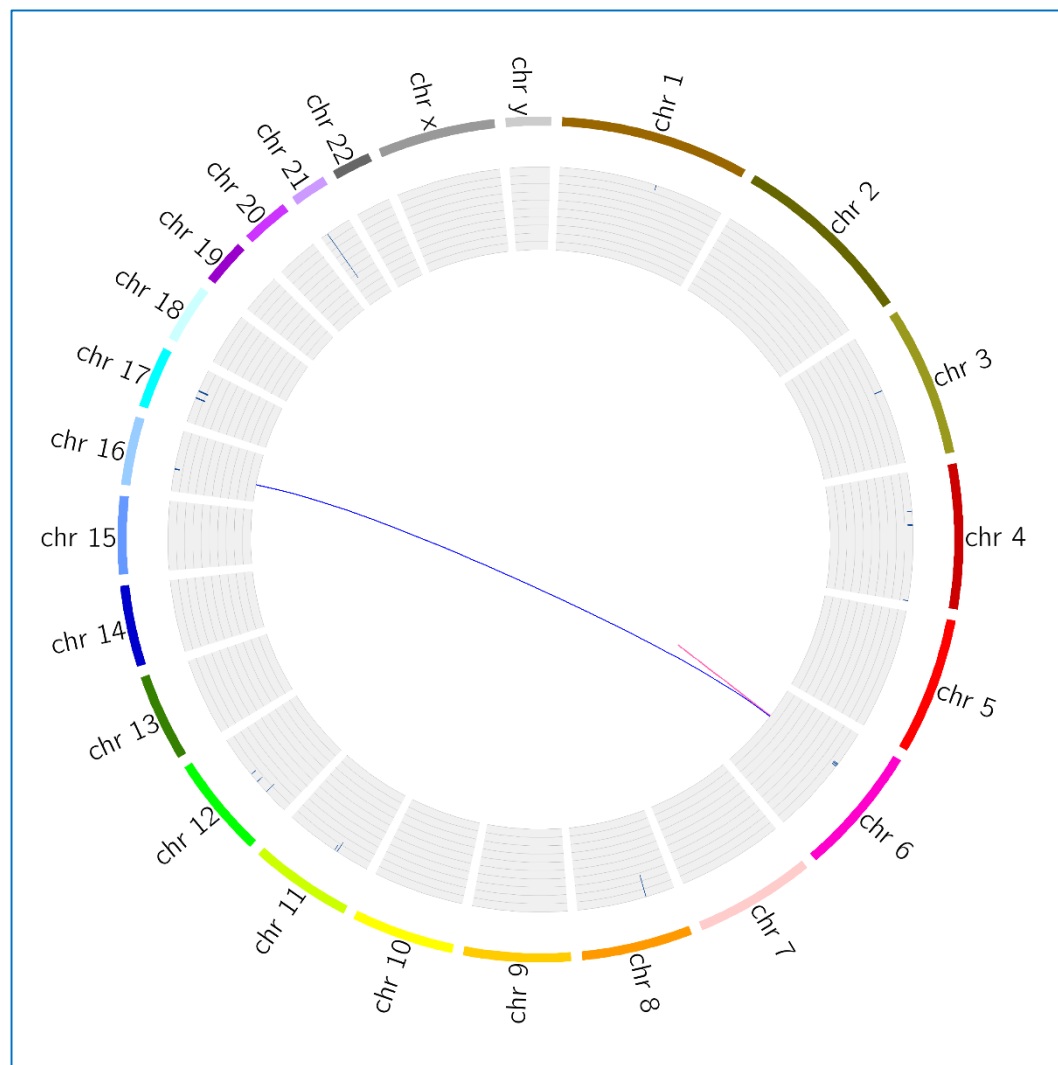

FAST - Whole Genome

p-28

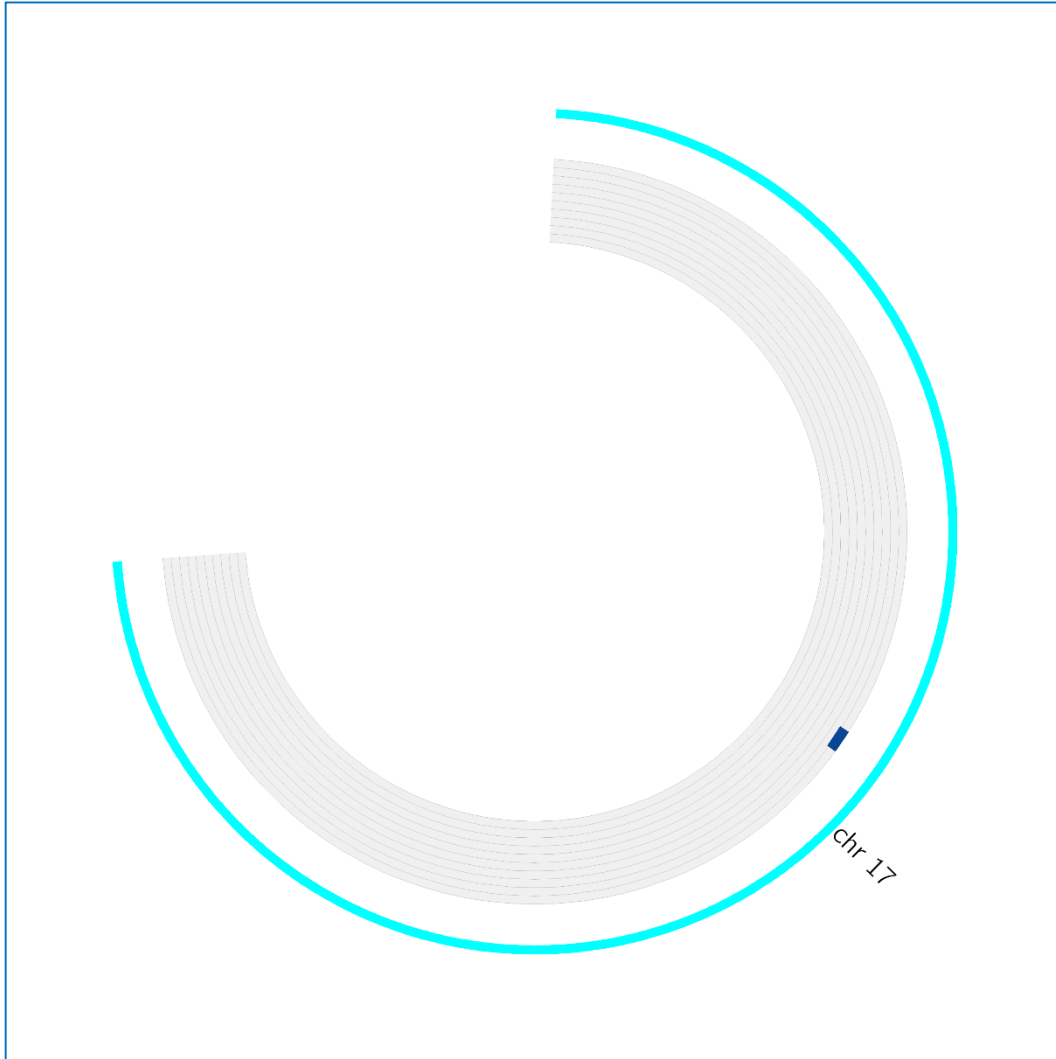

FAST – ERBB2 amplicon

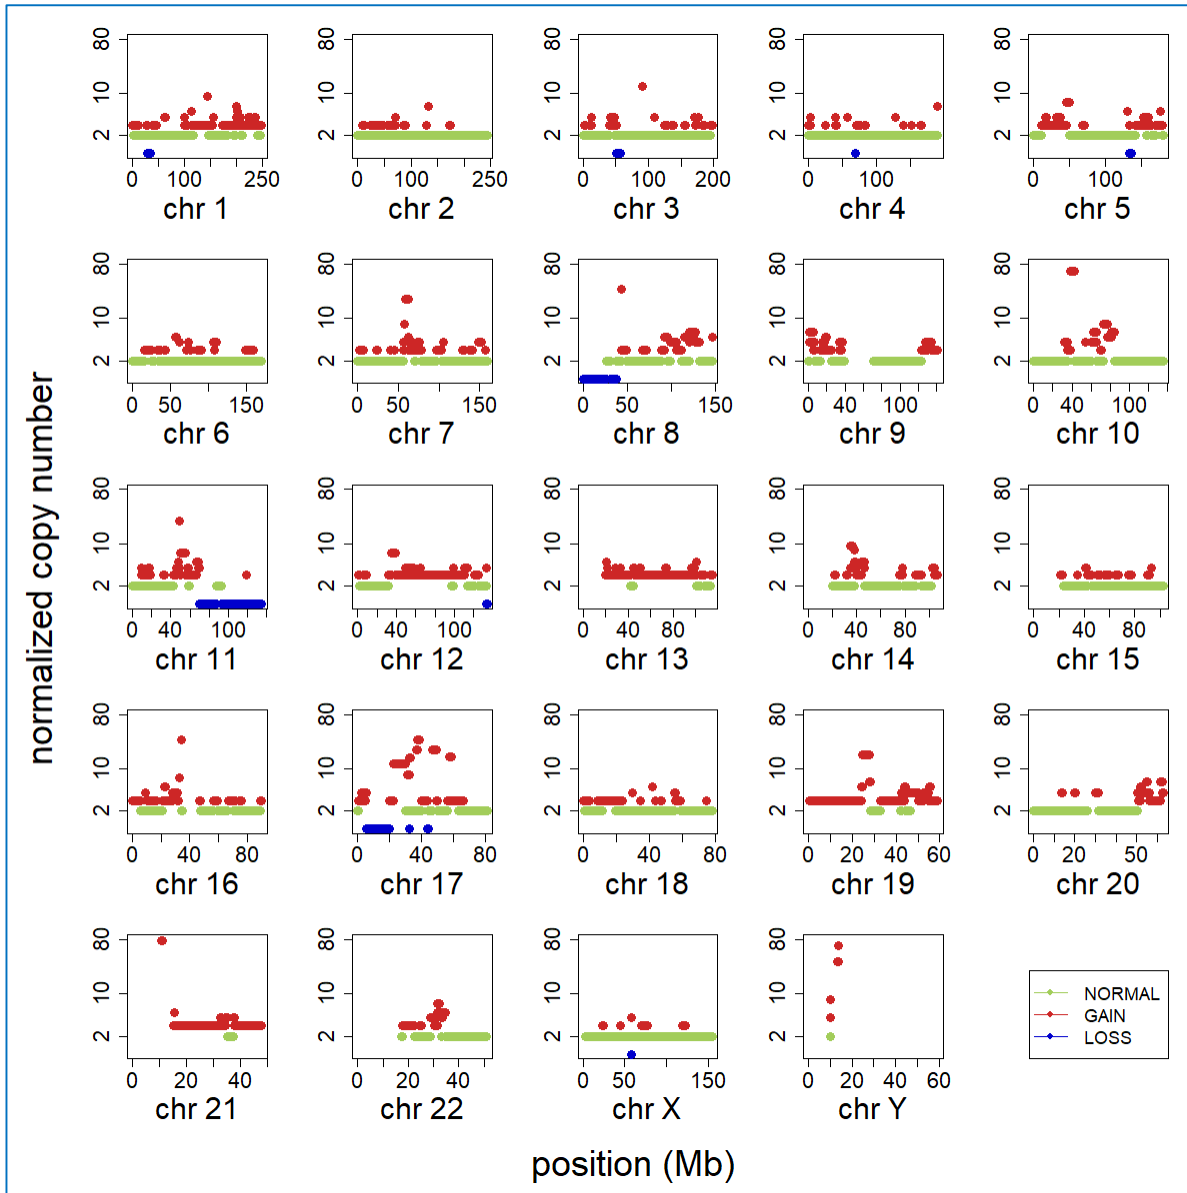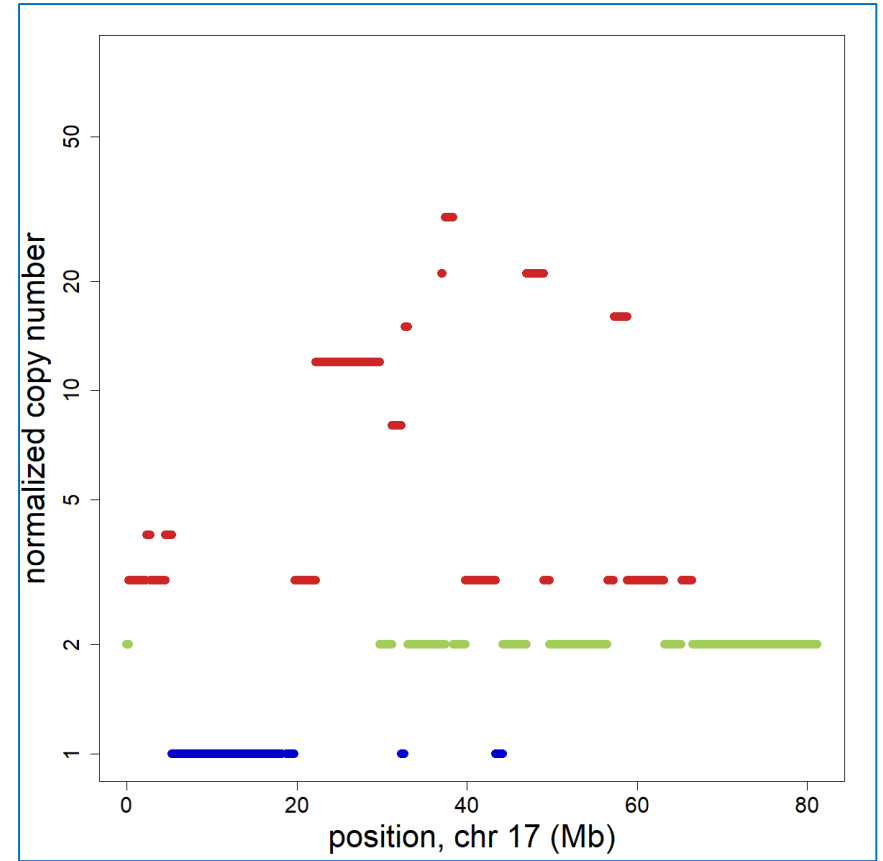

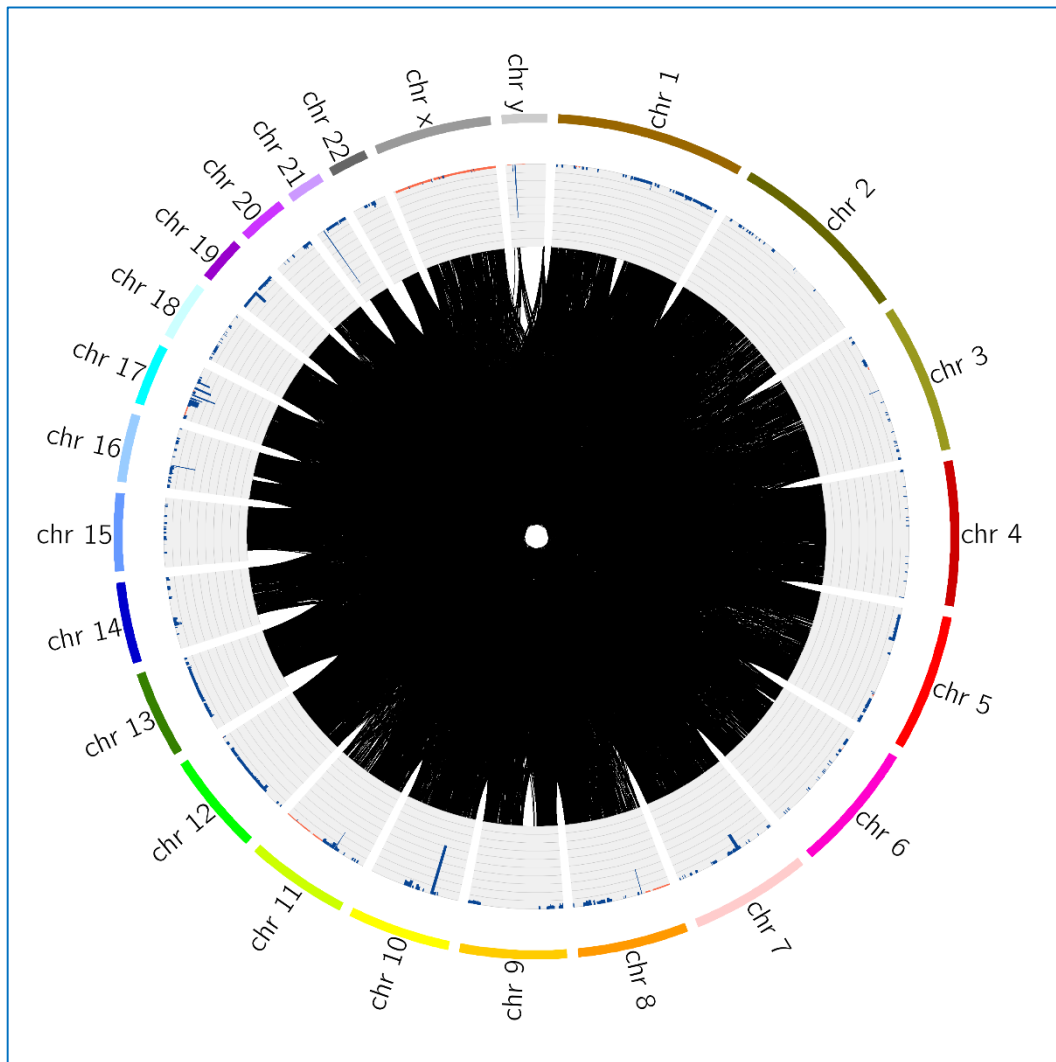

BreakDancer + Control-FREEC

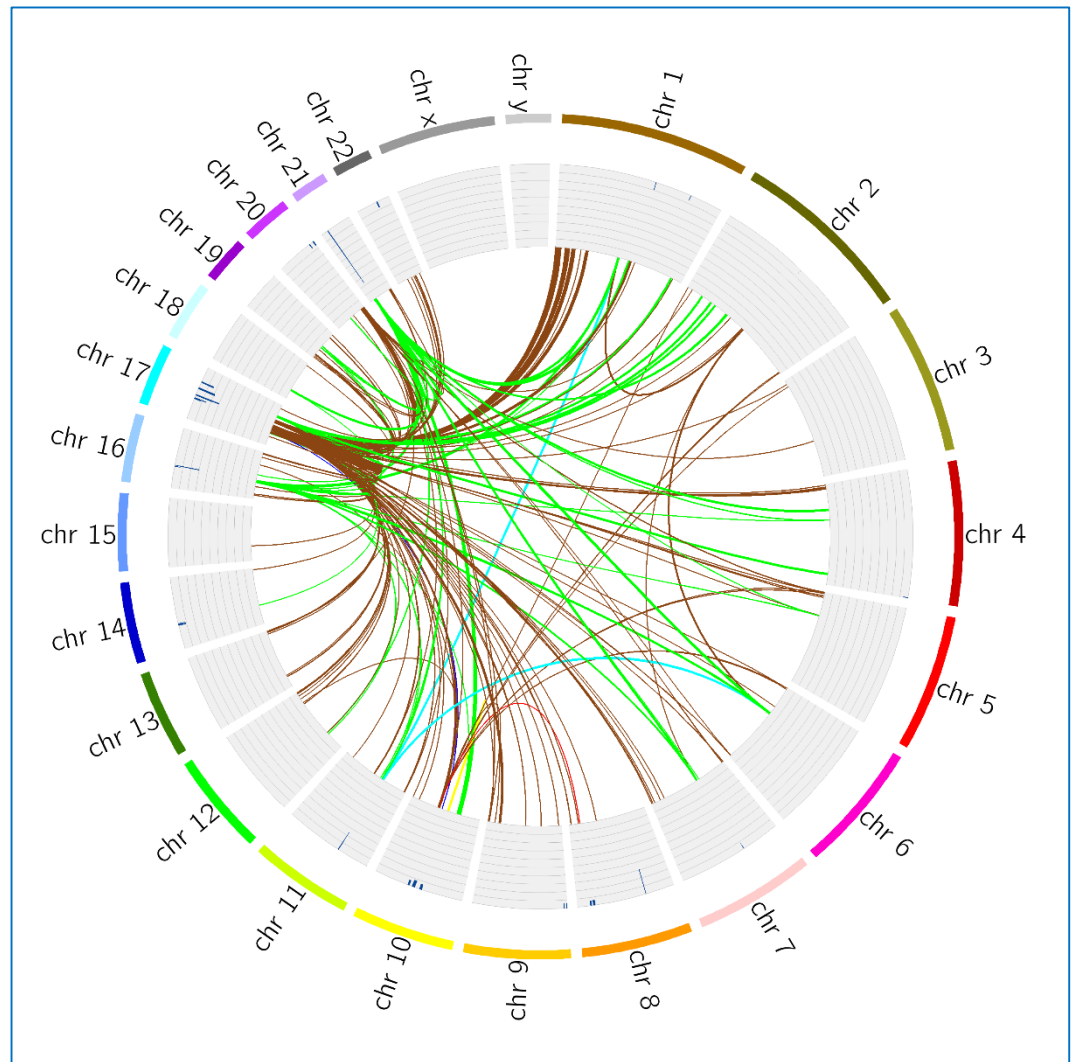

FAST - Whole Genome

p-29

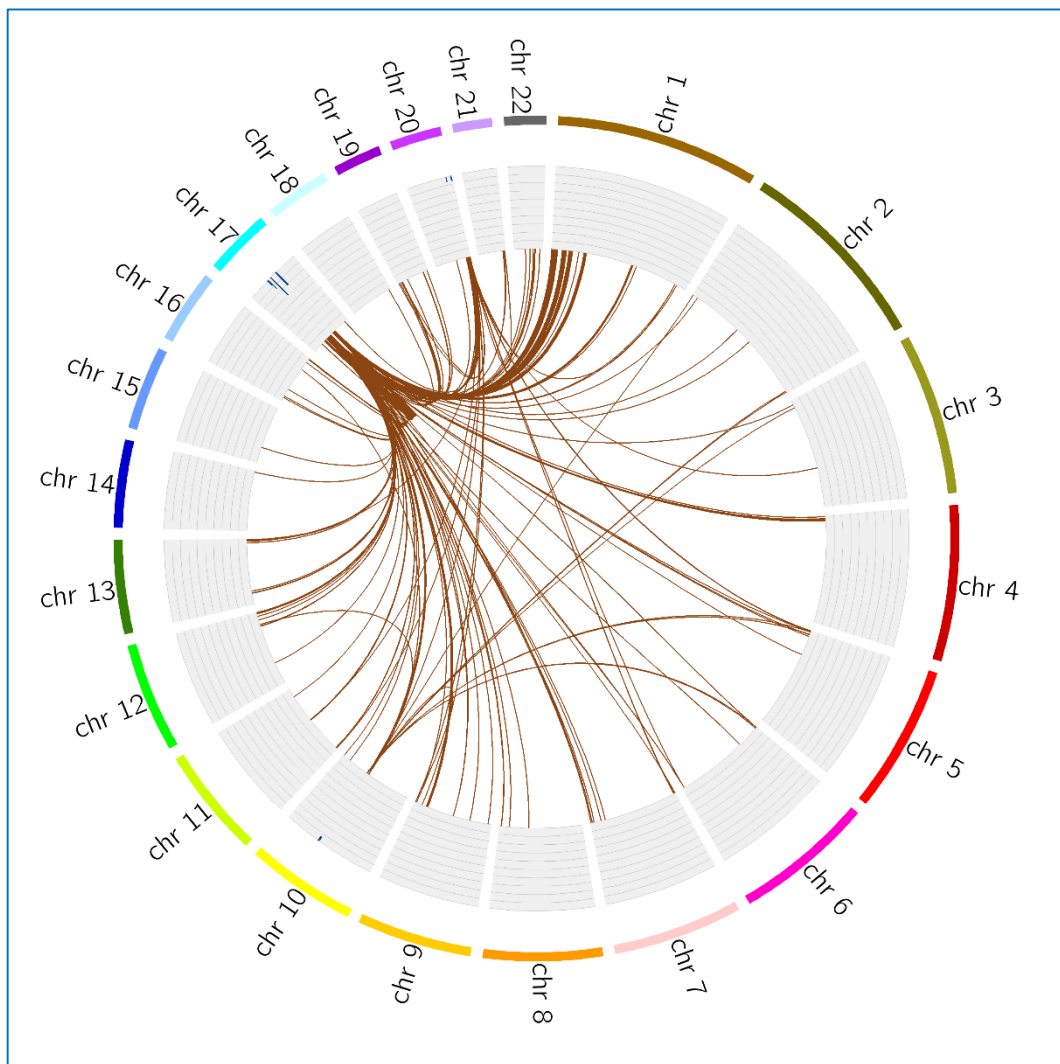

FAST – ERBB2 amplicon



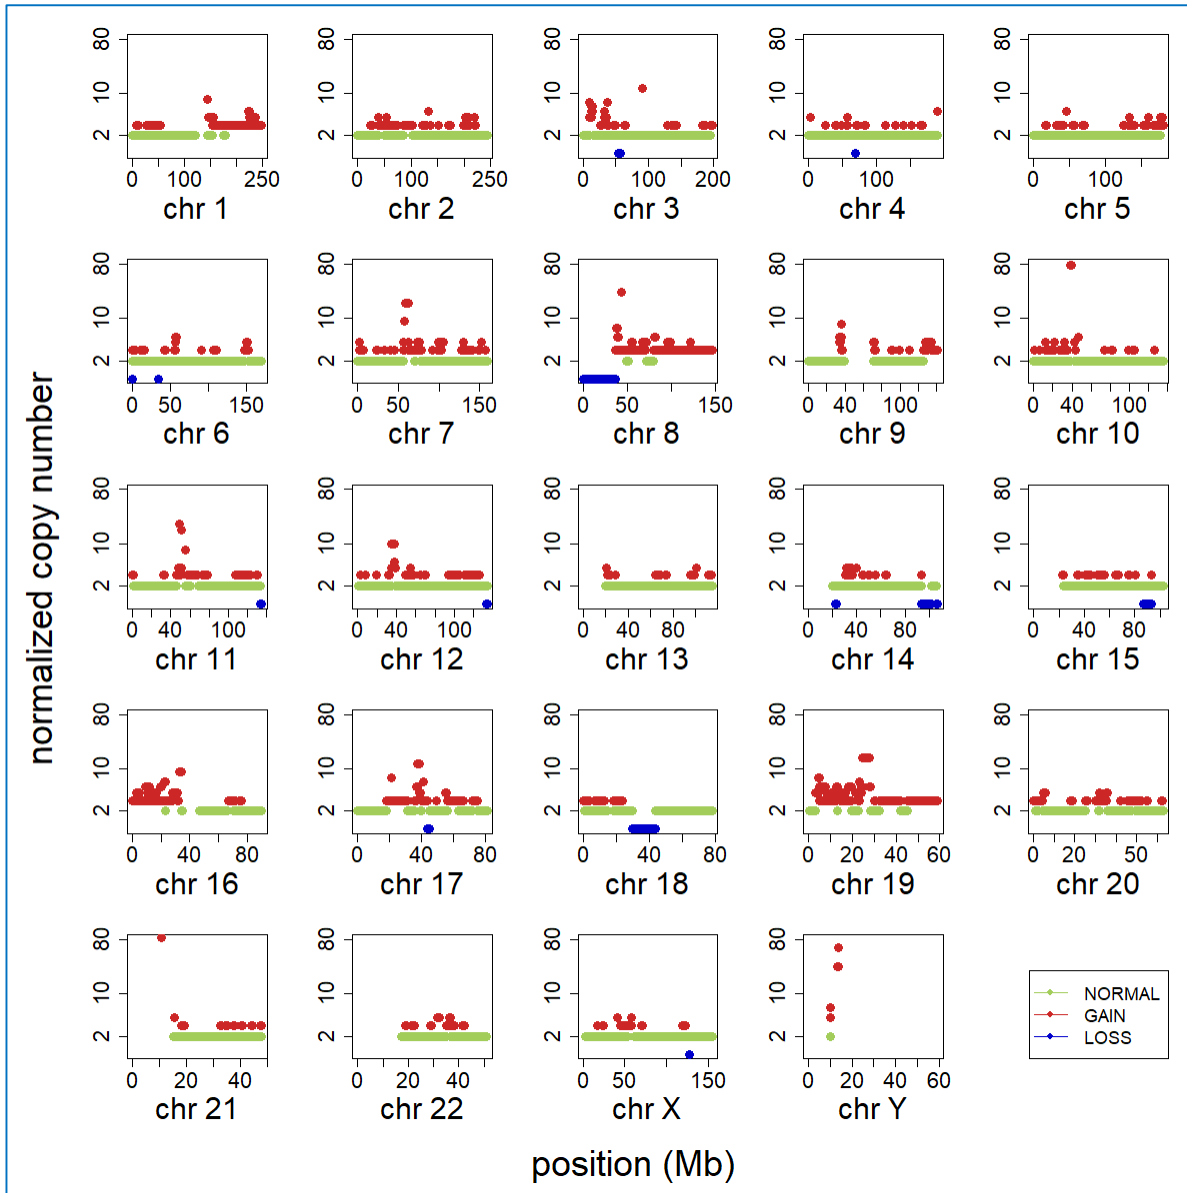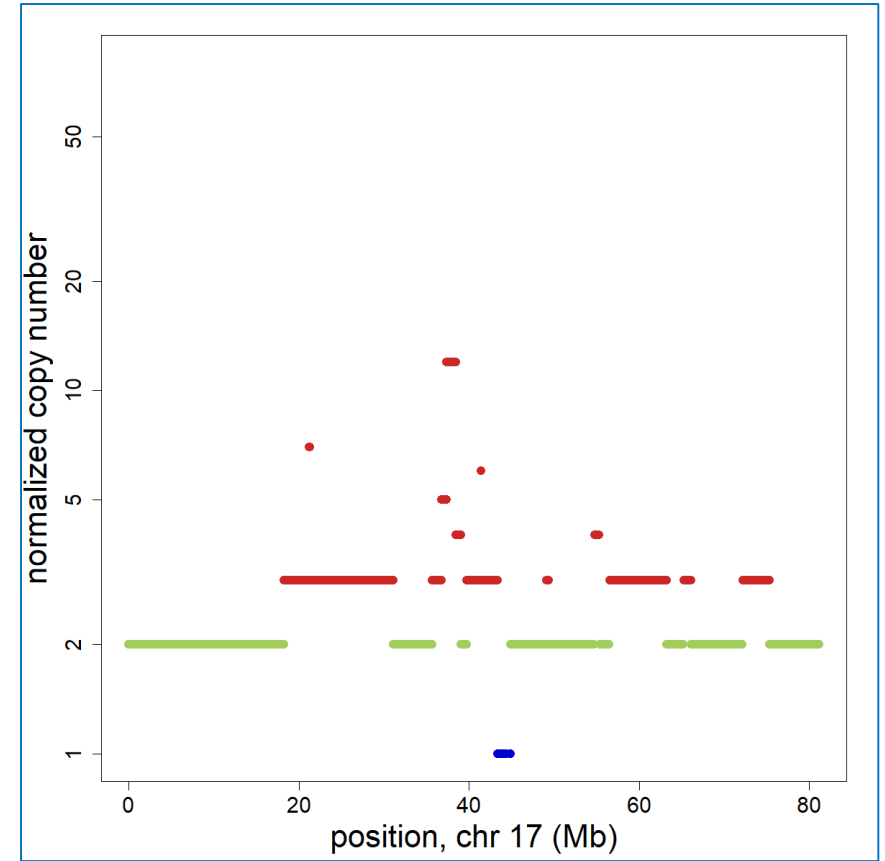

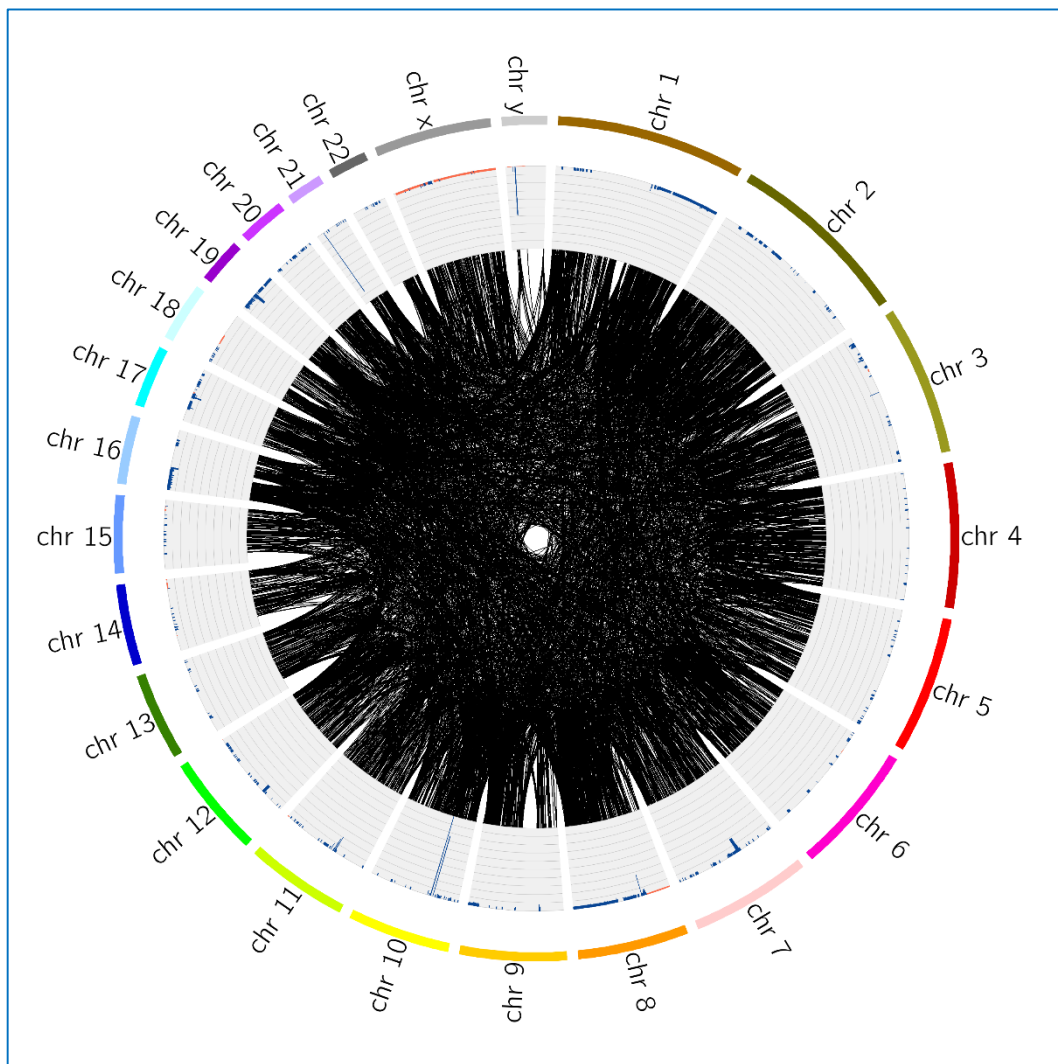

BreakDancer + Control-FREEC

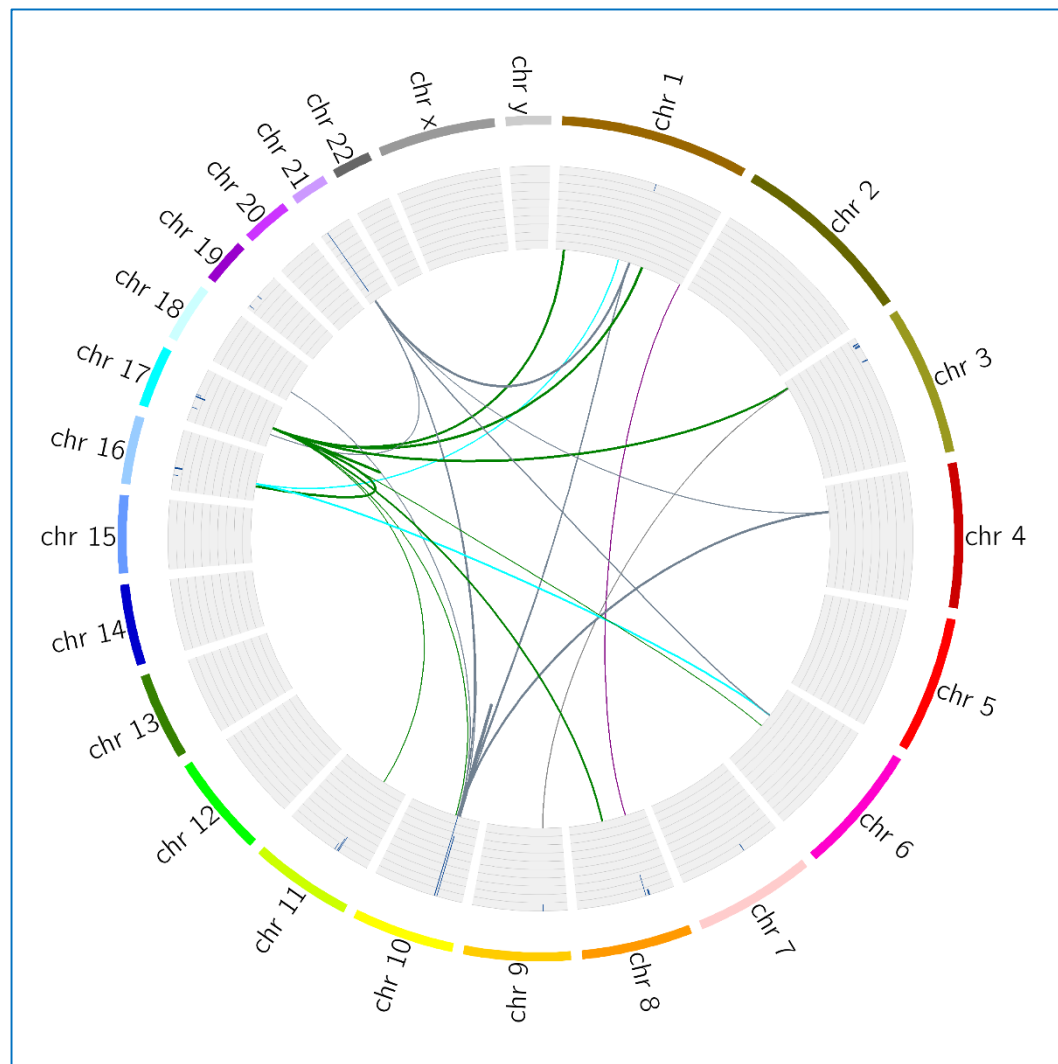

FAST - Whole Genome

p-30

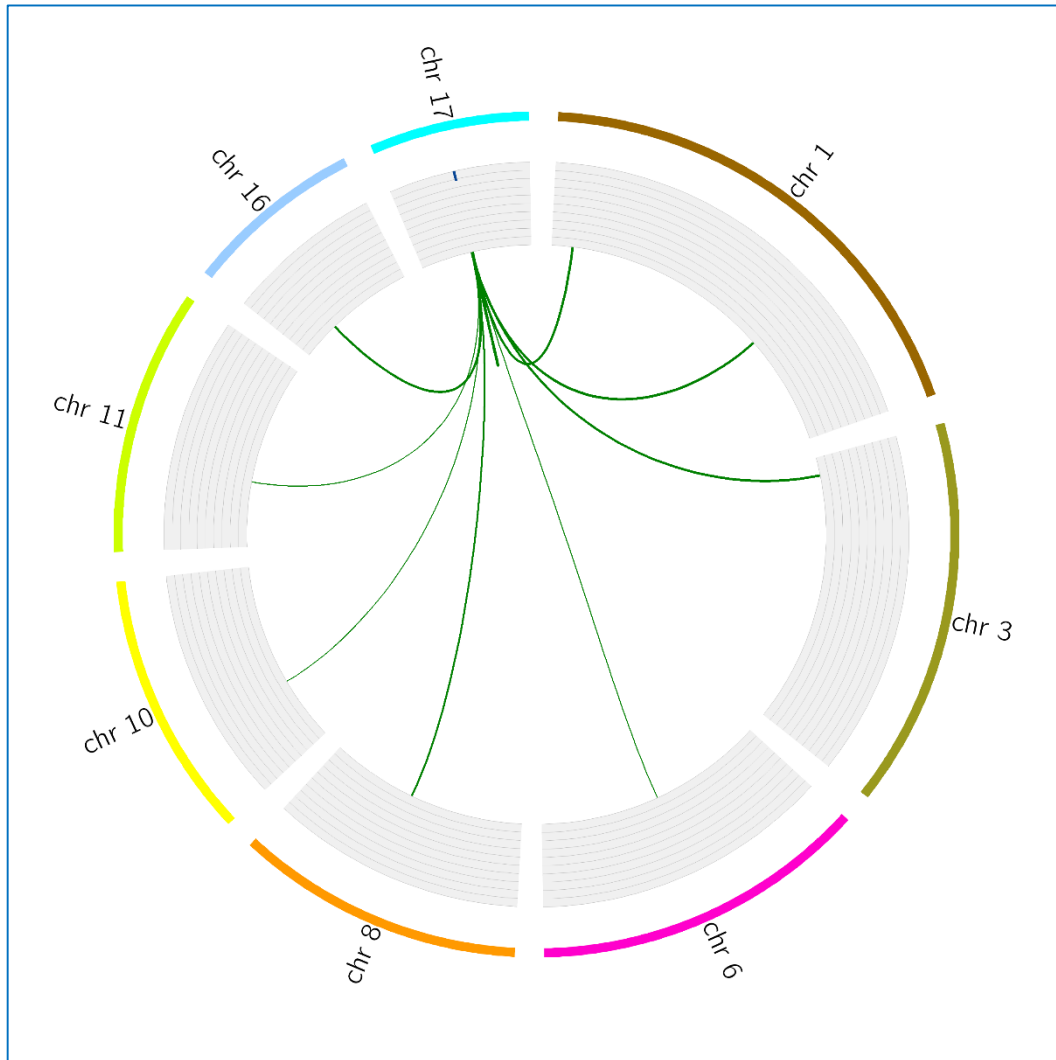

FAST – ERBB2 amplicon

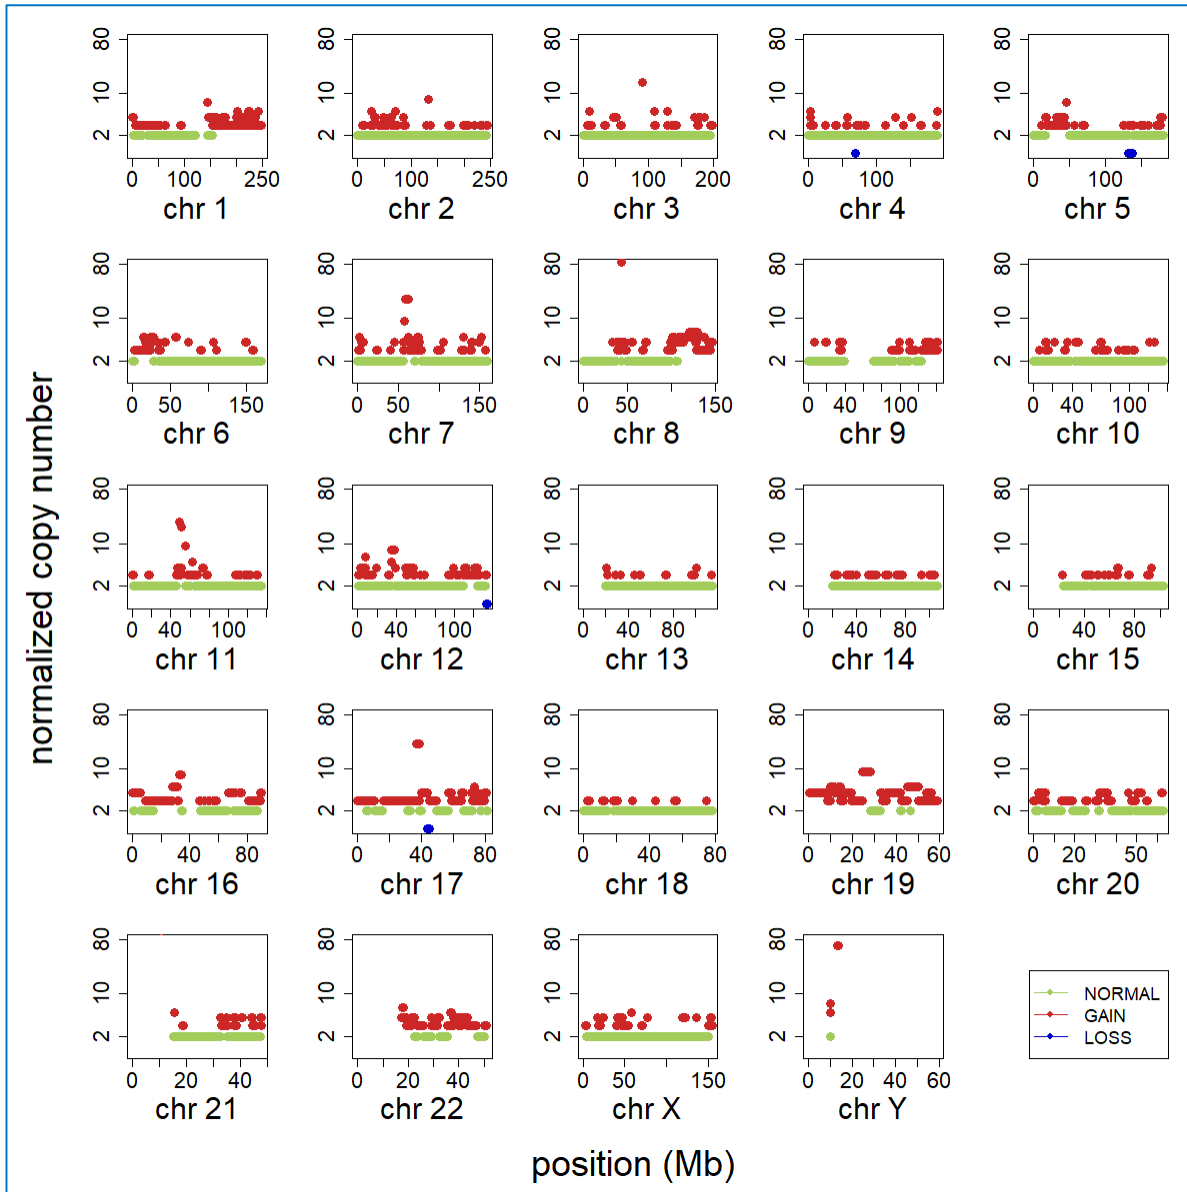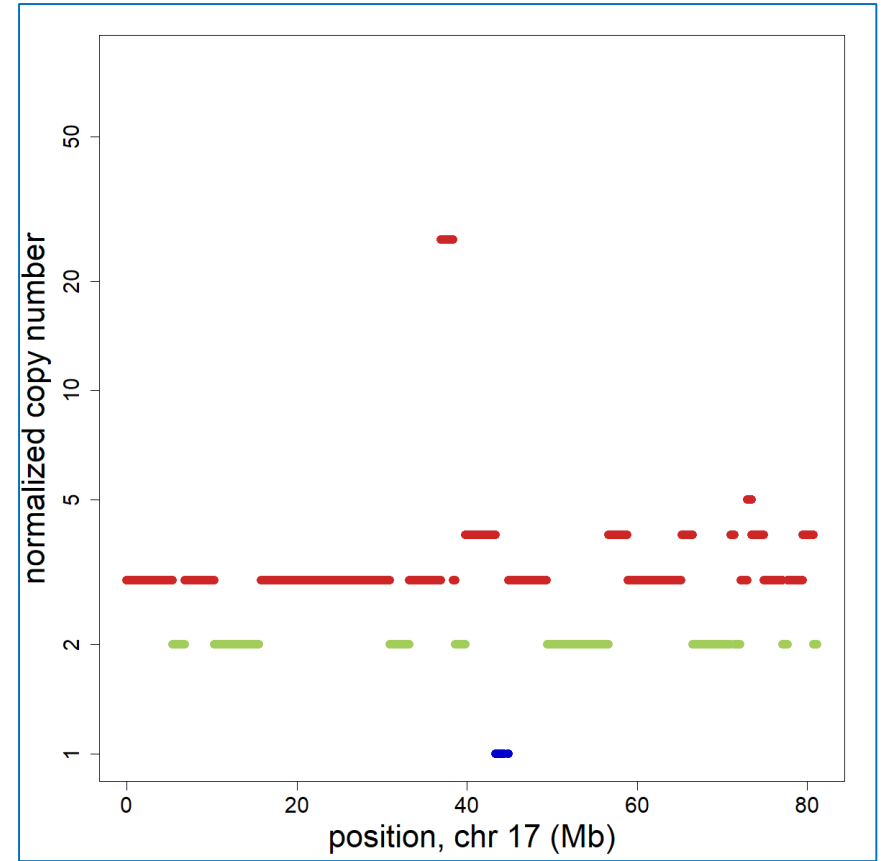

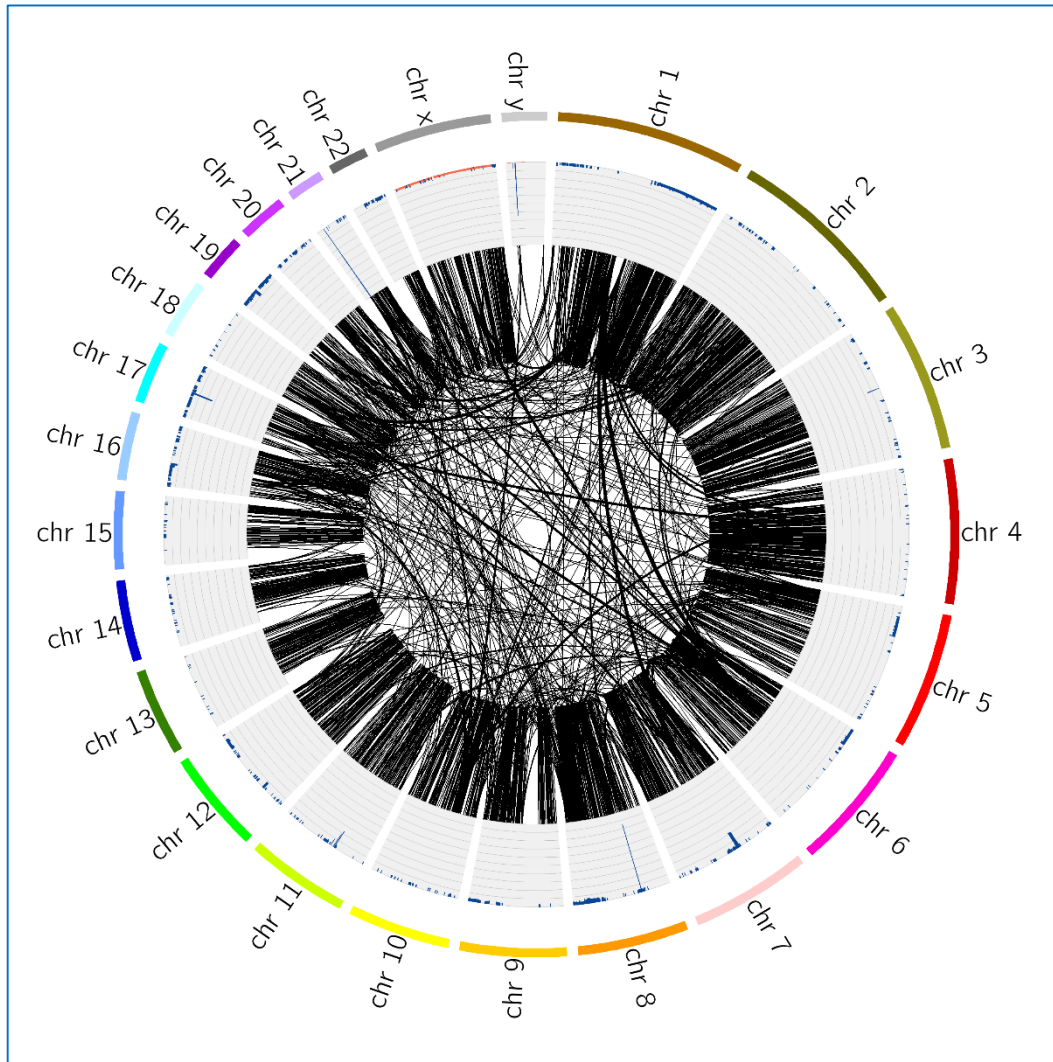

BreakDancer + Control-FREEC

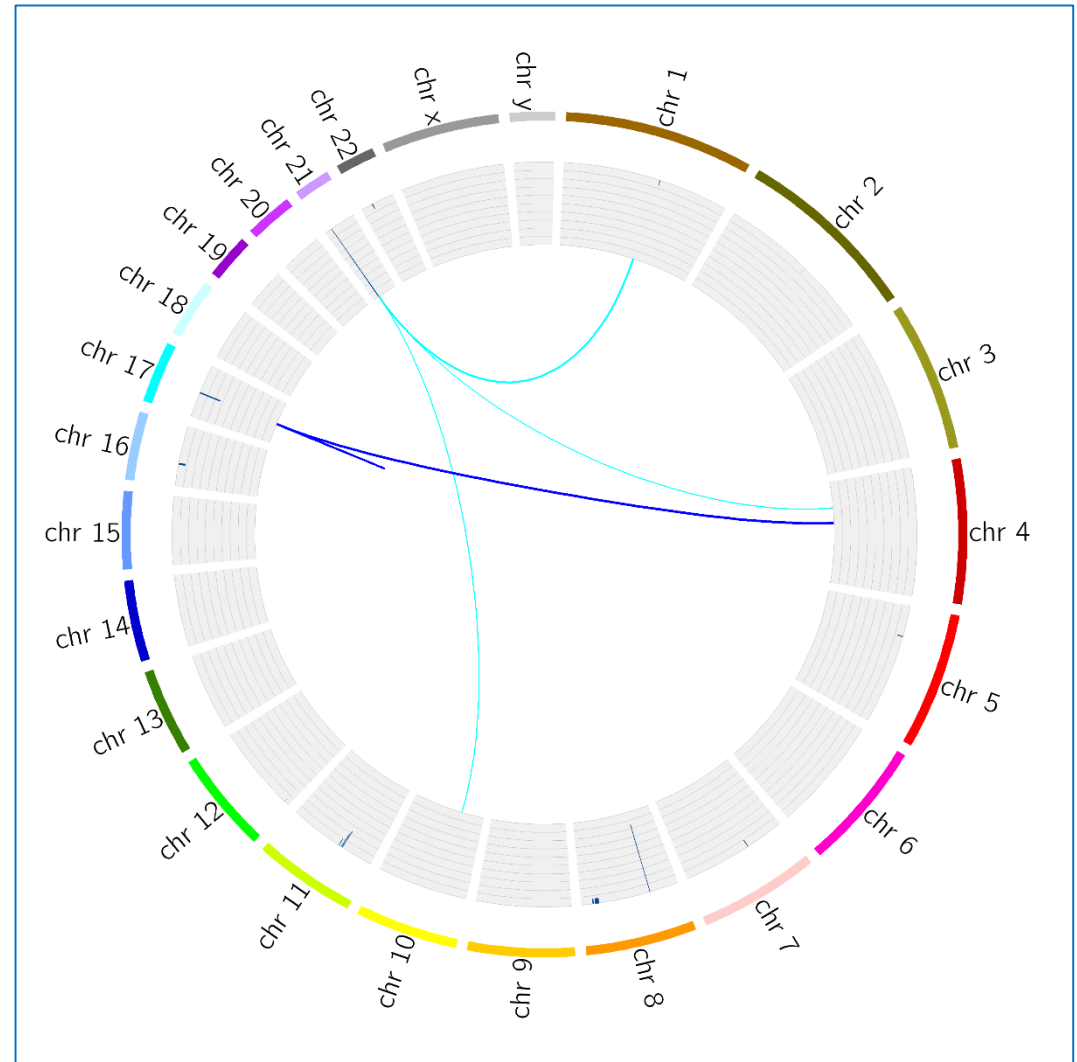

FAST - Whole Genome

p-33

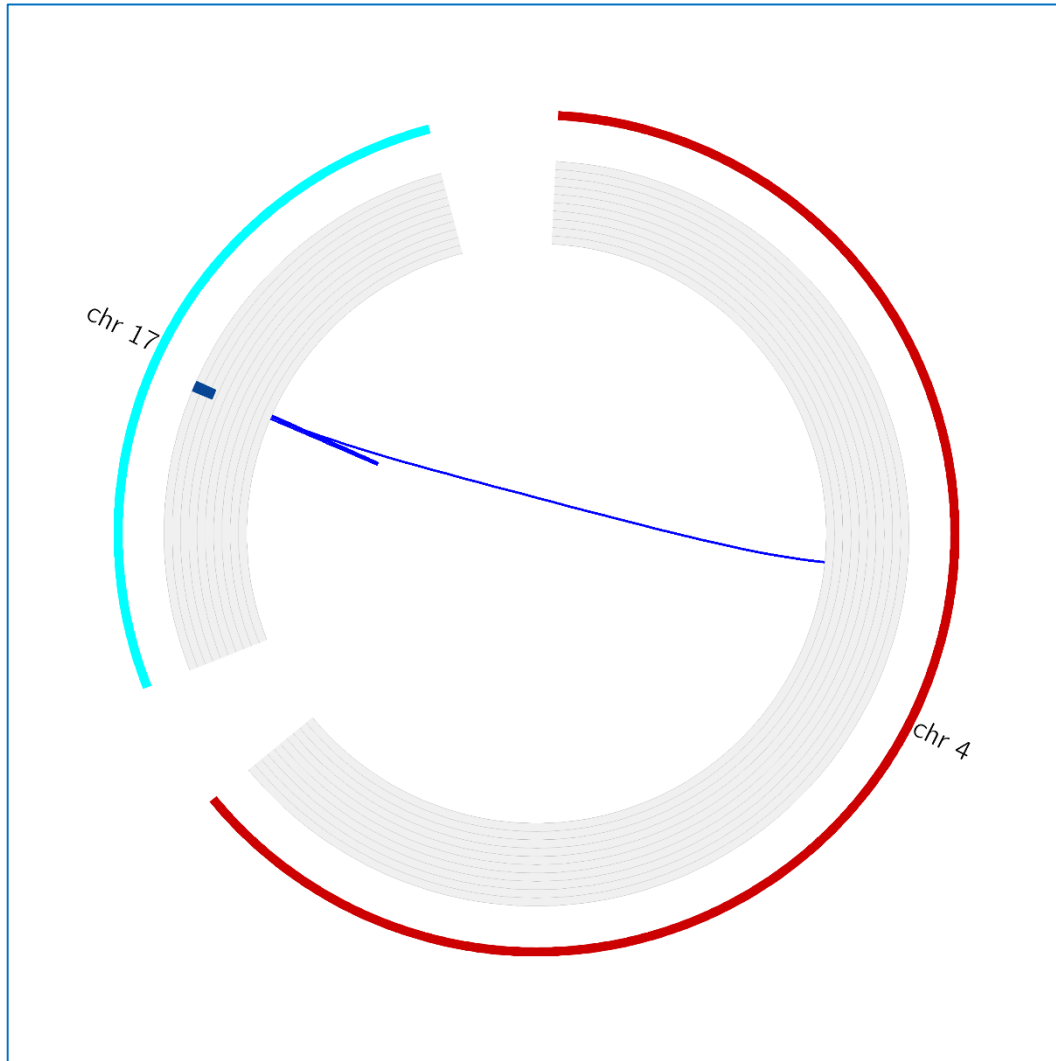

FAST – ERBB2 amplicon

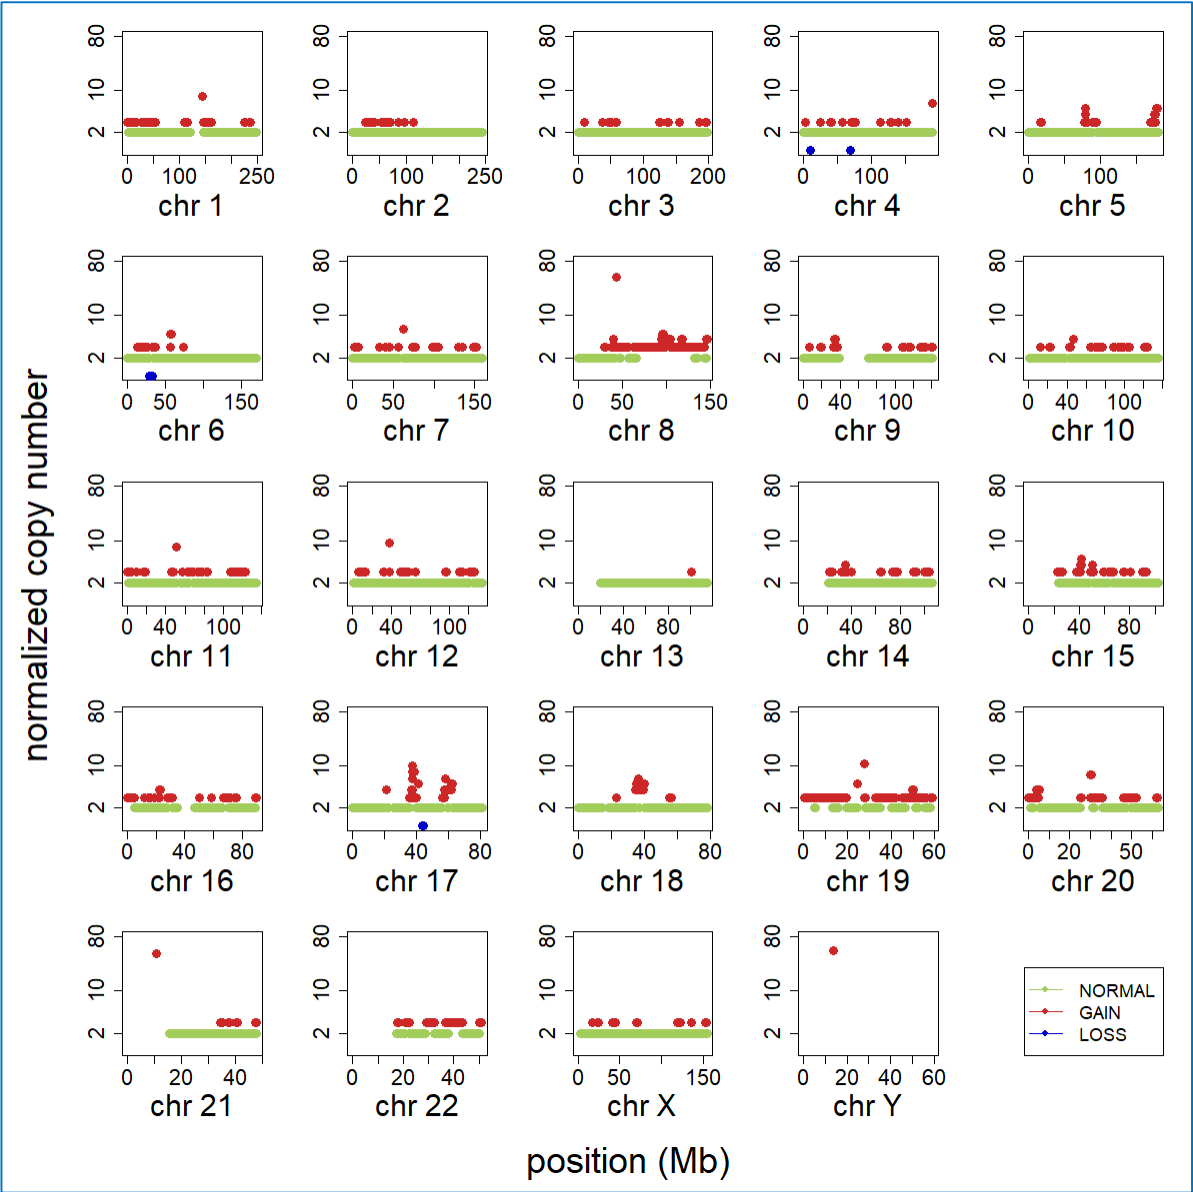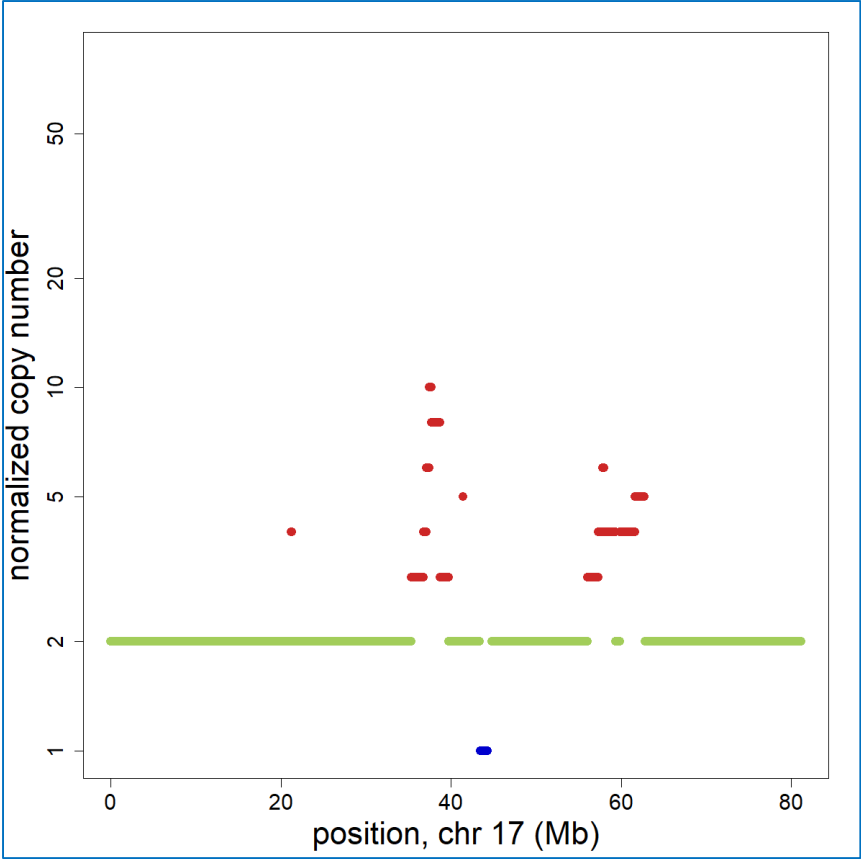

Control-FREEC

p-102

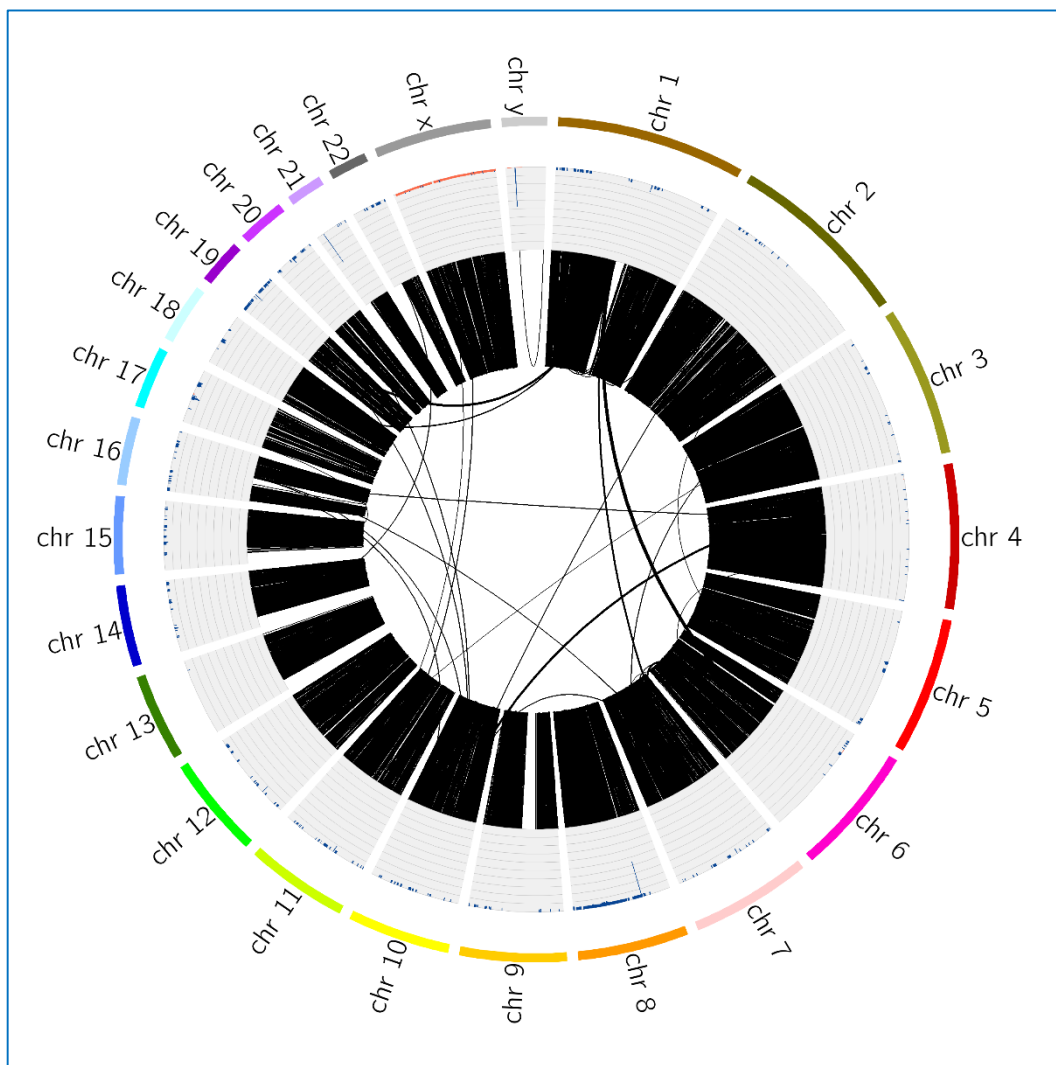

BreakDancer + Control-FREEC

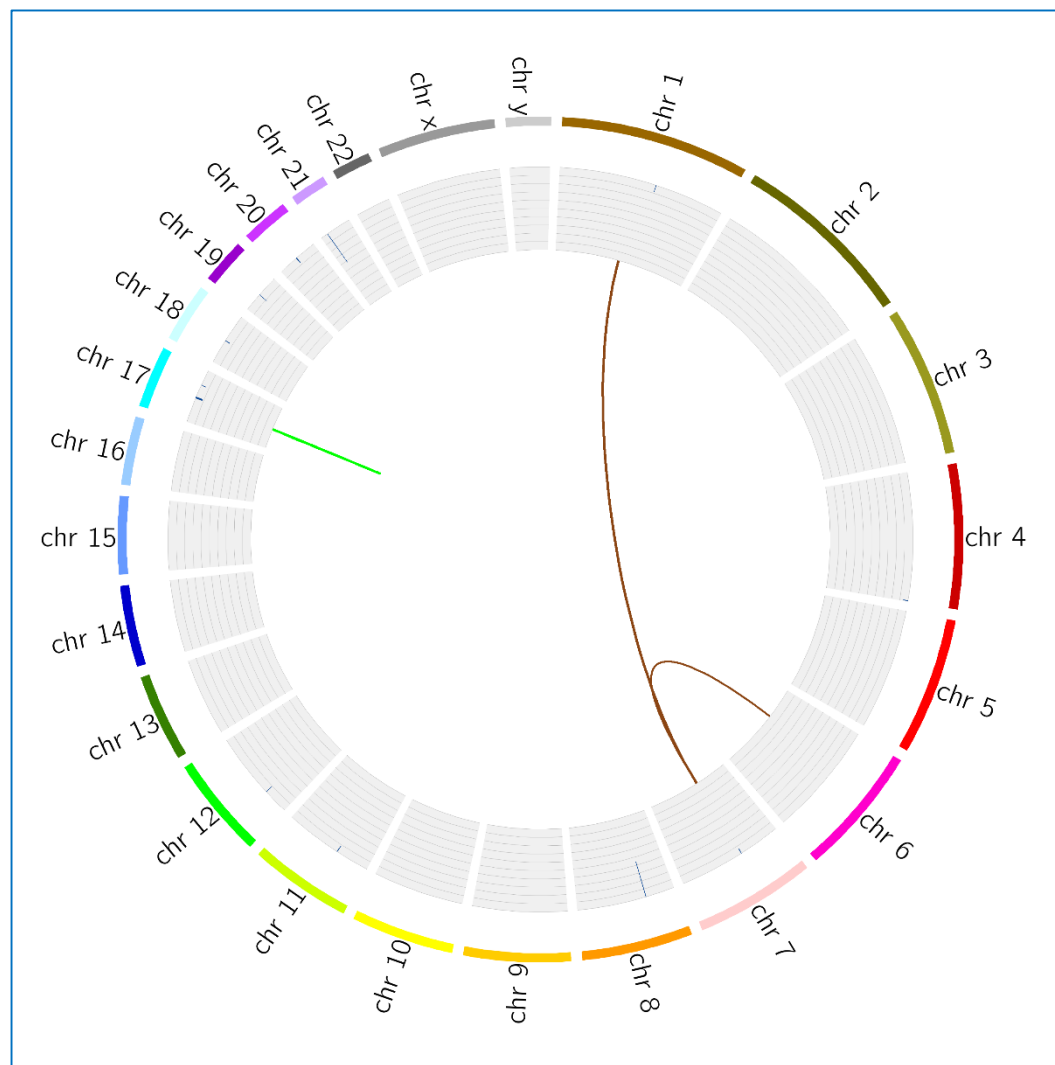

FAST – Whole Genome



p-102

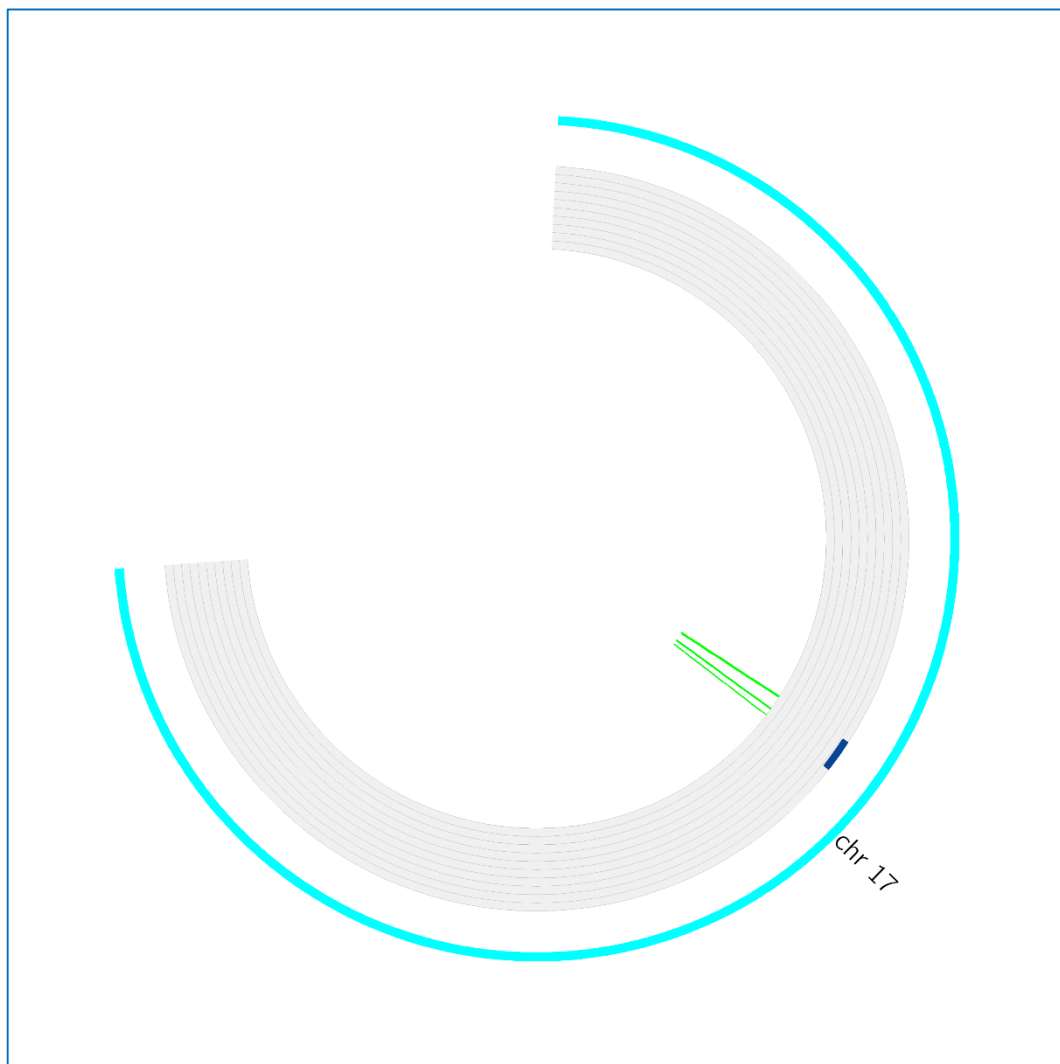

FAST – ERBB2 amplicon

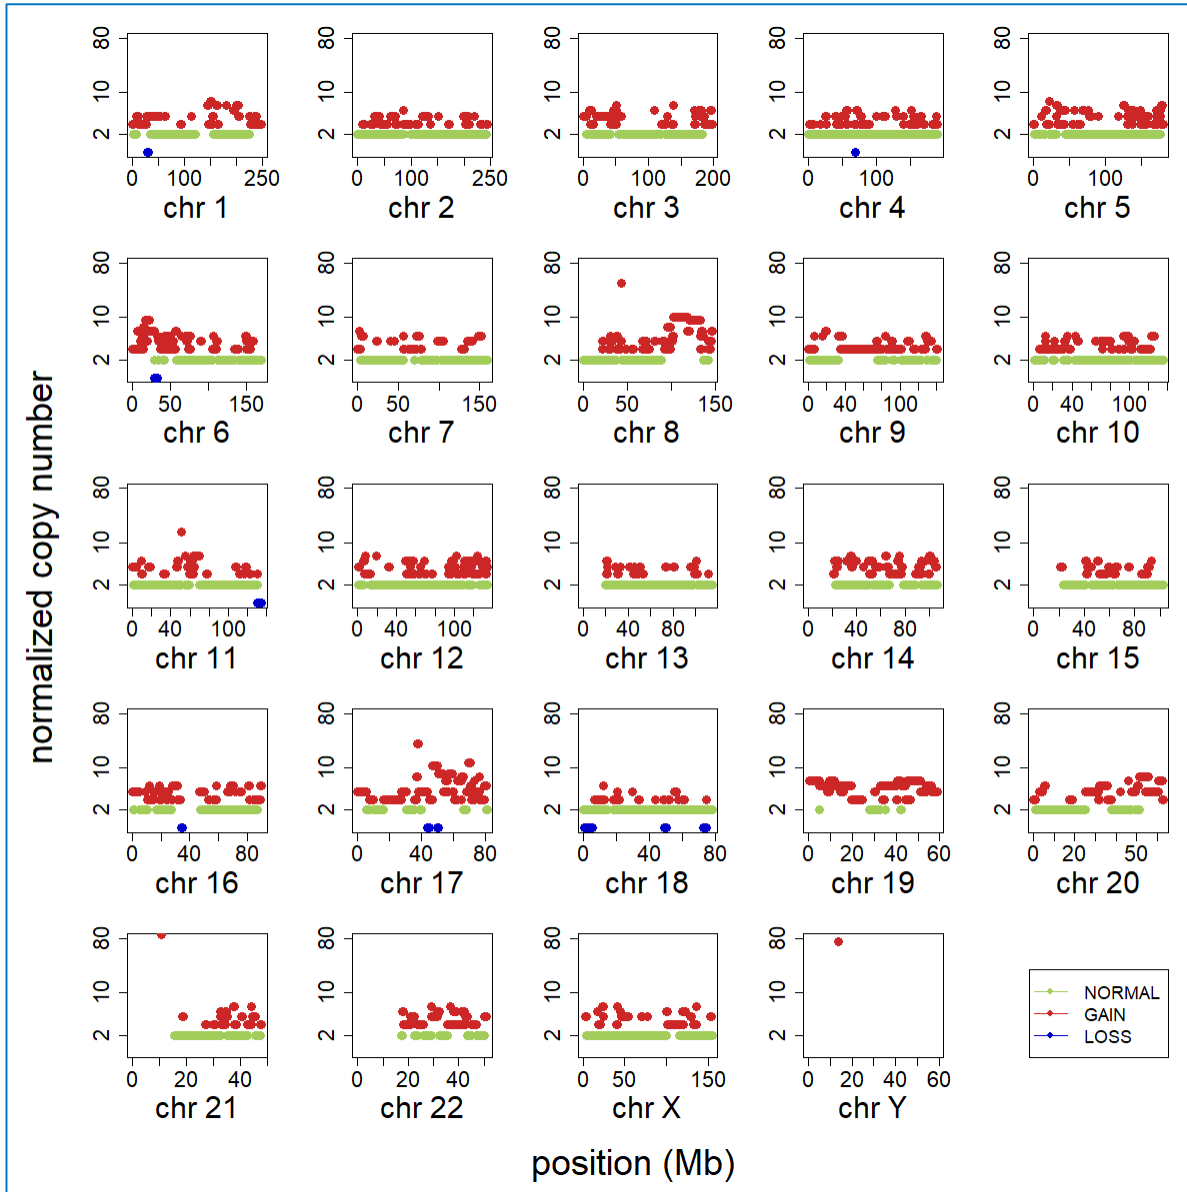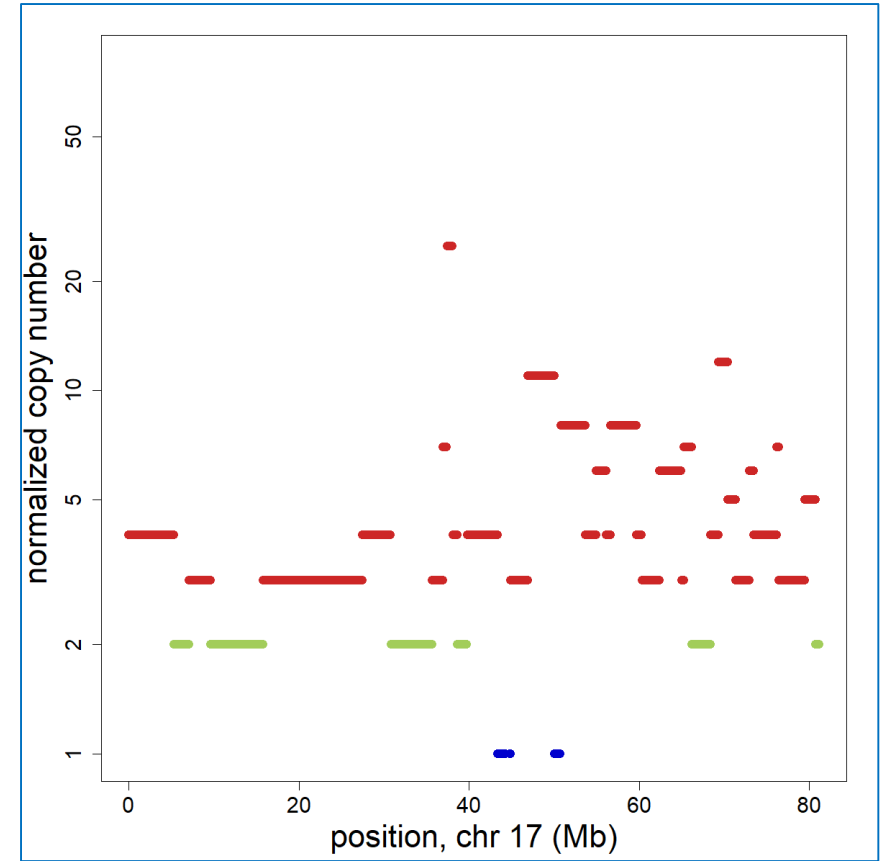

p-103

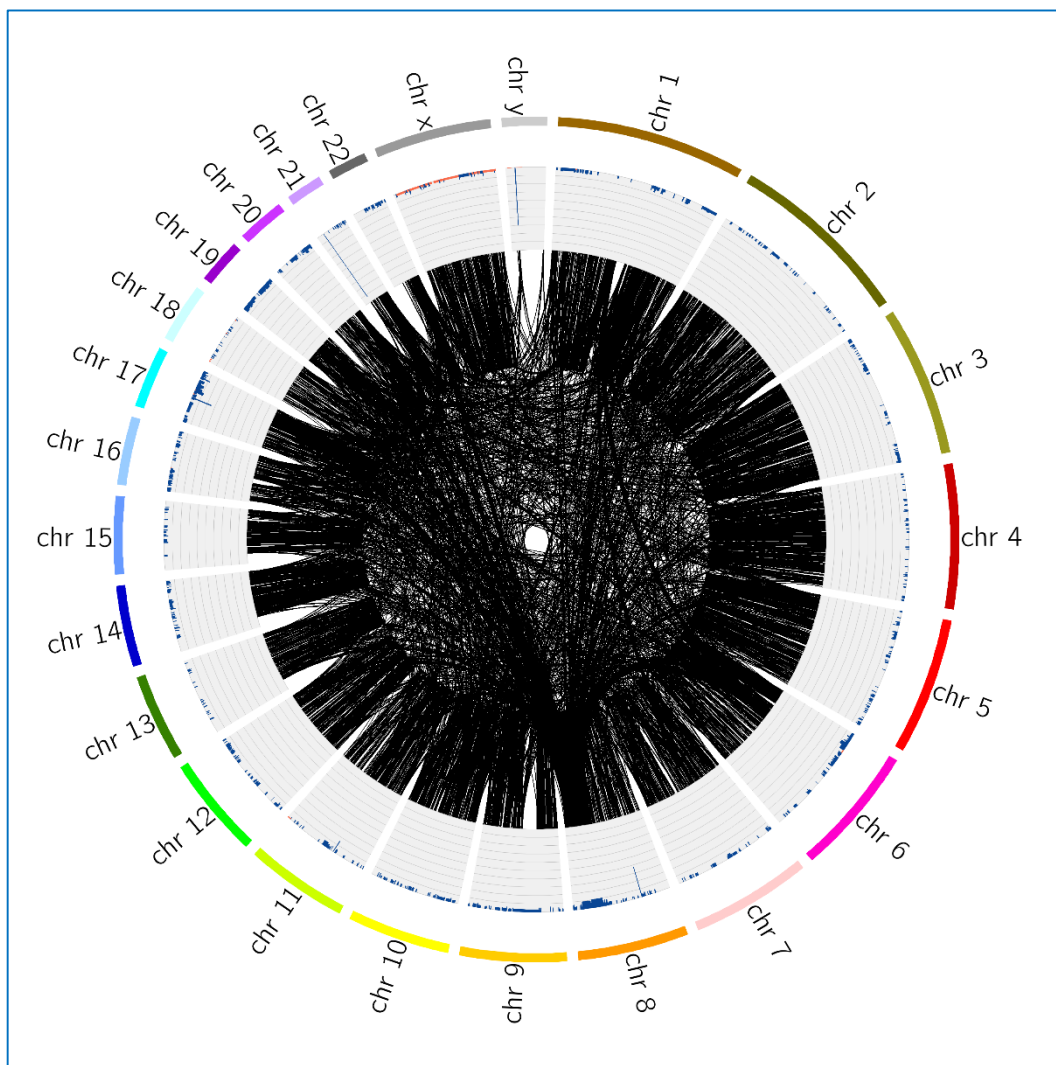

BreakDancer + Control-FREEC

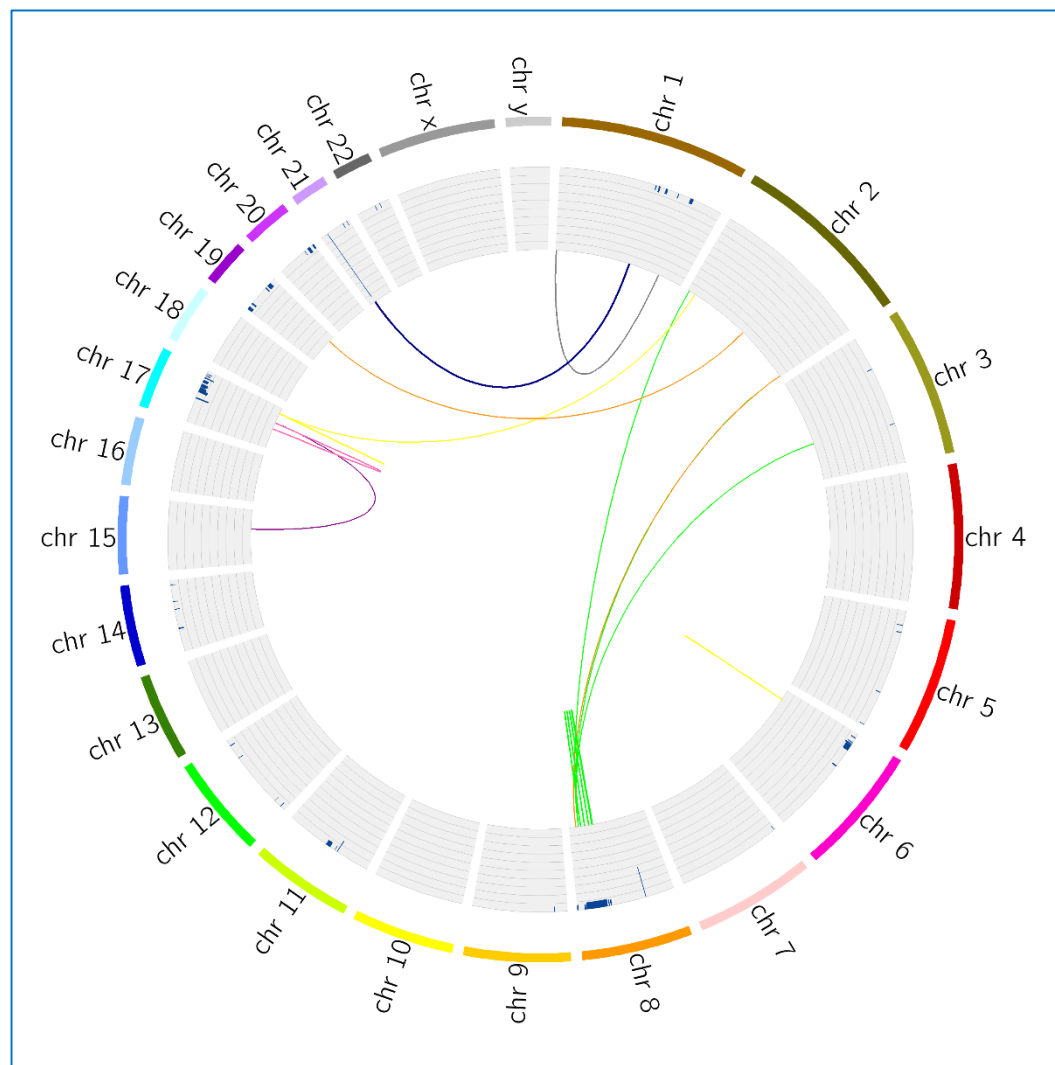

FAST - Whole Genome

p-103

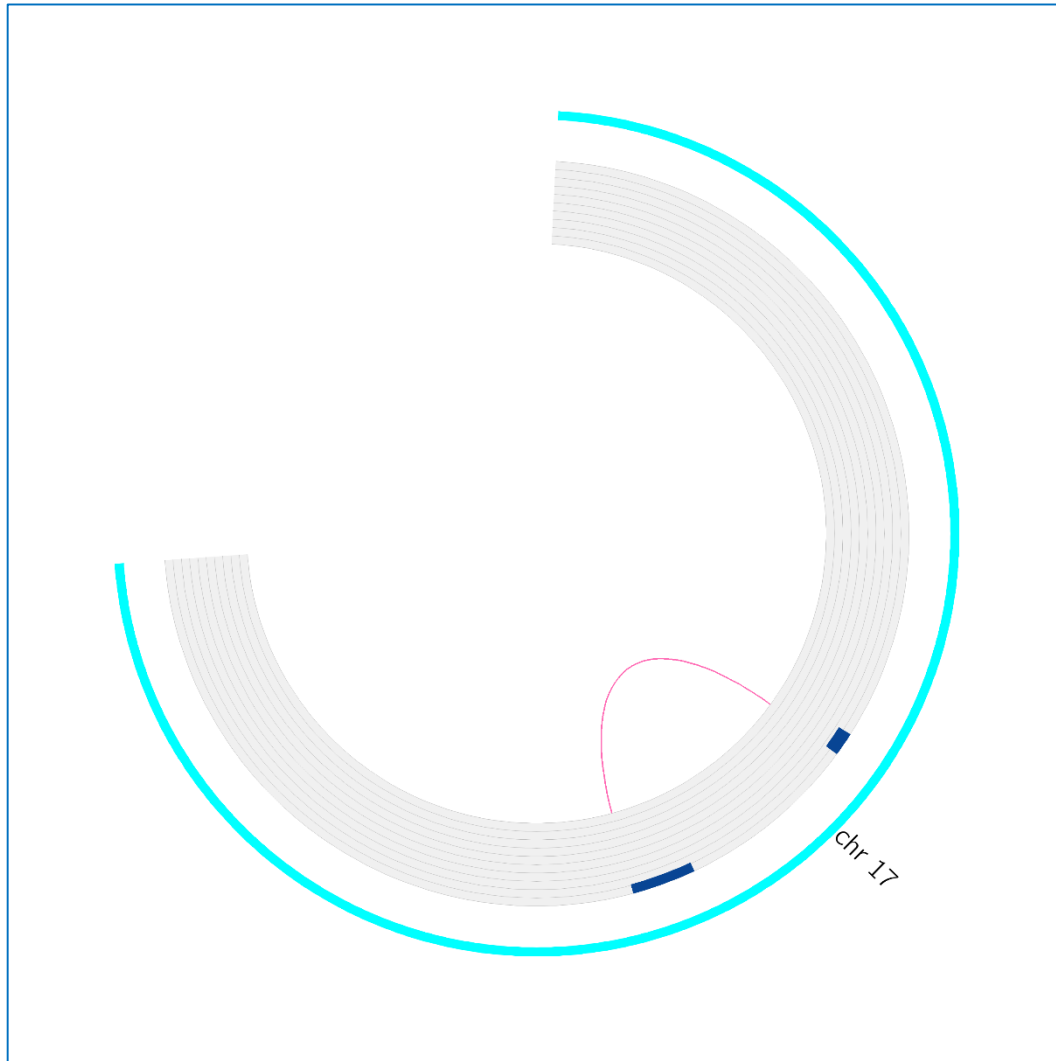

FAST – ERBB2 amplicon

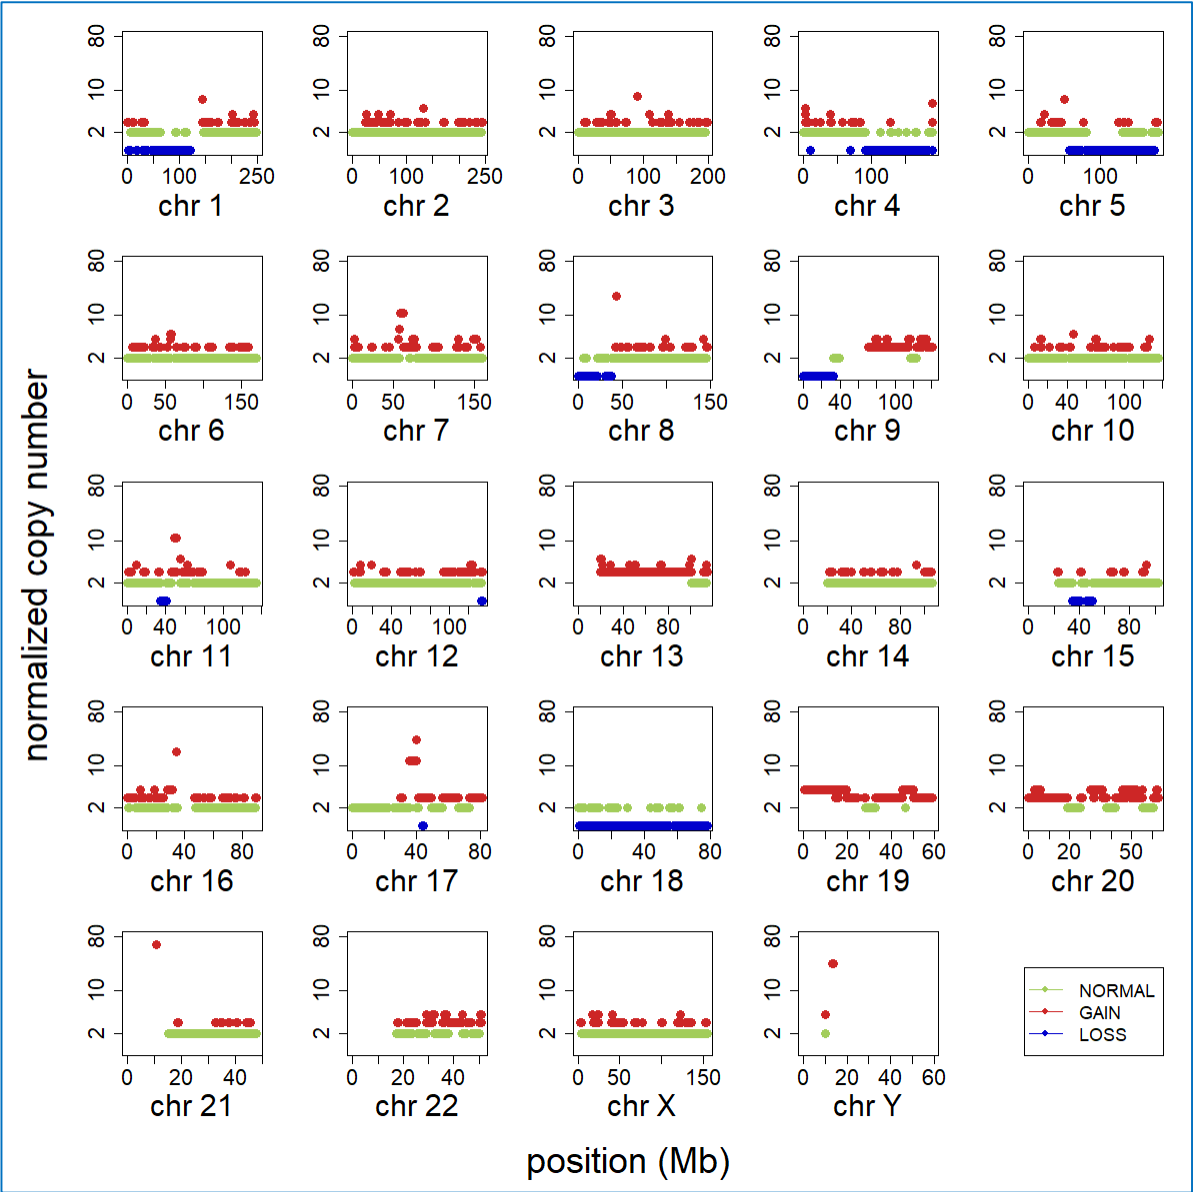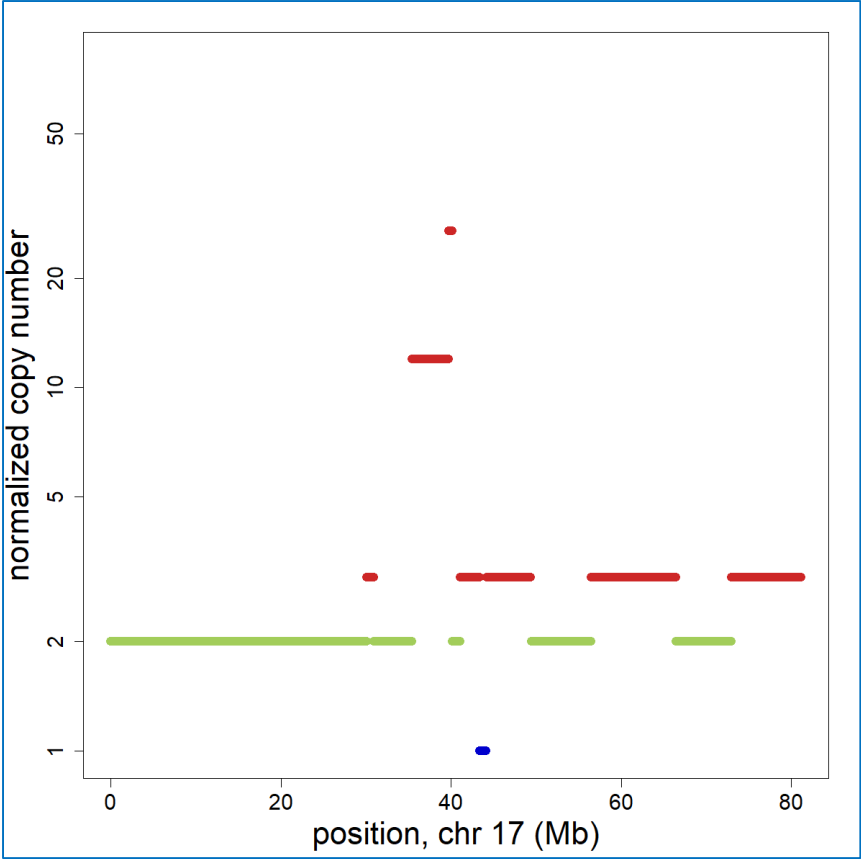

Control-FREEC

p-104

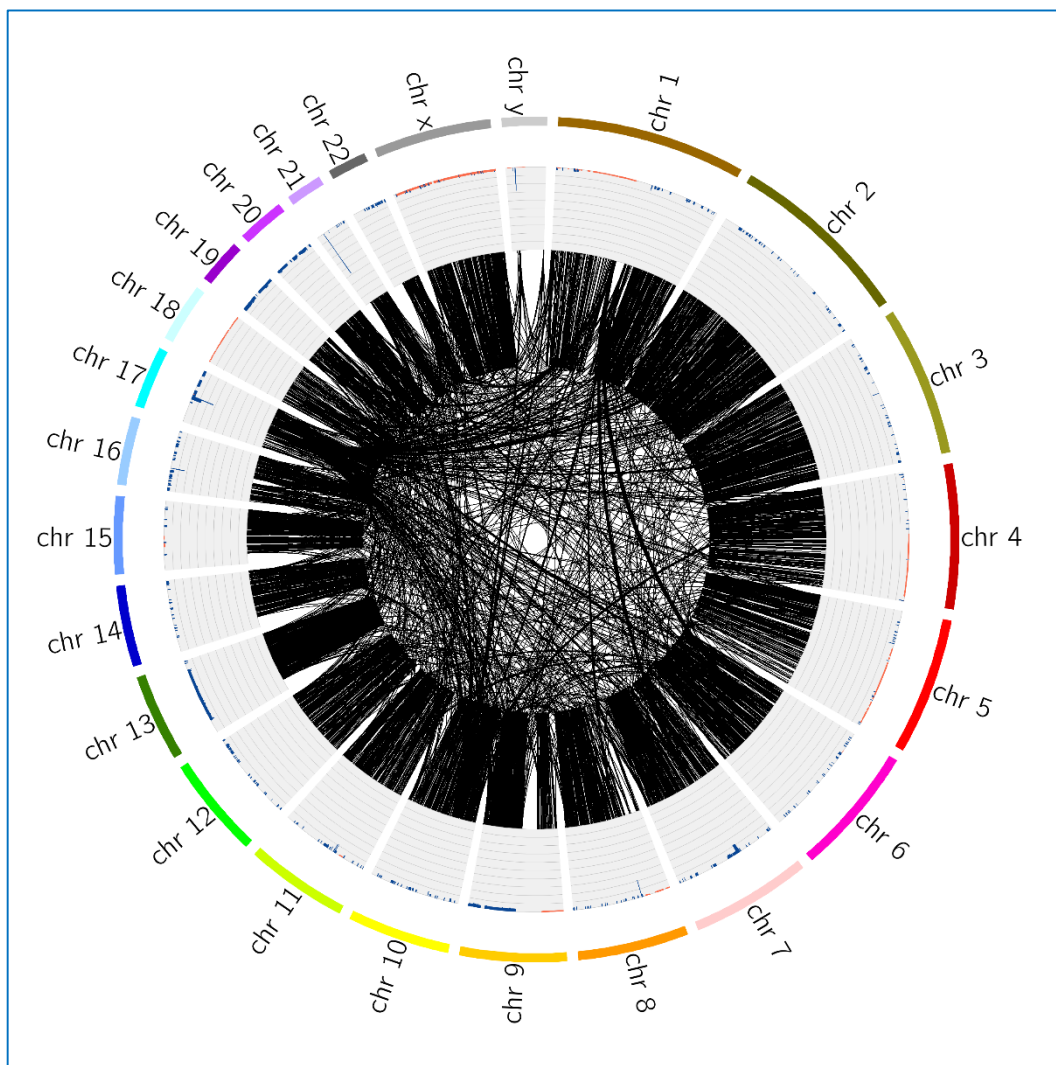

BreakDancer + Control-FREEC

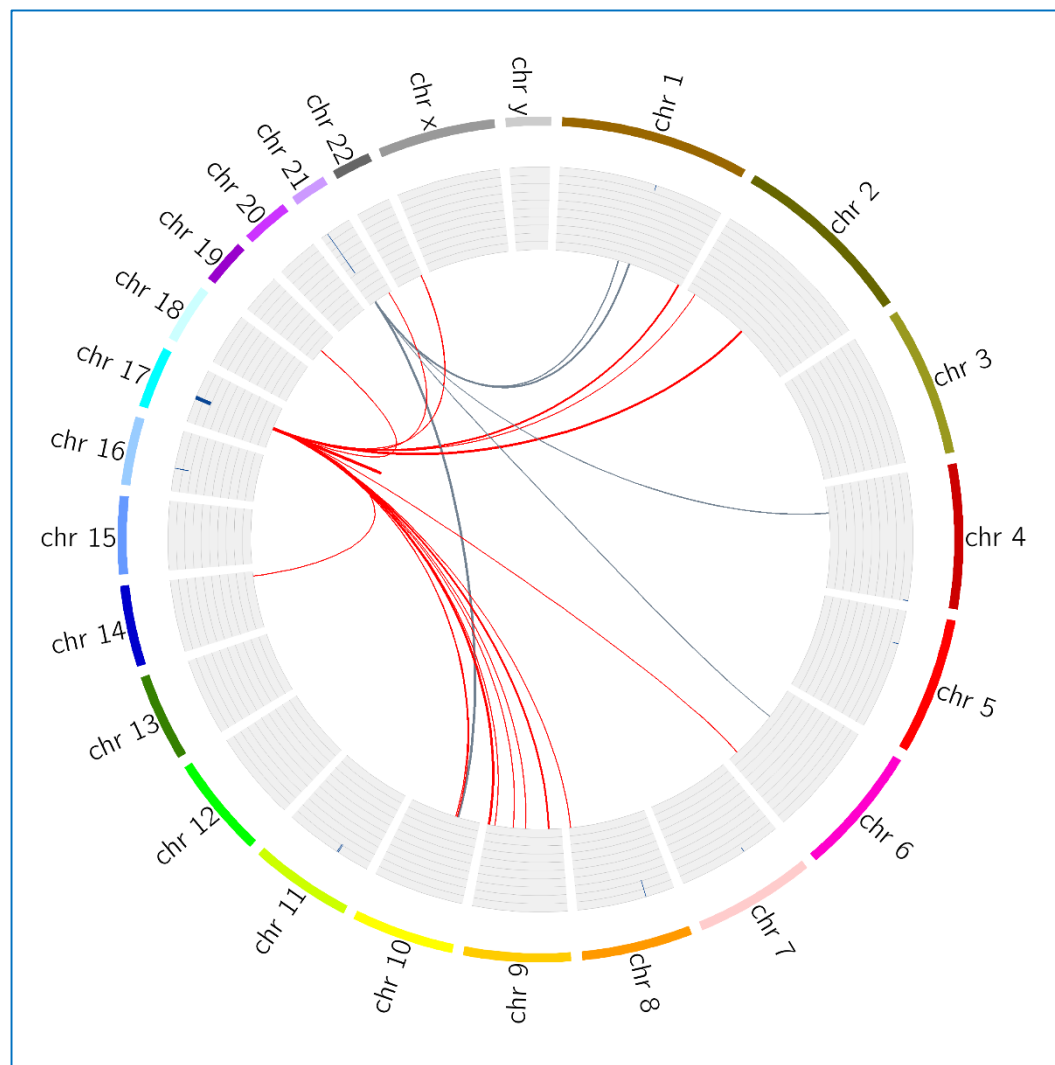

FAST - Whole Genome

p-104

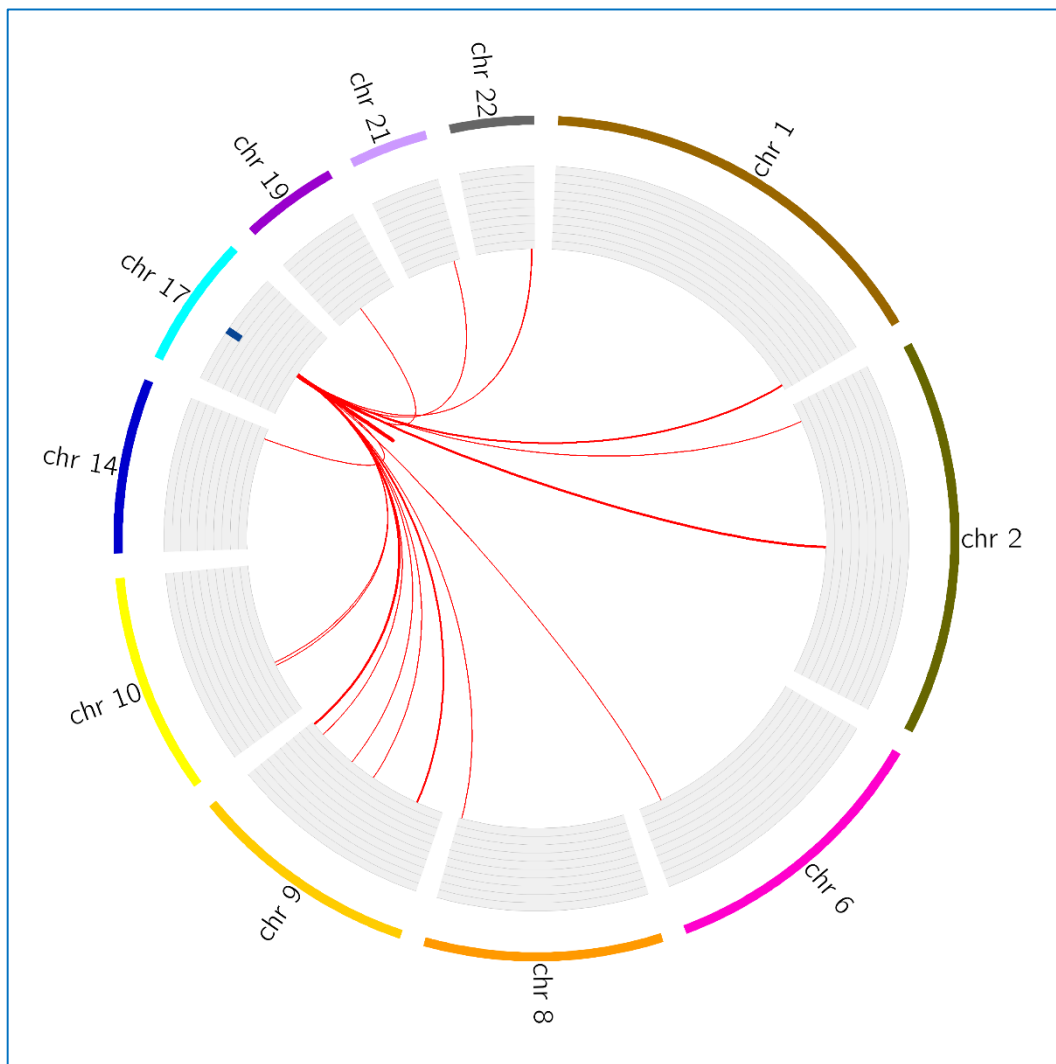

FAST – ERBB2 amplicon

p-106

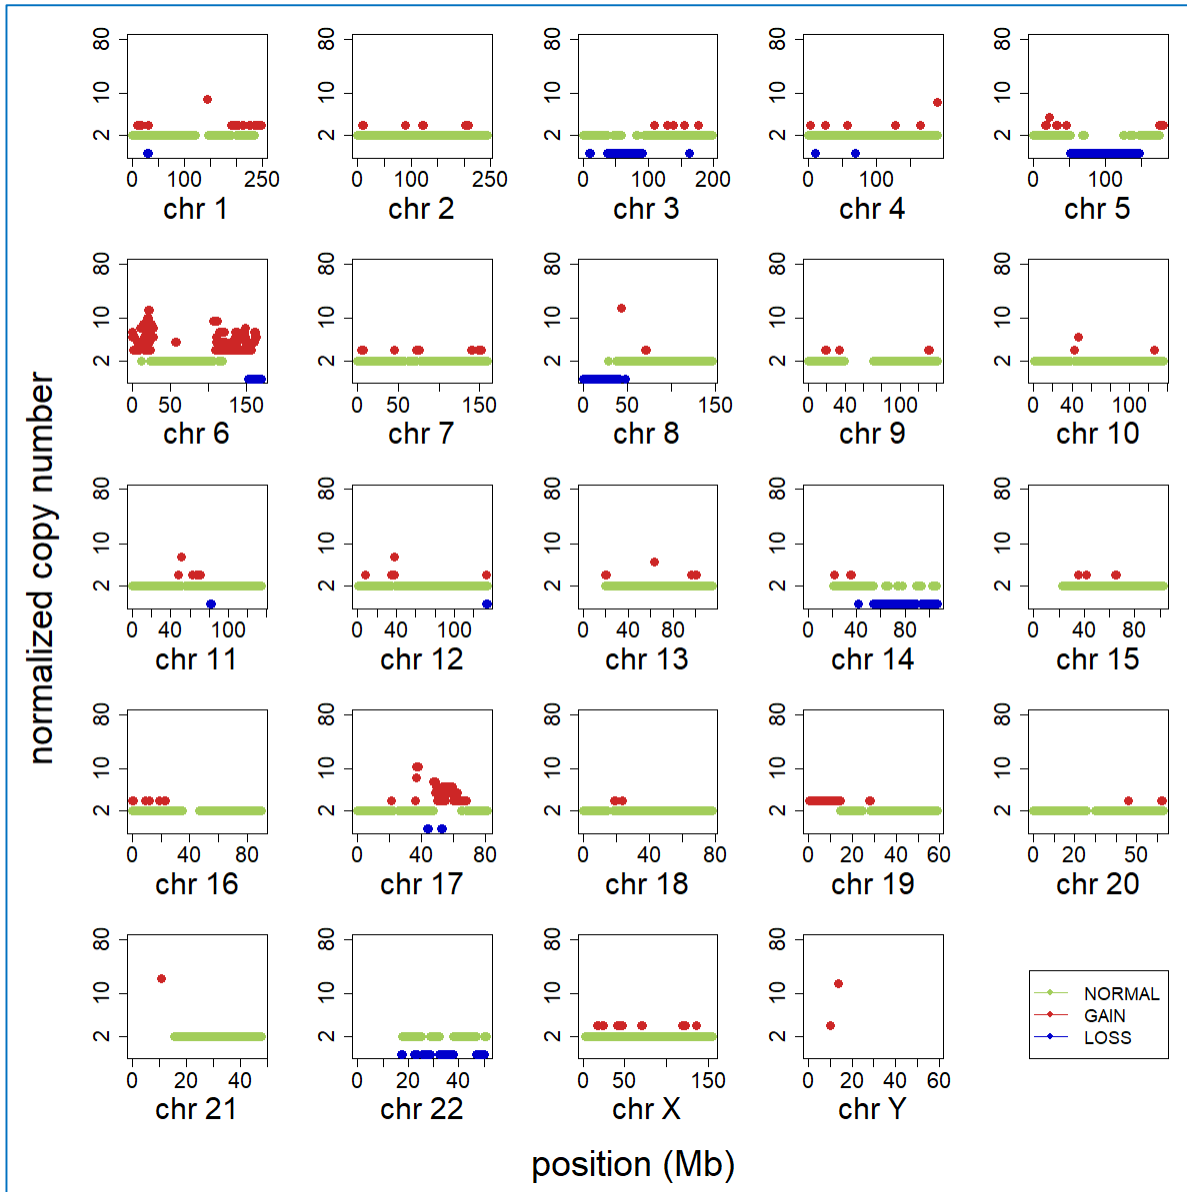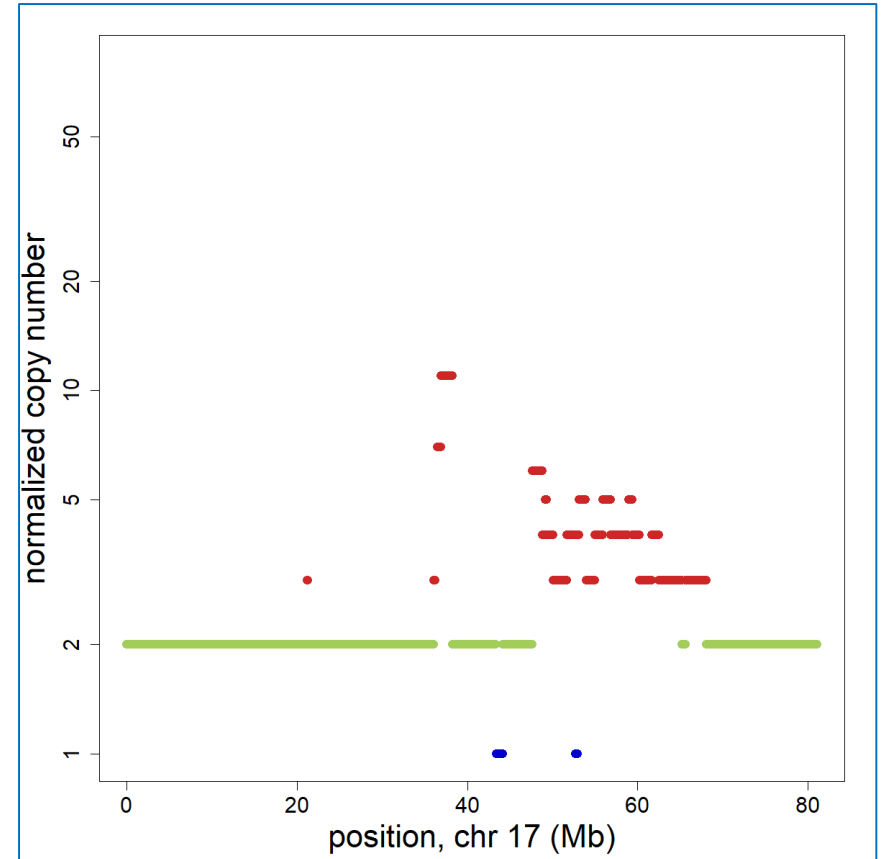

Control-FREEC



p-106

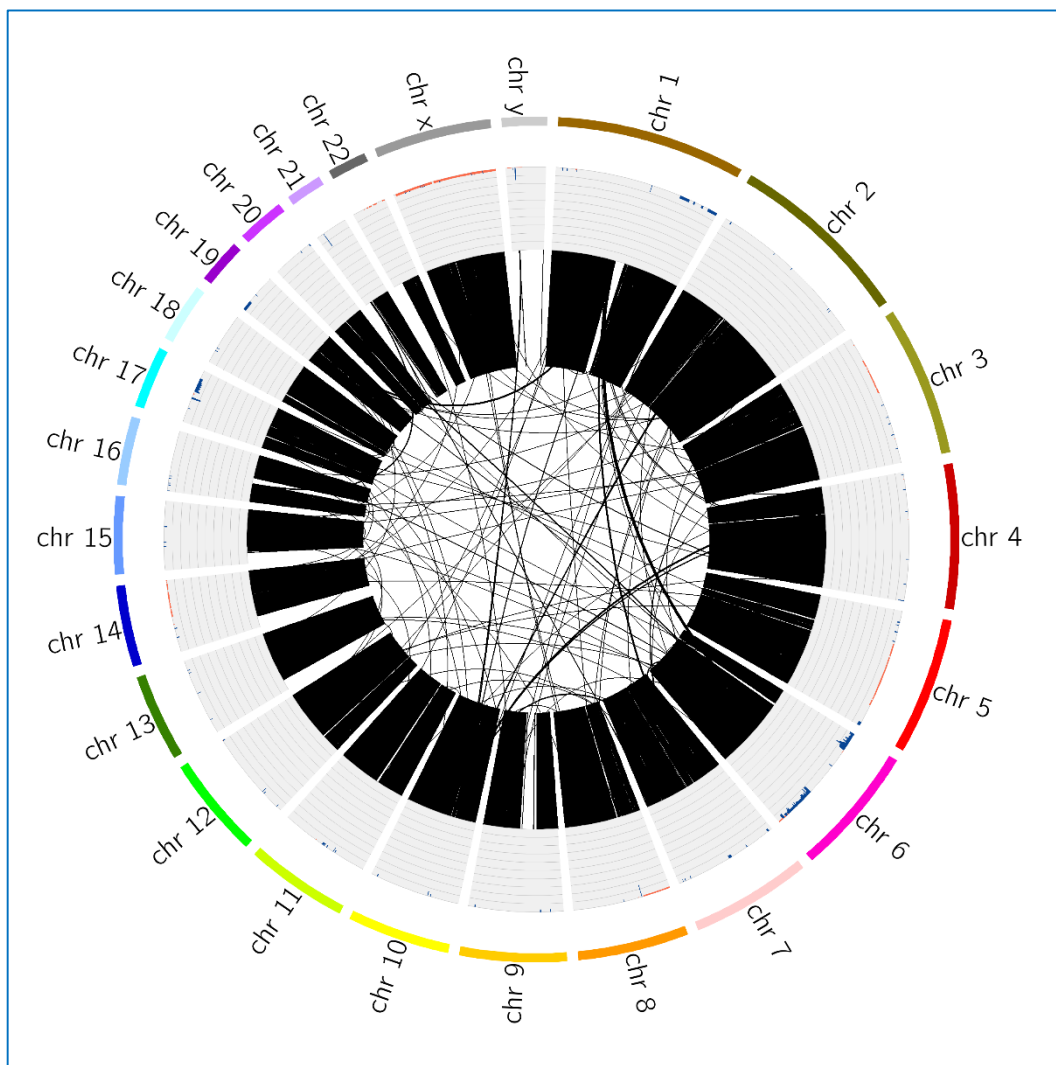

BreakDancer + Control-FREEC

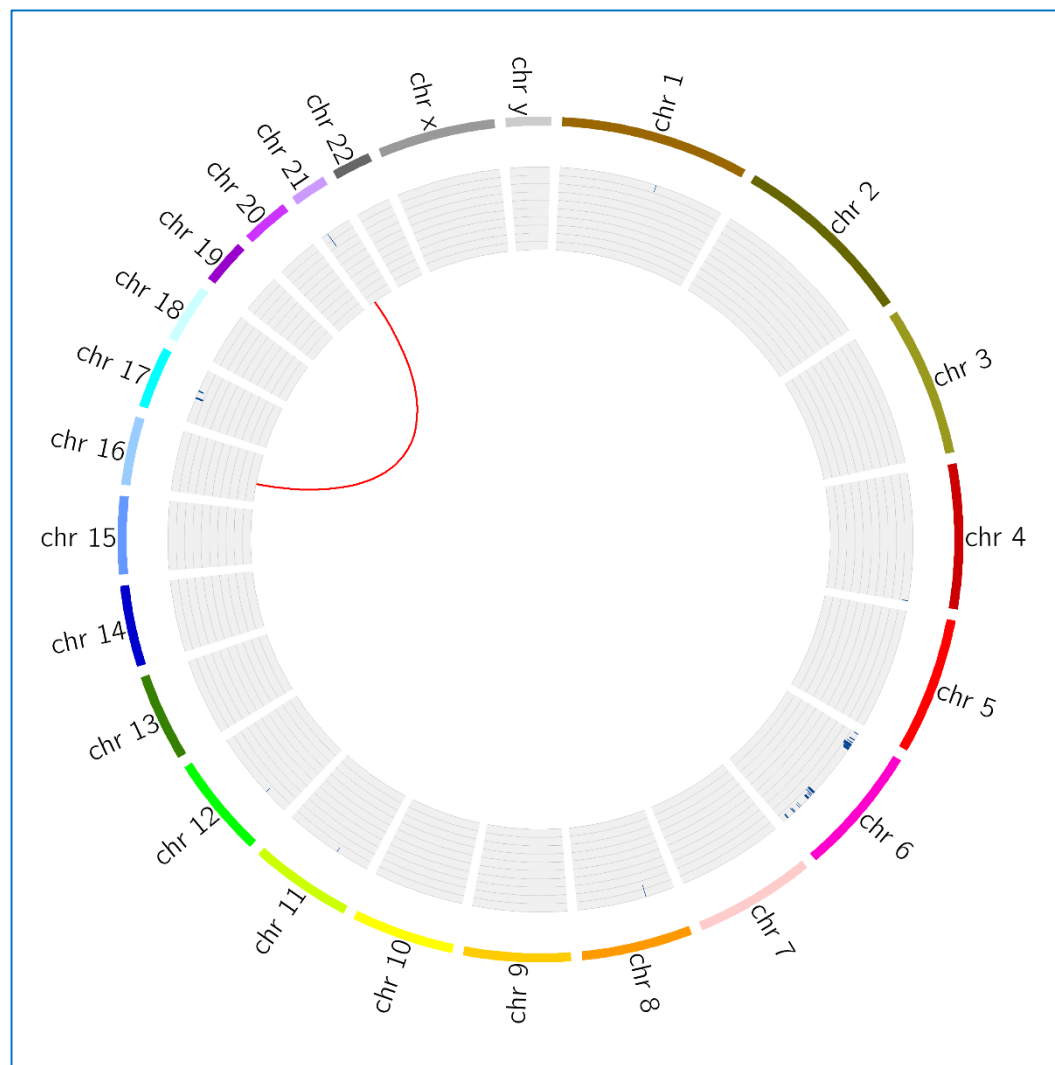

FAST - Whole Genome

p-106

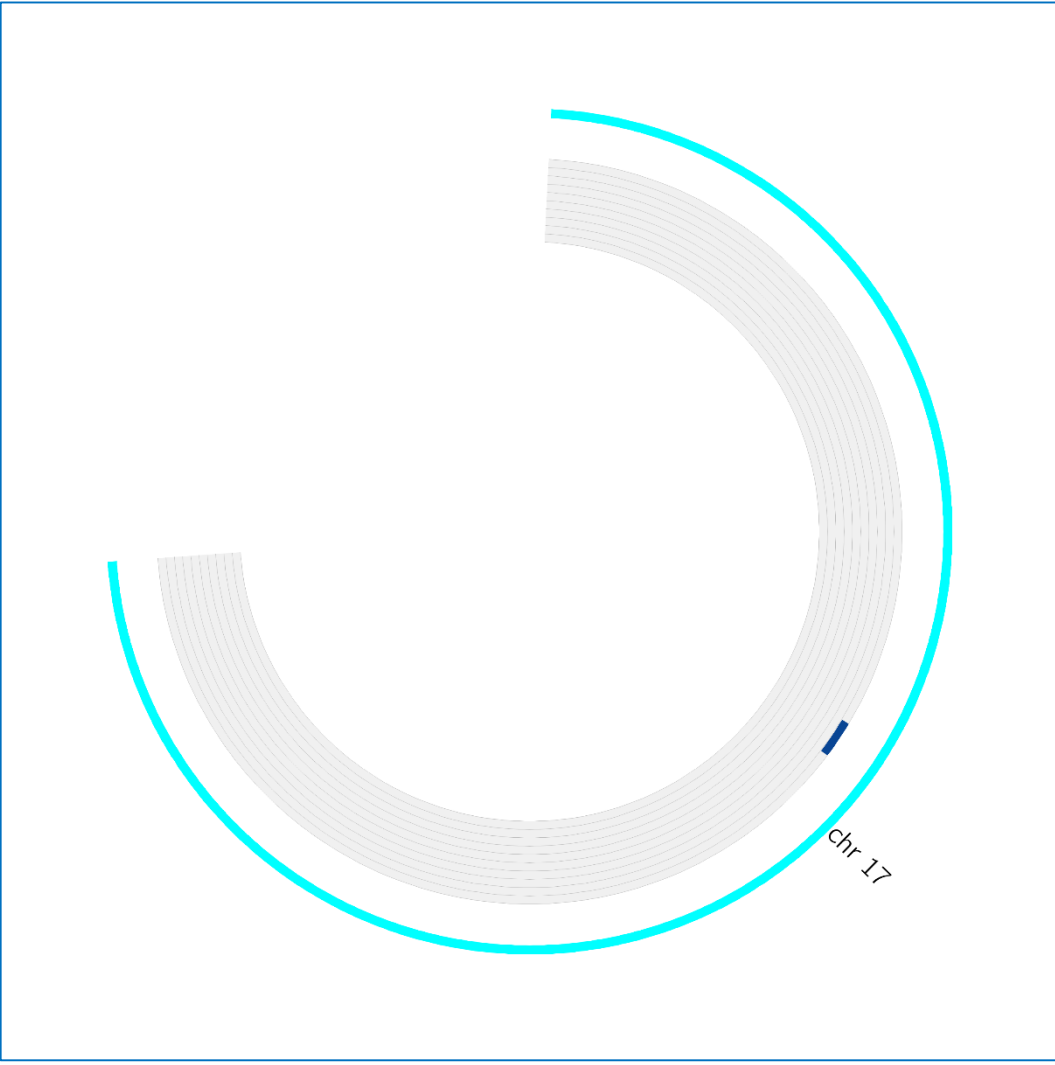

FAST – ERBB2 amplicon

p-108

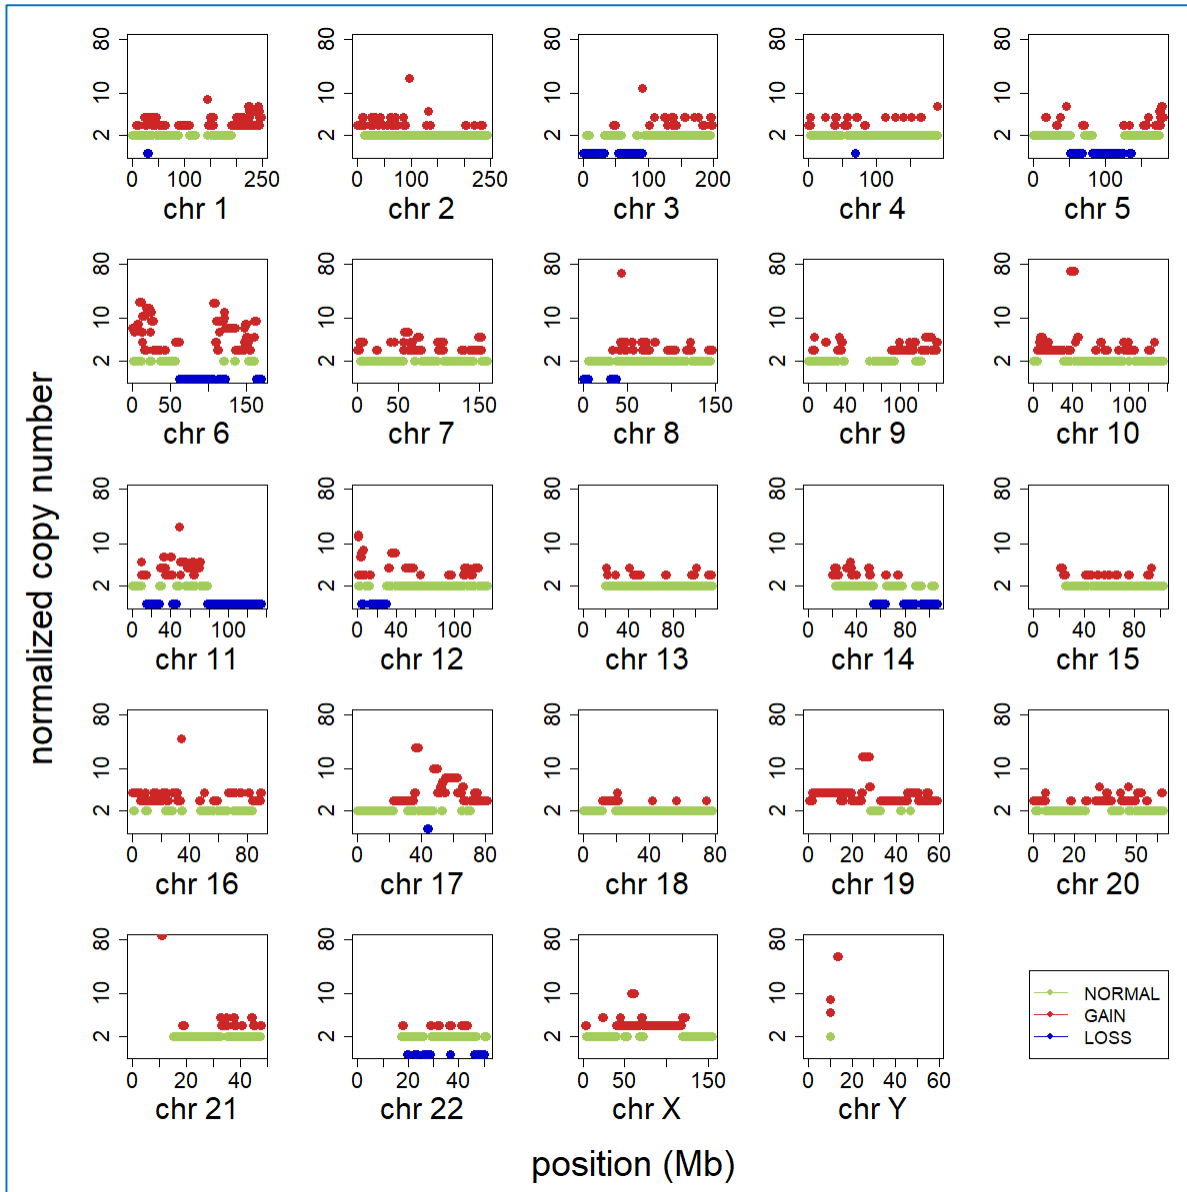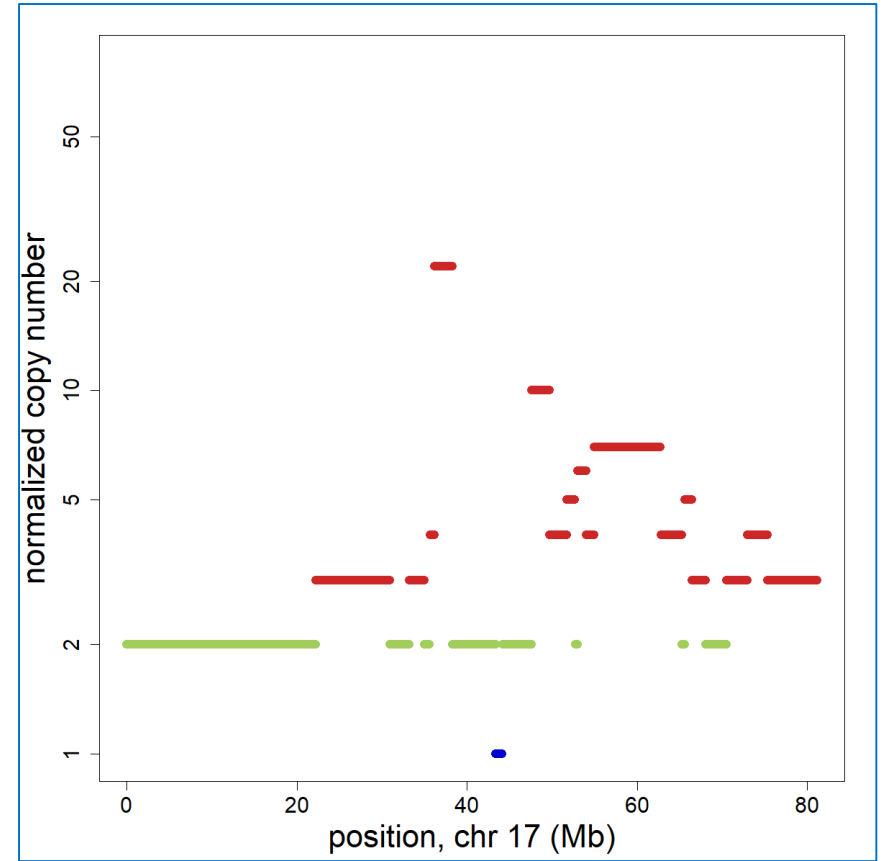

Control-FREEC

p-108

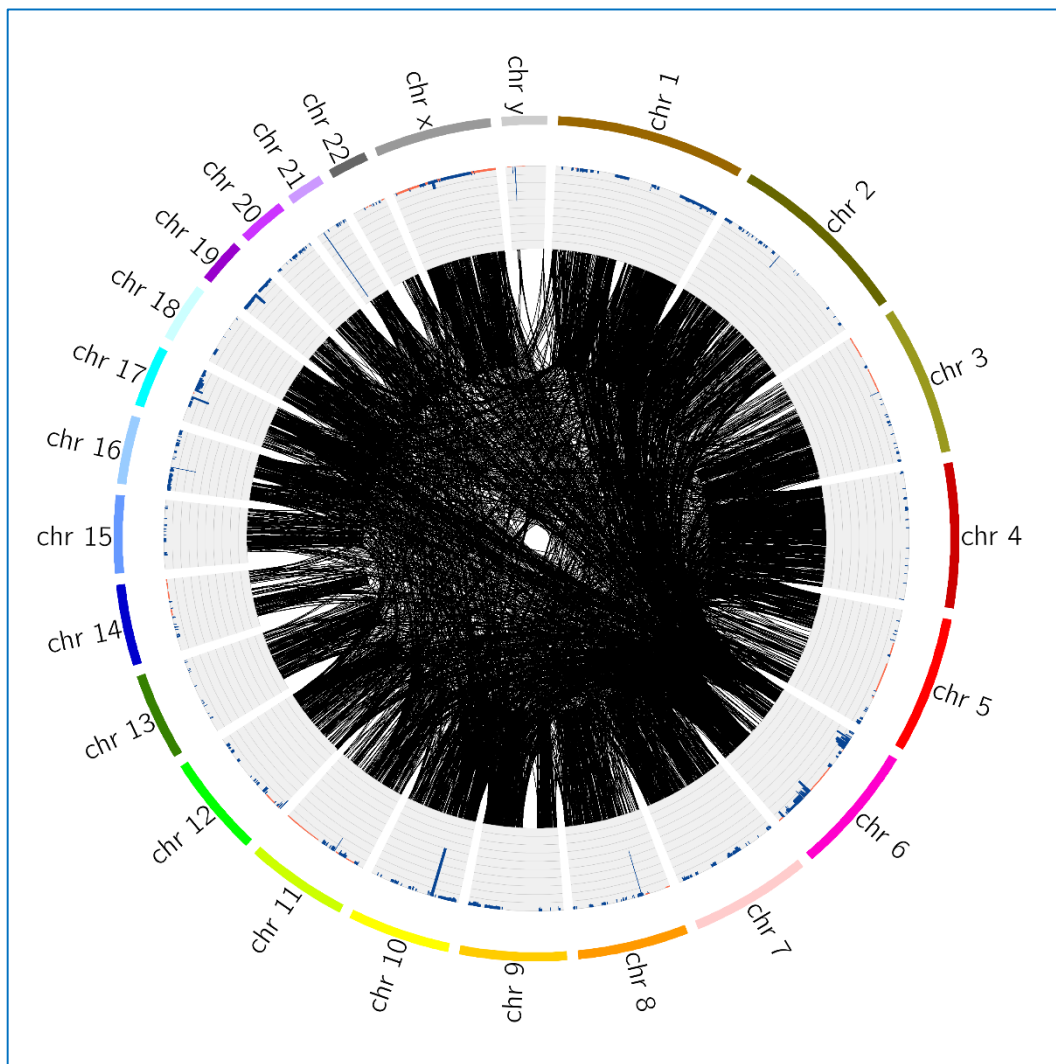

BreakDancer + Control-FREEC

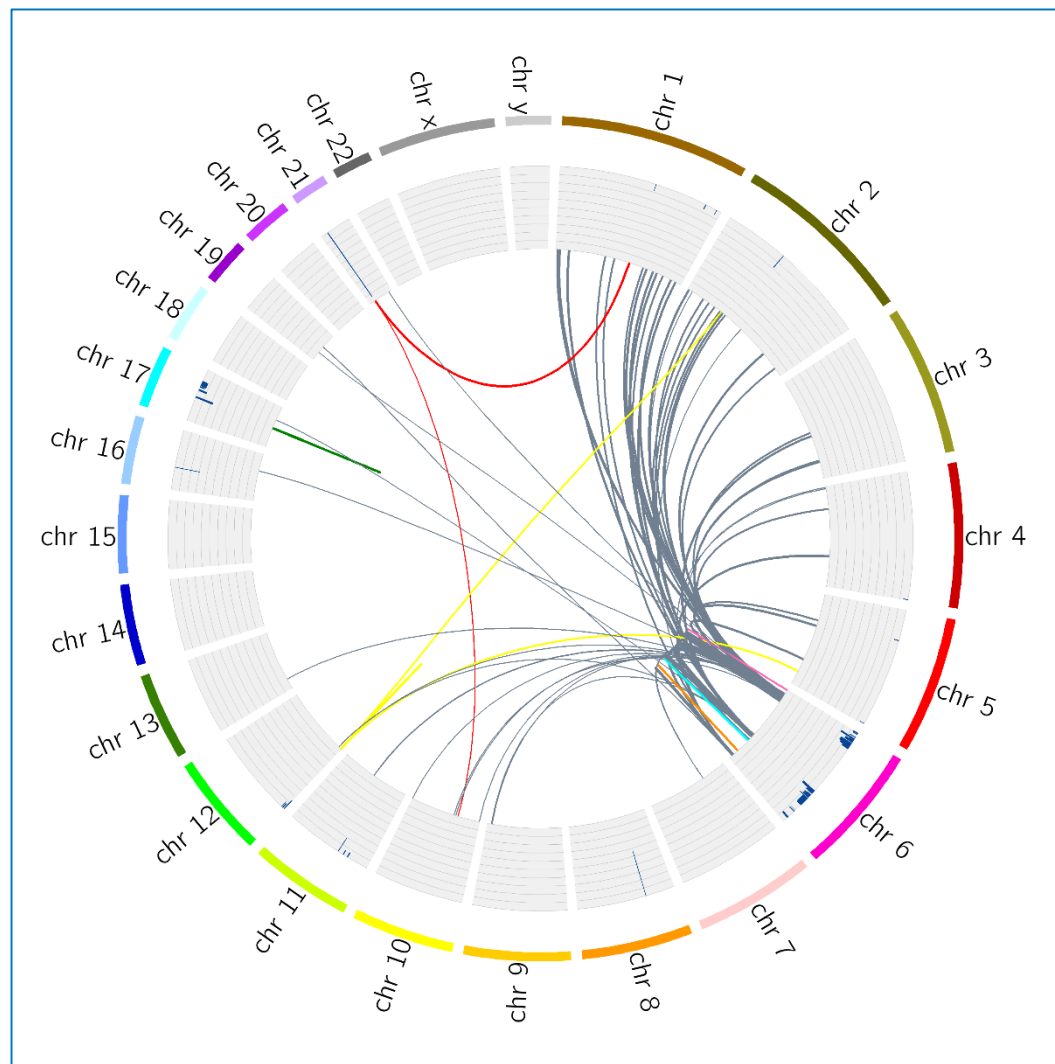

FAST - Whole Genome

p-108

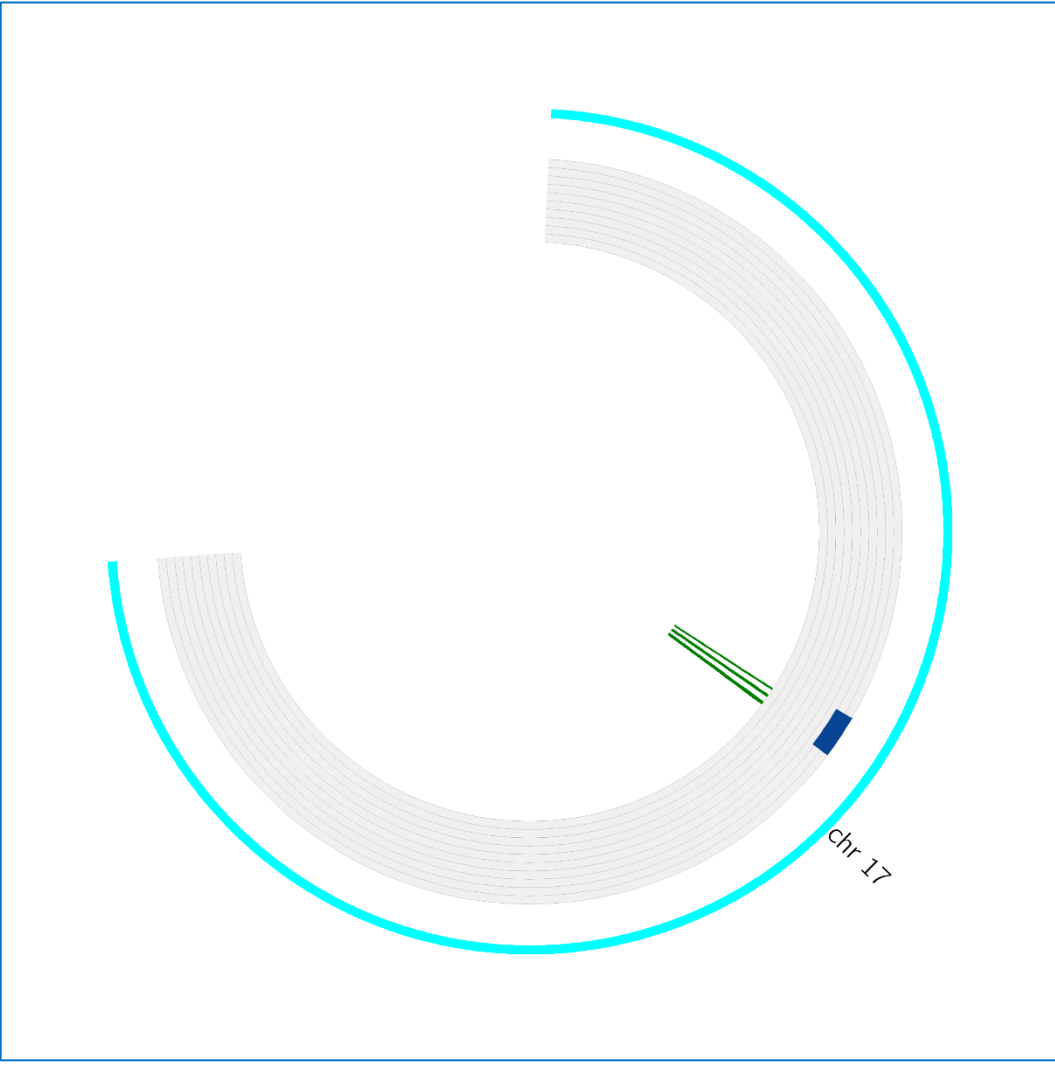

FAST – ERBB2 amplicon

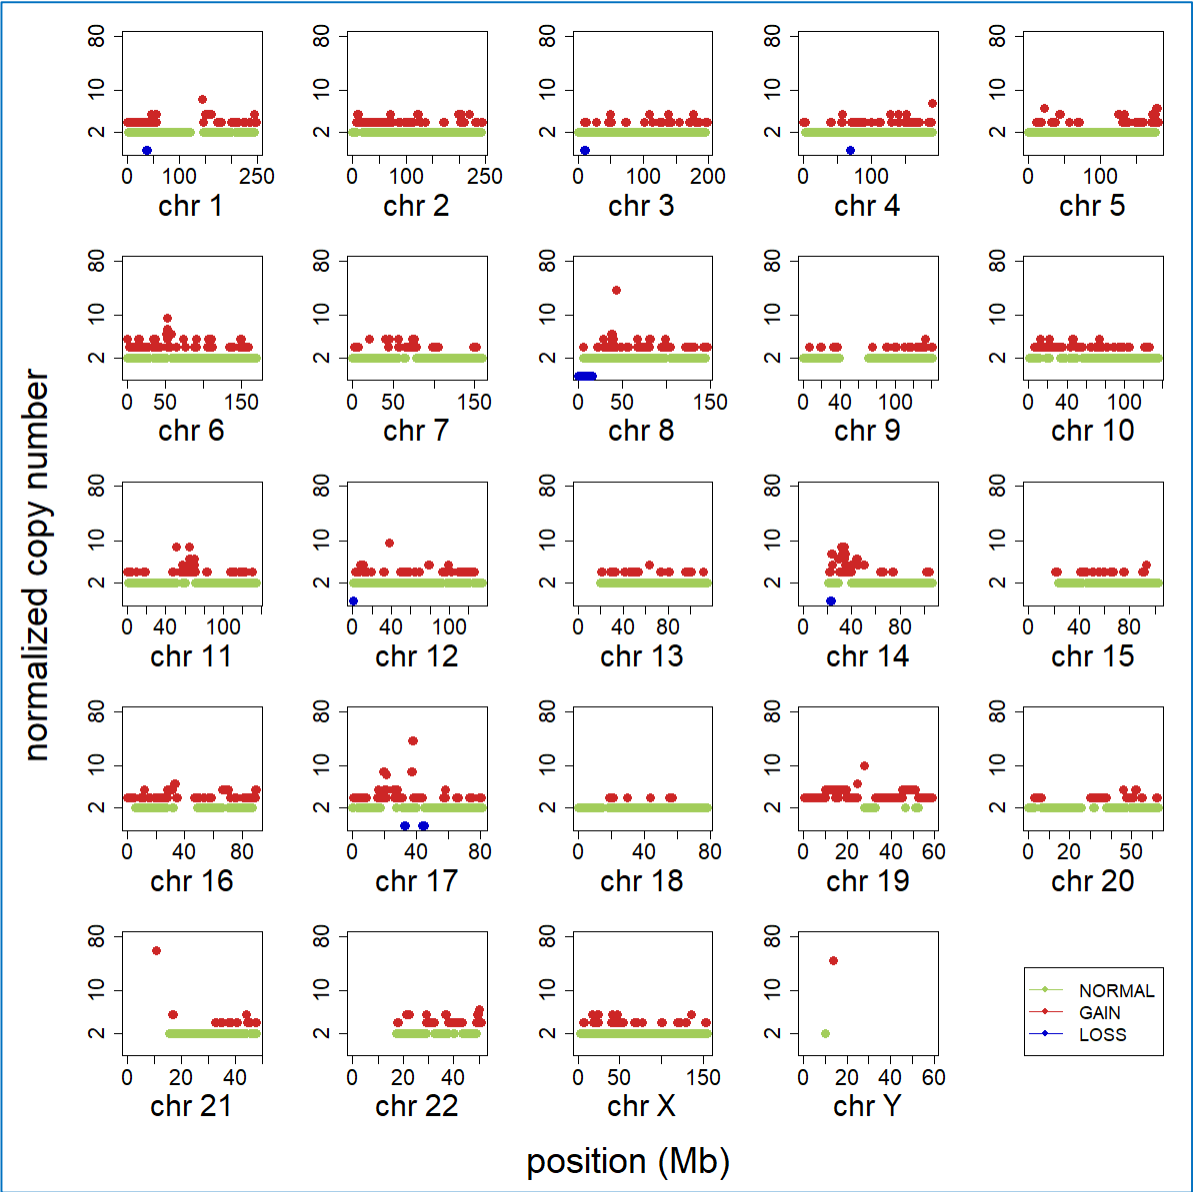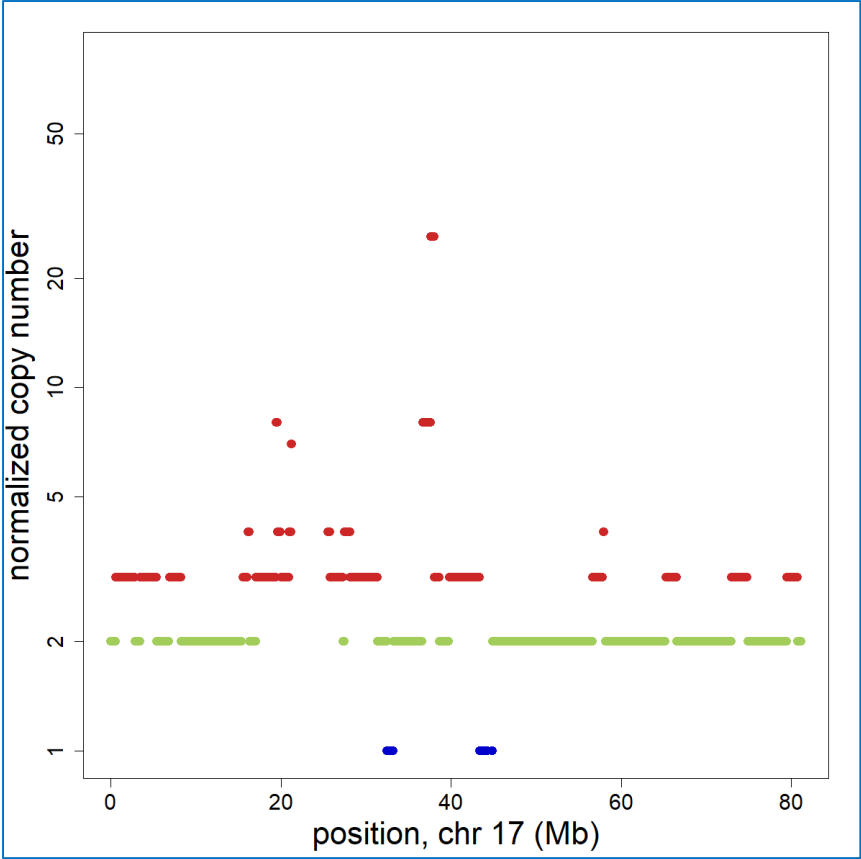

Control-FREEC

p-112

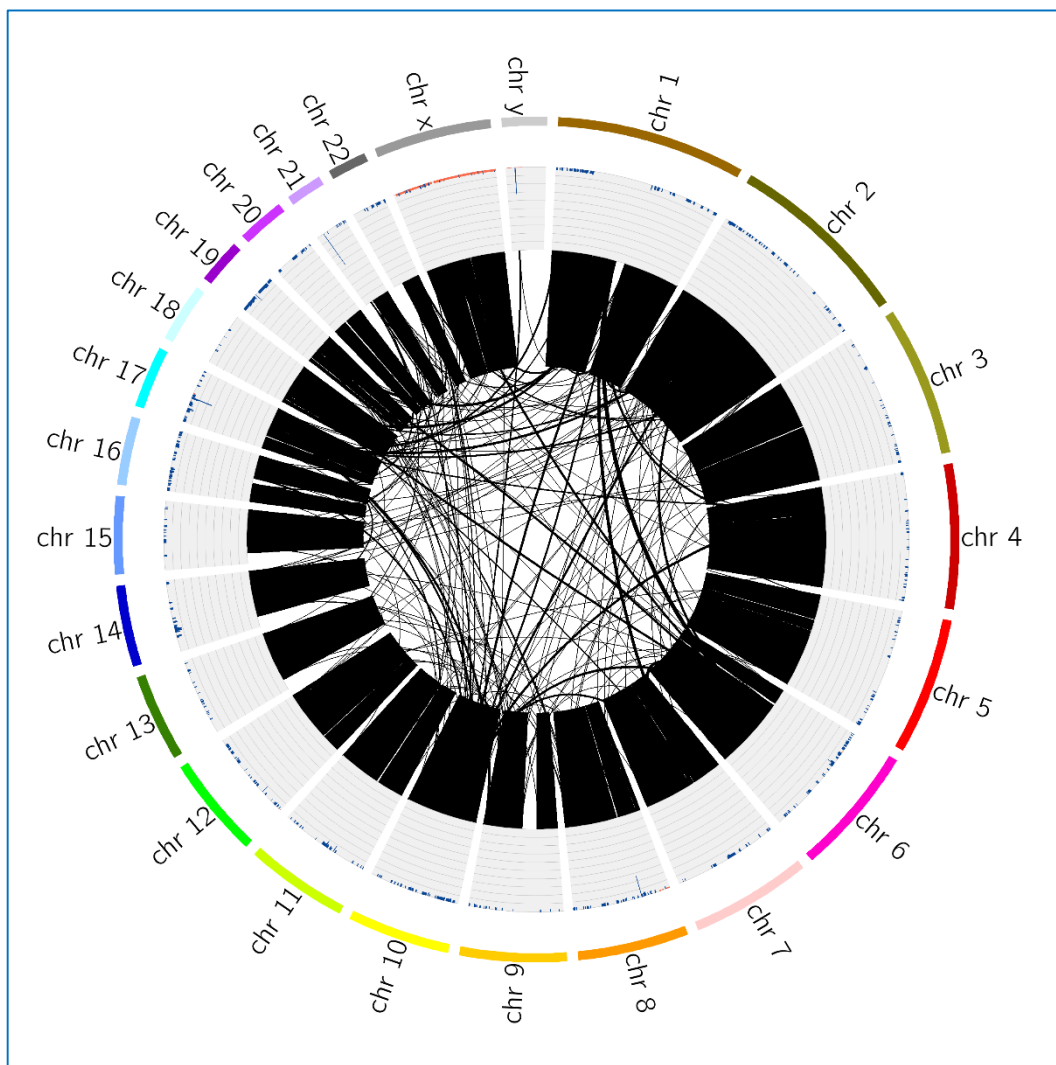

BreakDancer + Control-FREEC

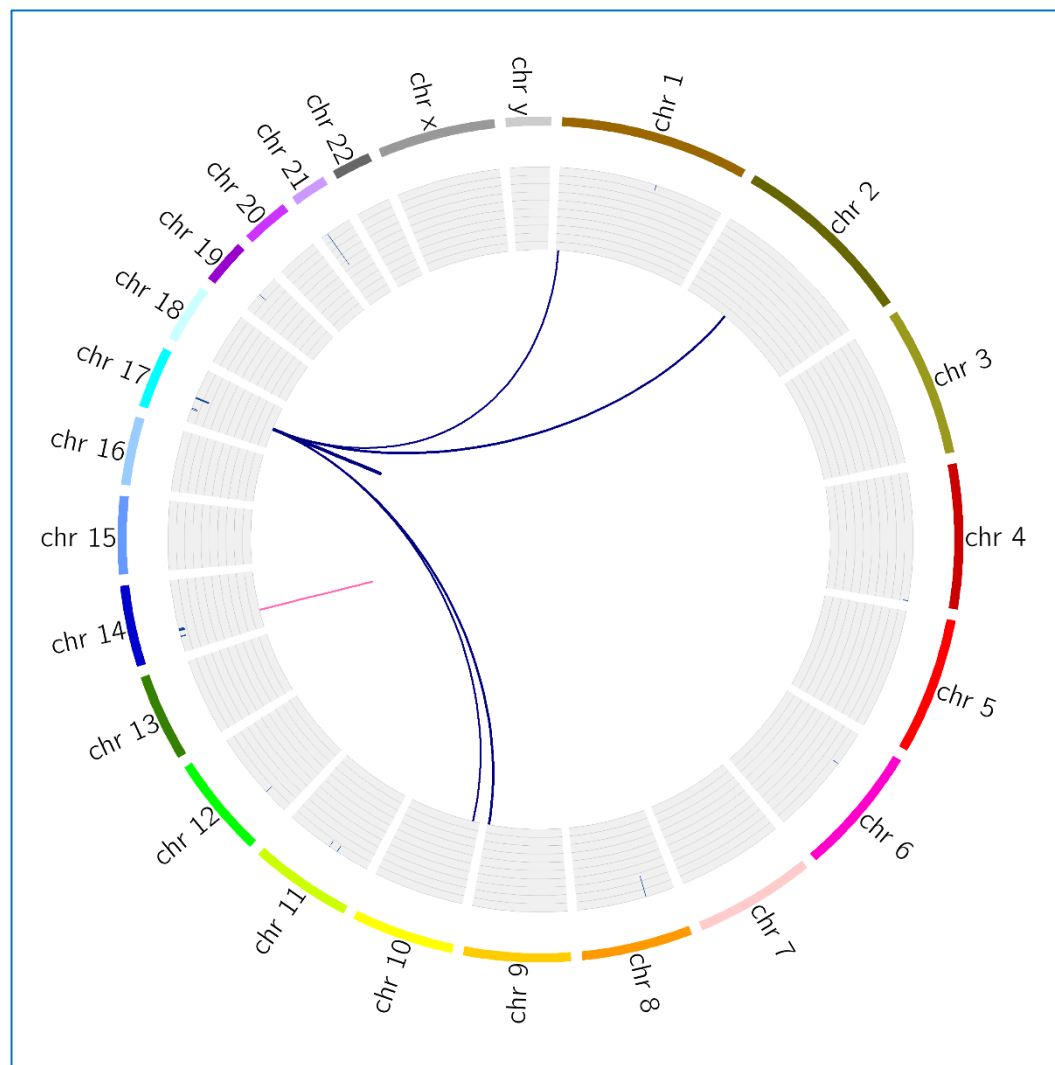

FAST - Whole Genome

p-112

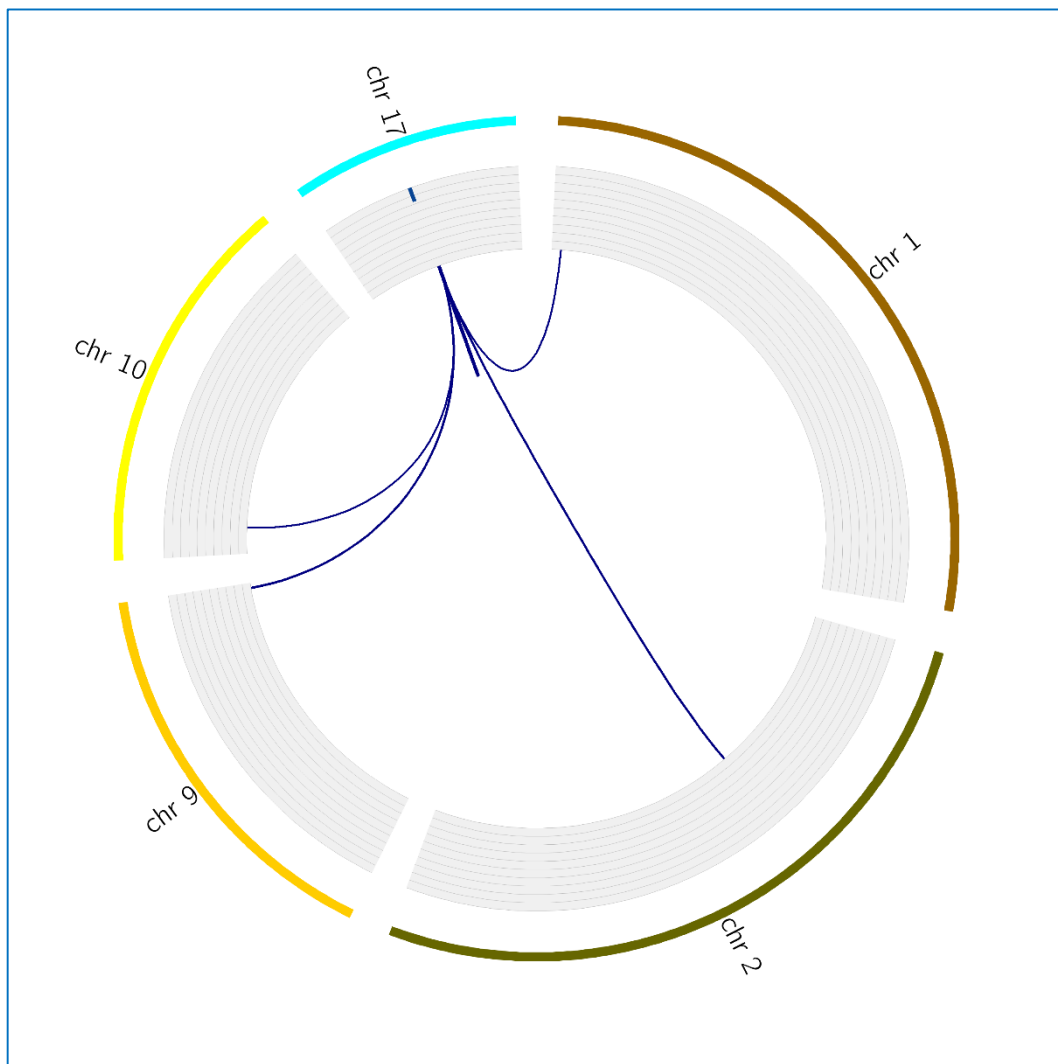

FAST – ERBB2 amplicon



p-114

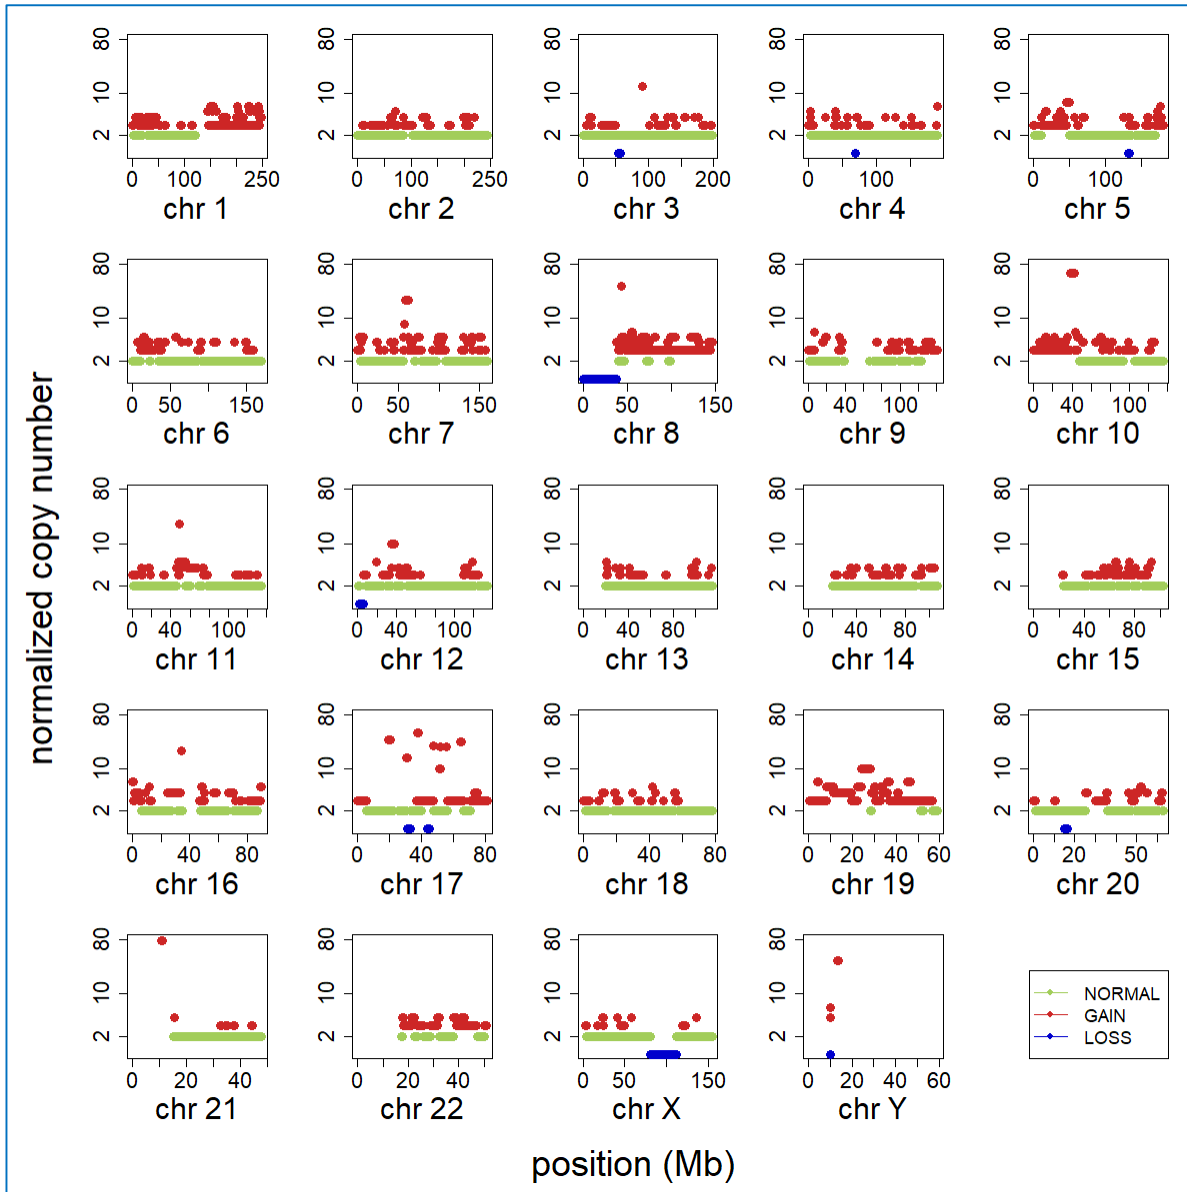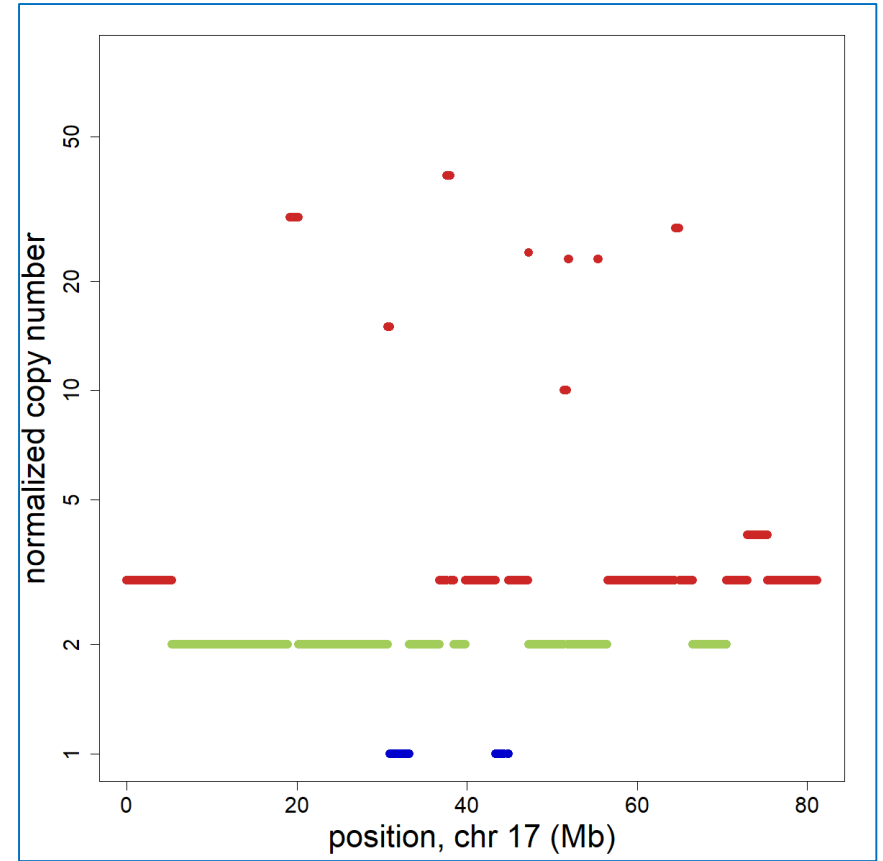

Control-FREEC

p-114

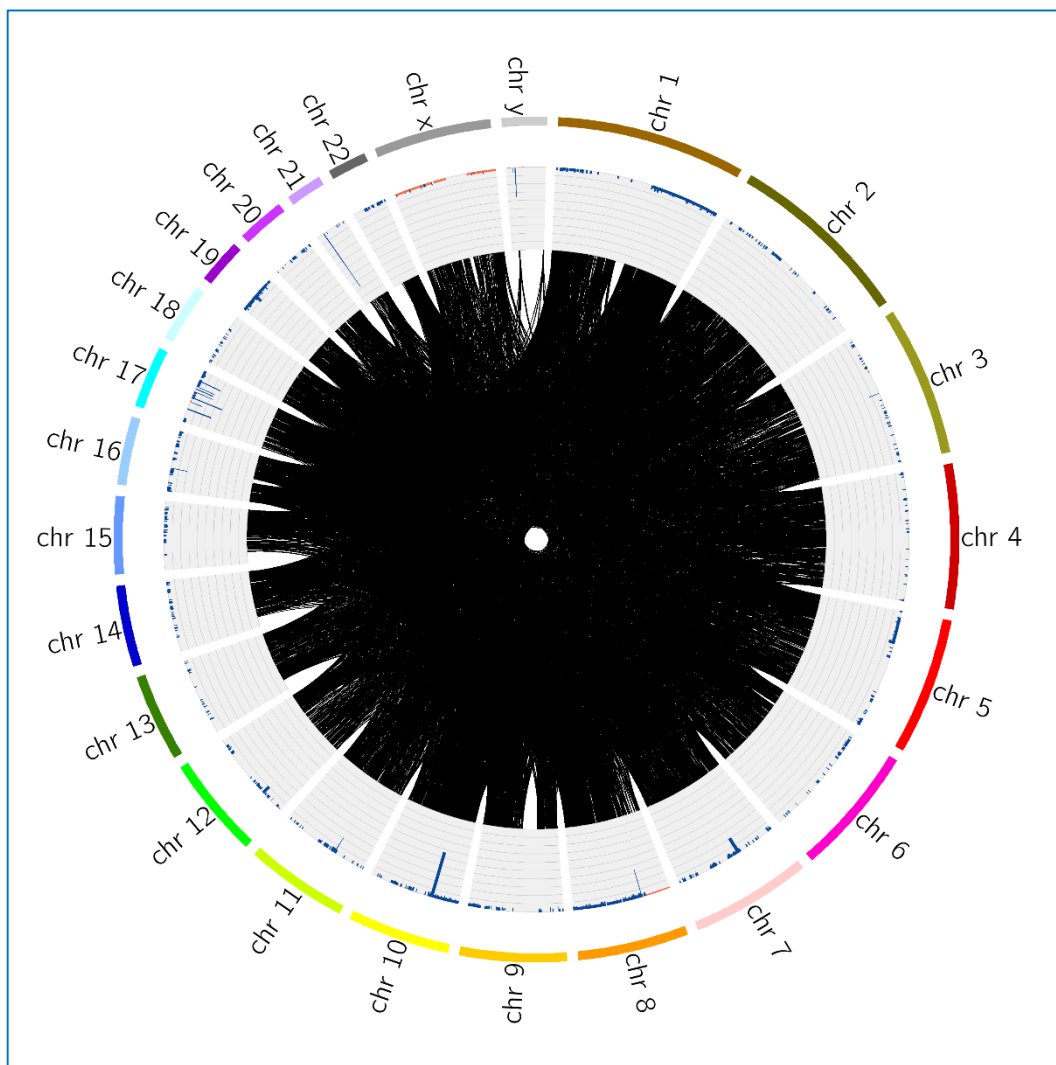

BreakDancer + Control-FREEC

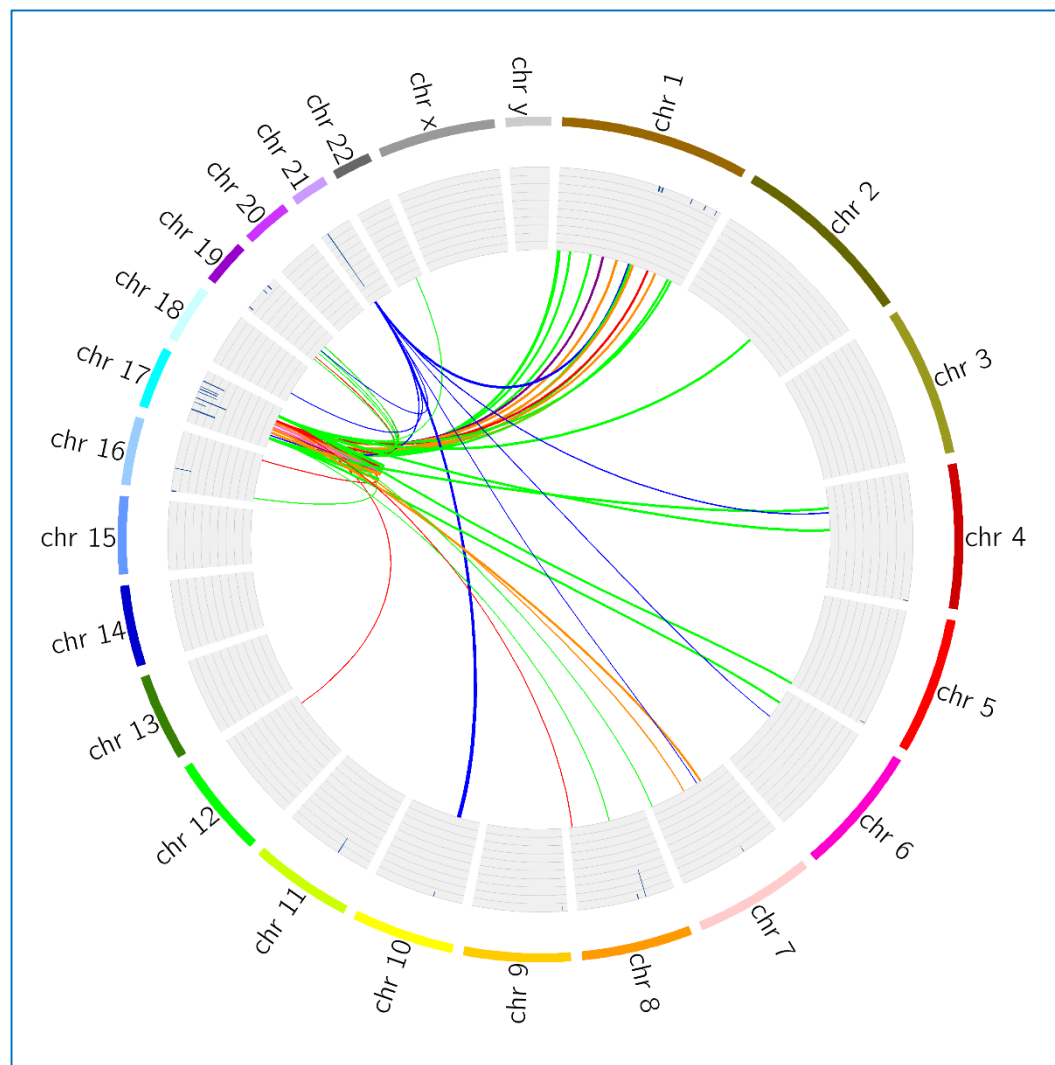

FAST - Whole Genome

p-114

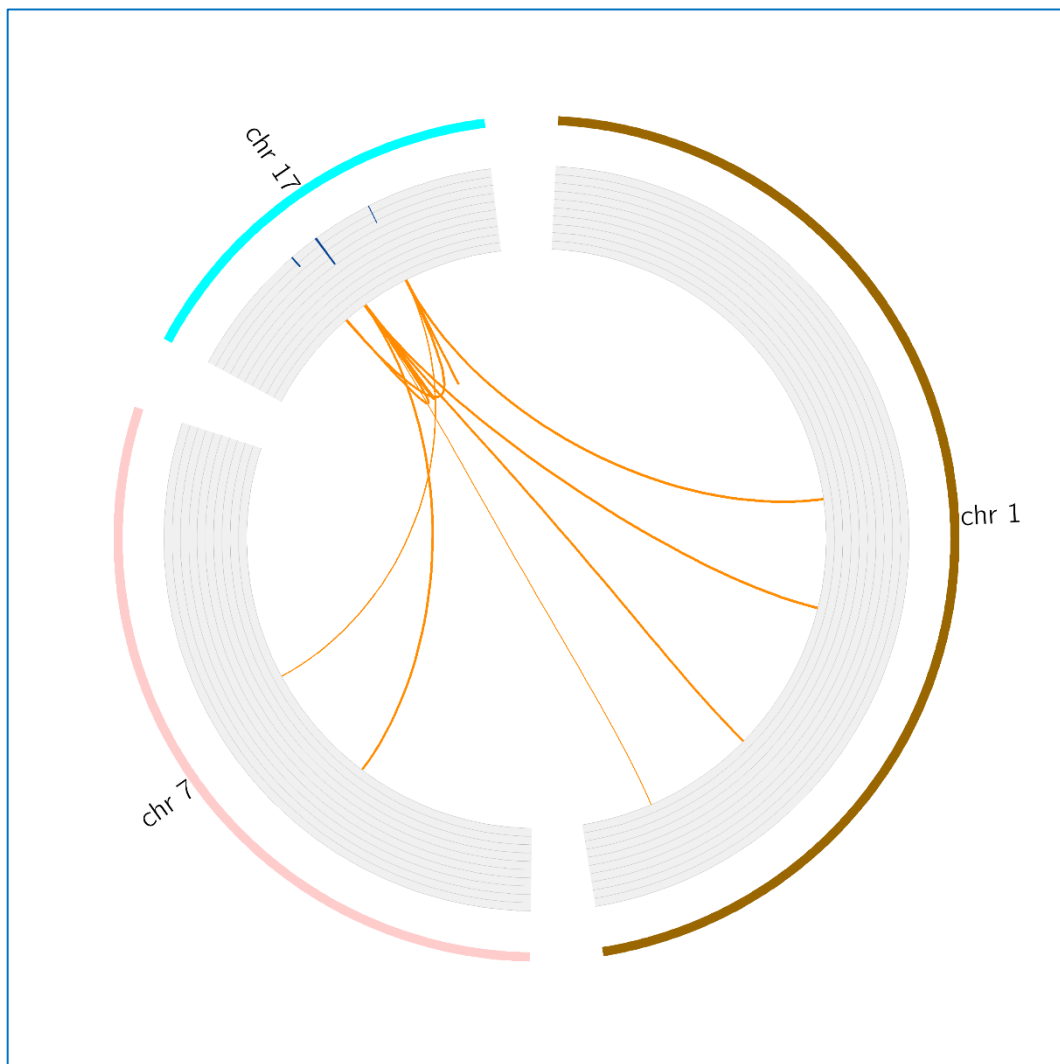

FAST – ERBB2 amplicon

p-115

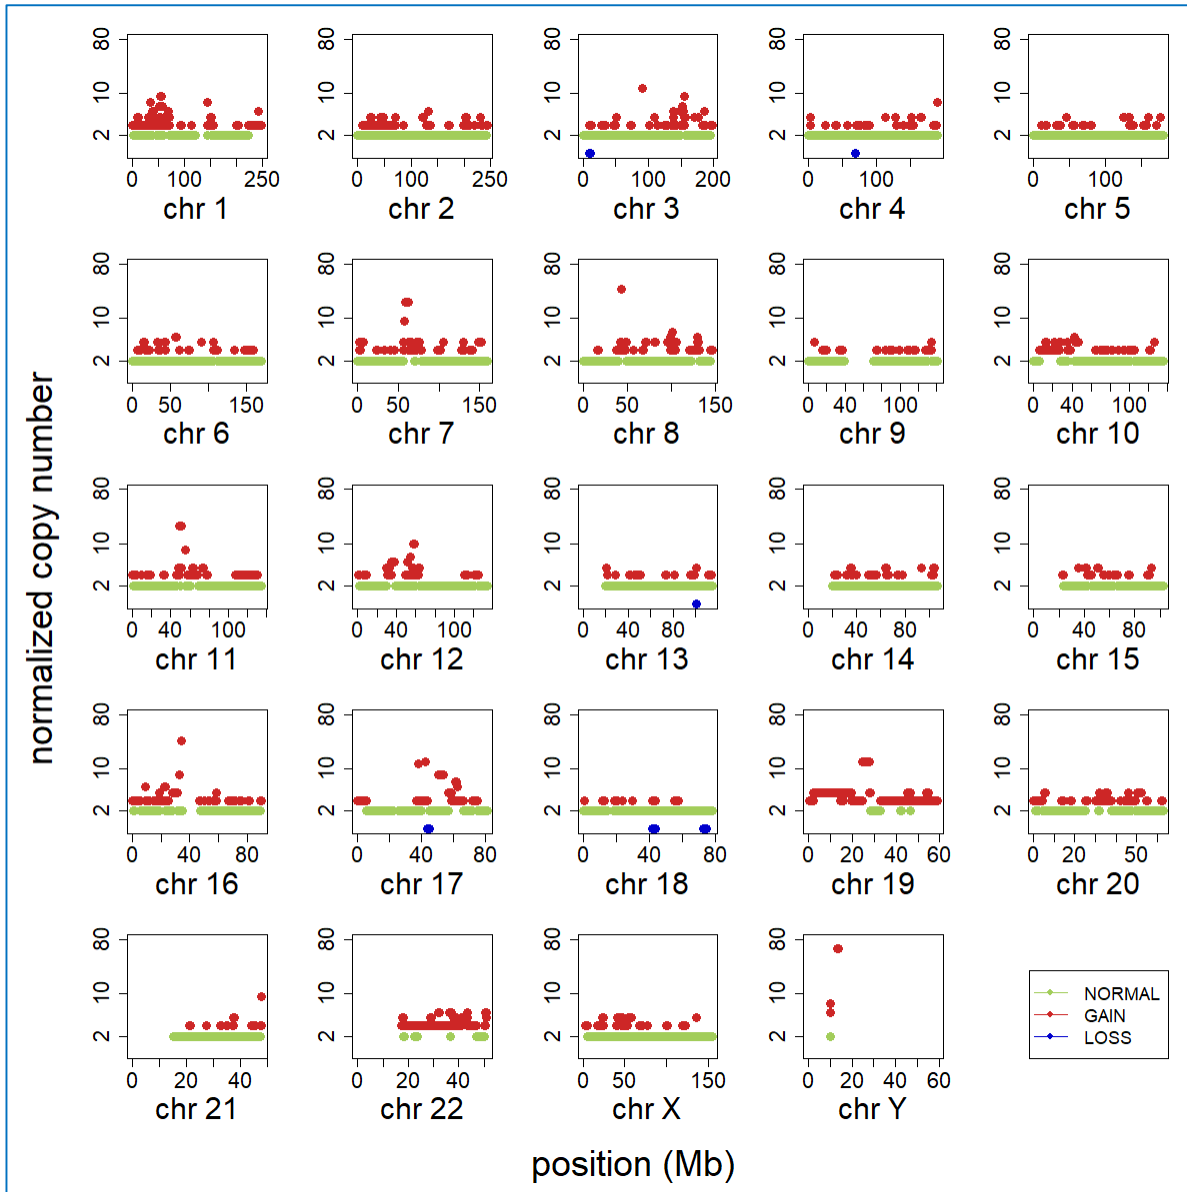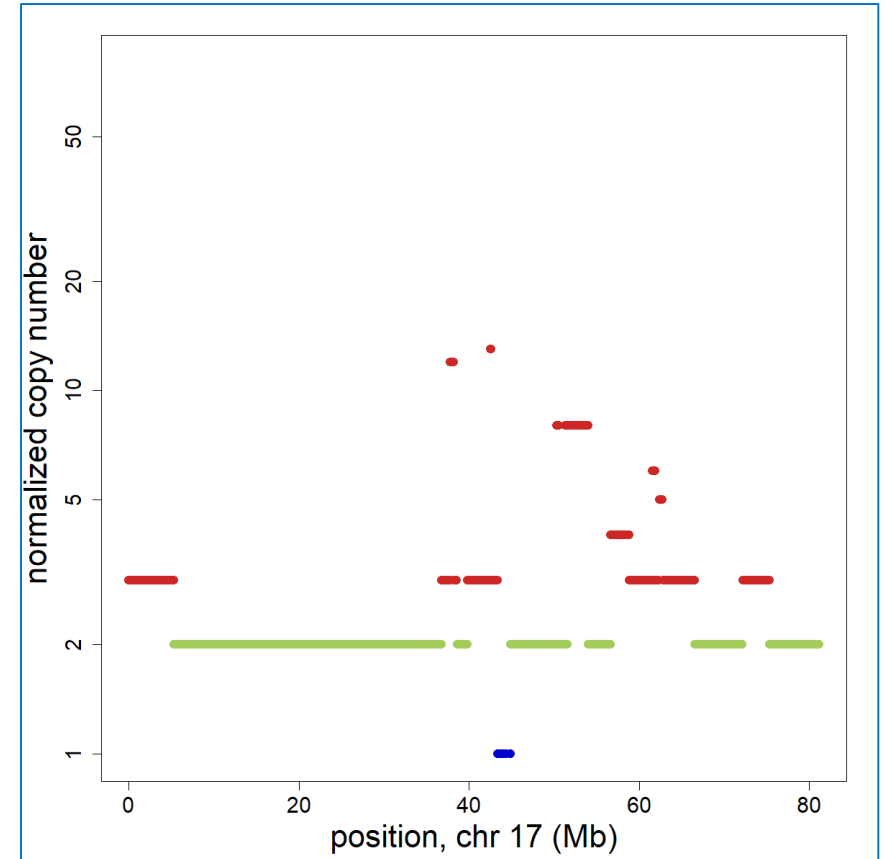

Control-FREEC

p-115

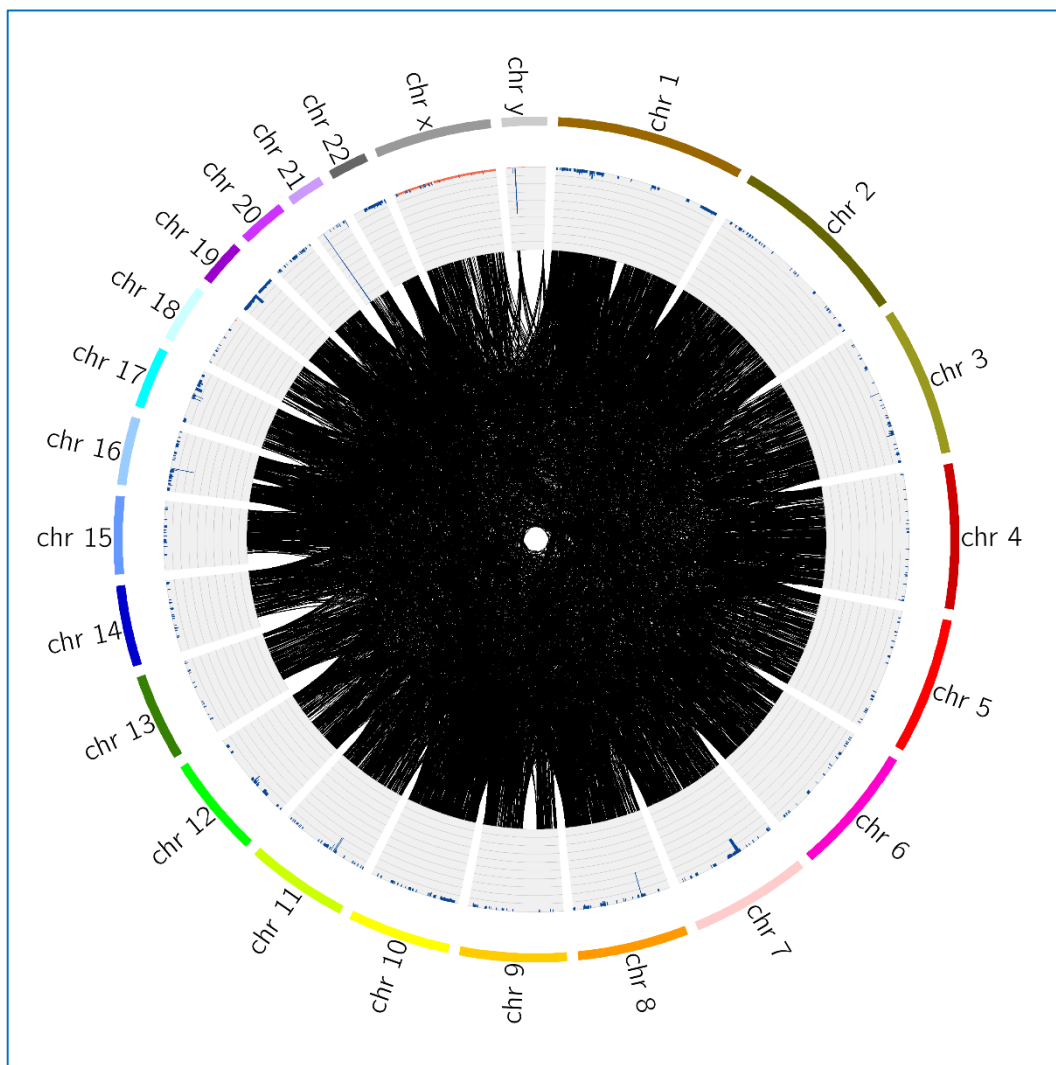

BreakDancer + Control-FREEC

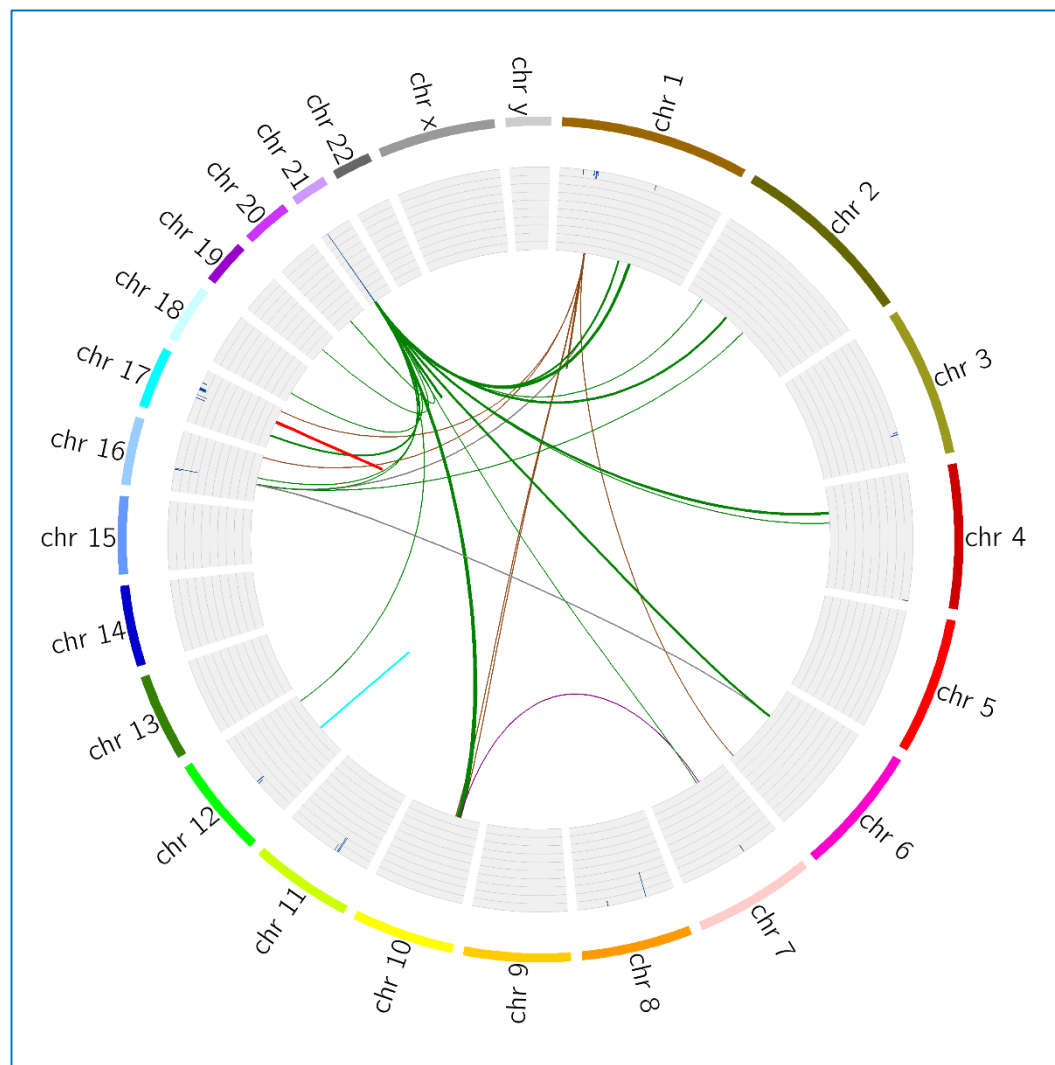

FAST - Whole Genome

p-115

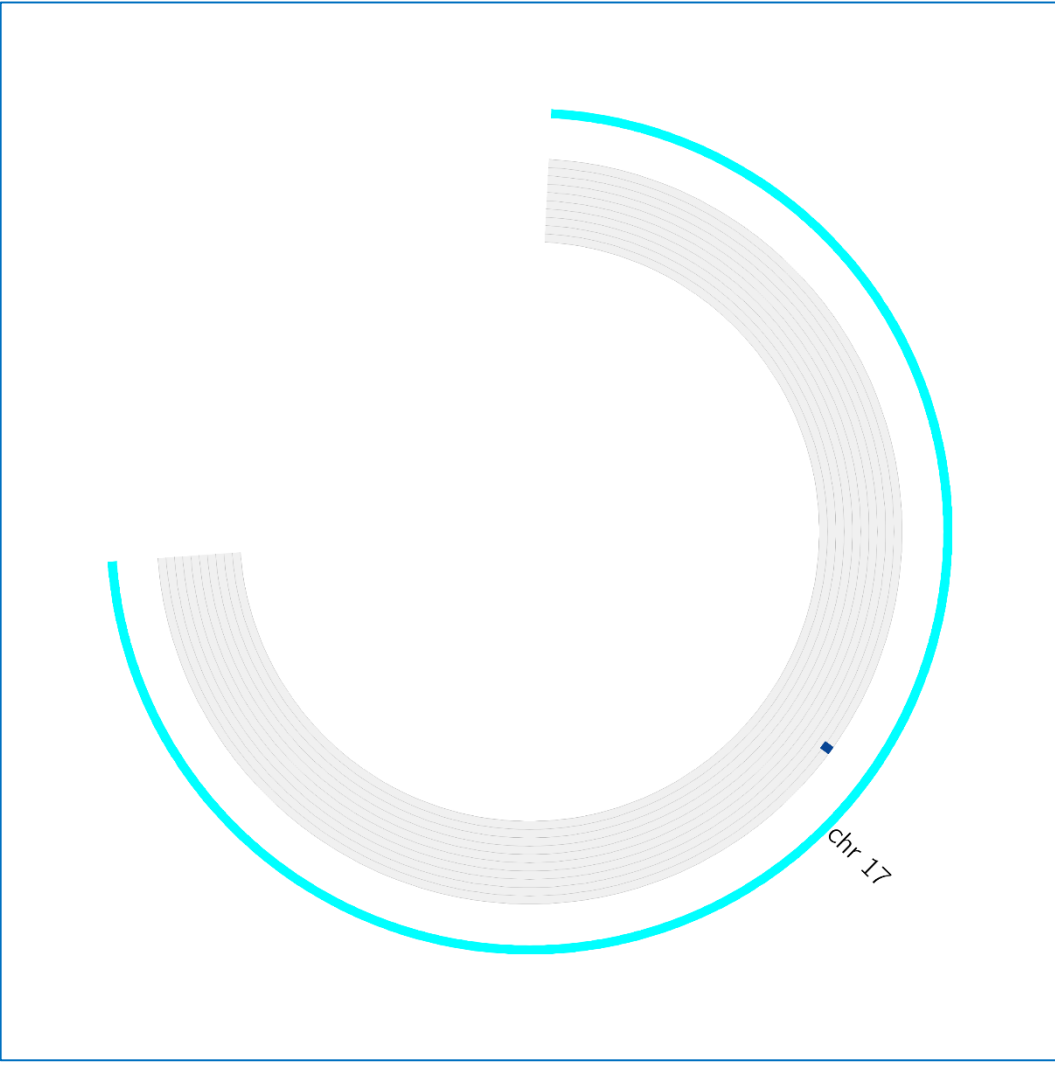

FAST – ERBB2 amplicon

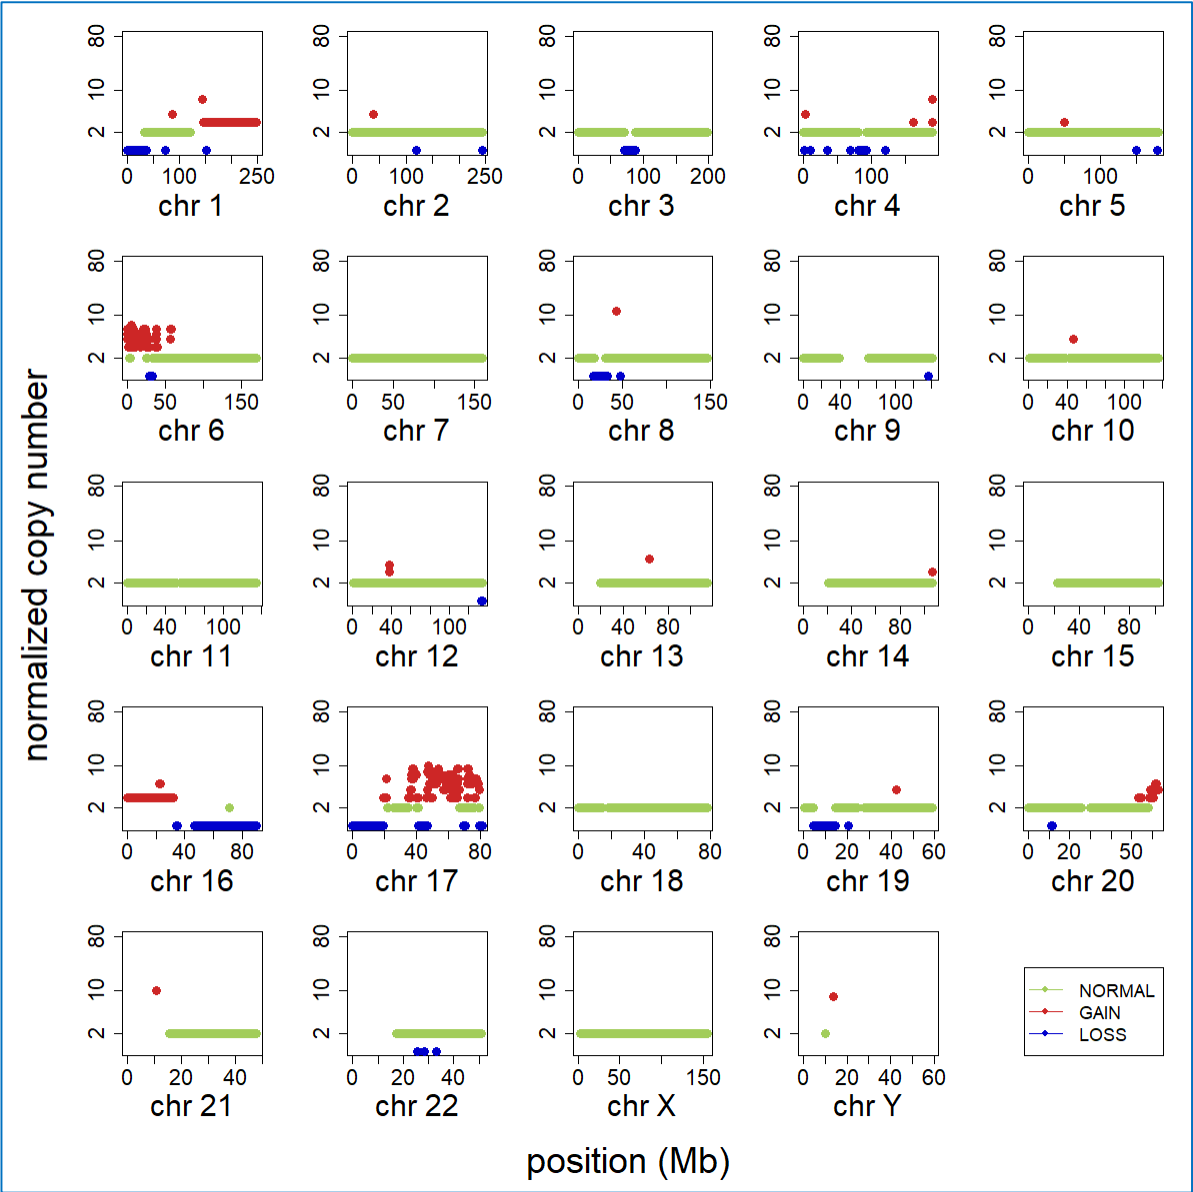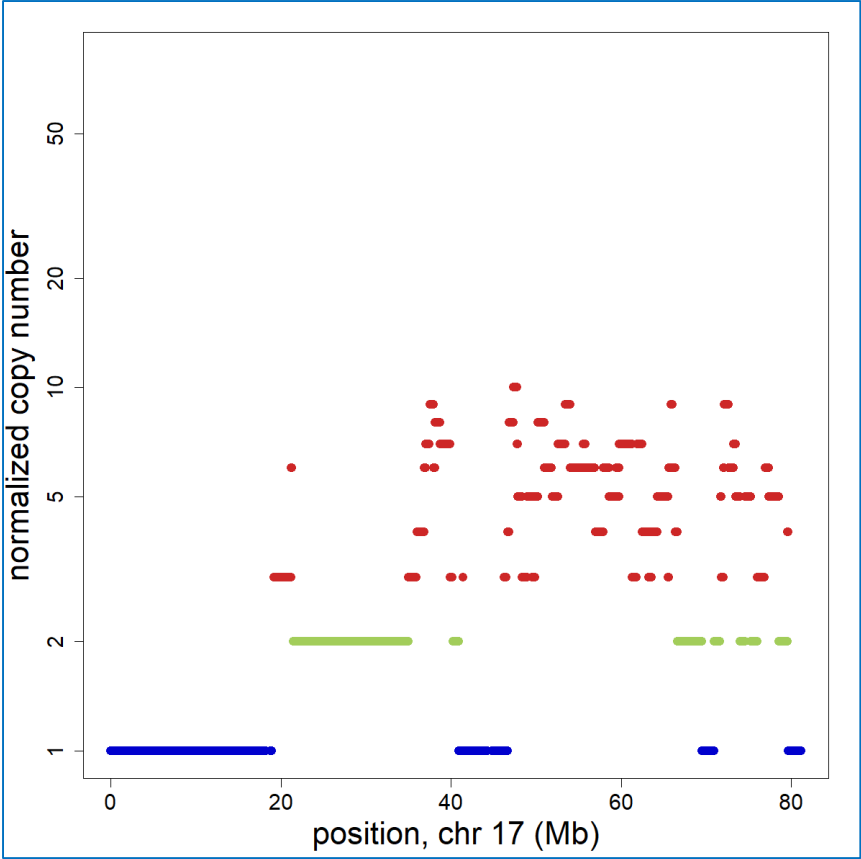

Control-FREEC

p-119

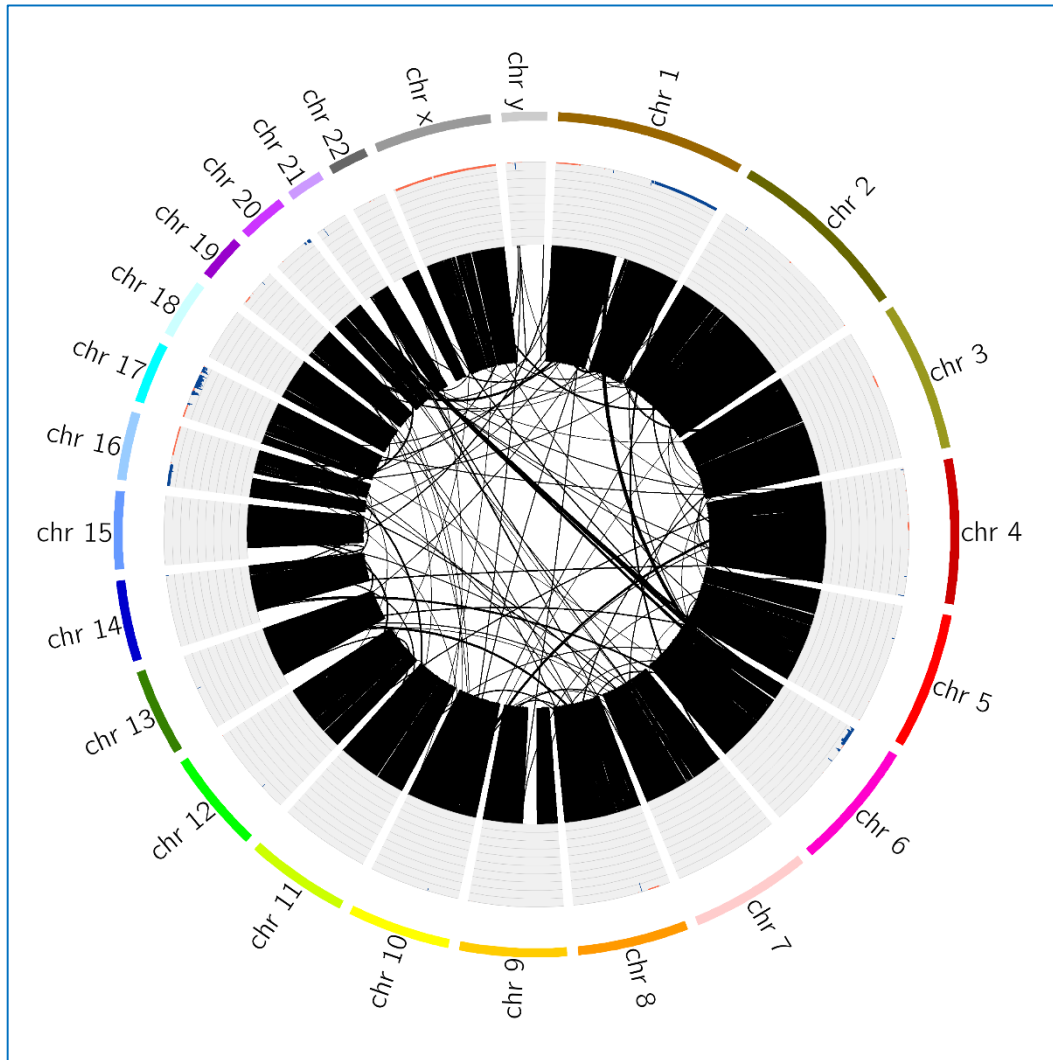

BreakDancer + Control-FREEC

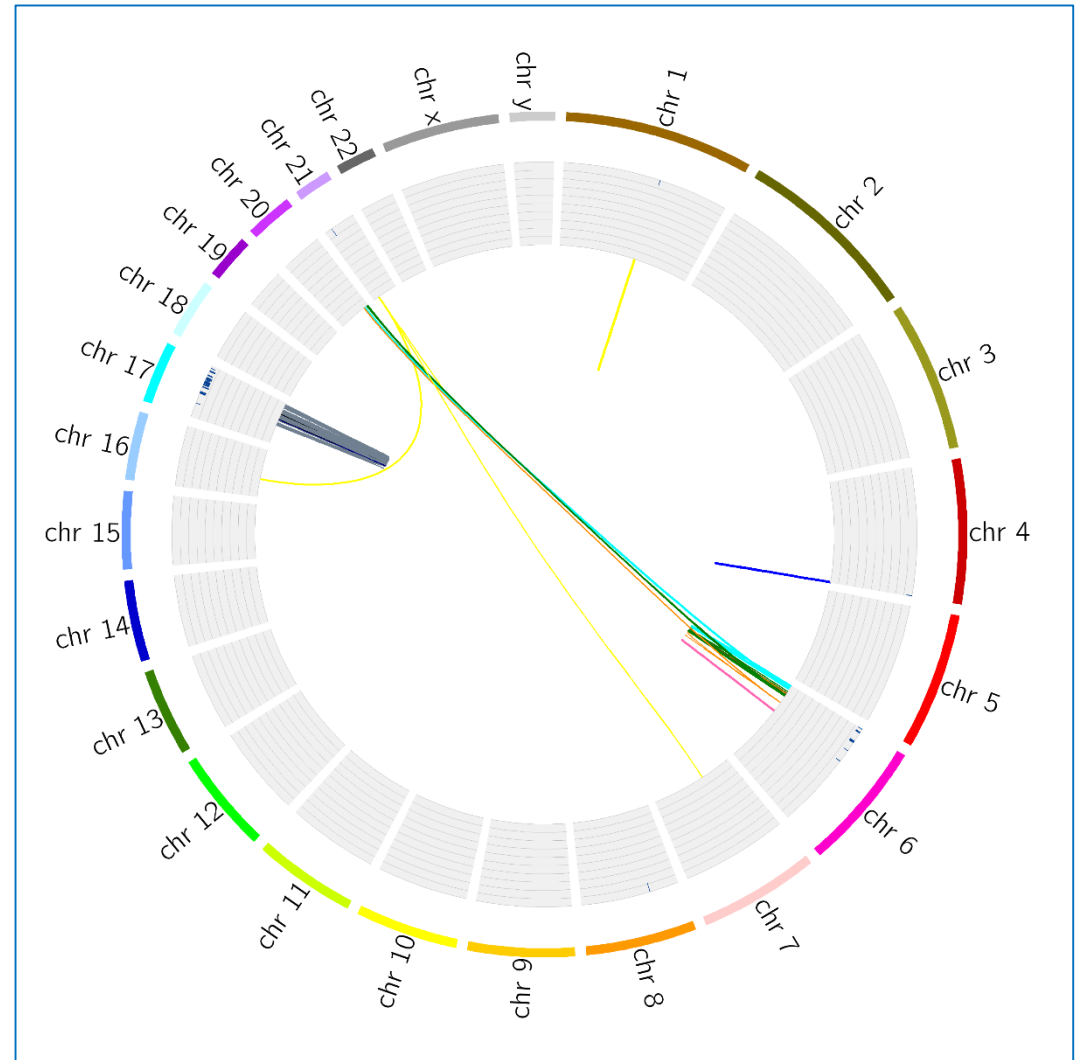

FAST – Whole Genome



p-119

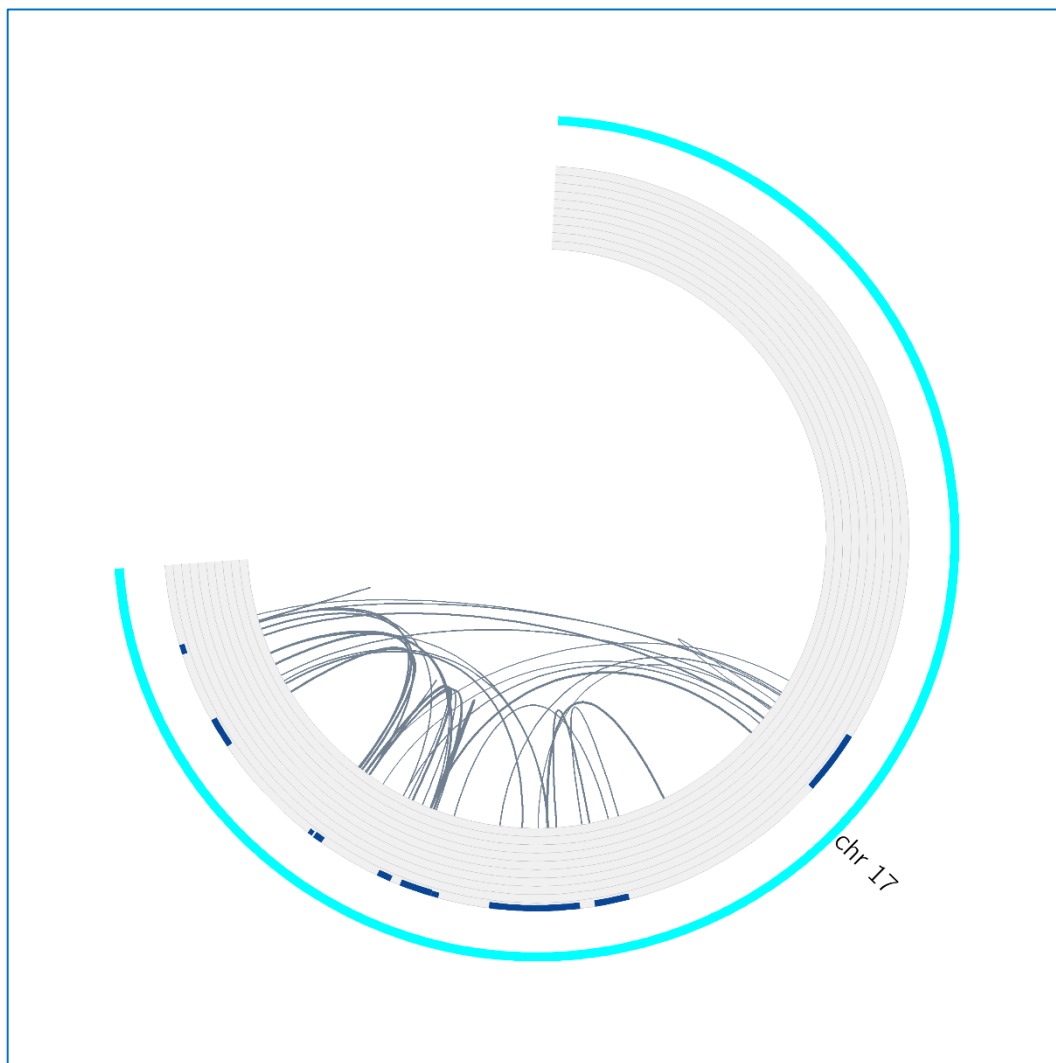

FAST – ERBB2 amplicon

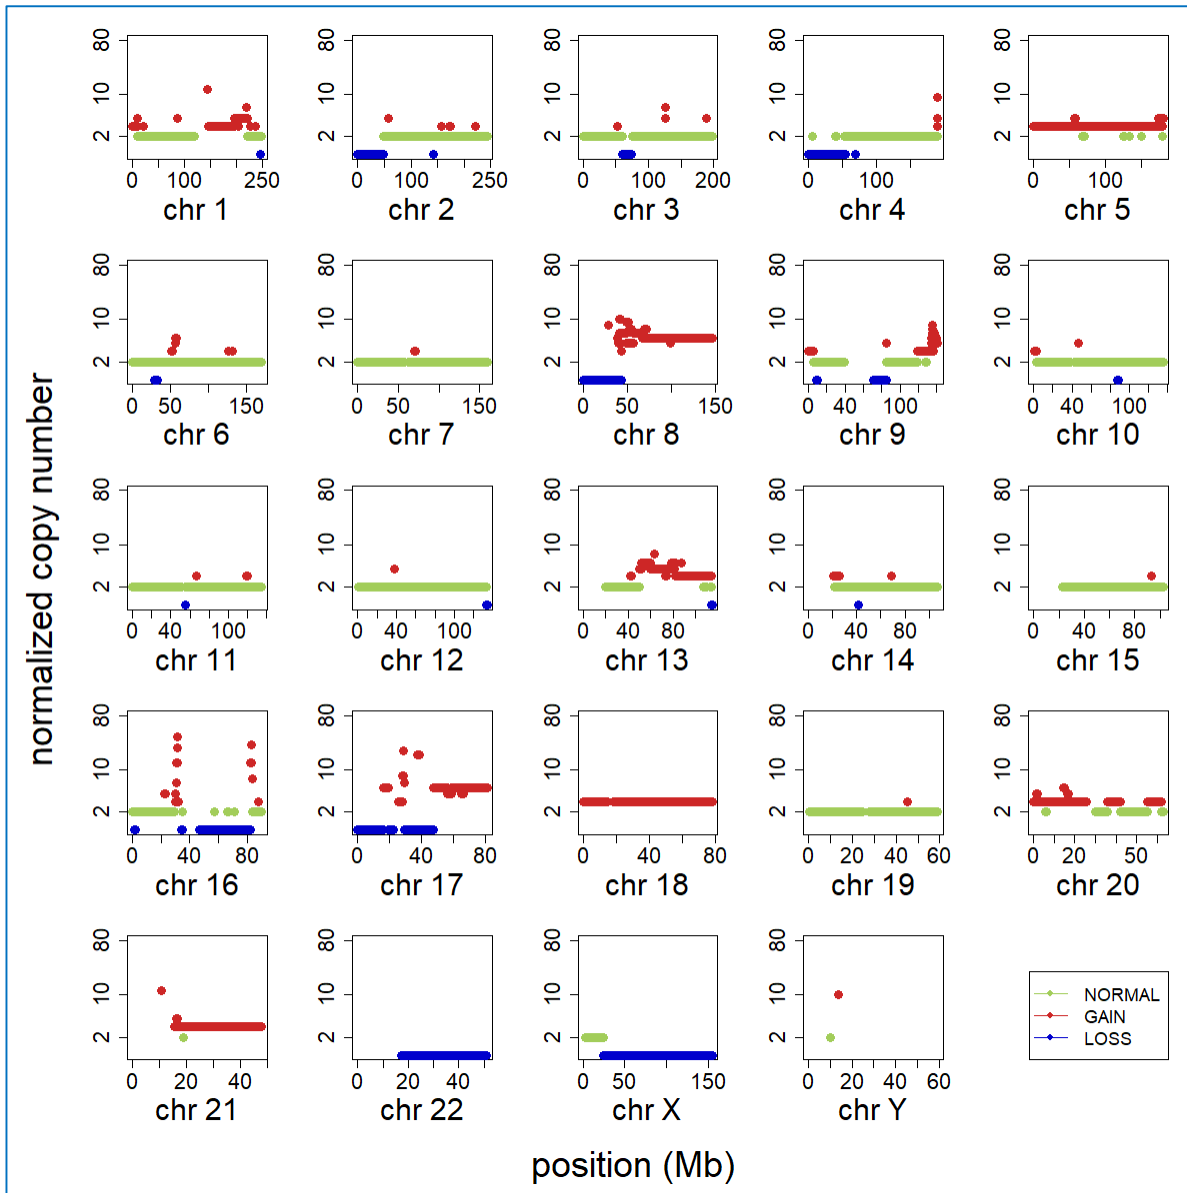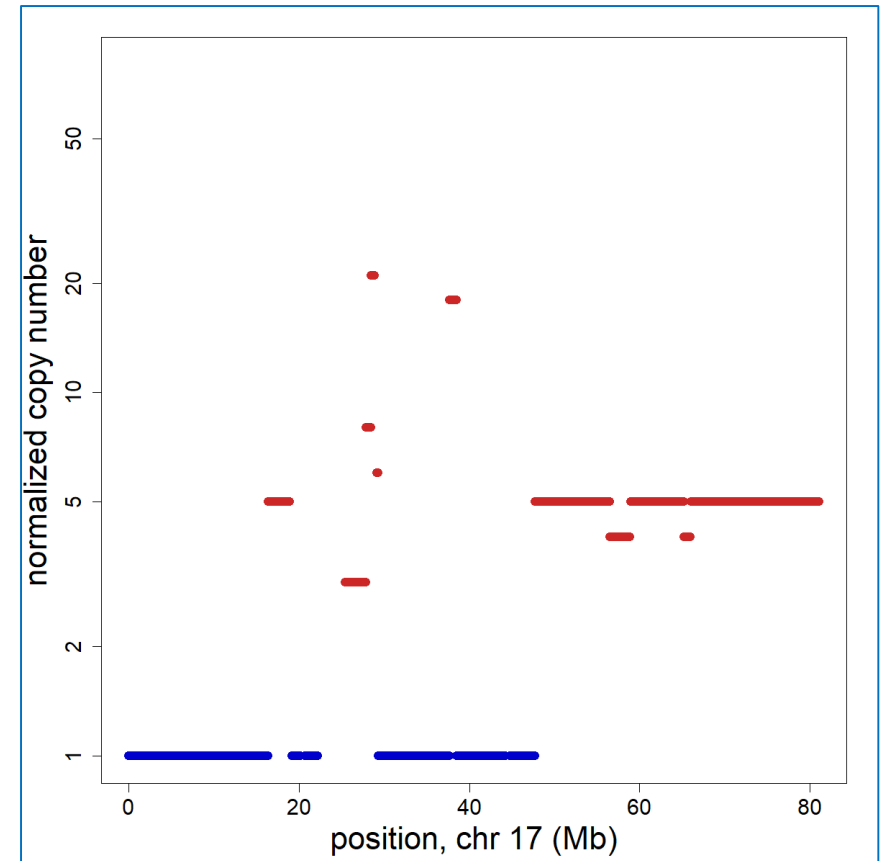

Control-FREEC

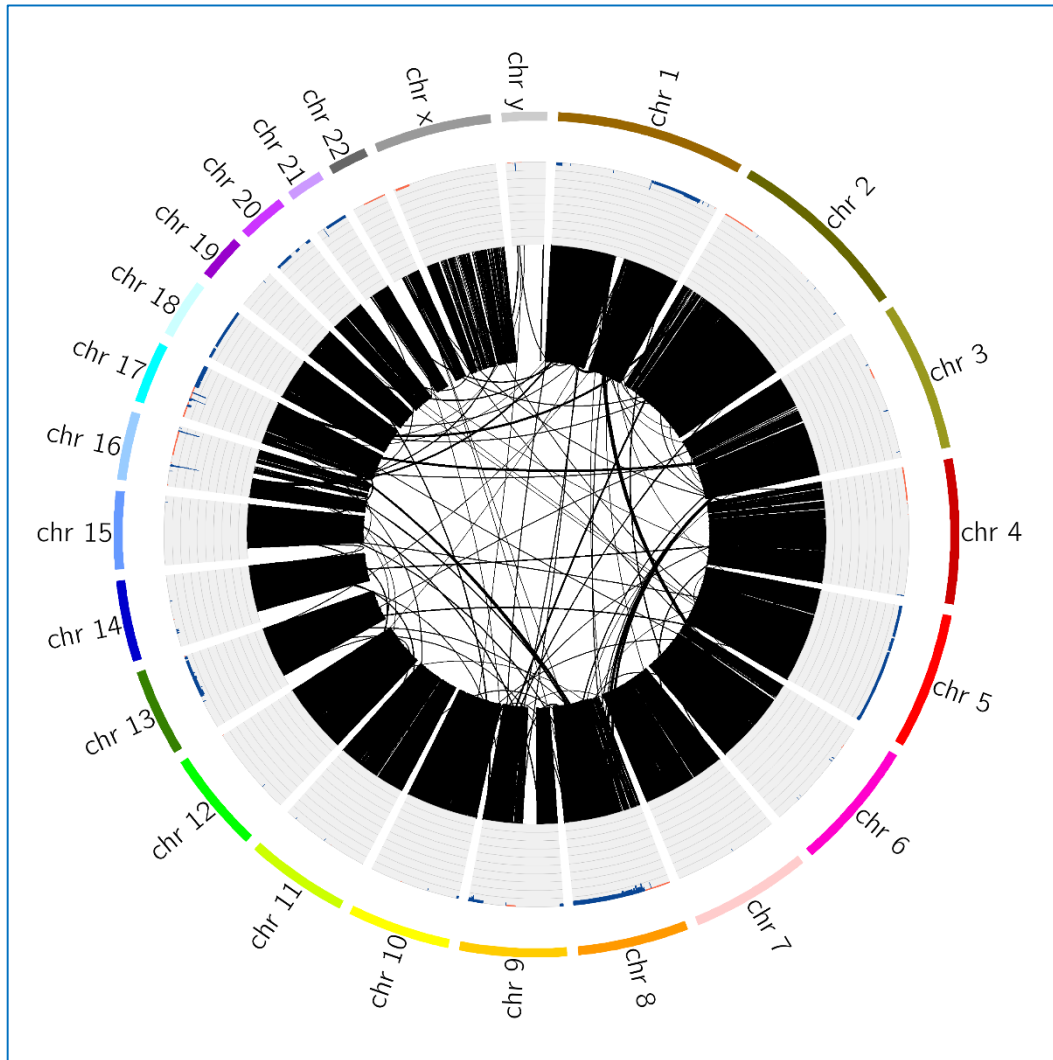

BreakDancer + Control-FREEC

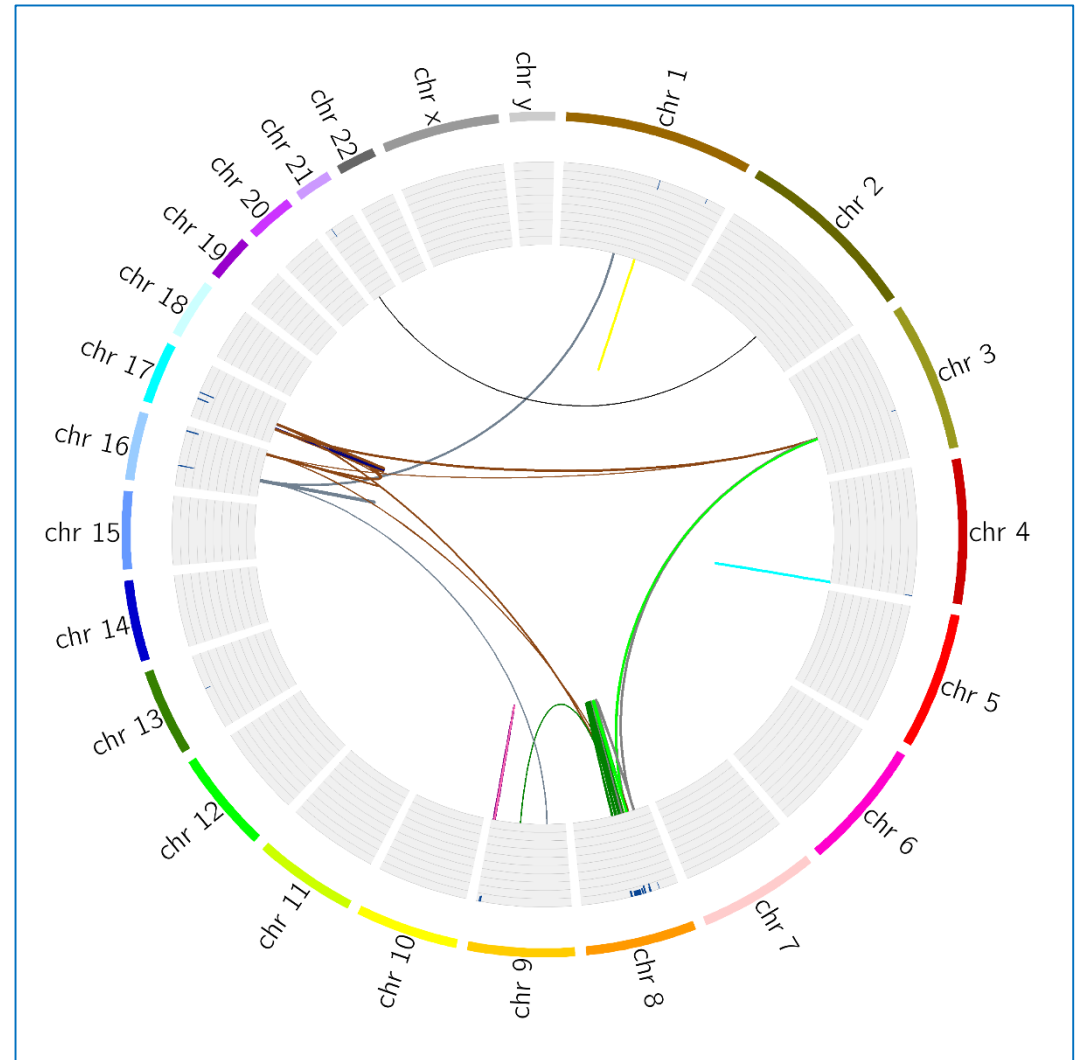

FAST - Whole Genome

166

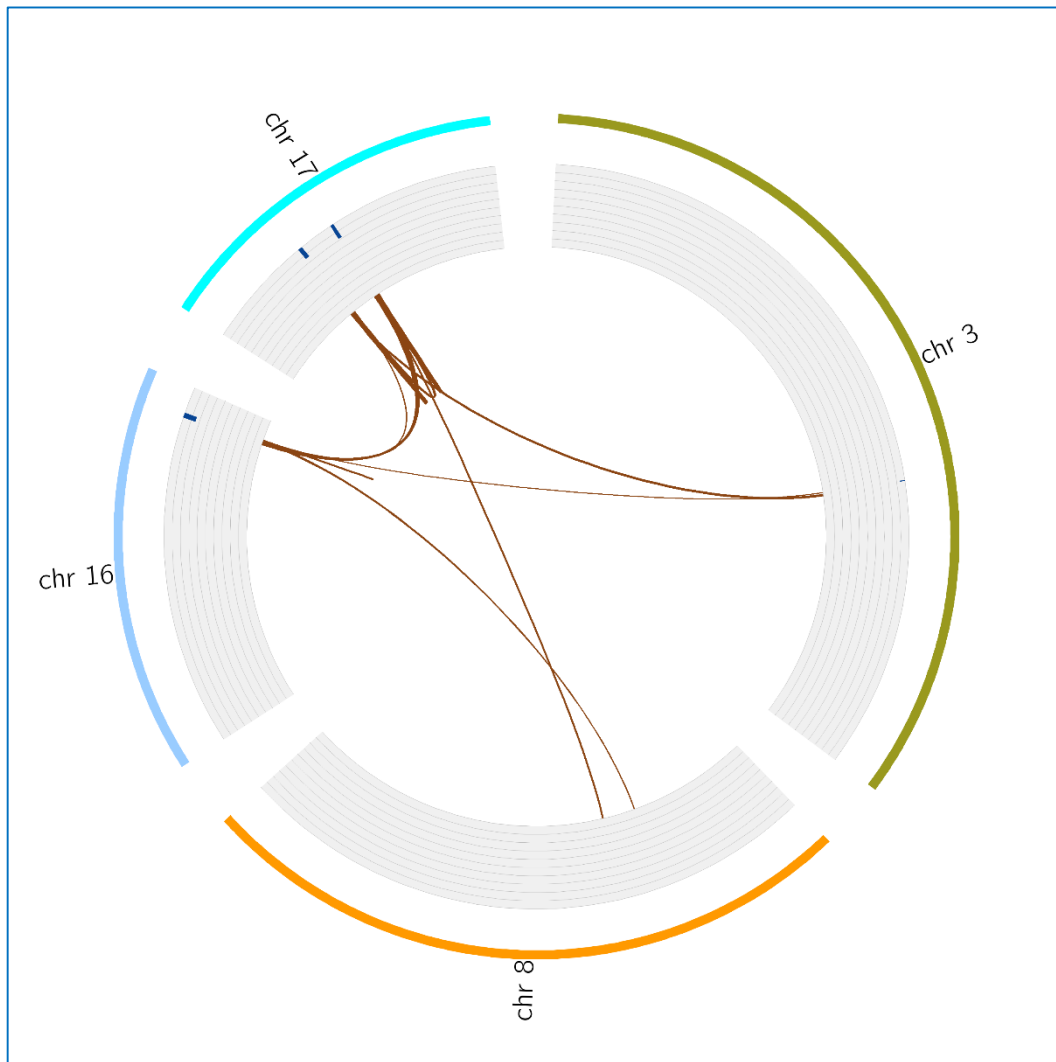

FAST – ERBB2 amplicon

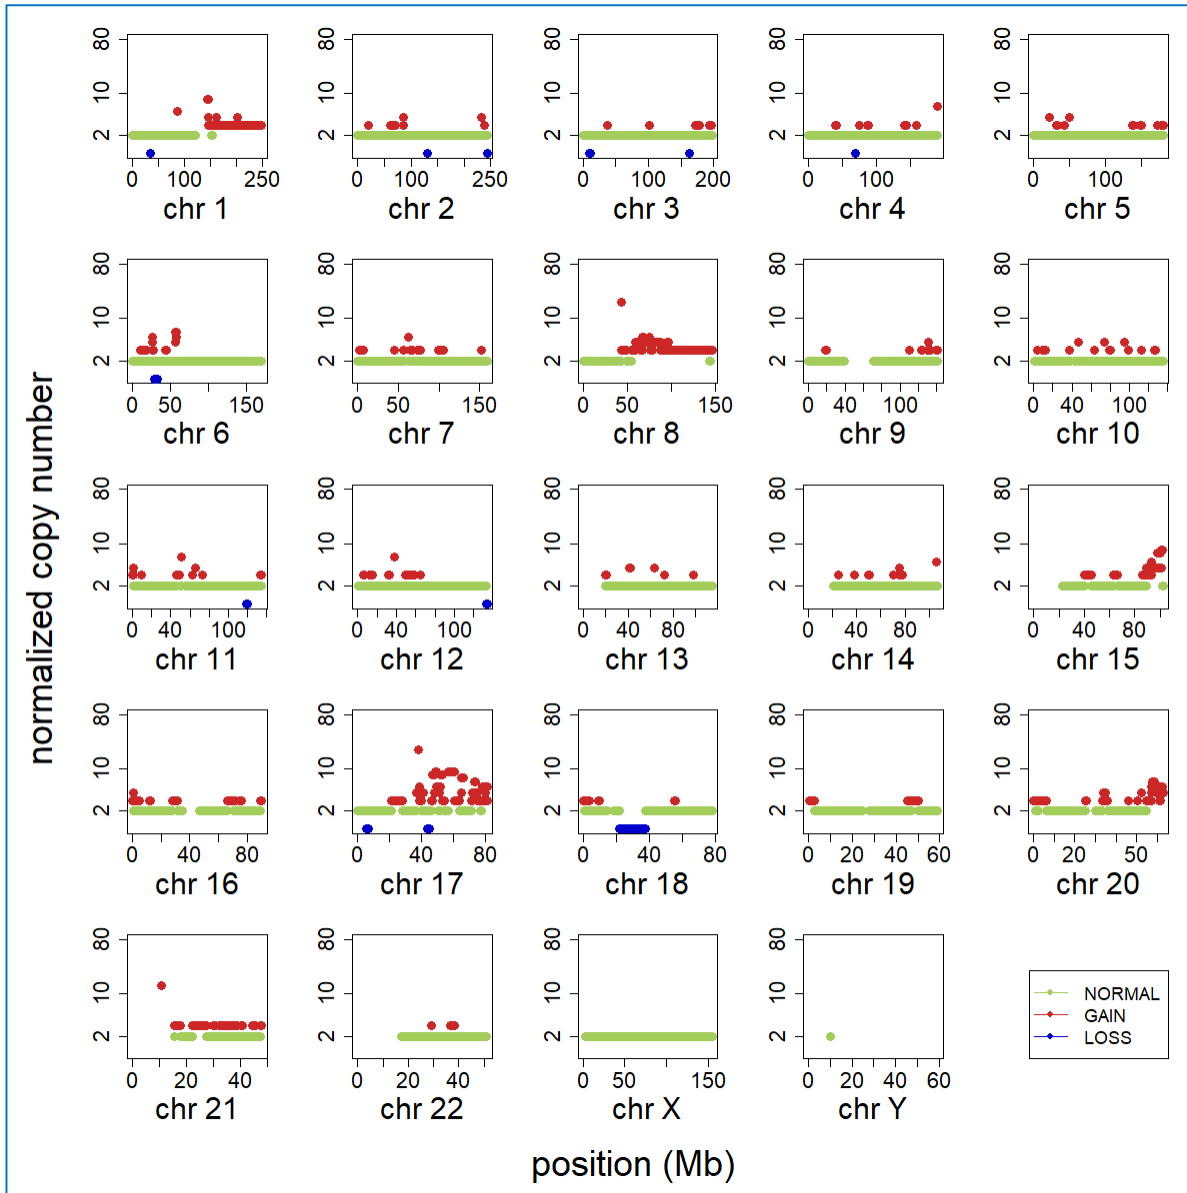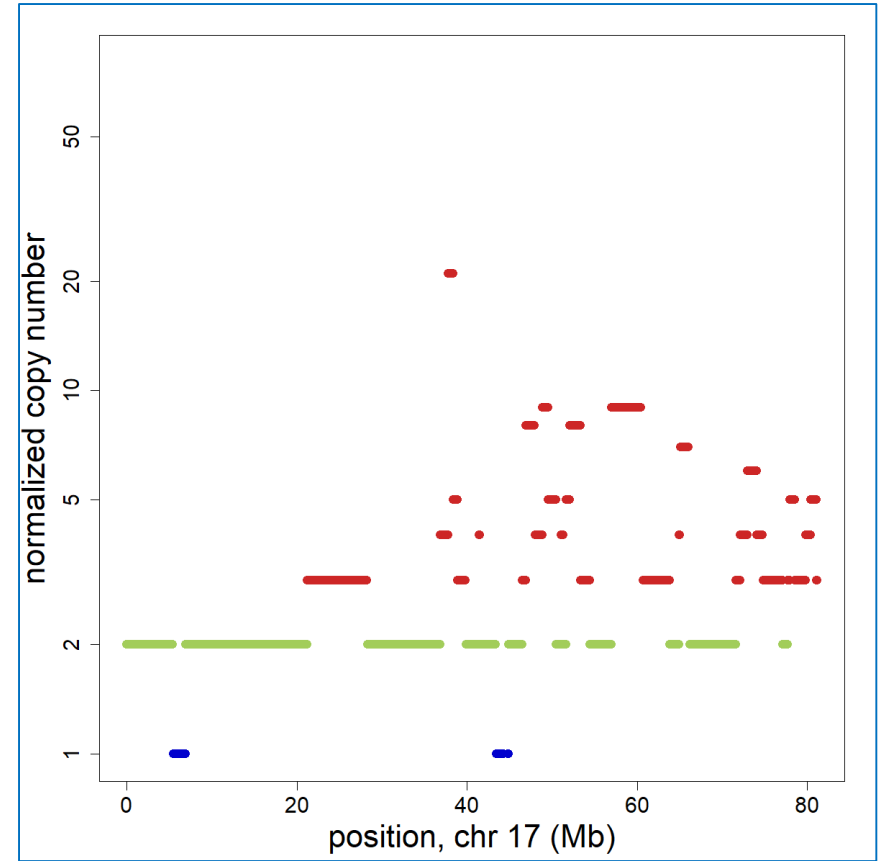

p-203

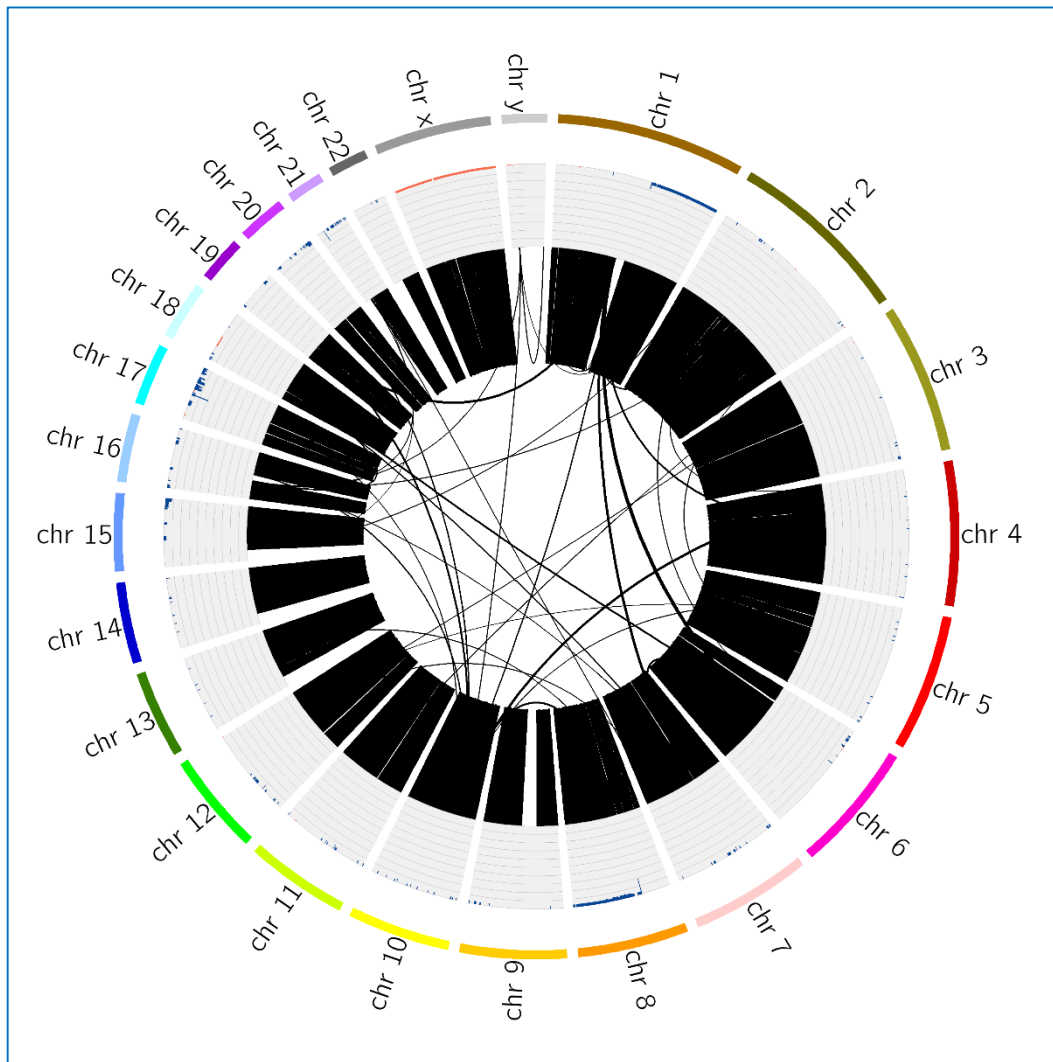

BreakDancer + Control-FREEC

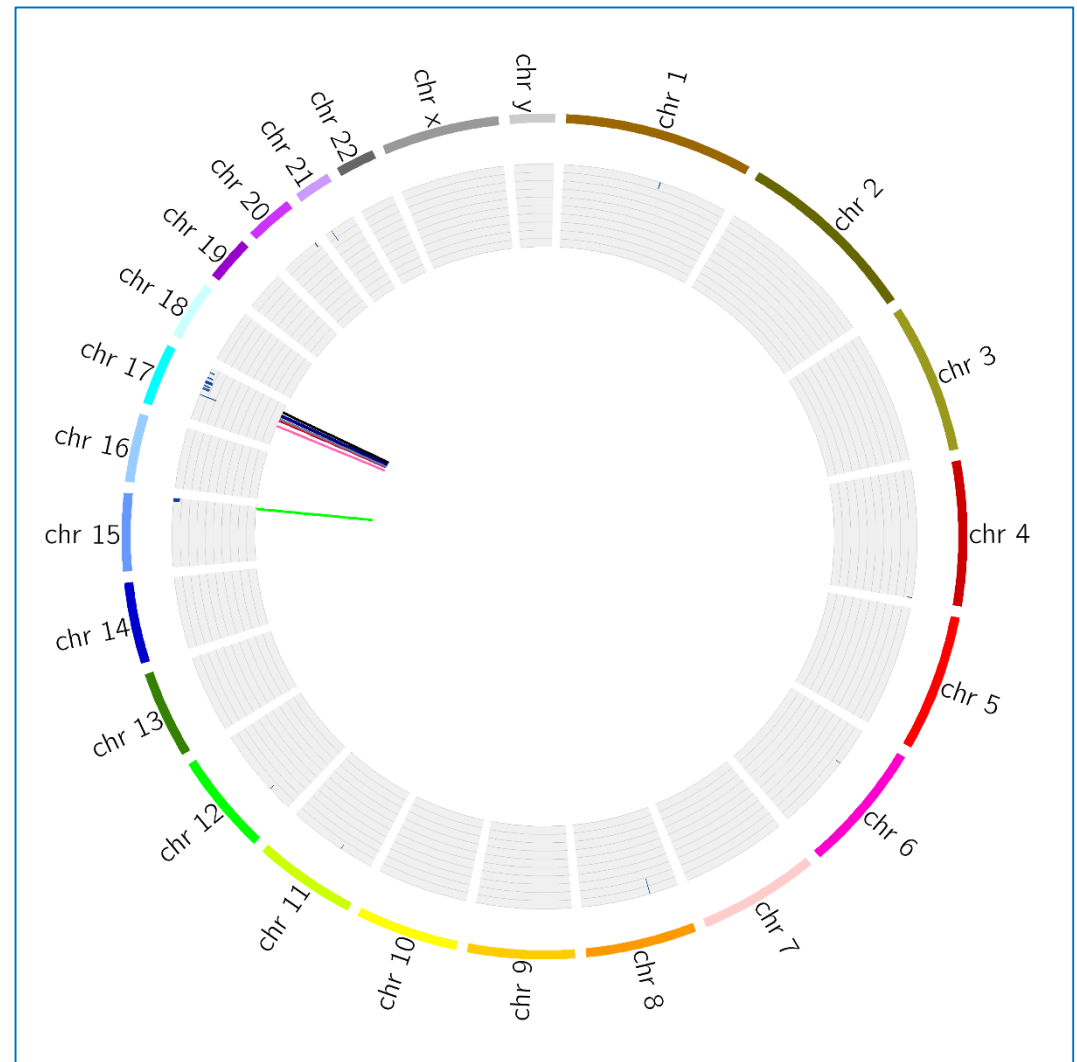

FAST - Whole Genome

p-203

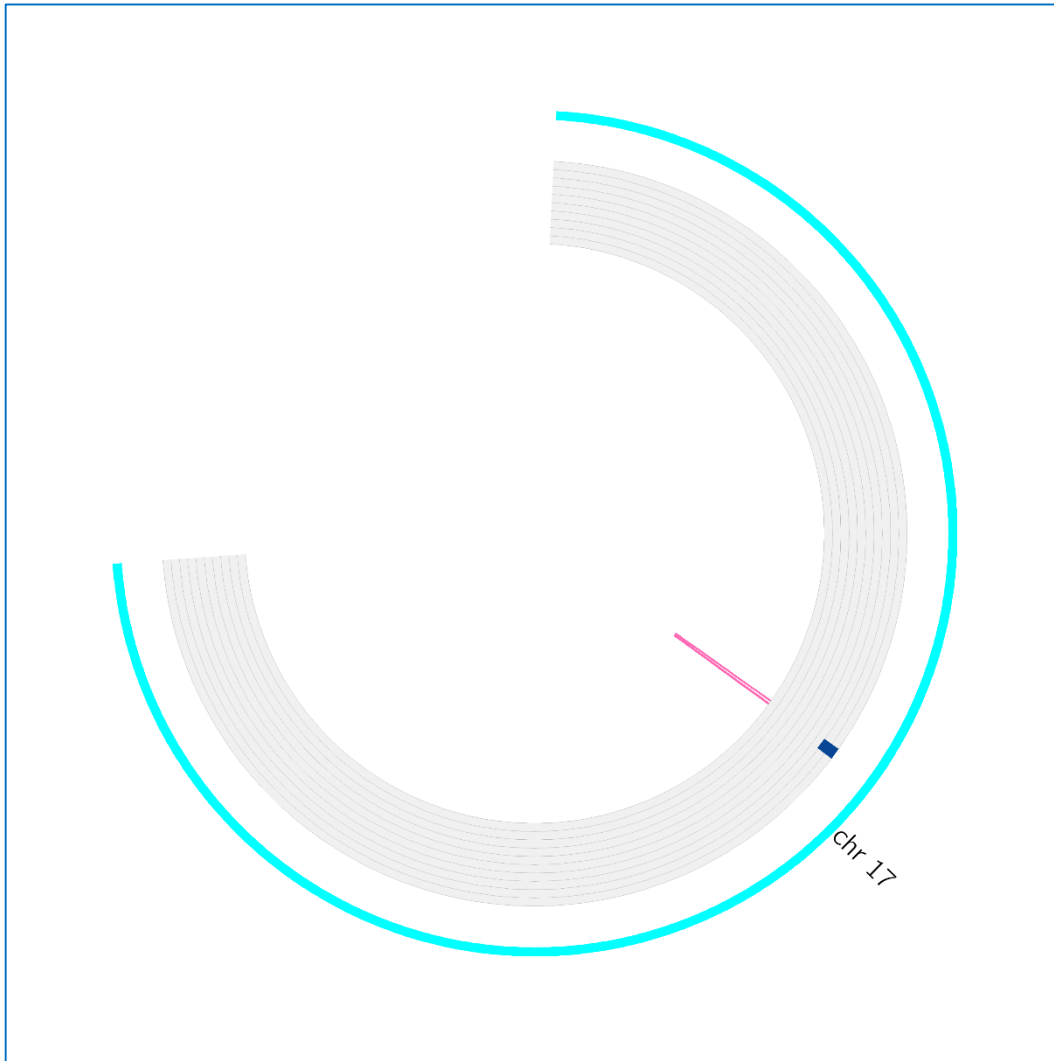

FAST – ERBB2 amplicon

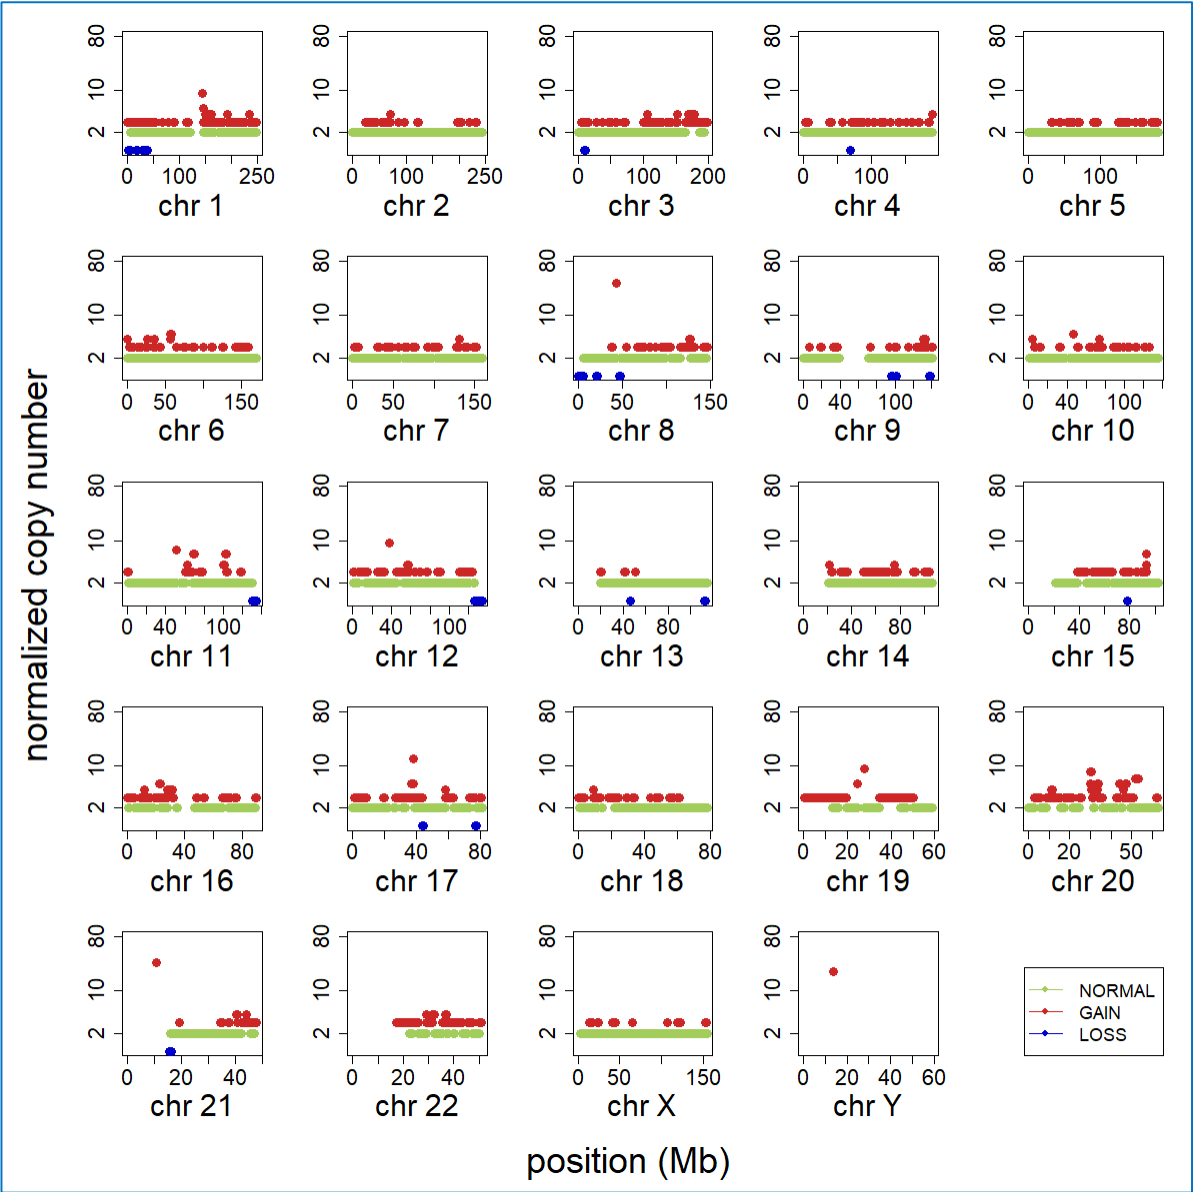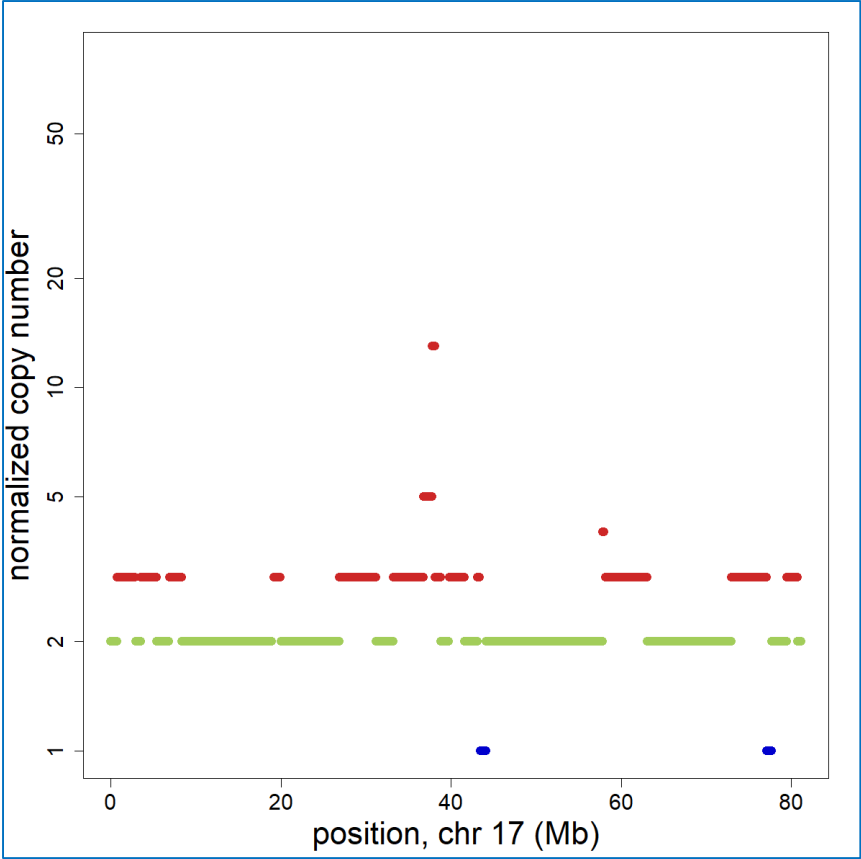

Control-FREEC



p-204

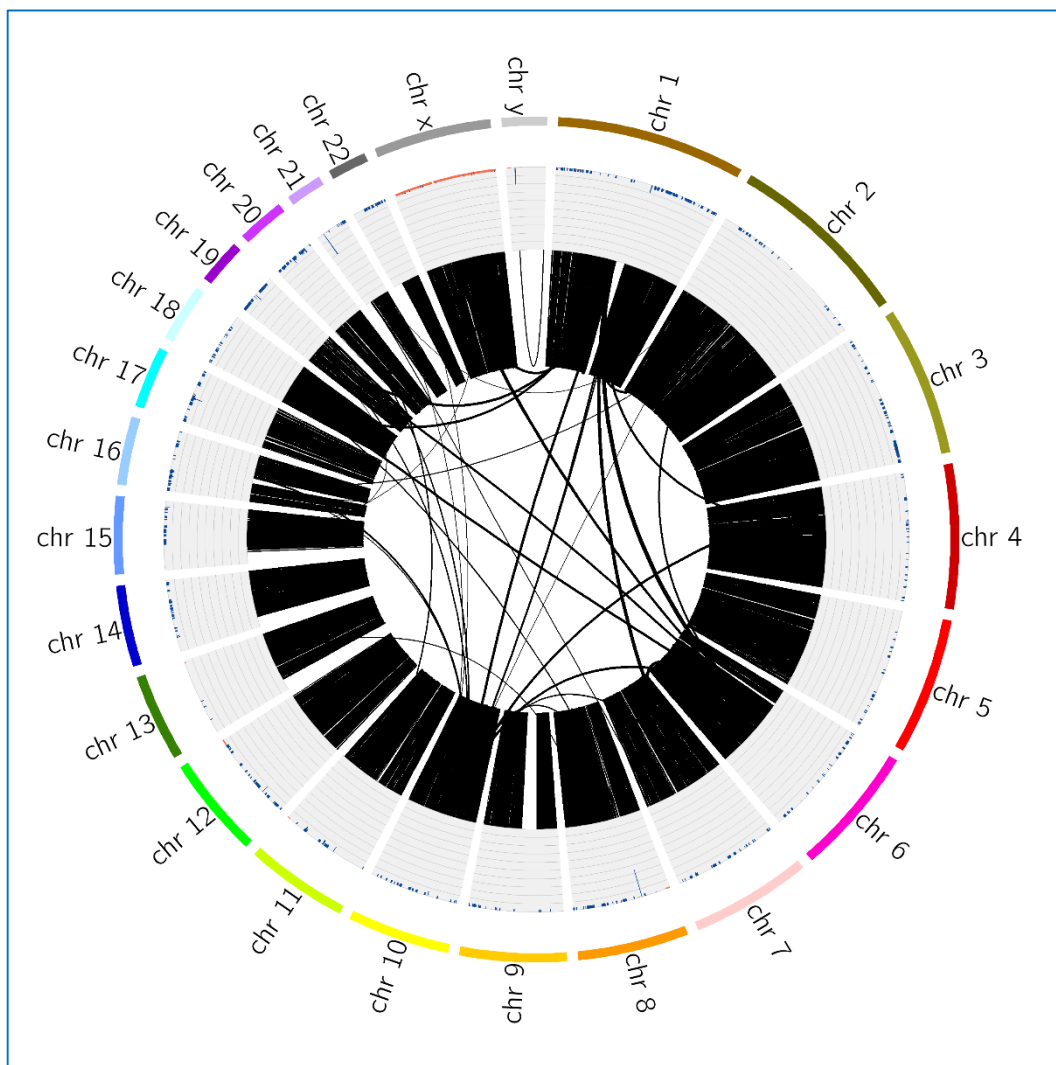

BreakDancer + Control-FREEC

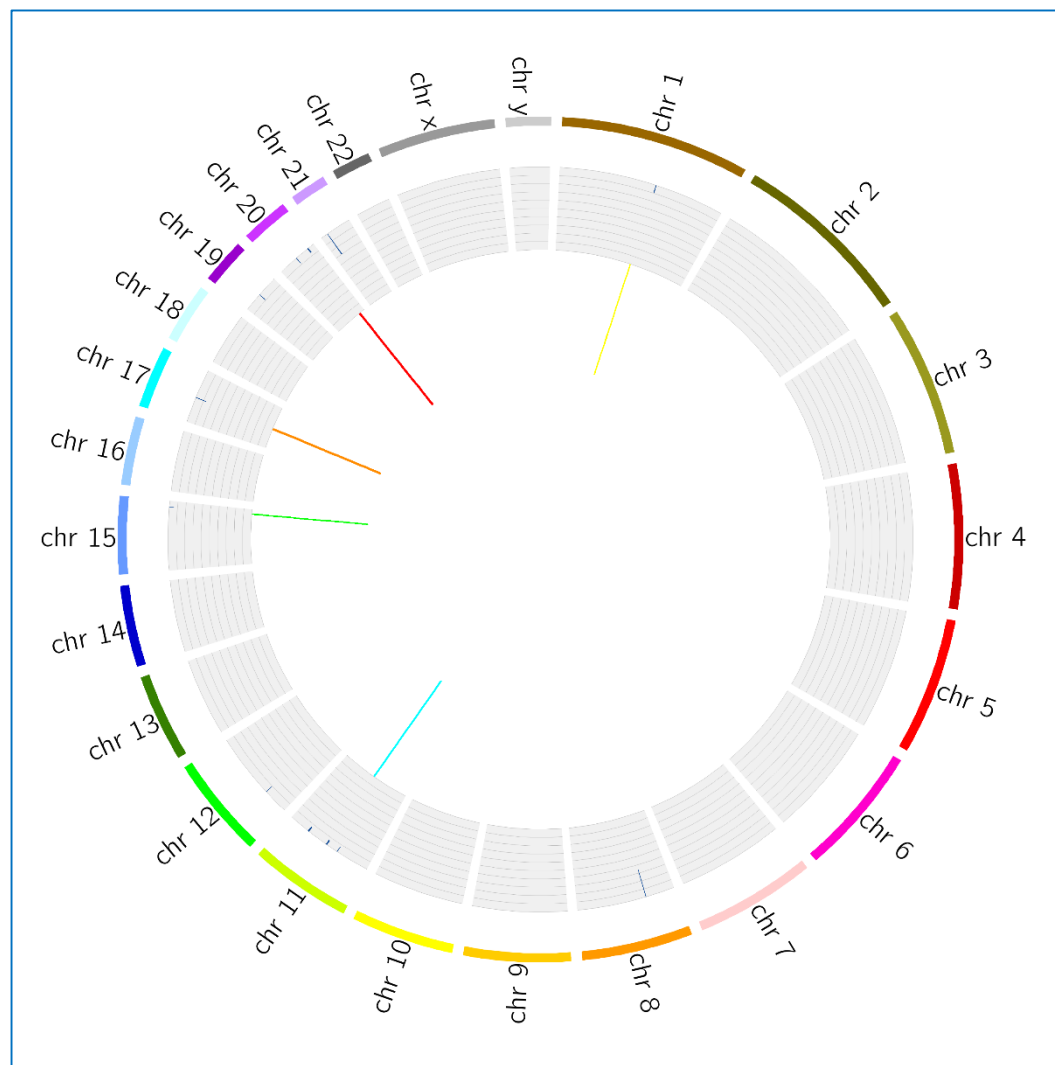

FAST - Whole Genome

p-204

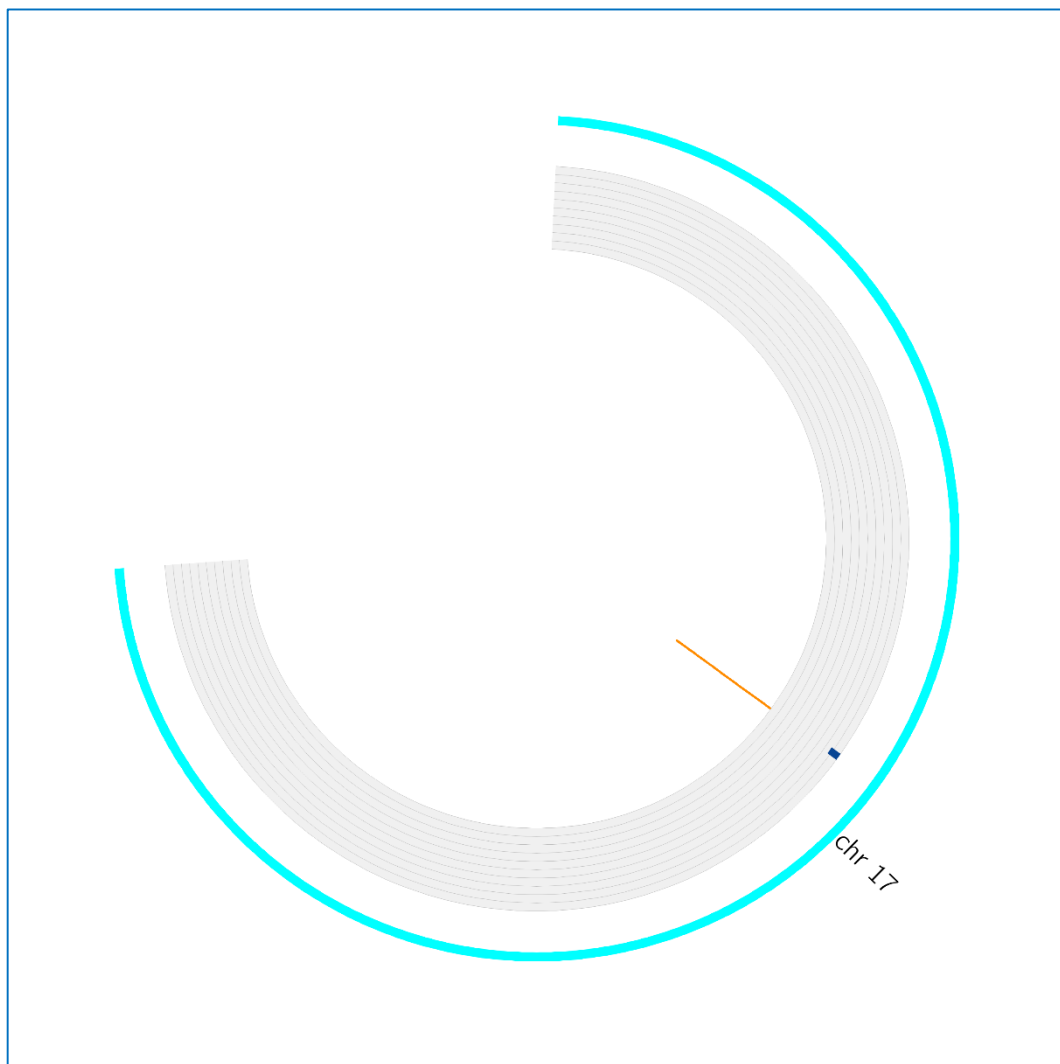

FAST – ERBB2 amplicon

p-205

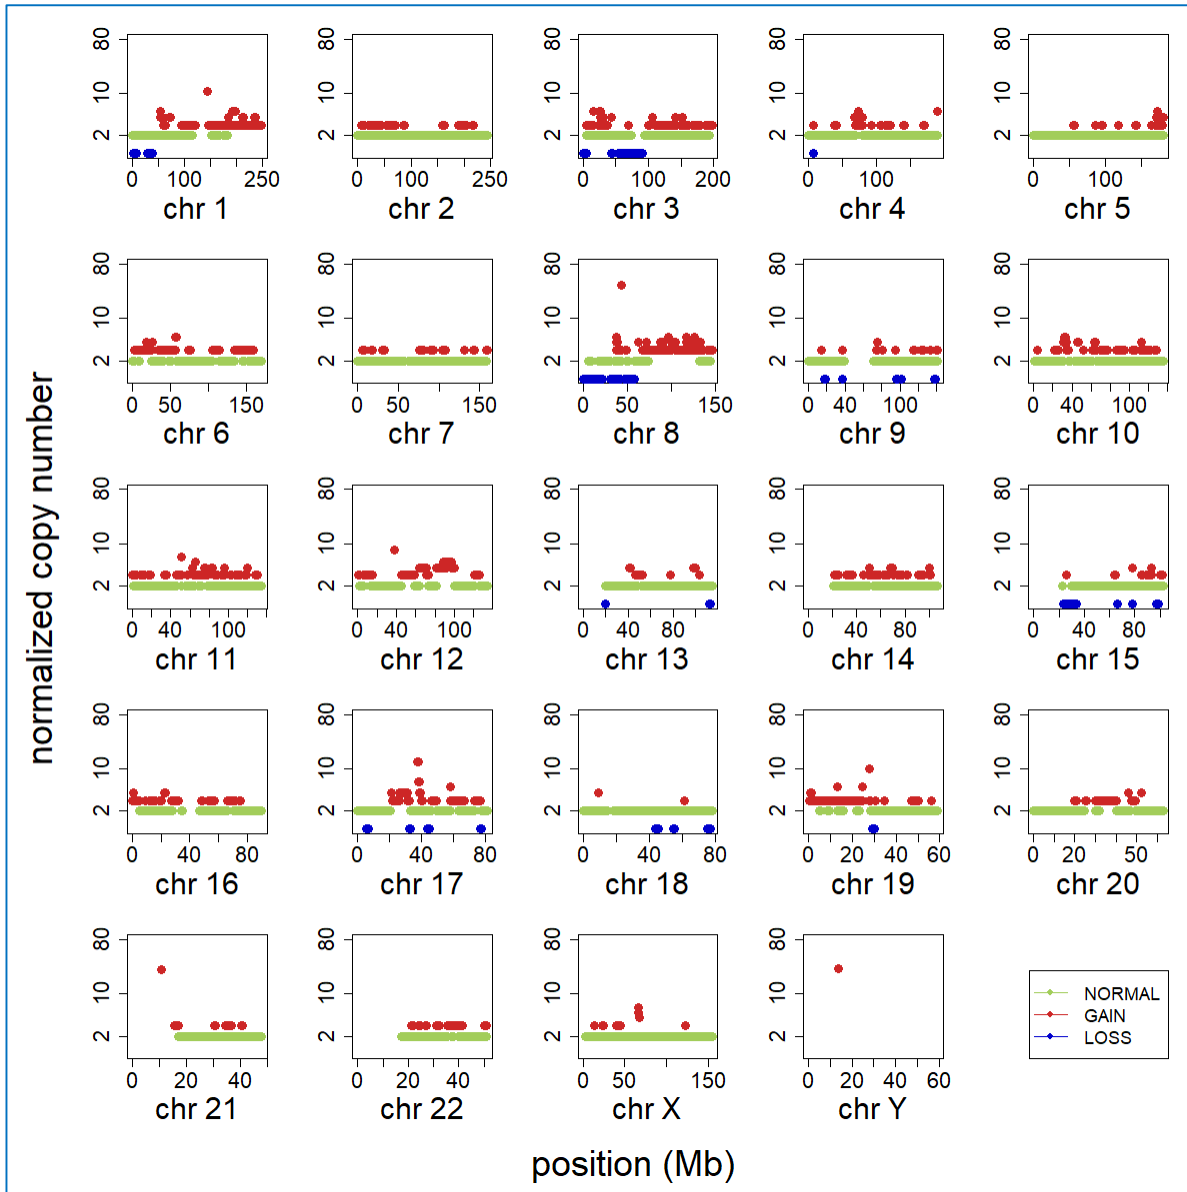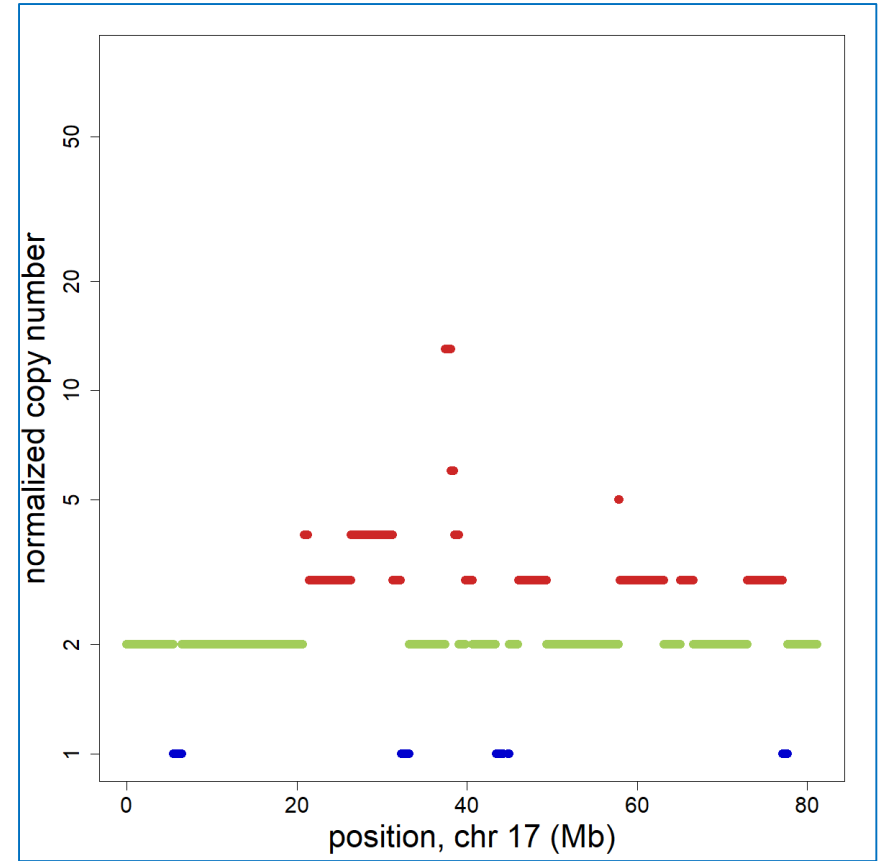

Control-FREEC

p-205

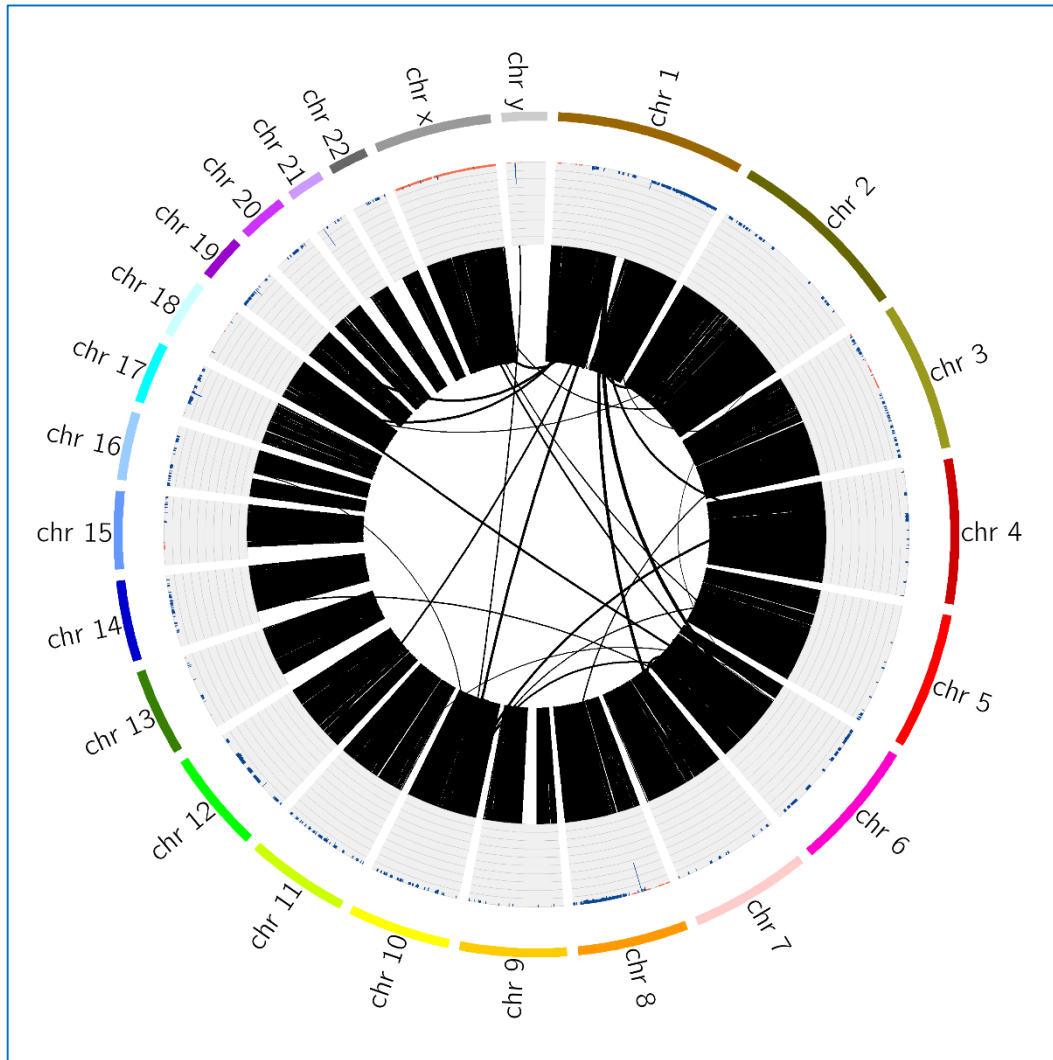

BreakDancer + Control-FREEC

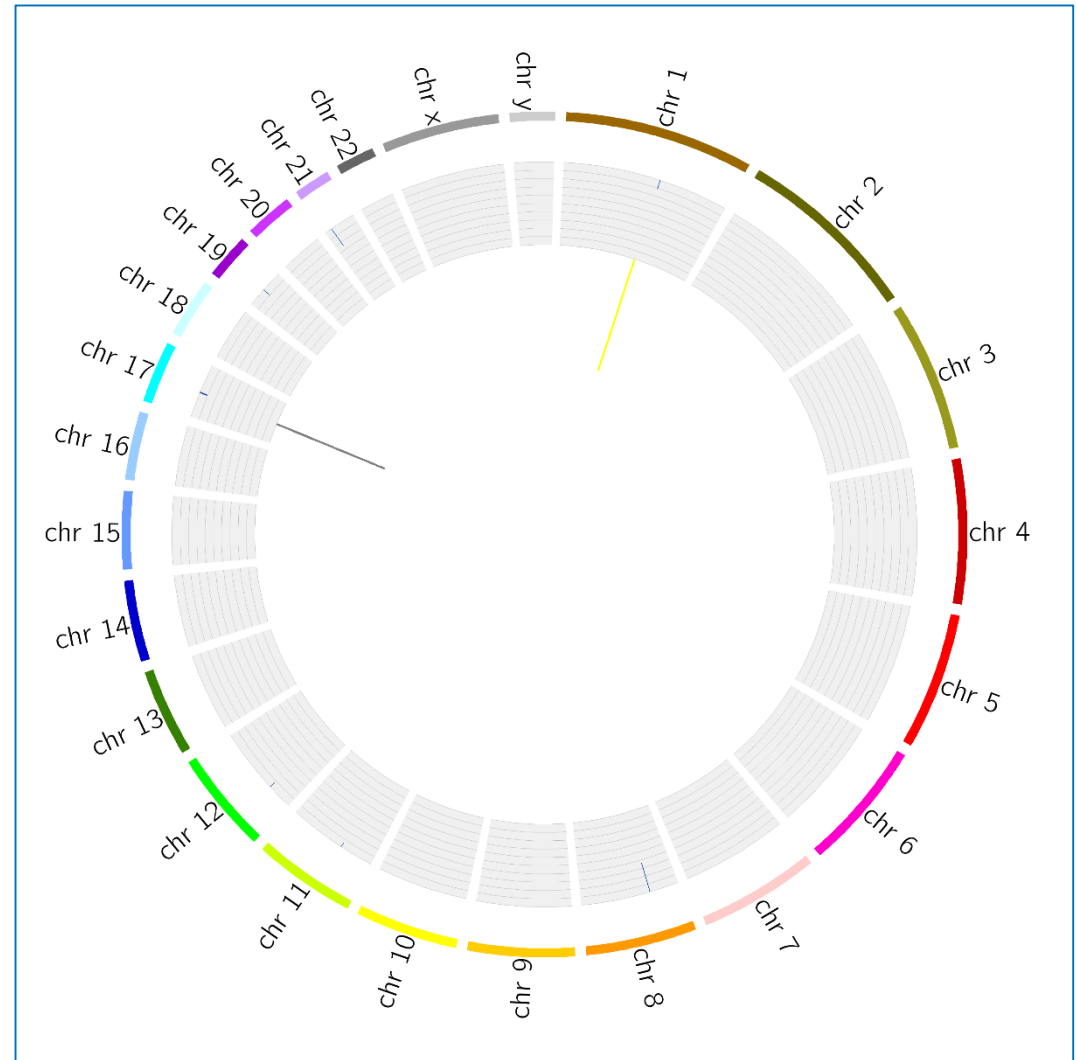

FAST - Whole Genome

p-205

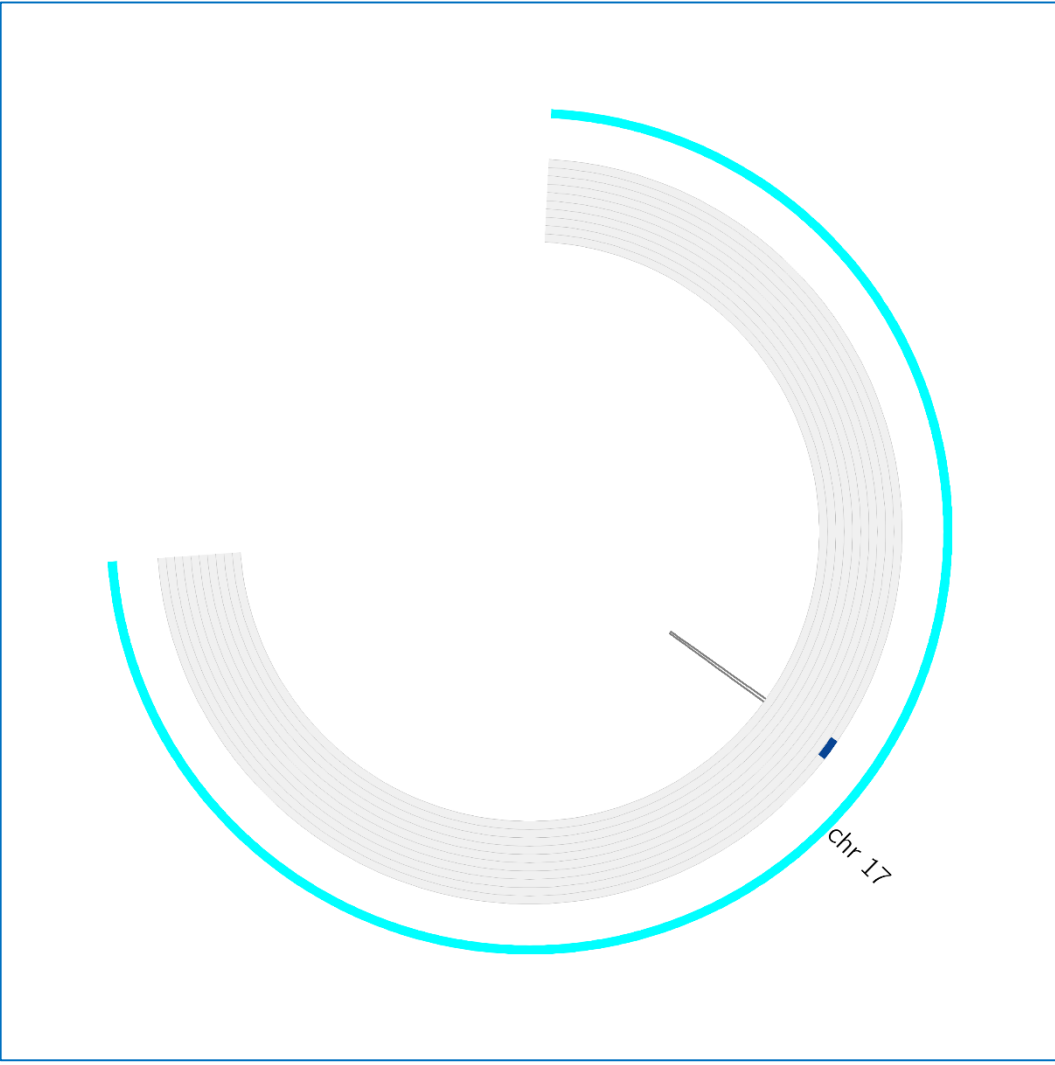

FAST – ERBB2 amplicon

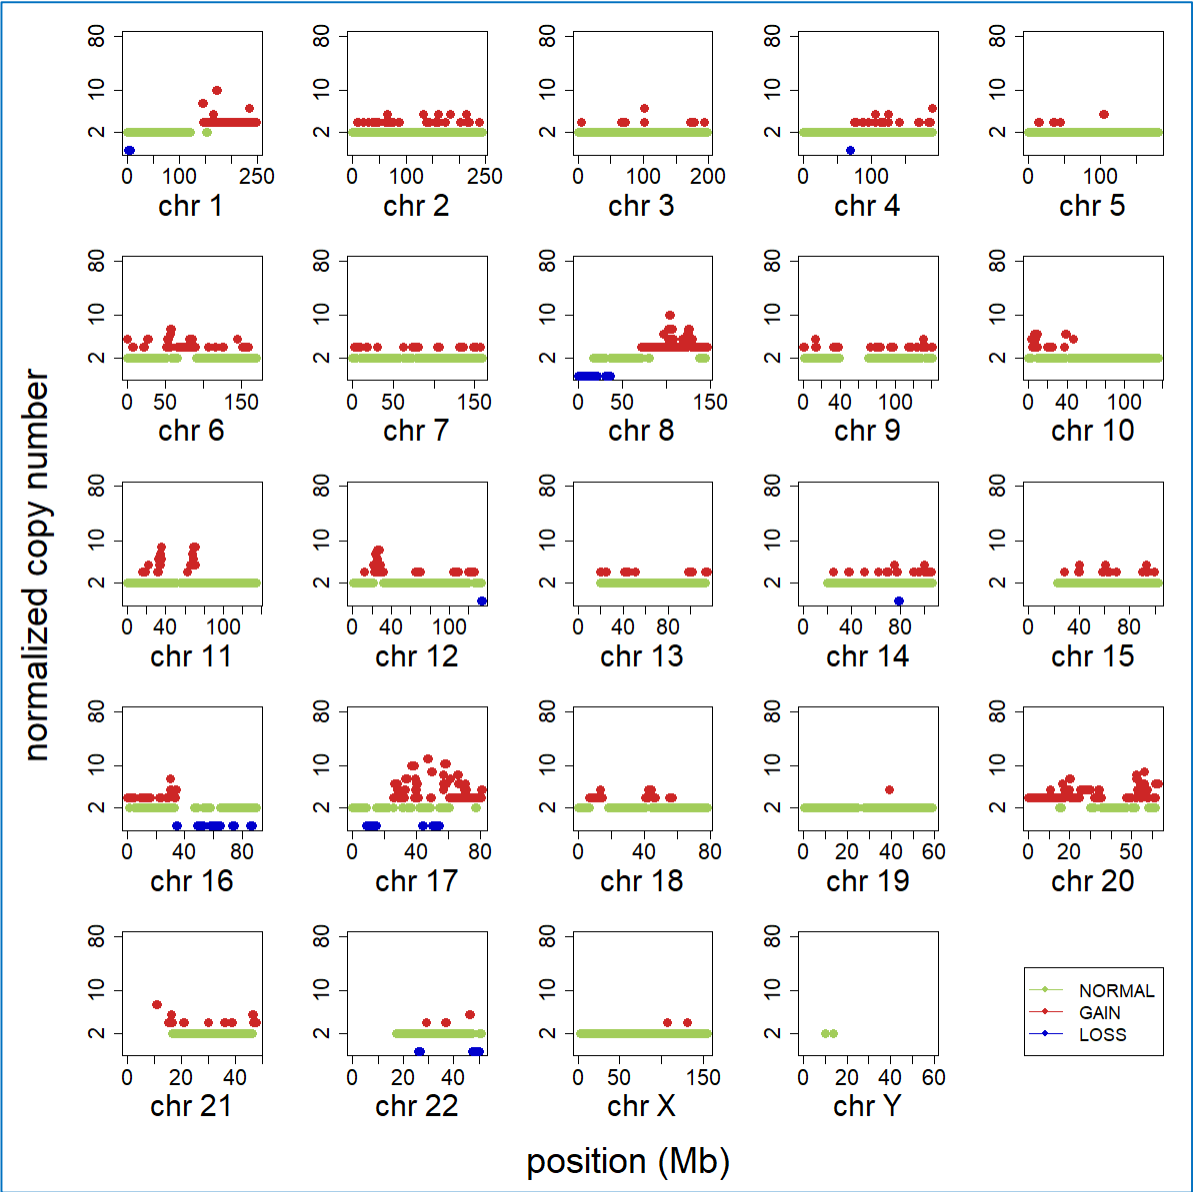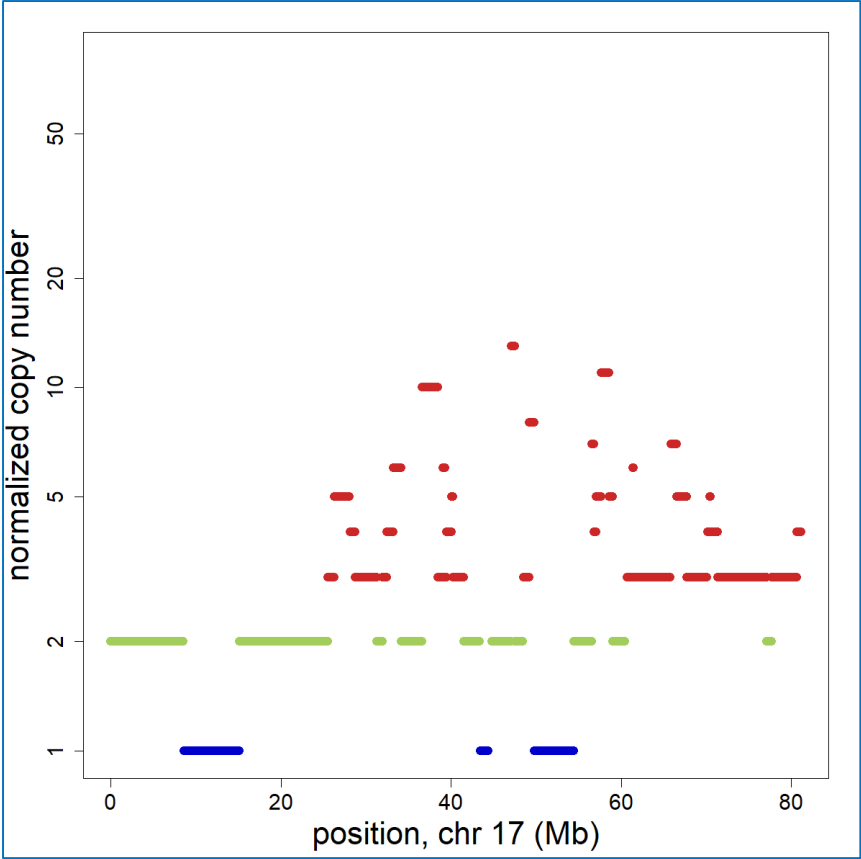

Control-FREEC

p-209

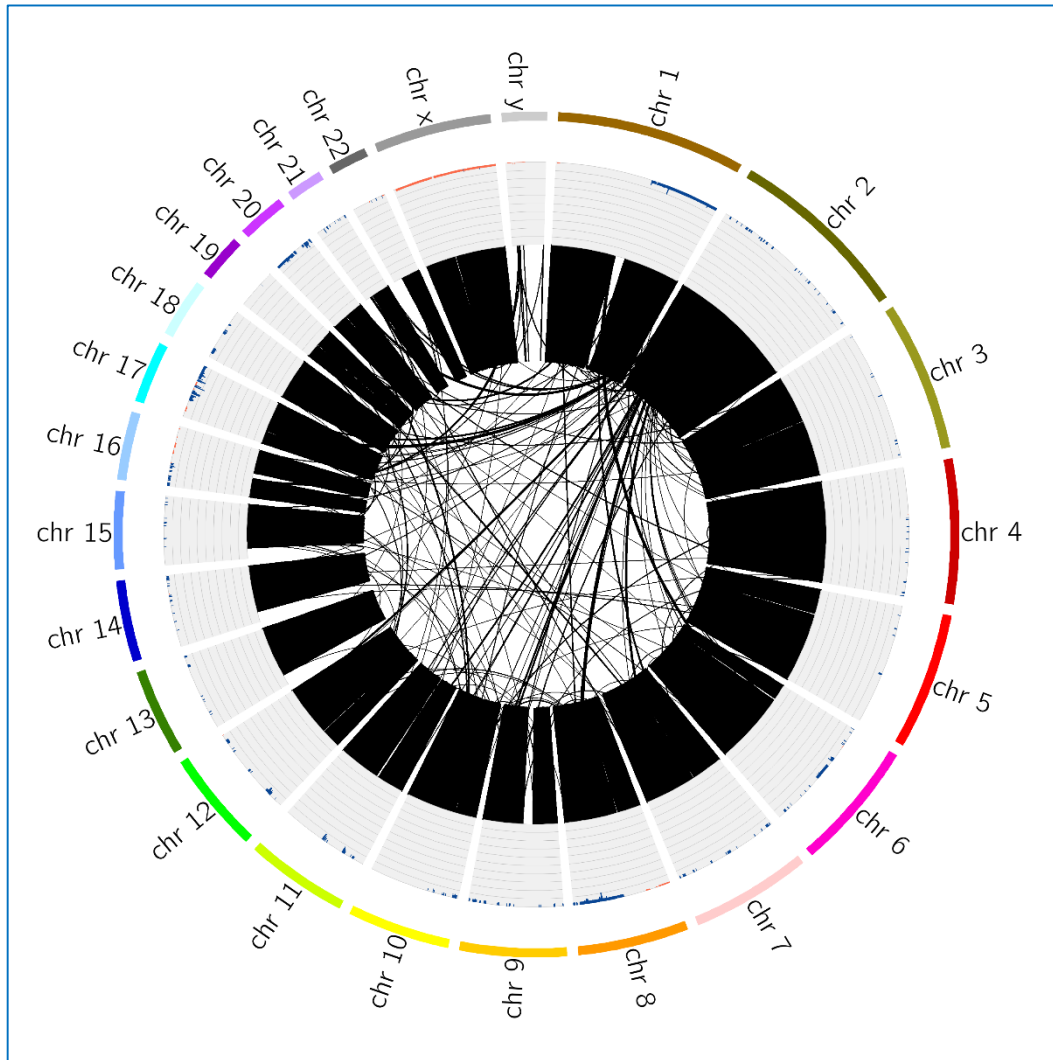

BreakDancer + Control-FREEC

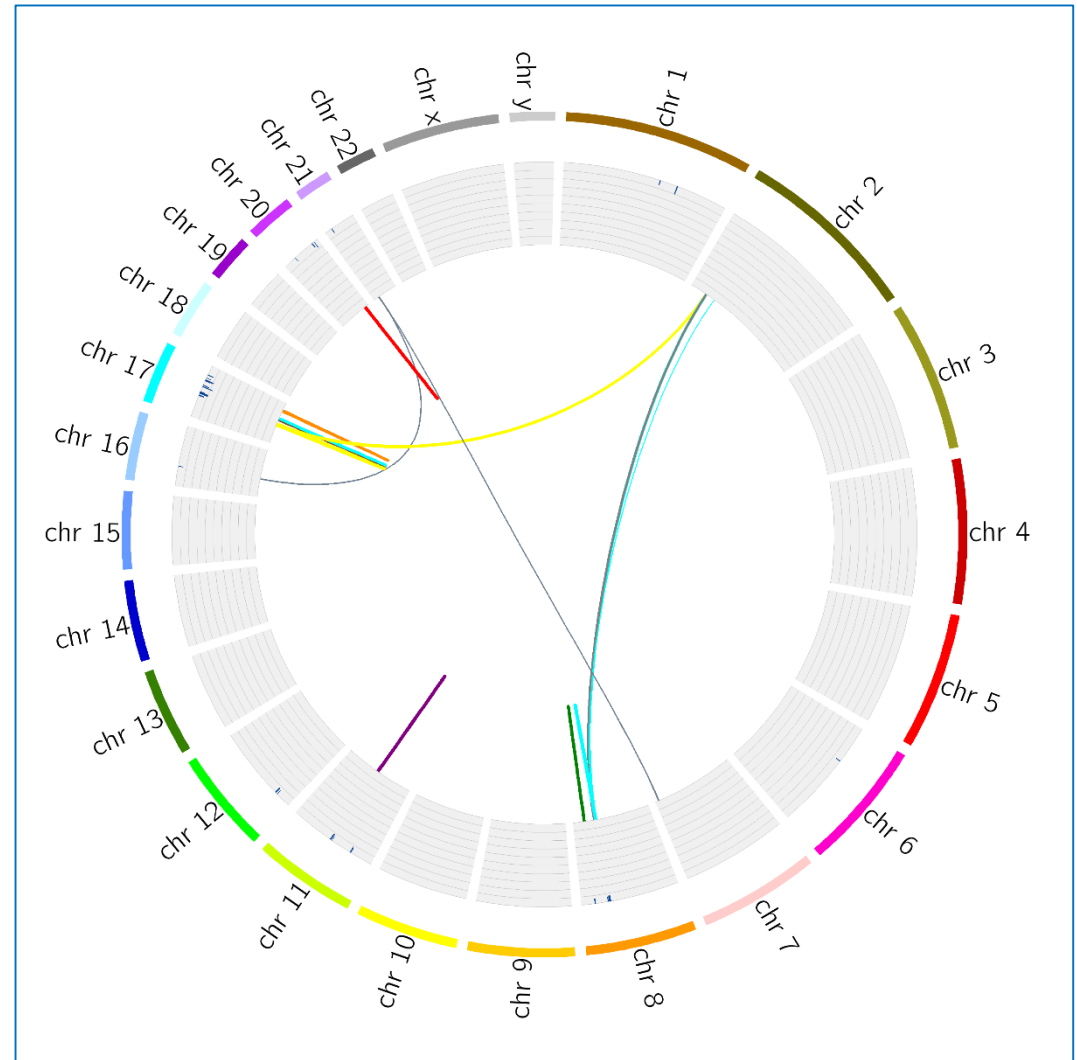

FAST - Whole Genome

p-209

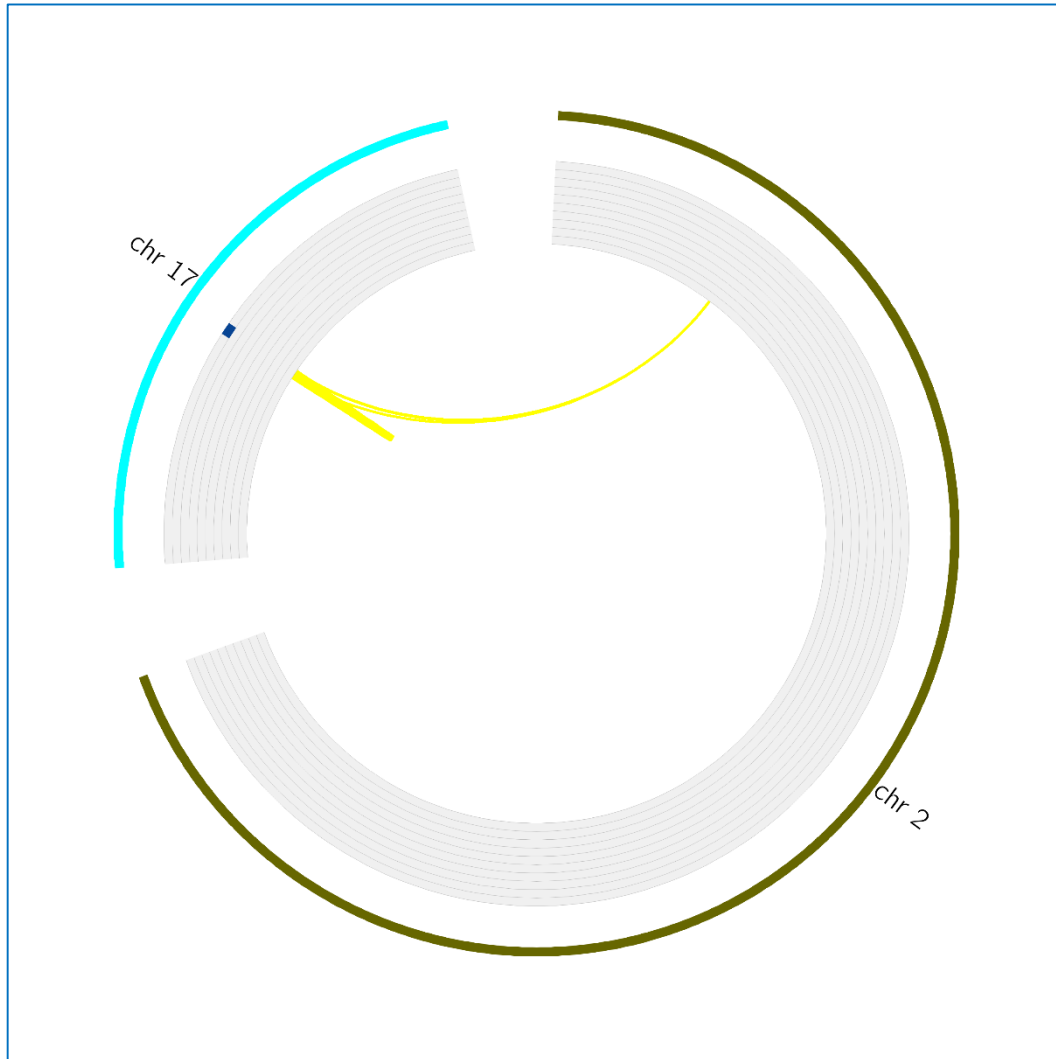

FAST – ERBB2 amplicon



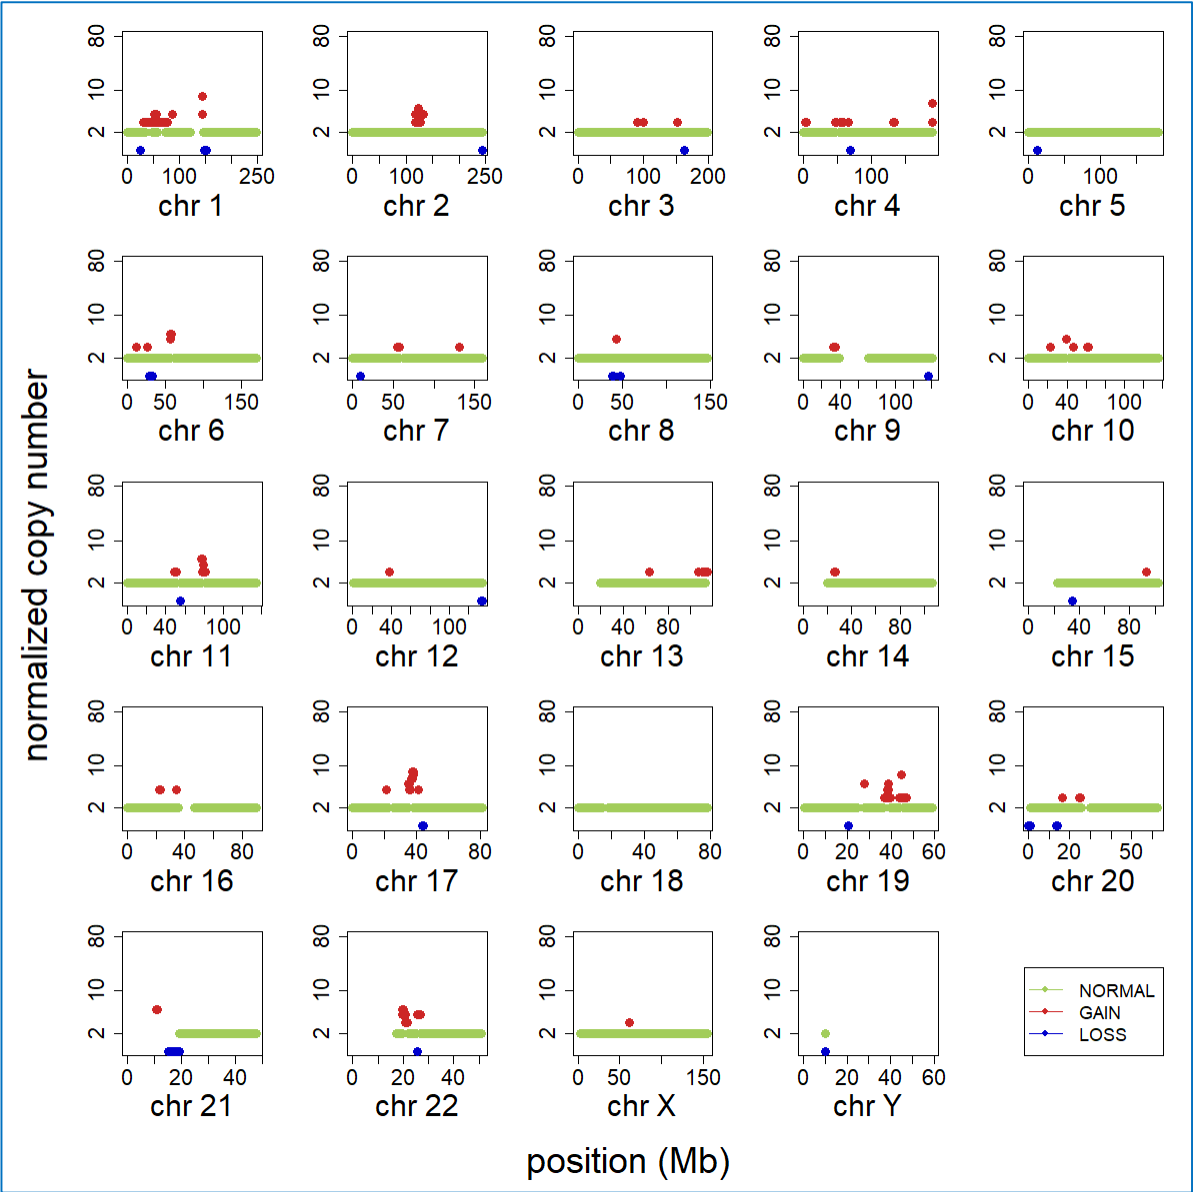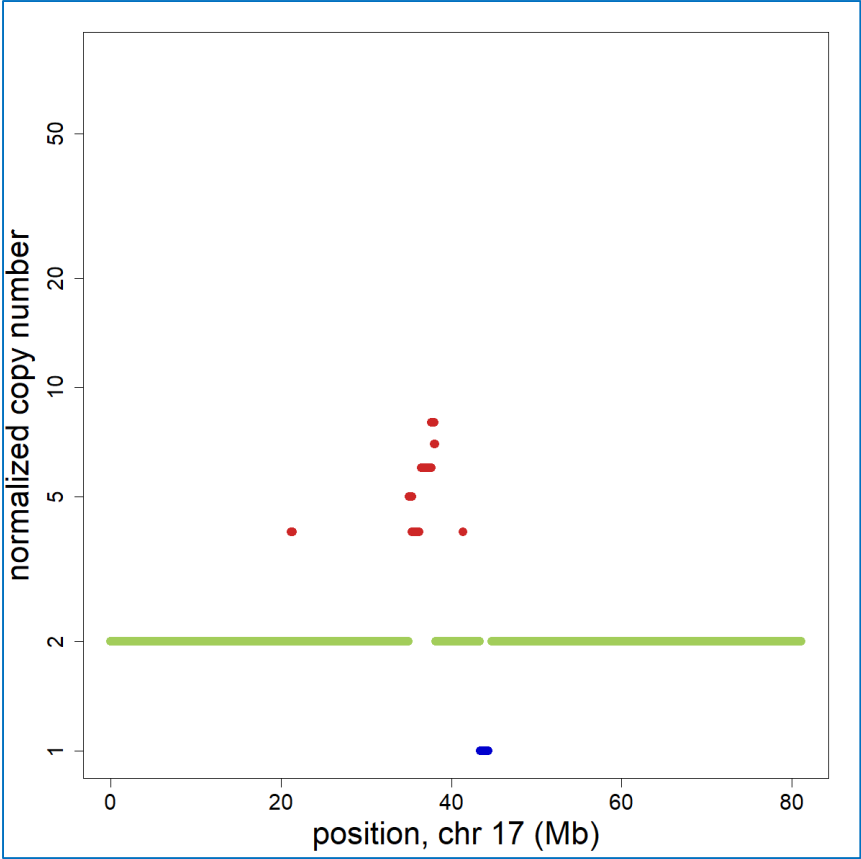

Control-FREEC

p-214

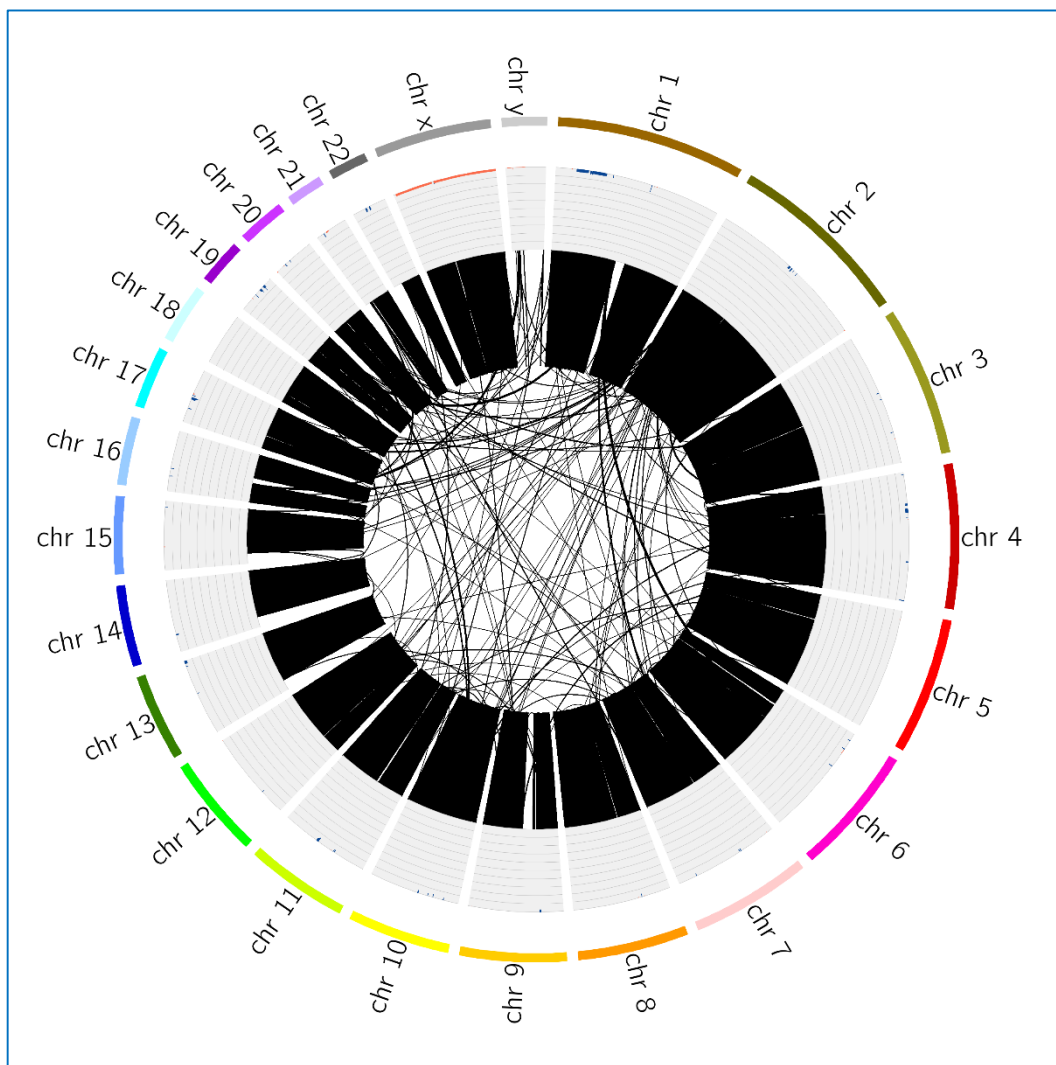

BreakDancer + Control-FREEC

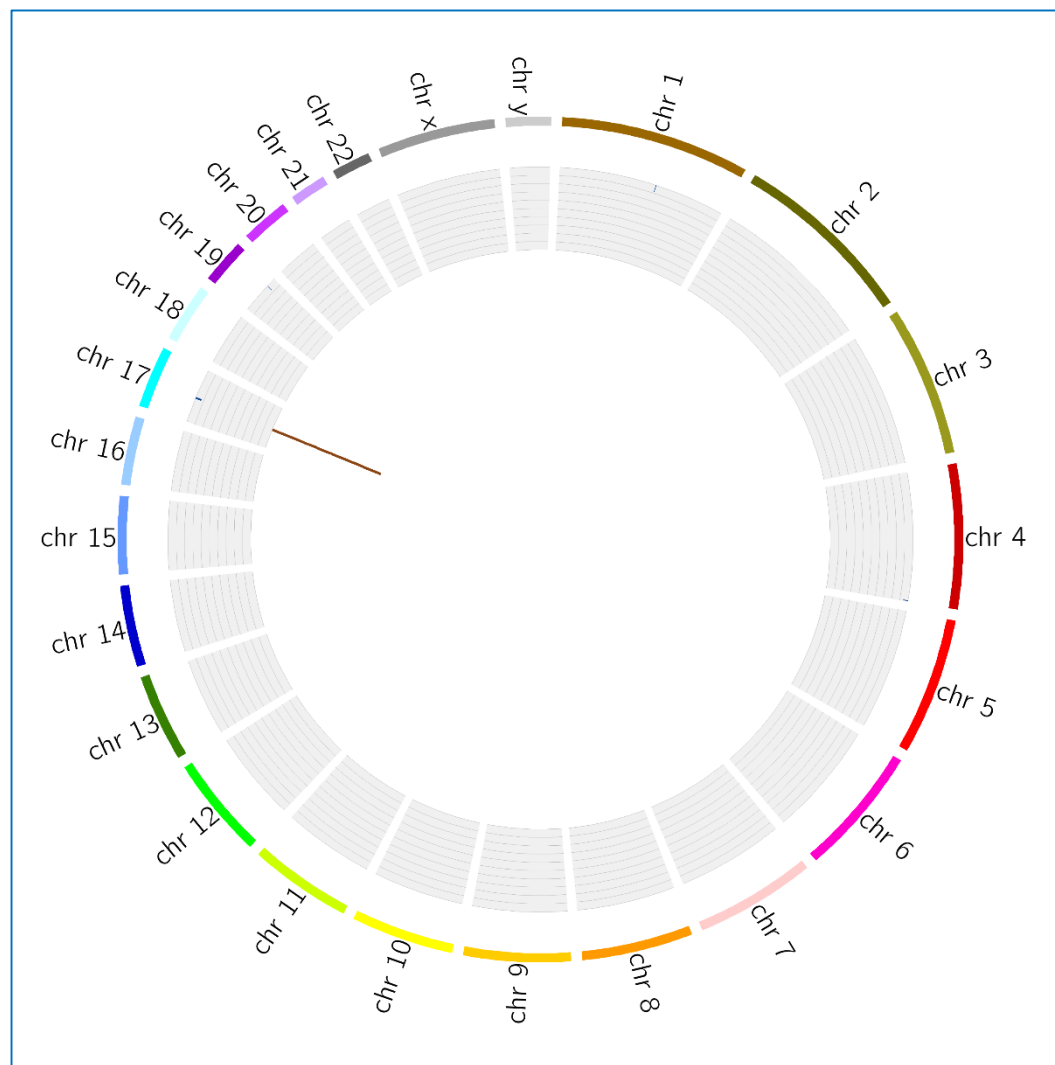

FAST - Whole Genome

p-214

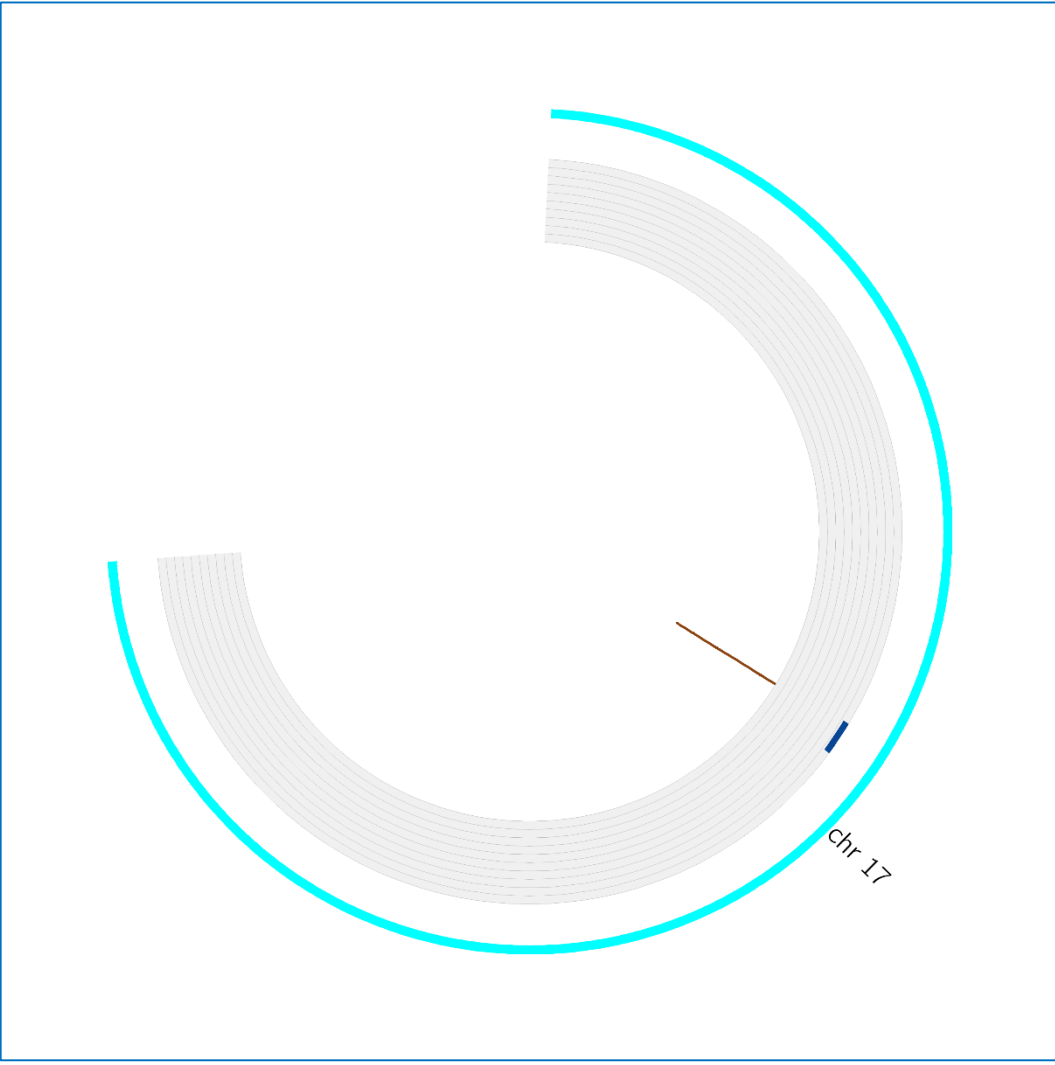

FAST – ERBB2 amplicon

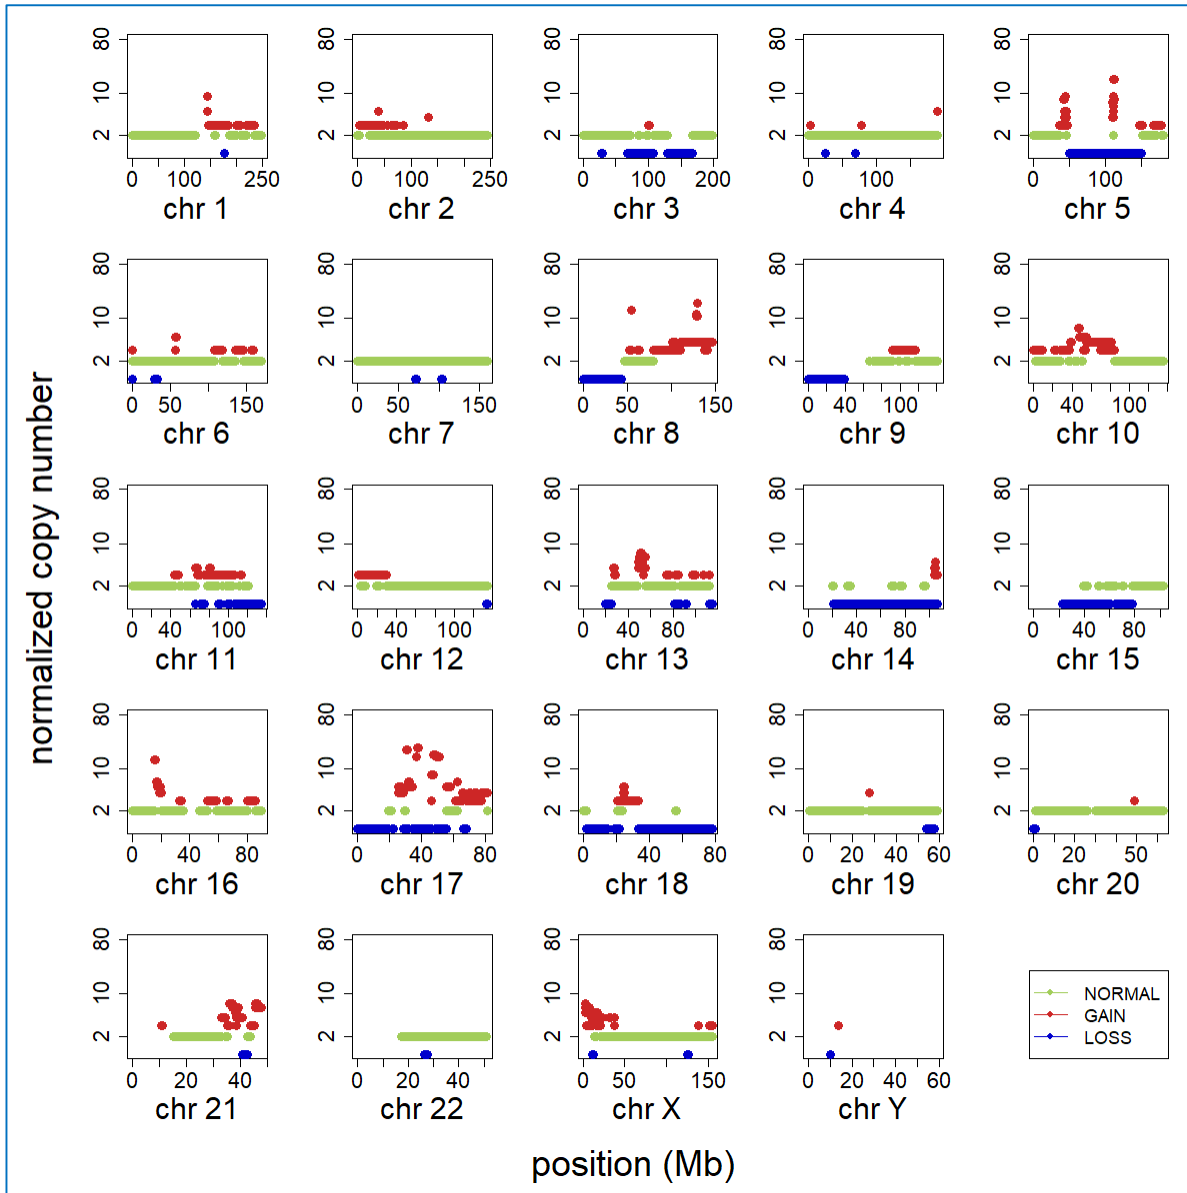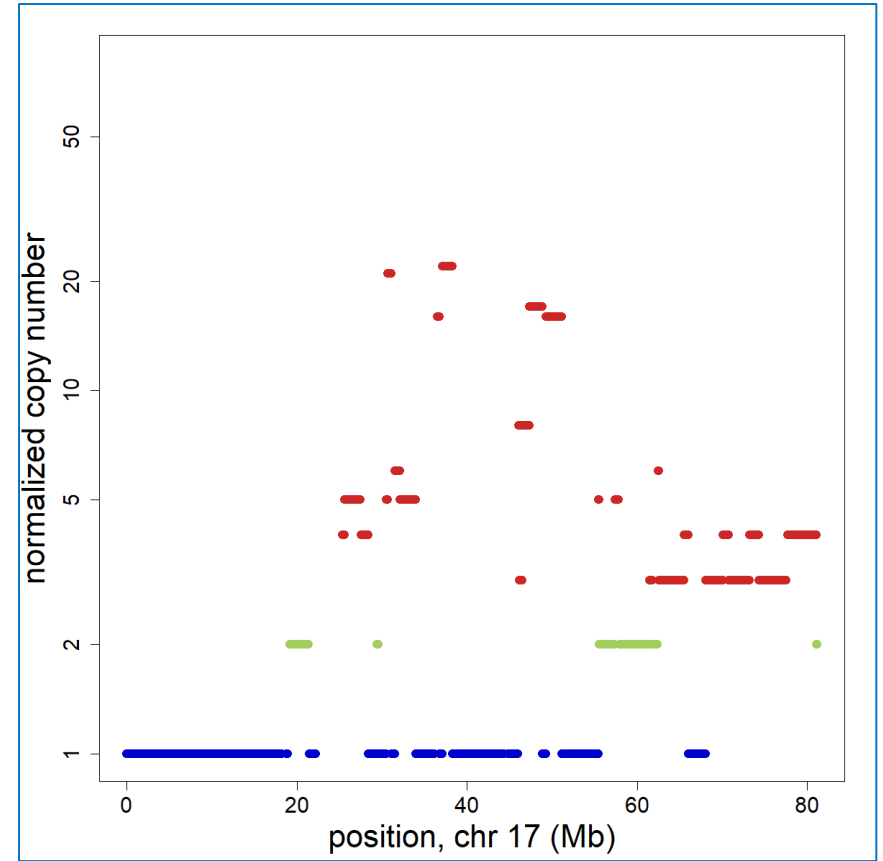

p-215

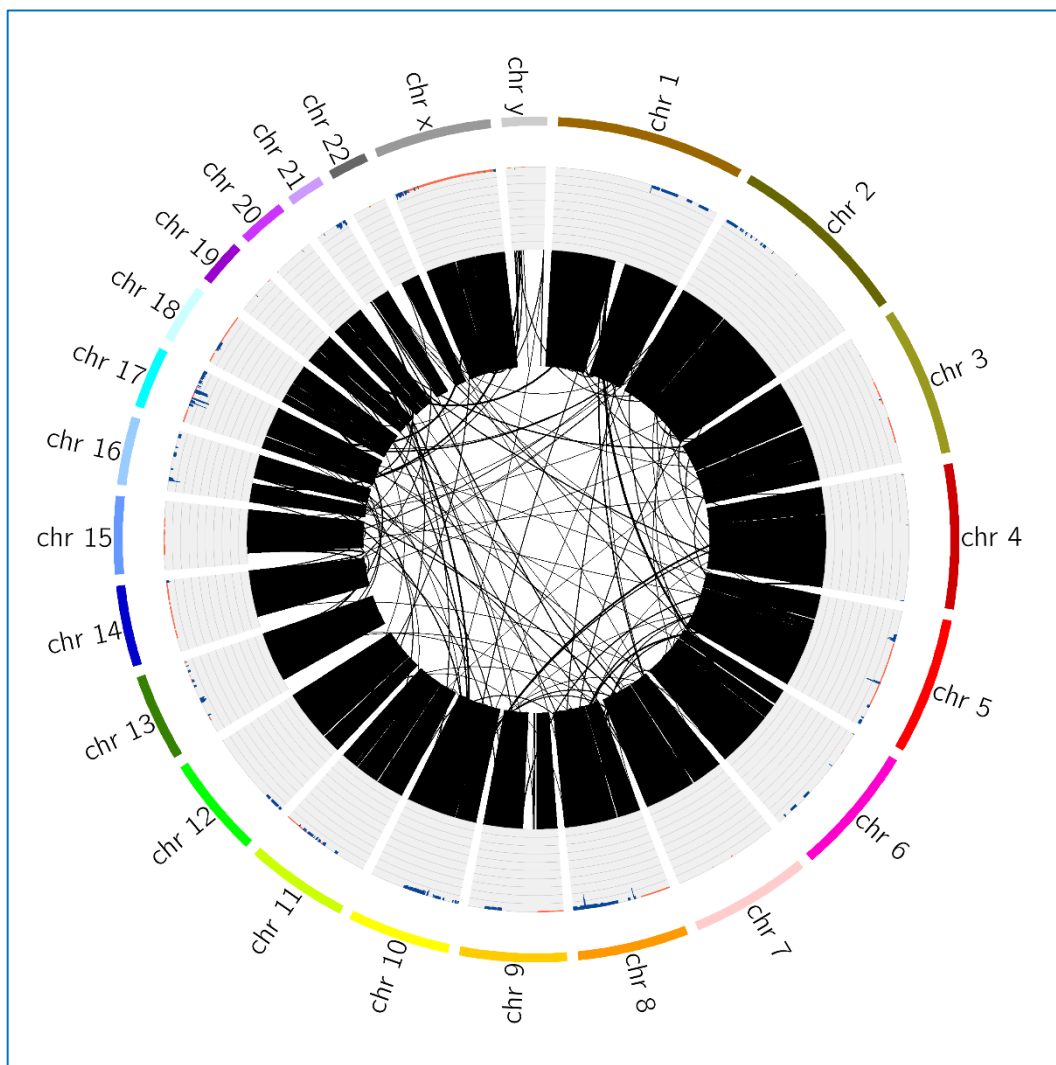

BreakDancer + Control-FREEC

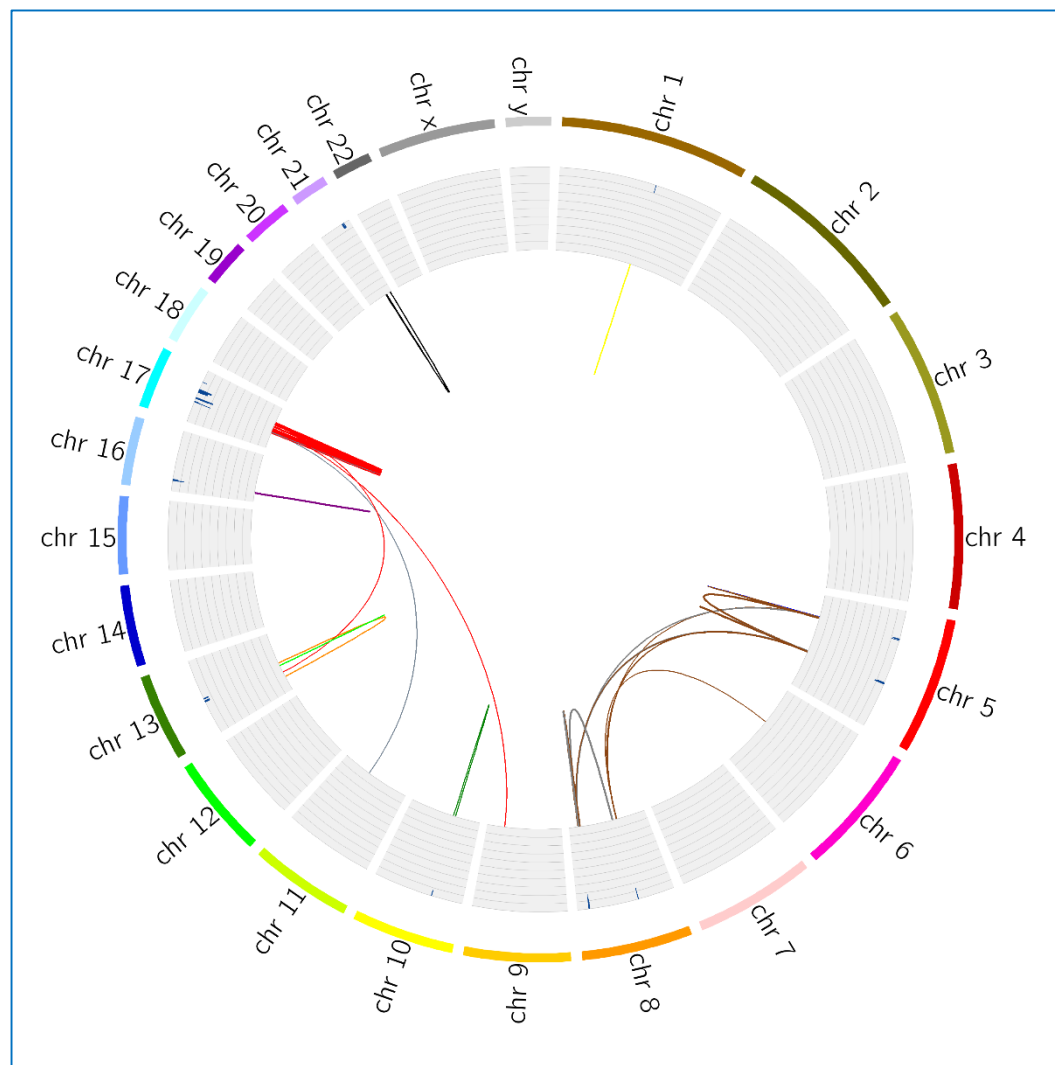

FAST - Whole Genome

p-215

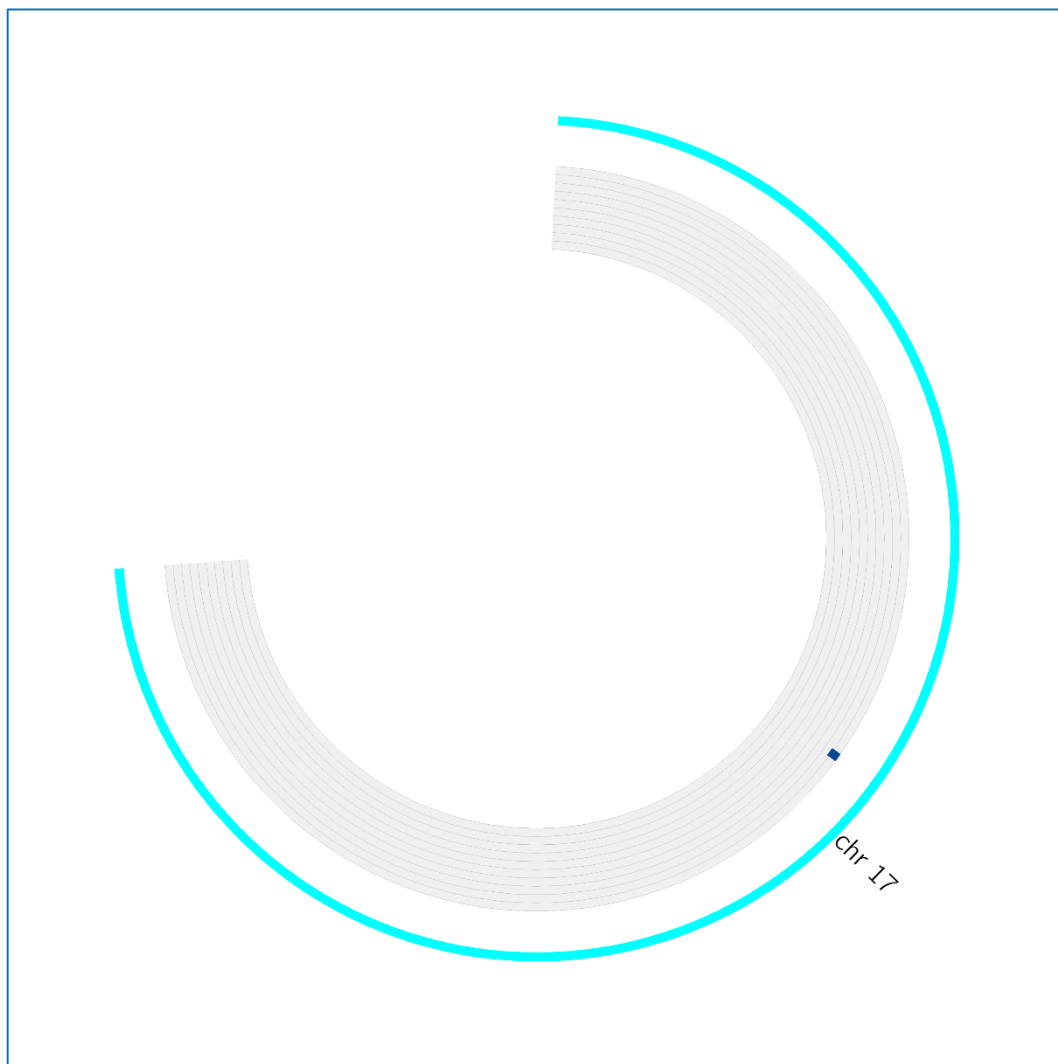

FAST – ERBB2 amplicon

p-216

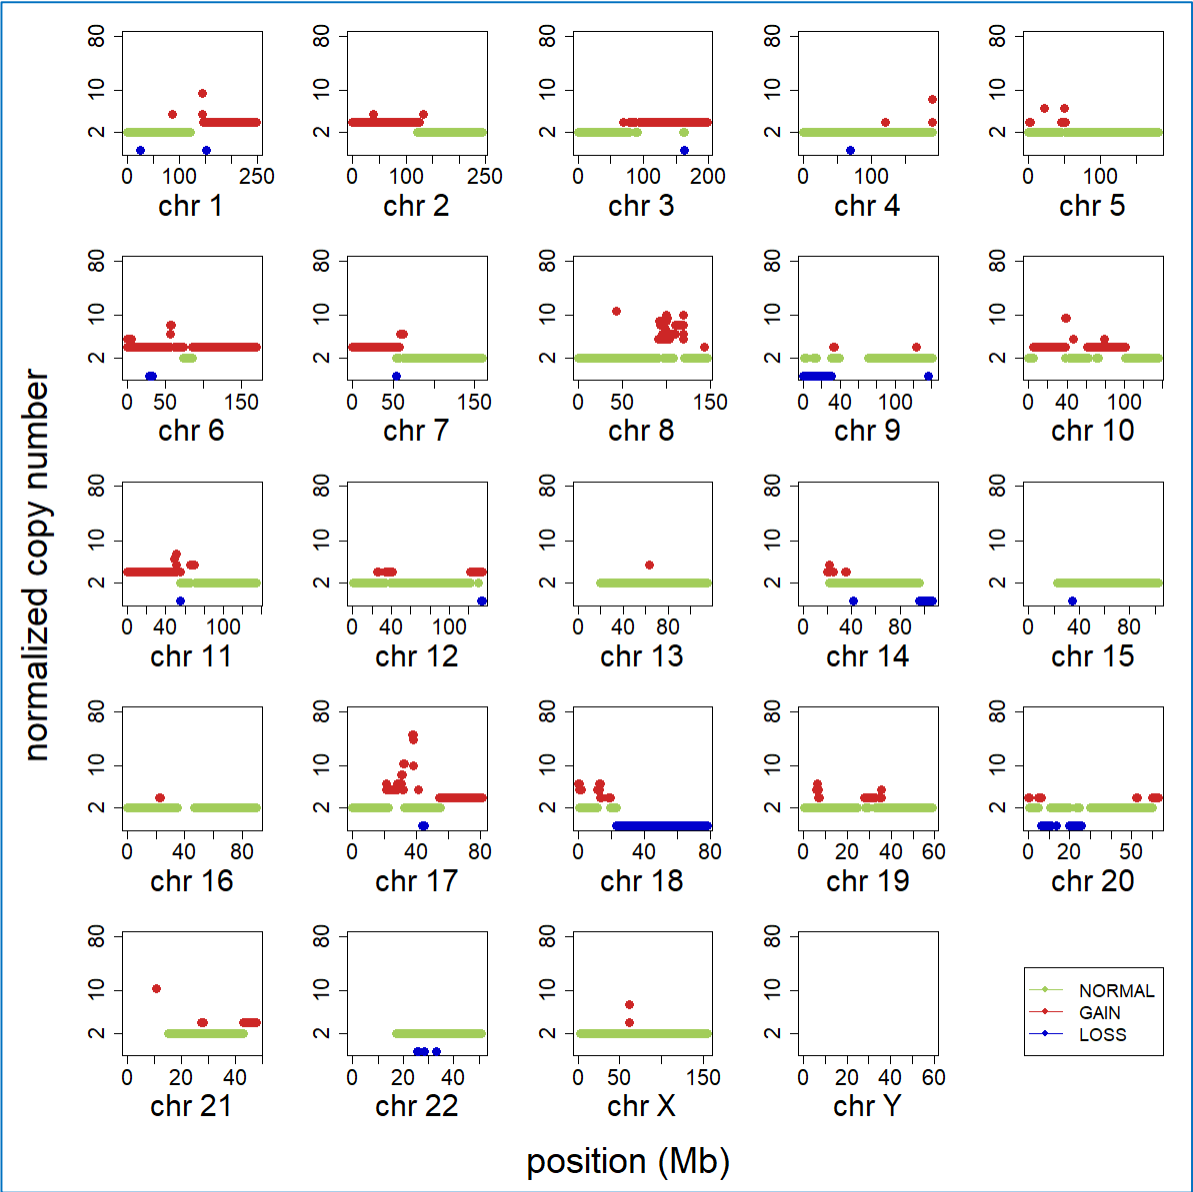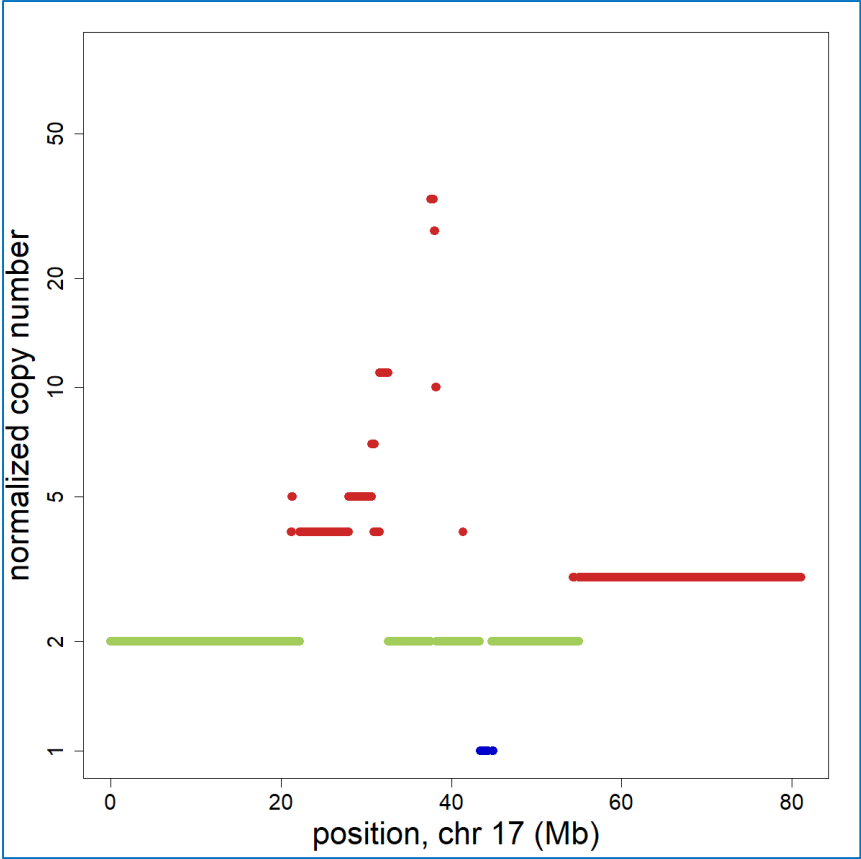

Control-FREEC

p-216

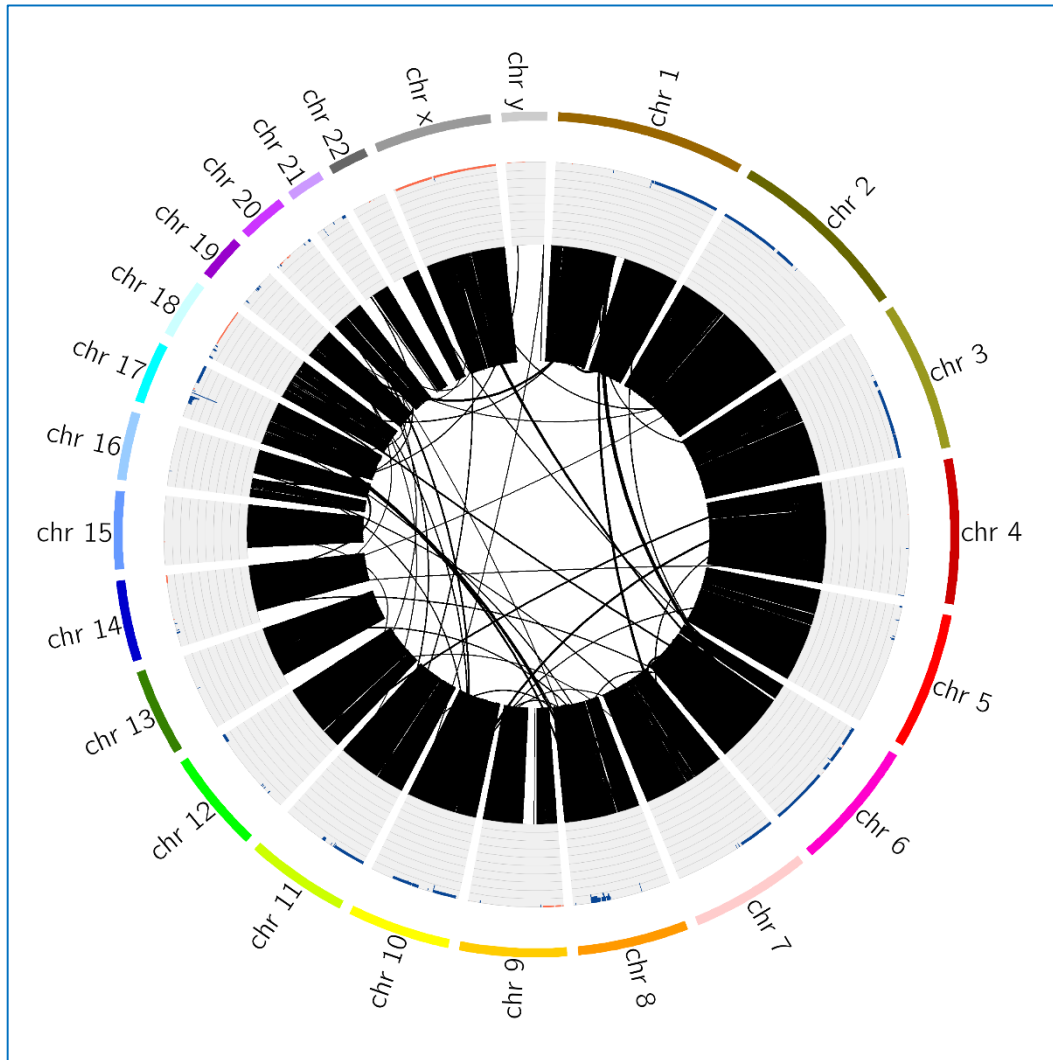

BreakDancer + Control-FREEC

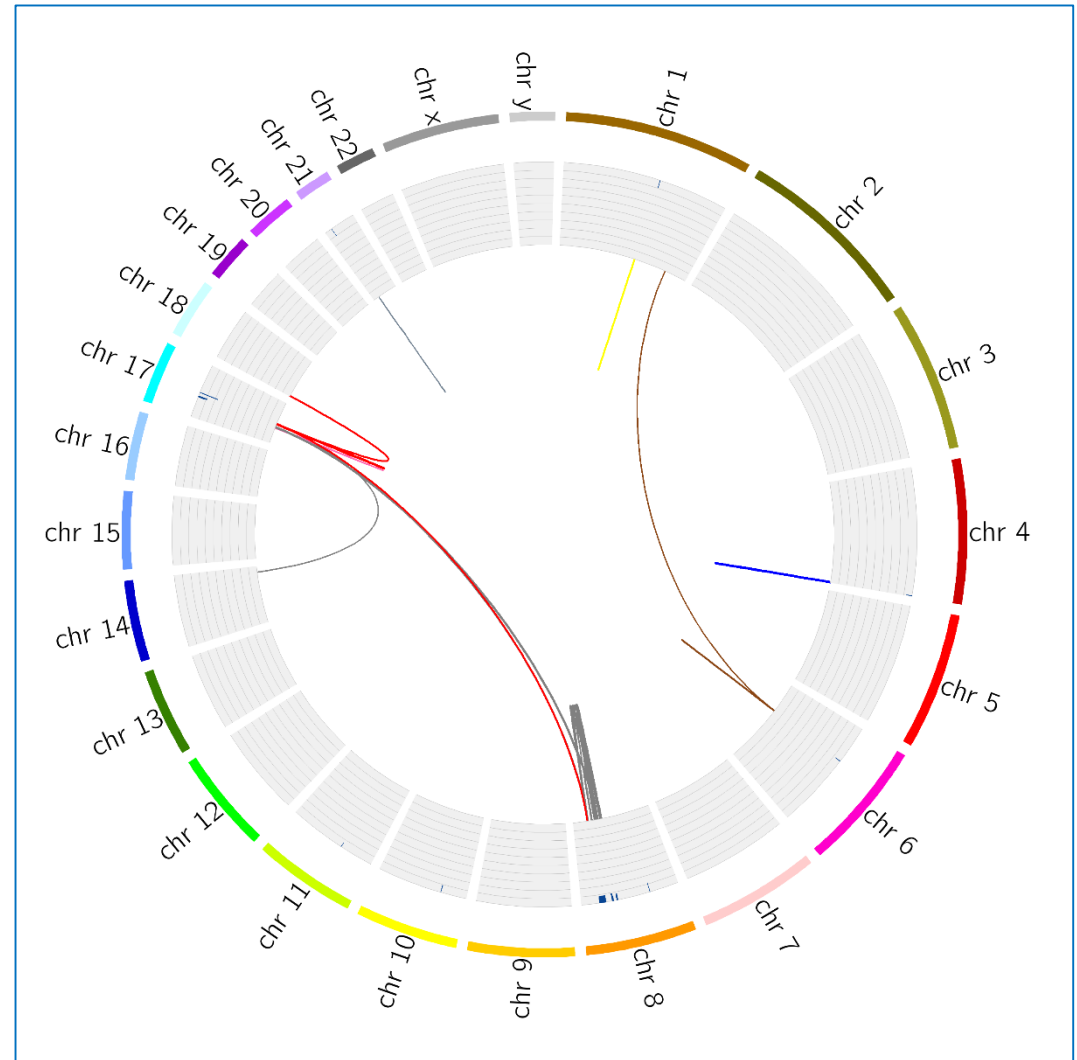

FAST - Whole Genome



p-216

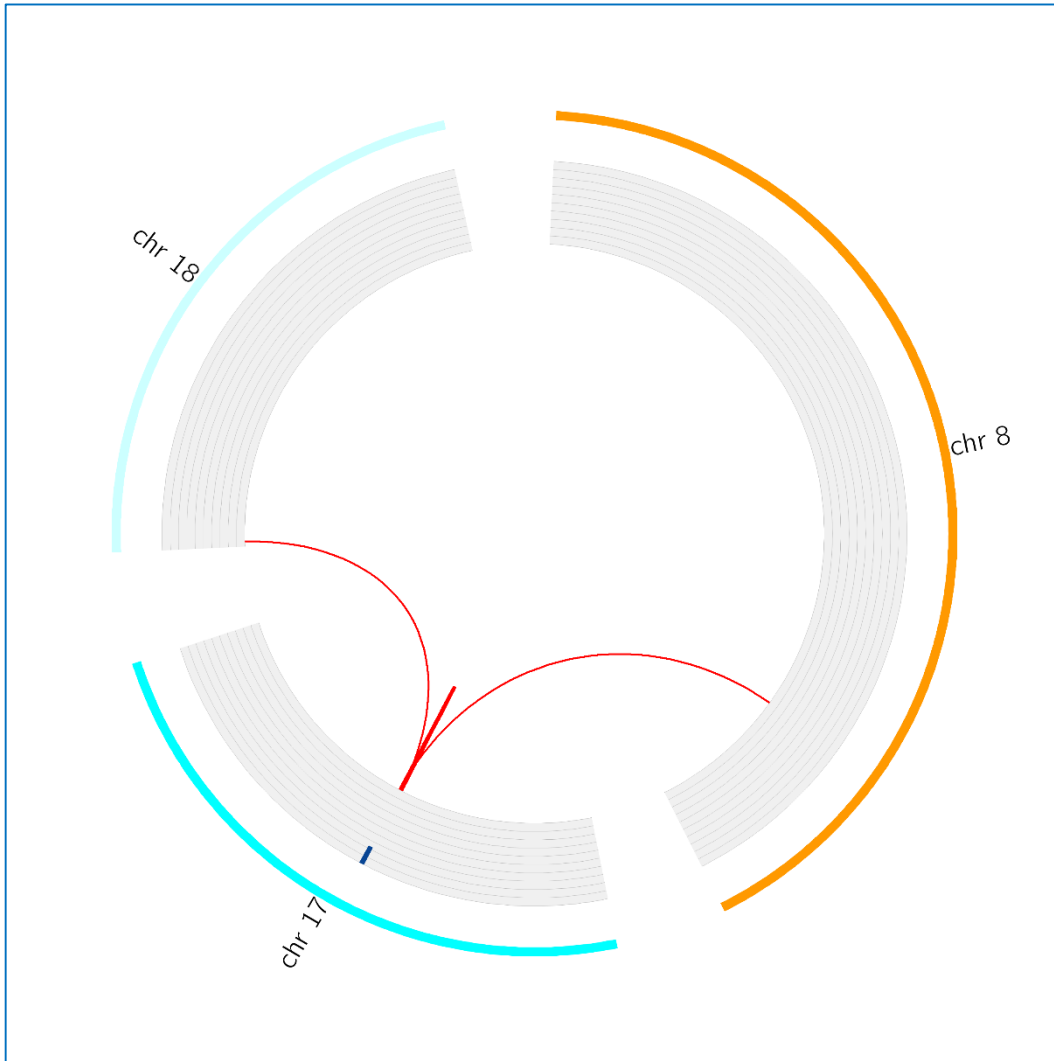

FAST – ERBB2 amplicon

p-217

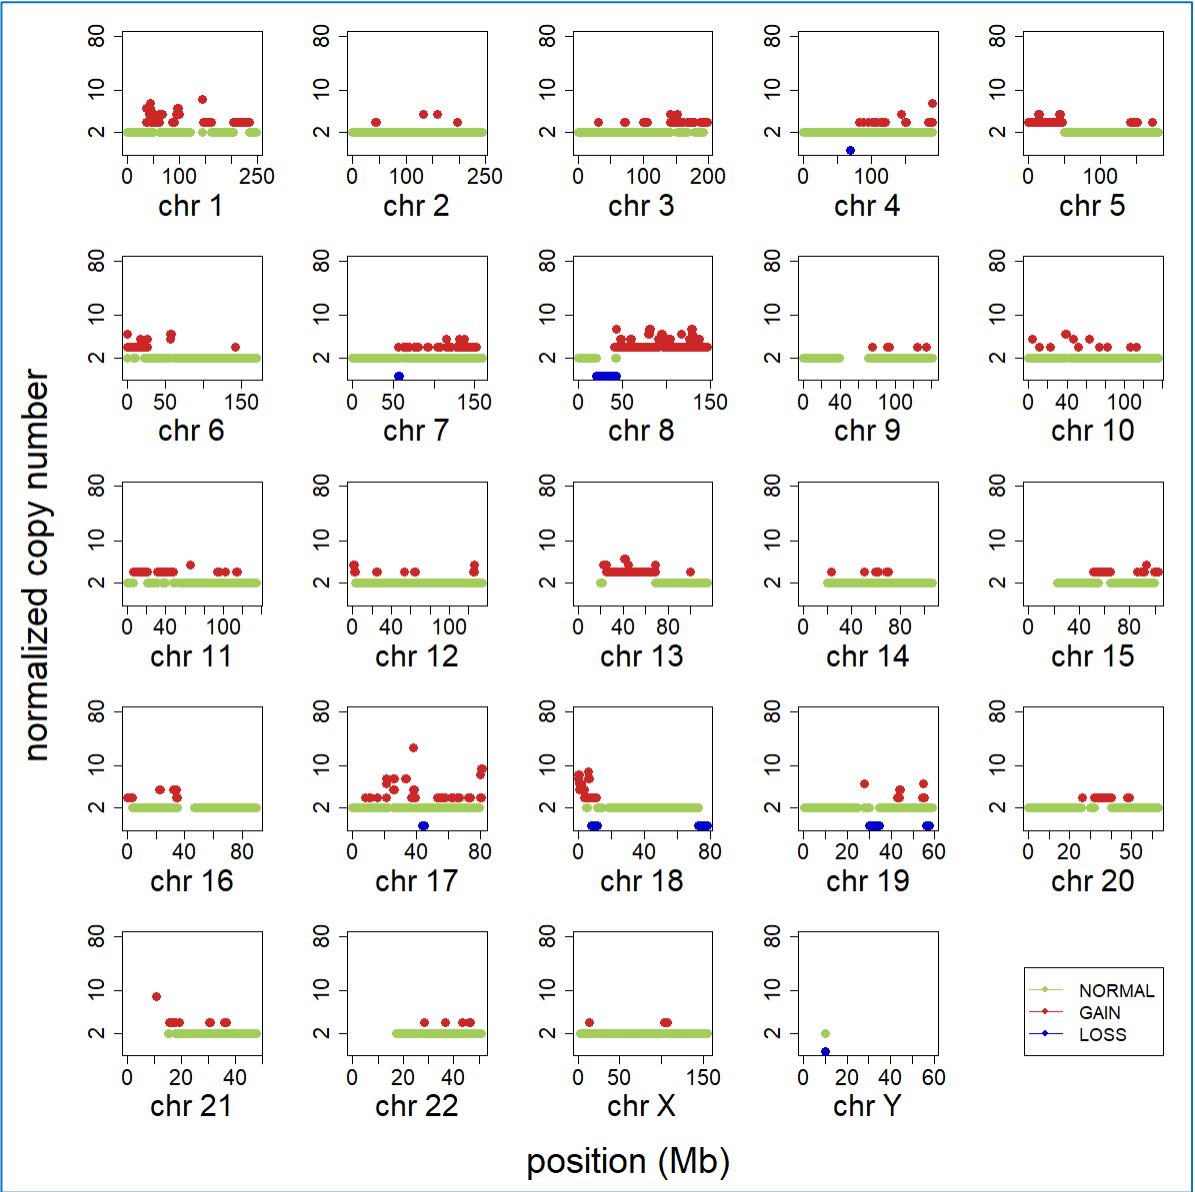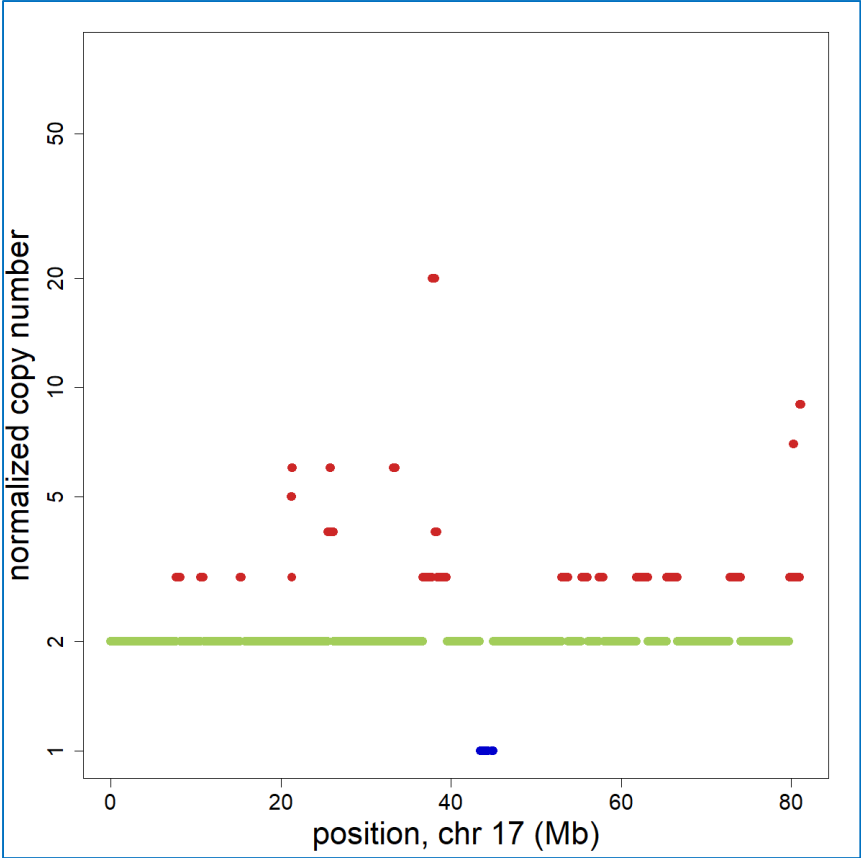

Control-FREEC

p-217

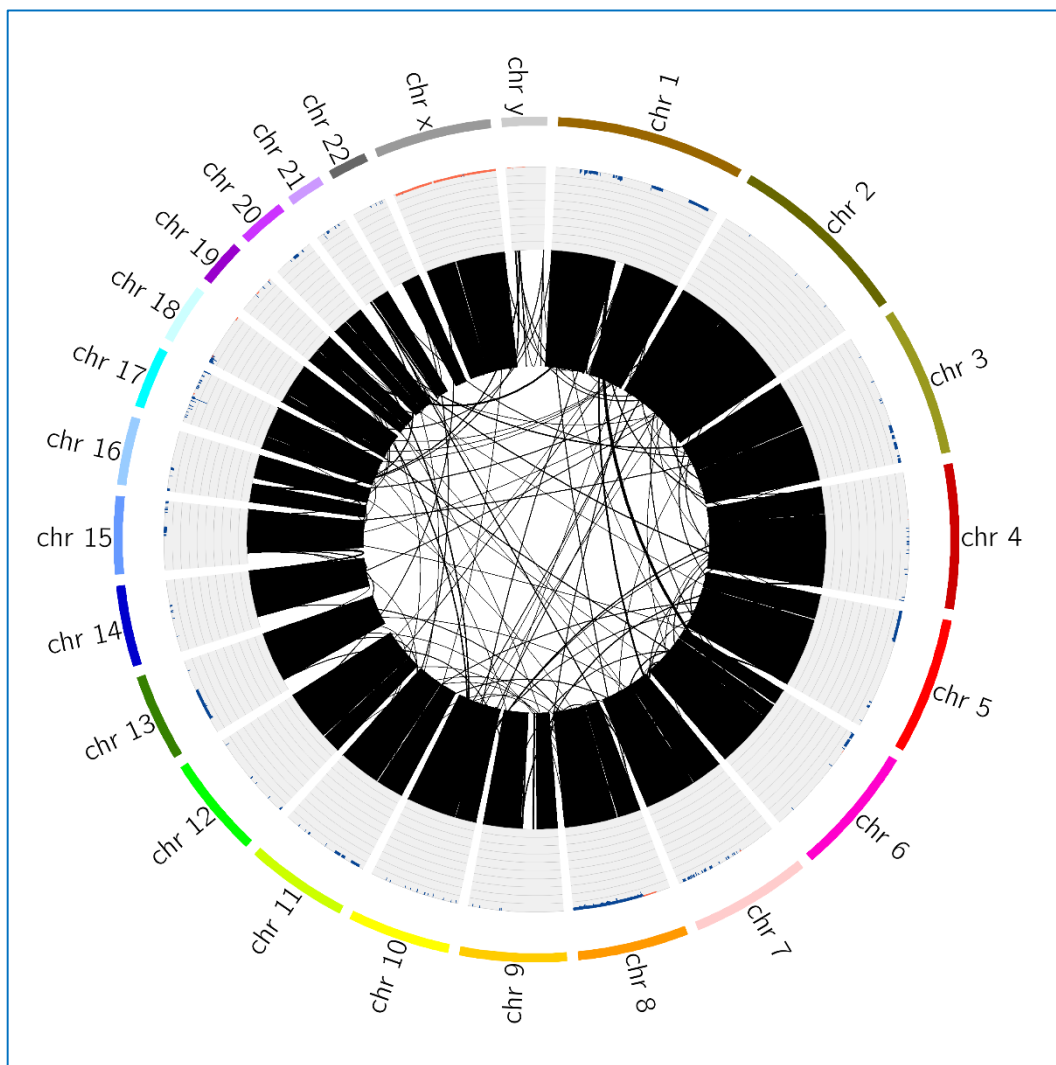

BreakDancer + Control-FREEC

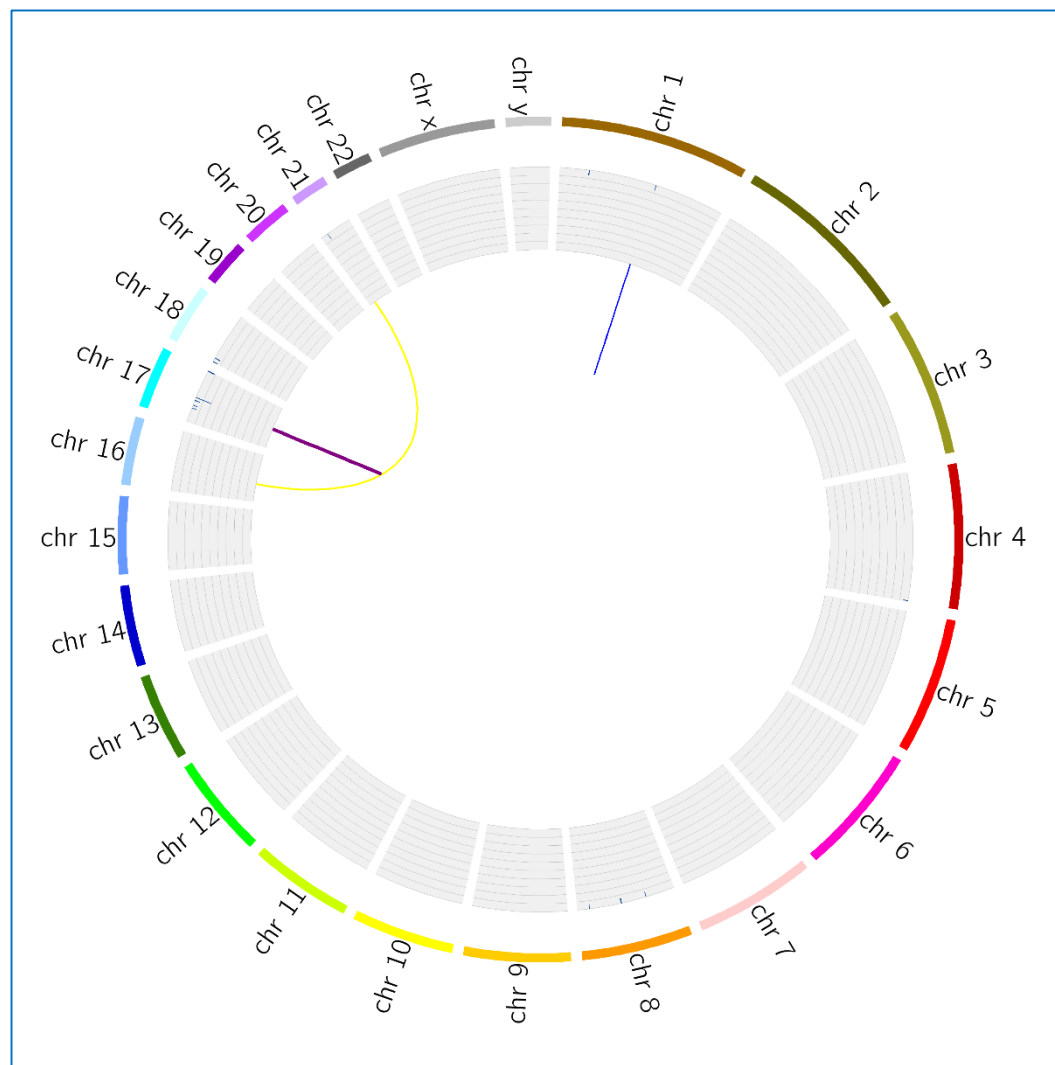

FAST - Whole Genome

p-217

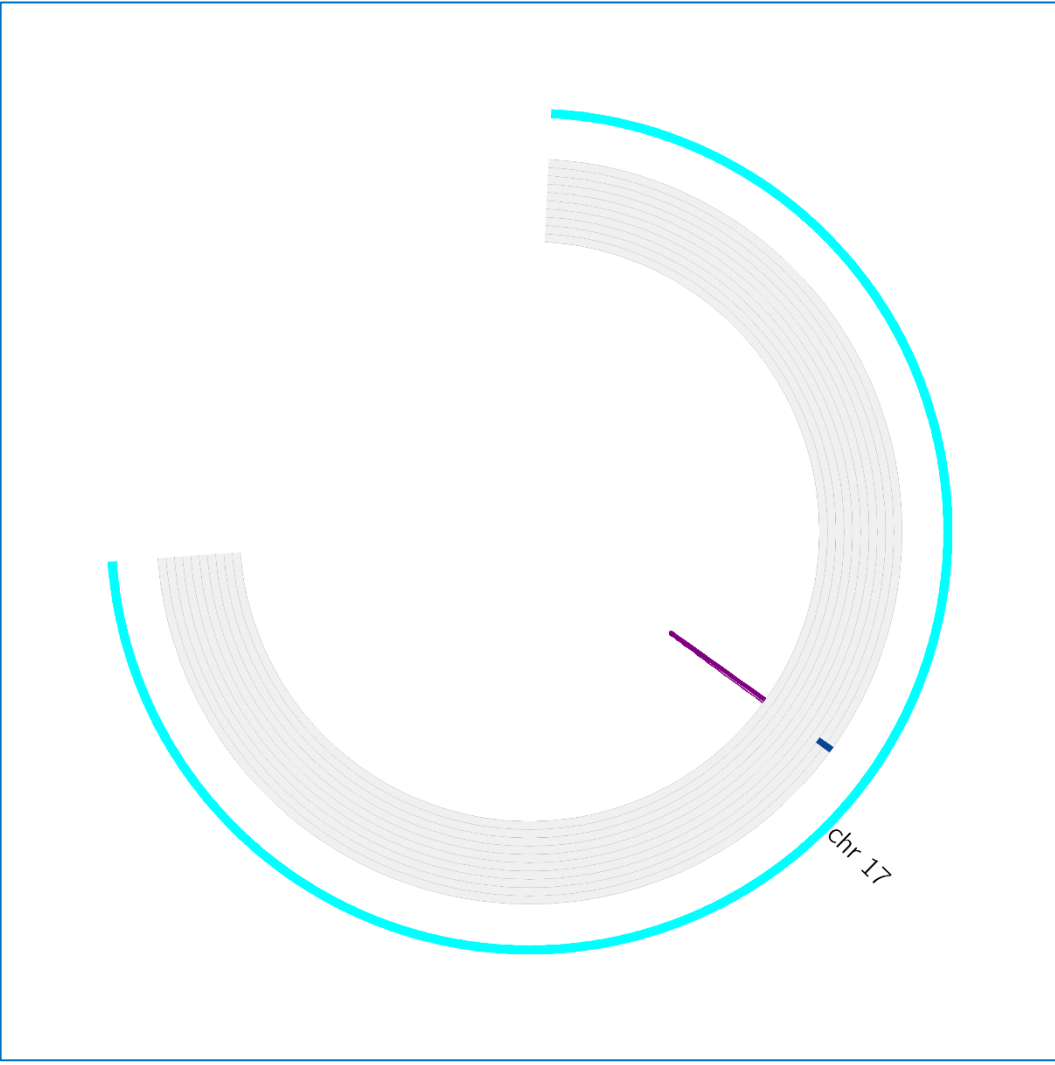

FAST – ERBB2 amplicon

p-218

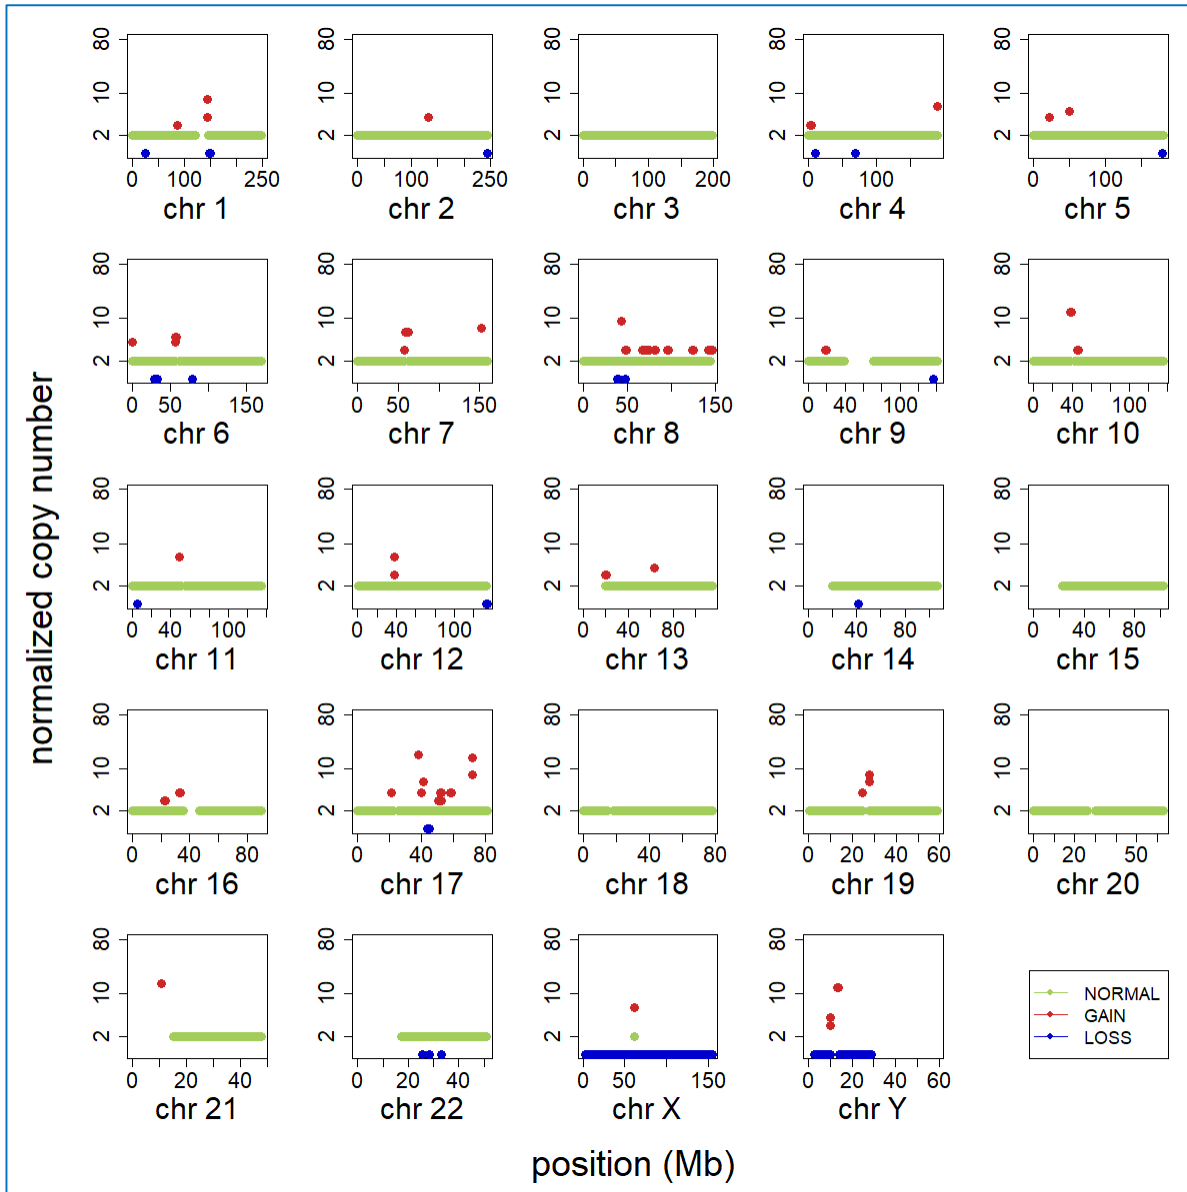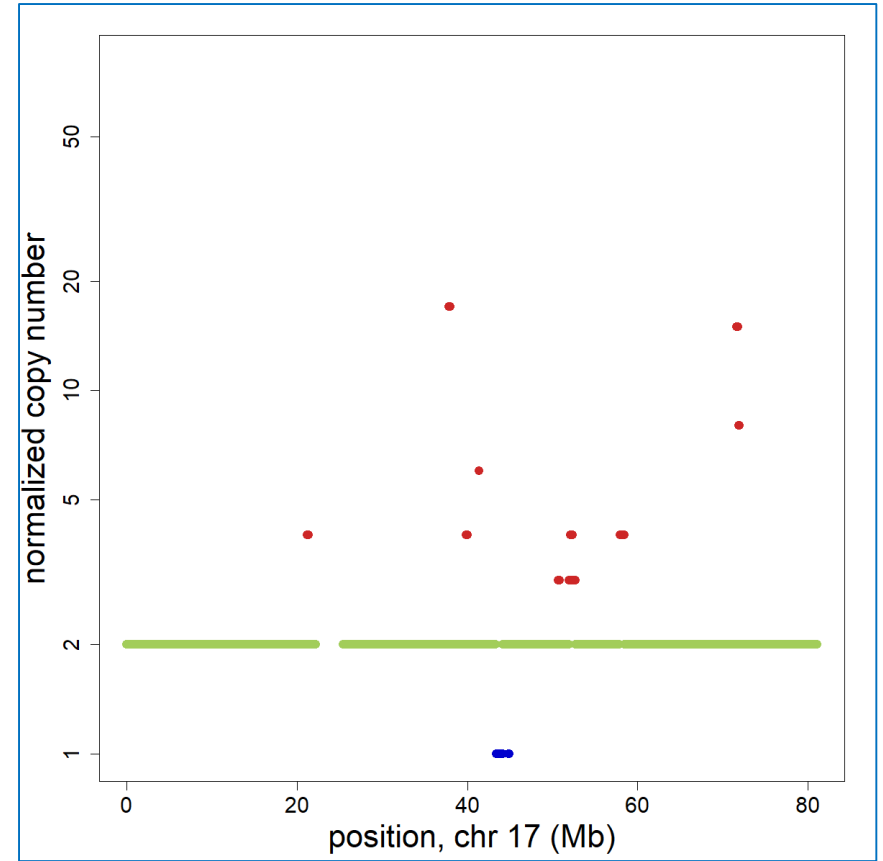

Control-FREEC

p-218

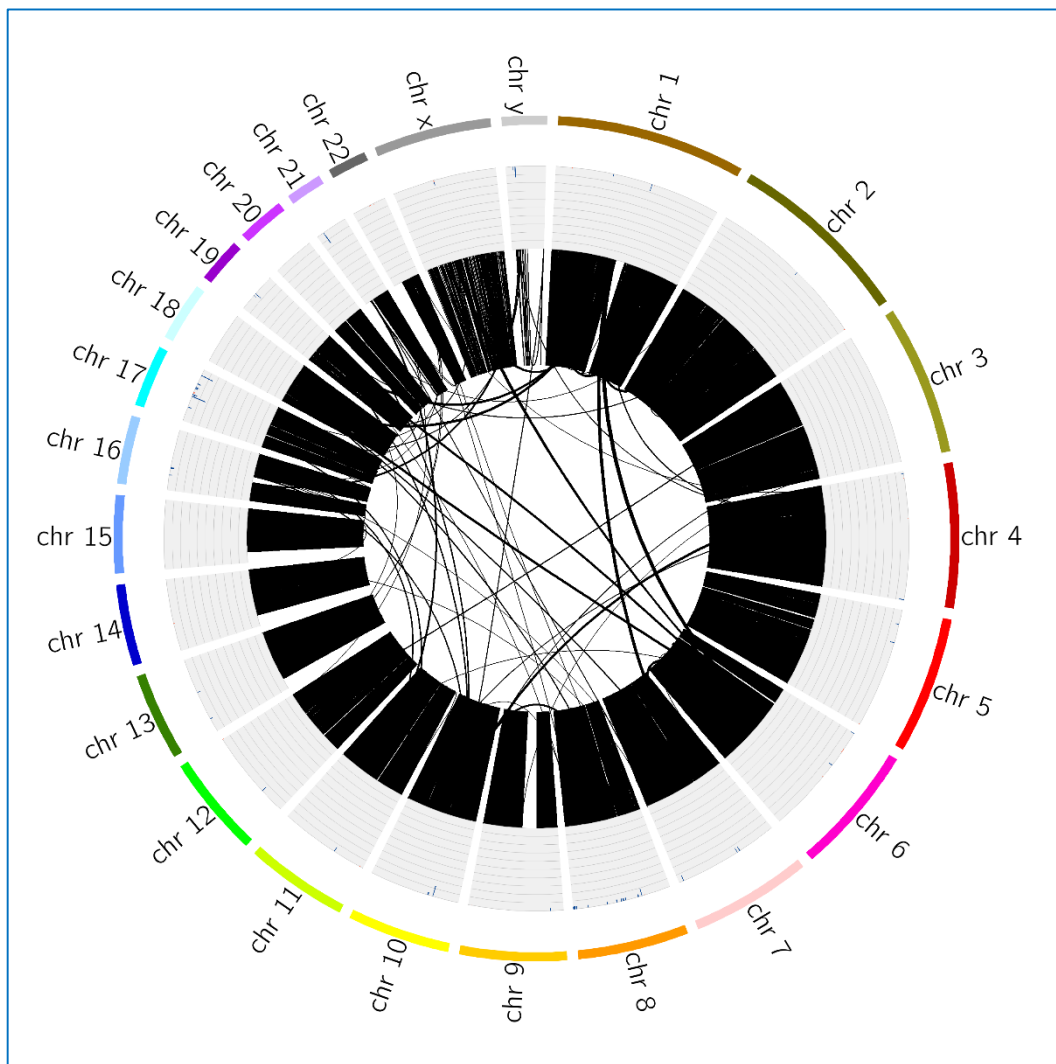

BreakDancer + Control-FREEC

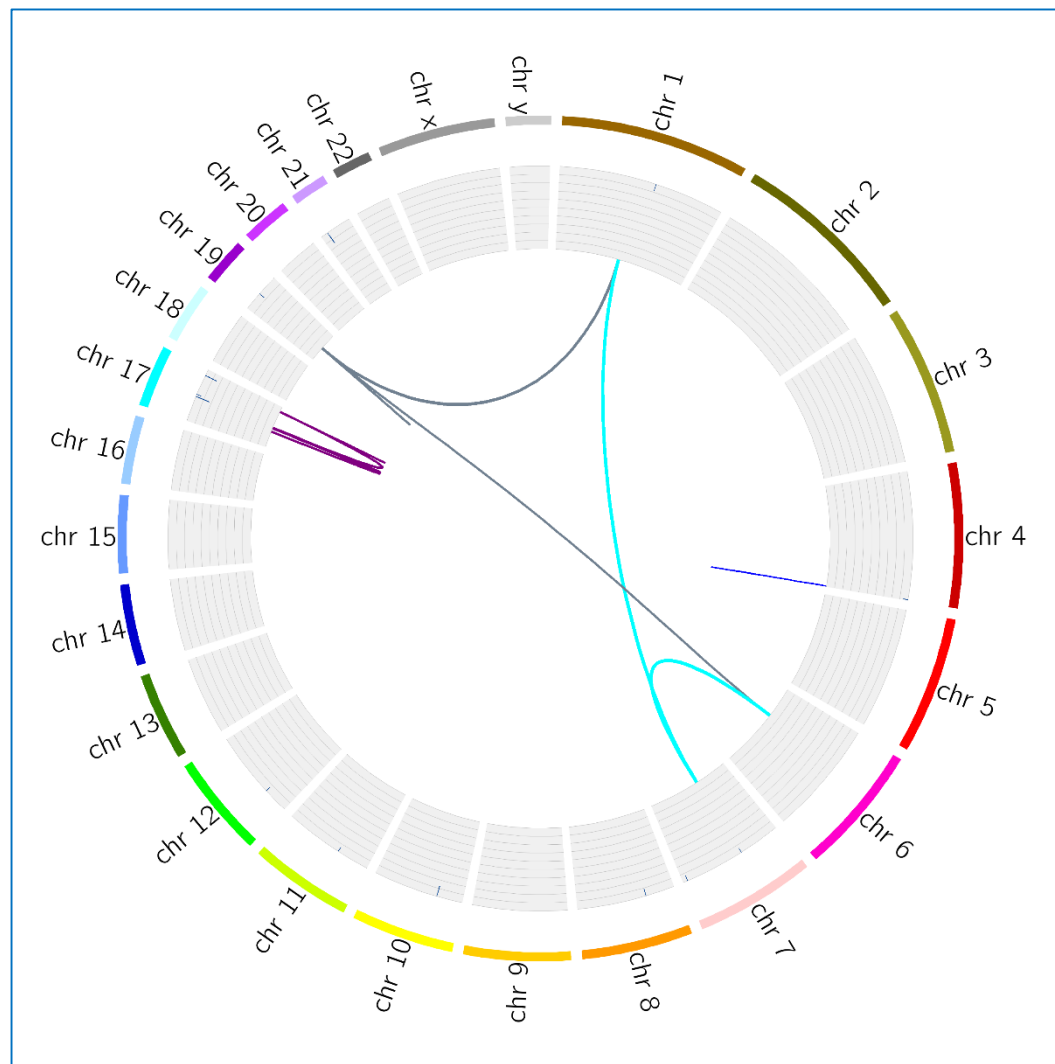

FAST – Whole Genome

p-218

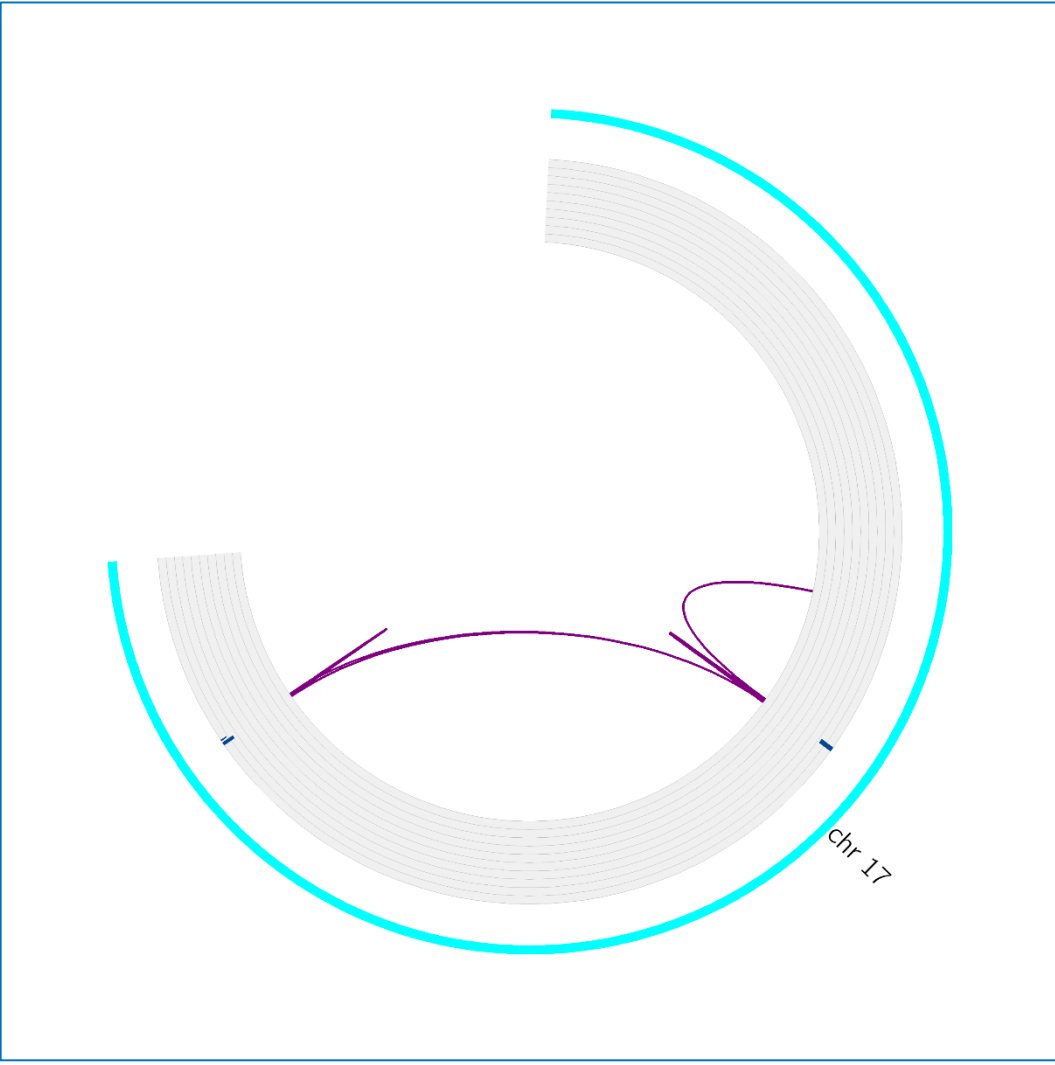

FAST – ERBB2 amplicon

p-6890

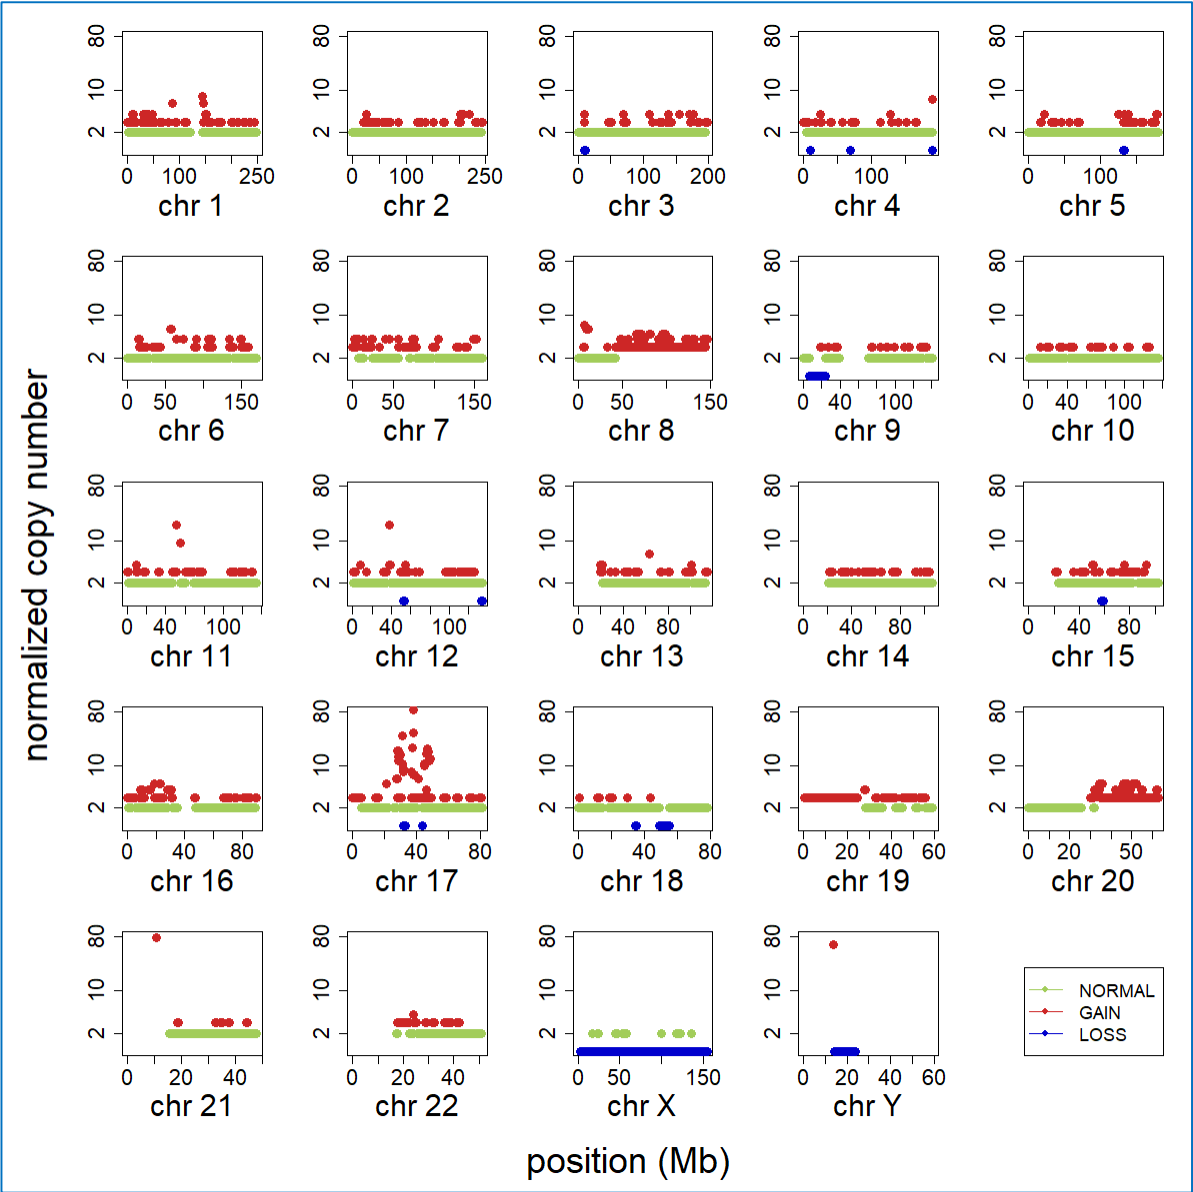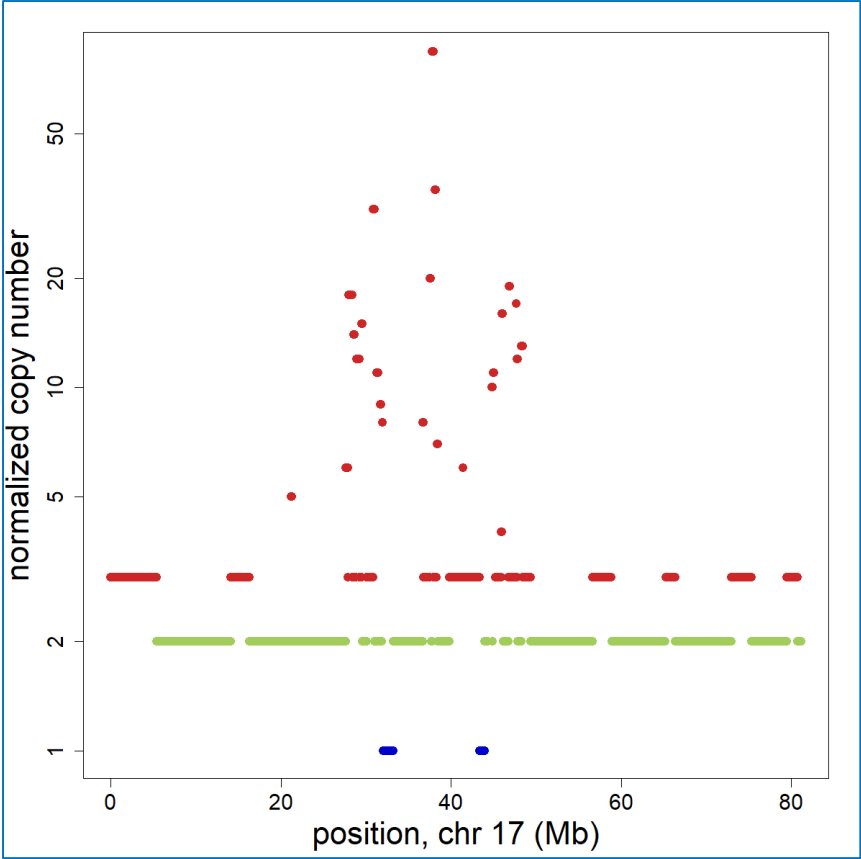

Control-FREEC



p-6890

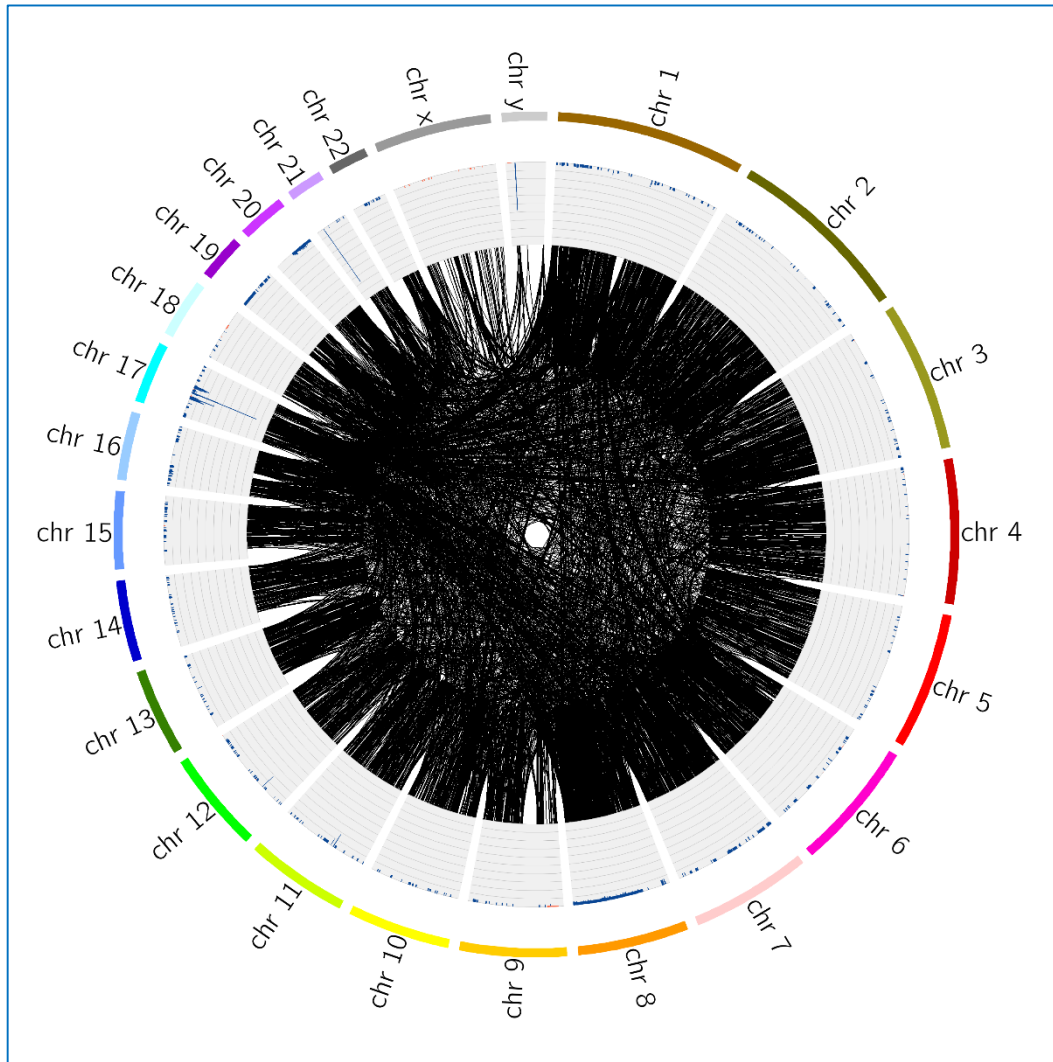

BreakDancer + Control-FREEC

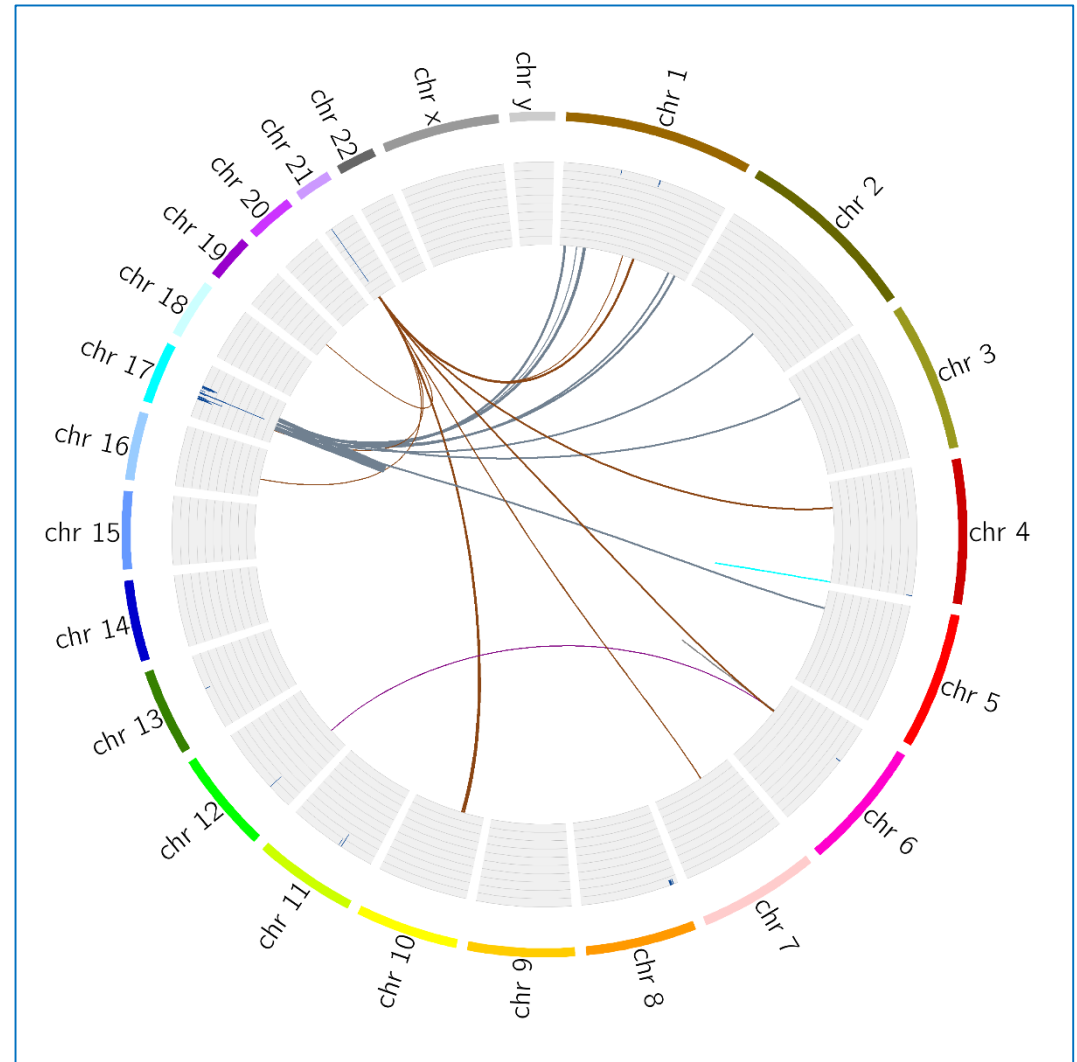

FAST - Whole Genome

p-6890

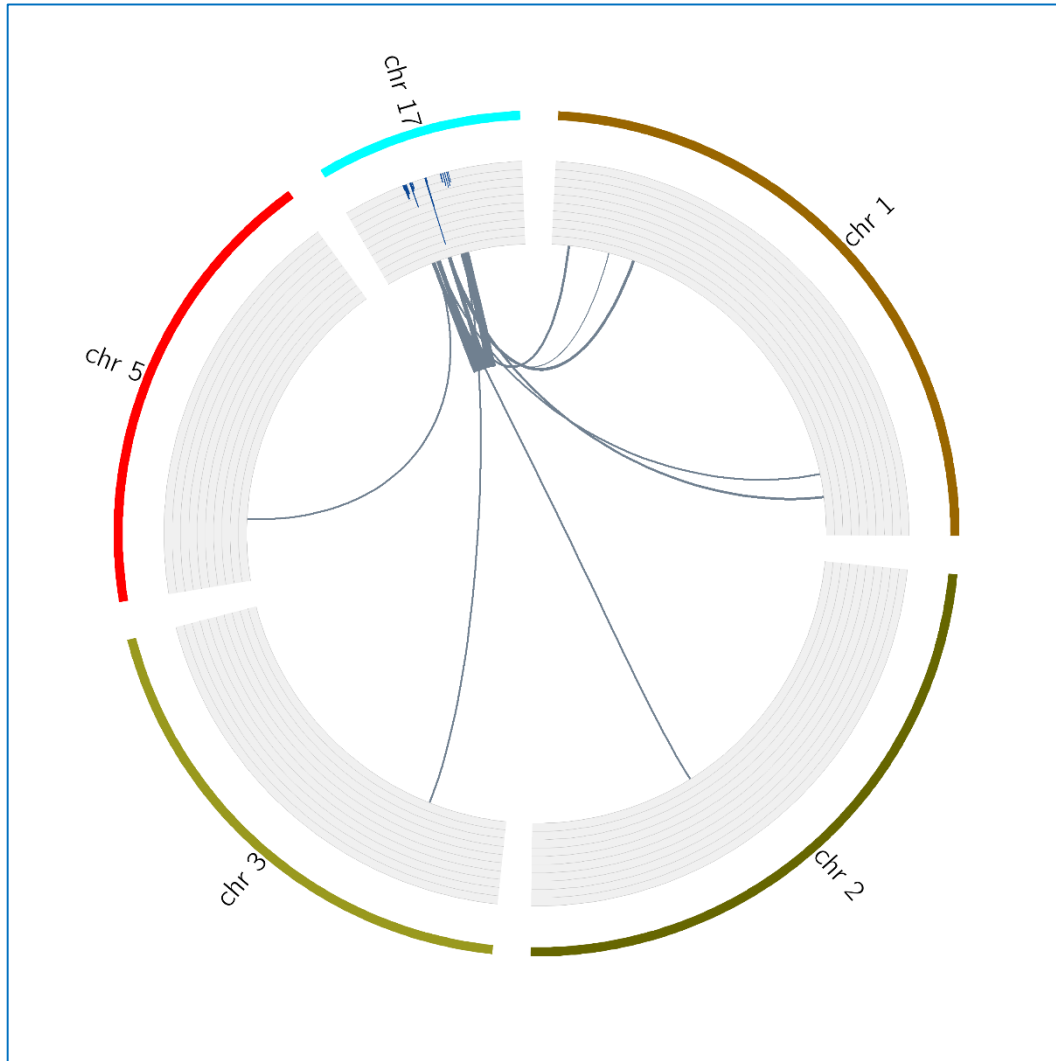

FAST – ERBB2 amplicon

p-8191

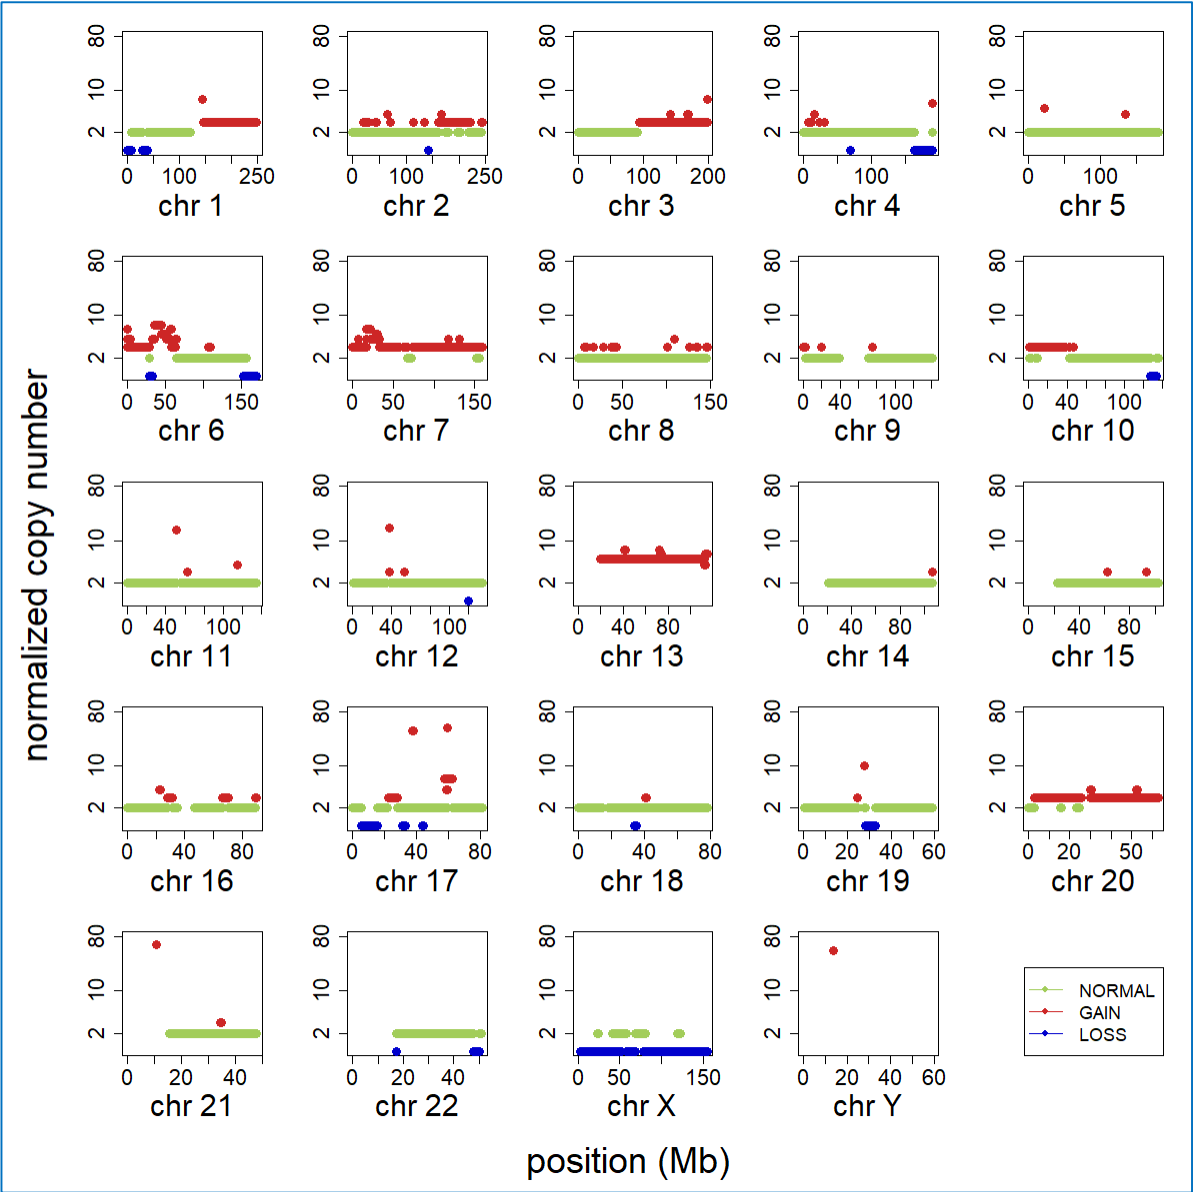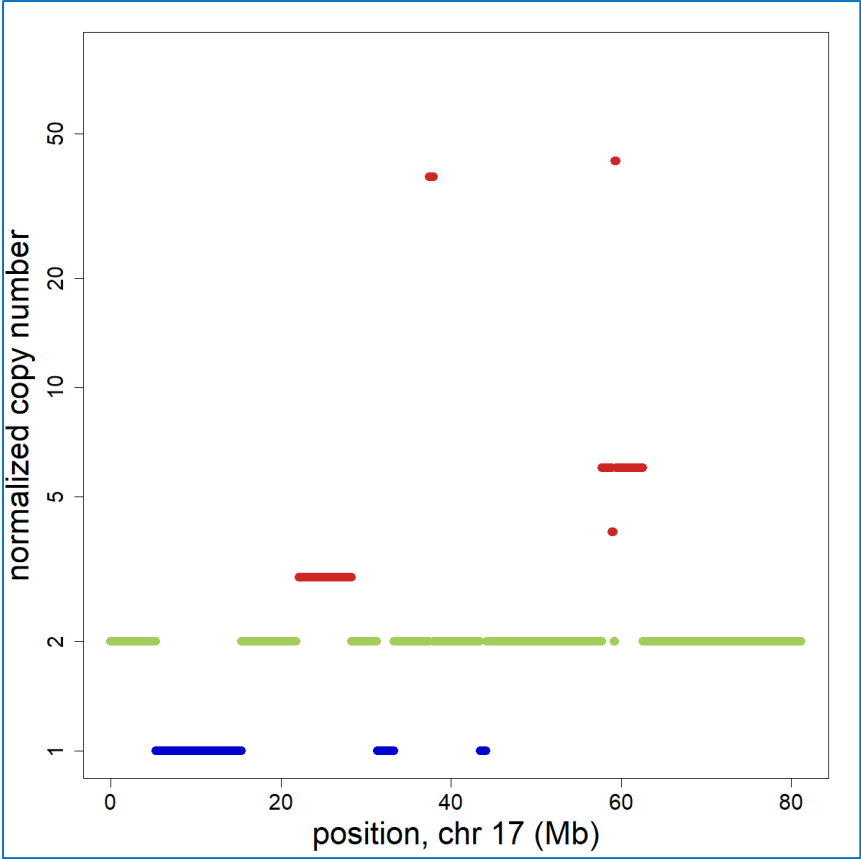

Control-FREEC

p-8191

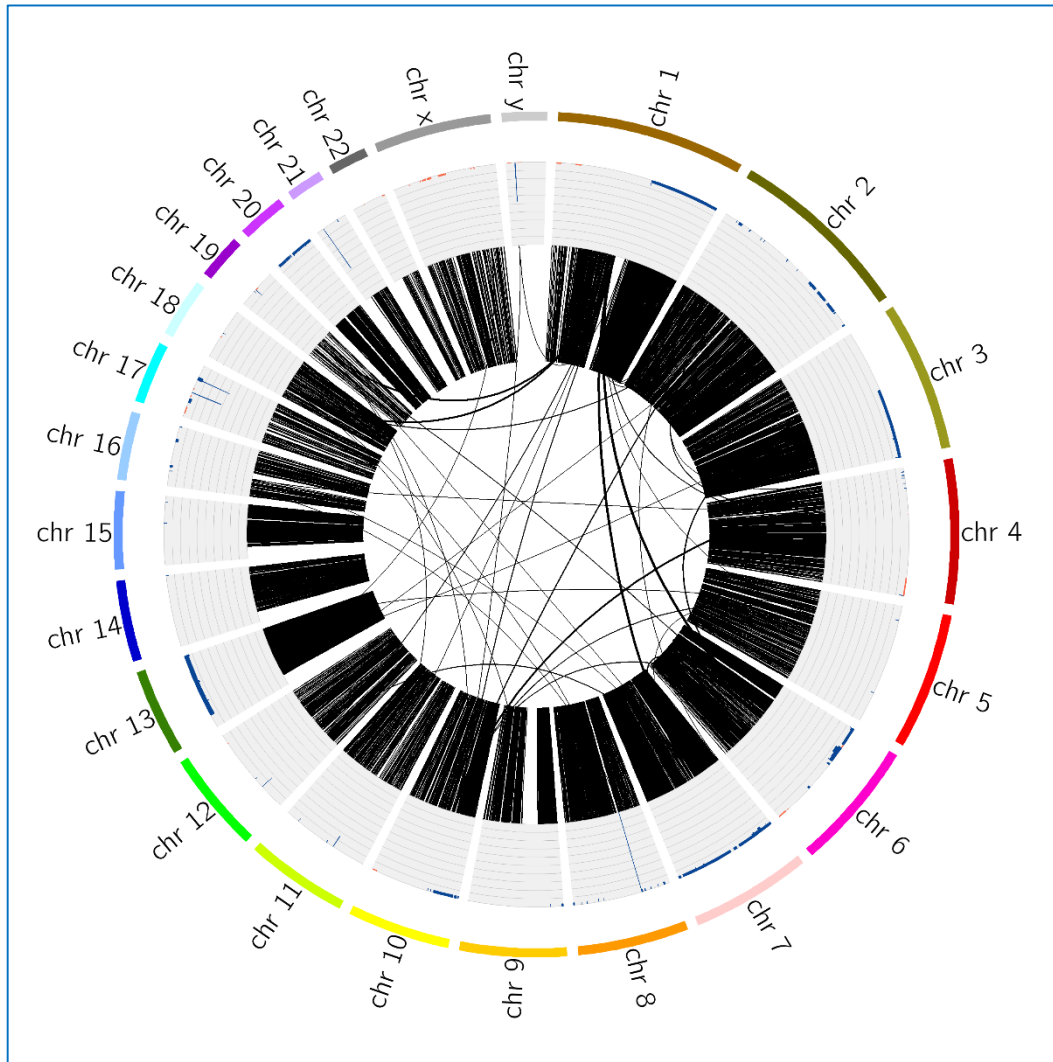

BreakDancer + Control-FREEC

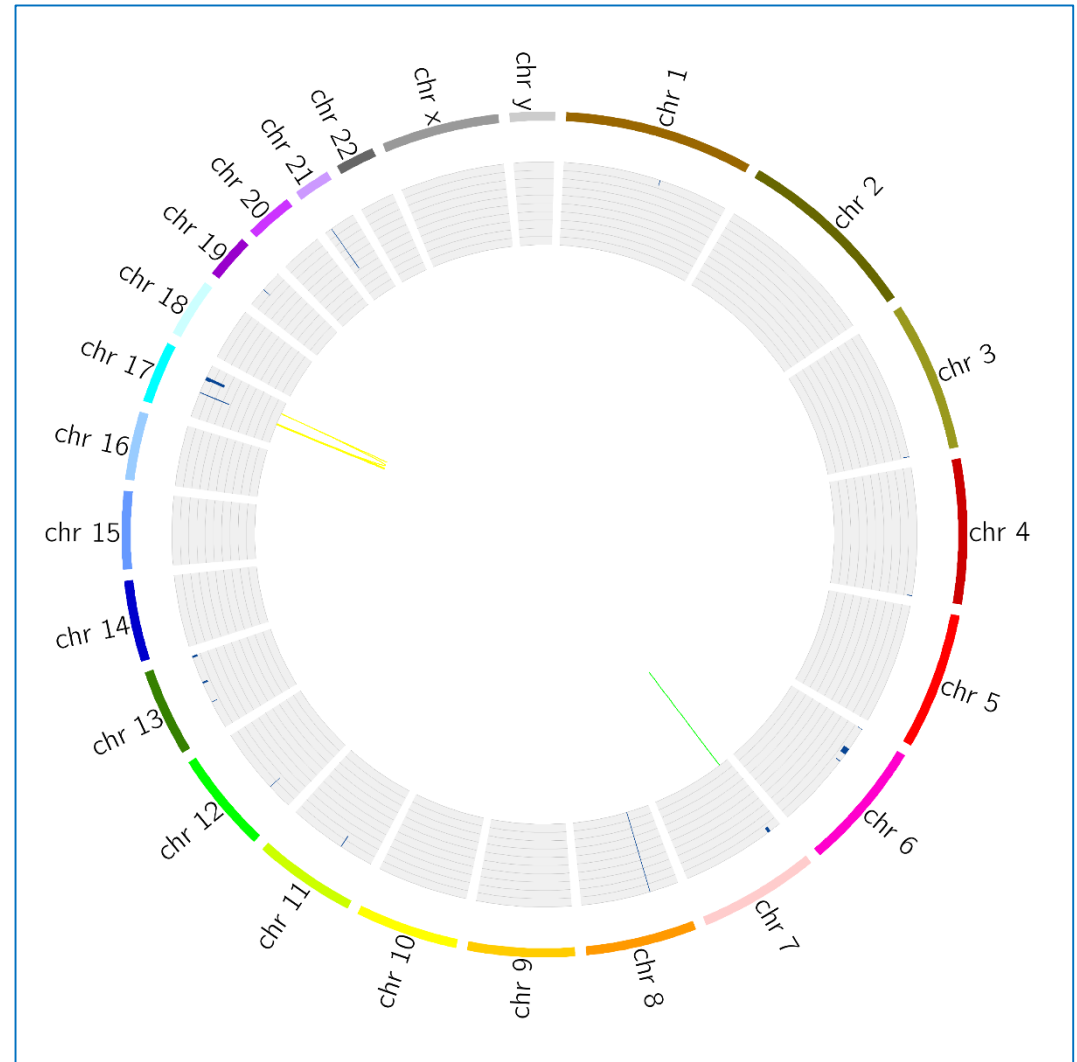

FAST - Whole Genome

p-8191

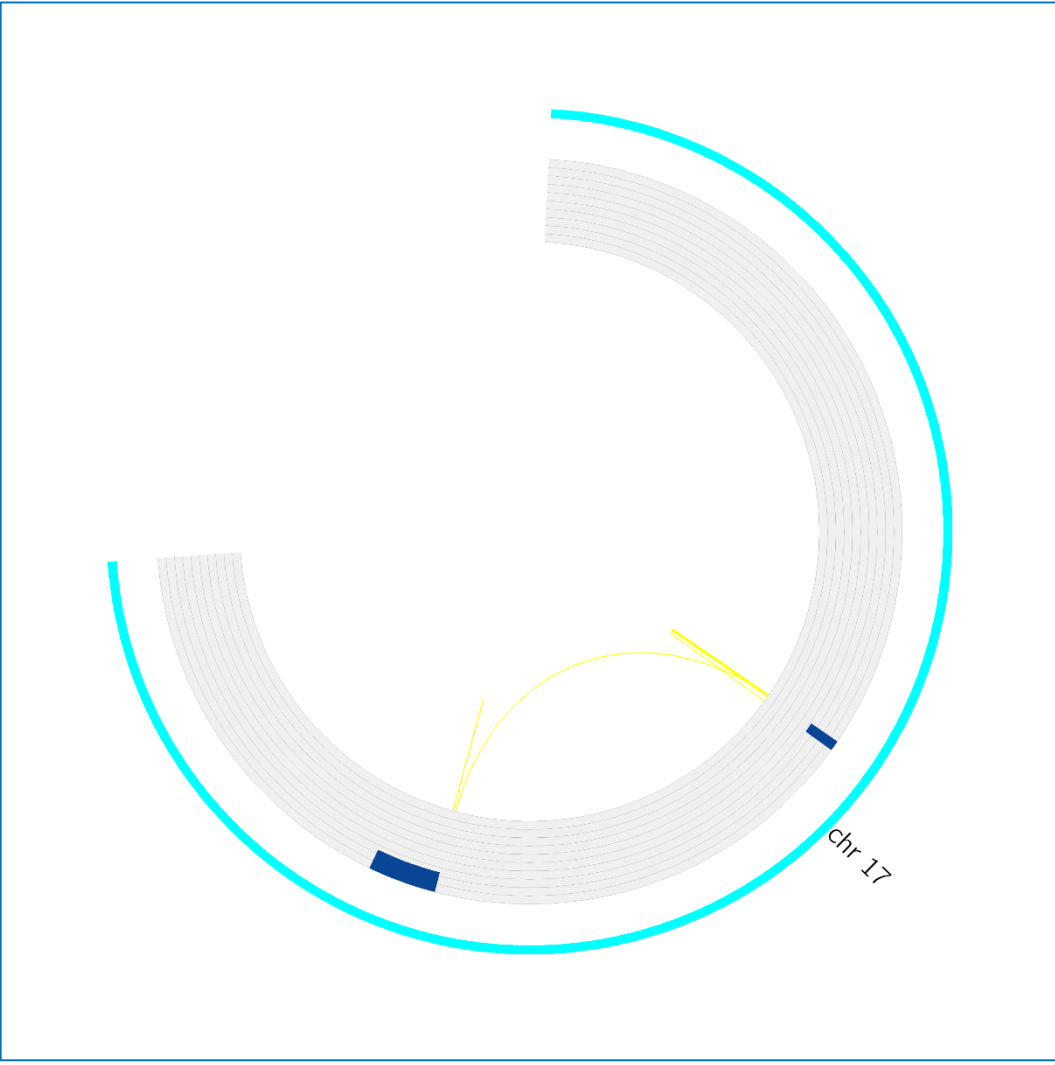

FAST – ERBB2 amplicon

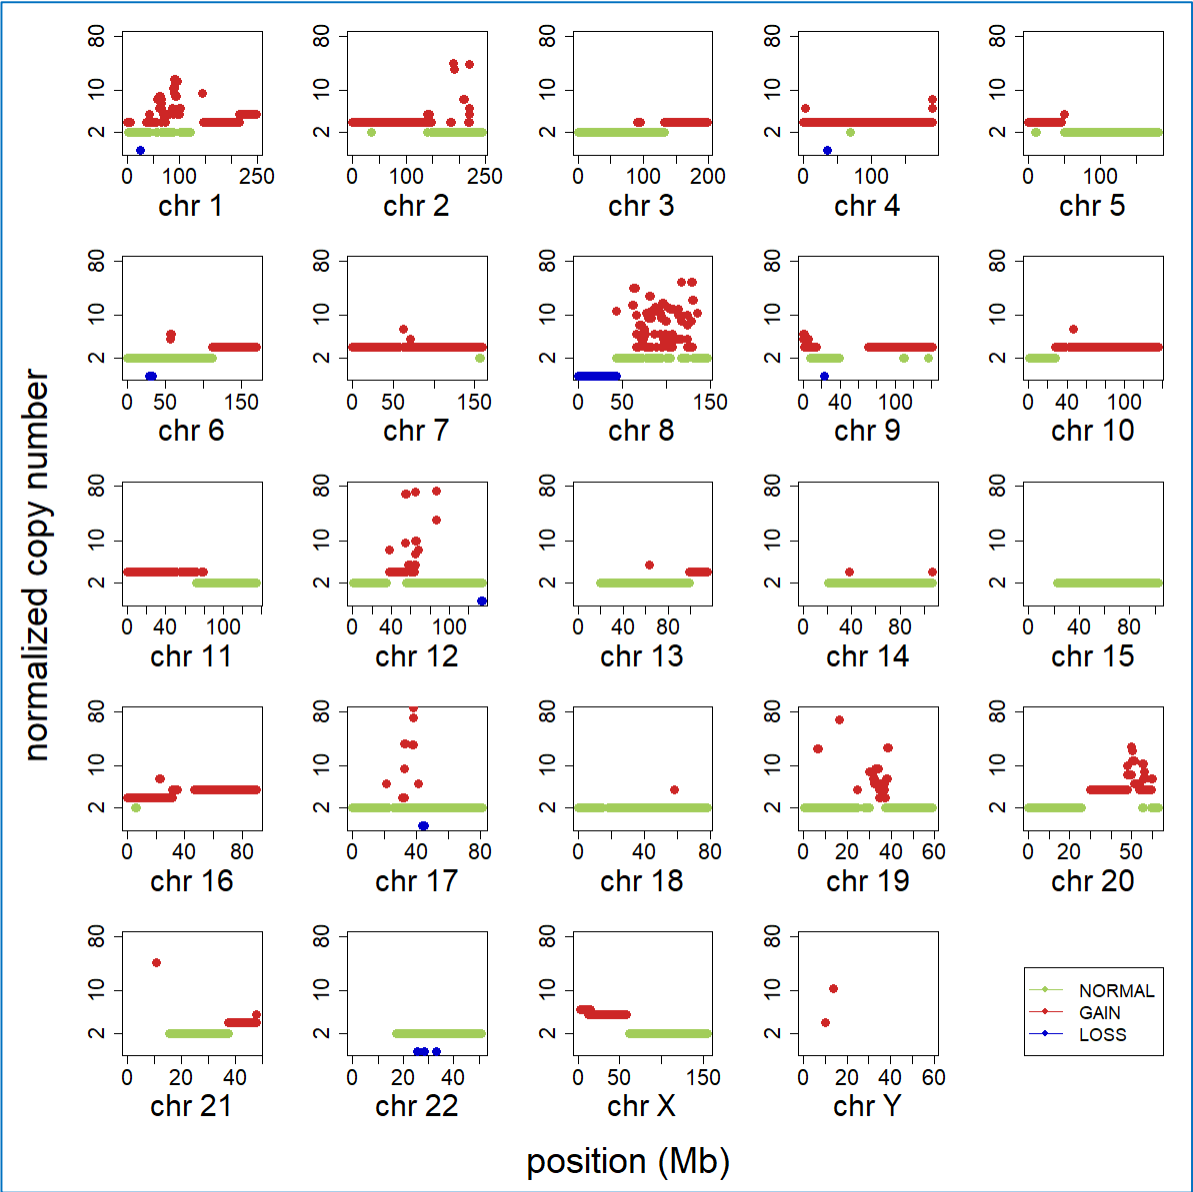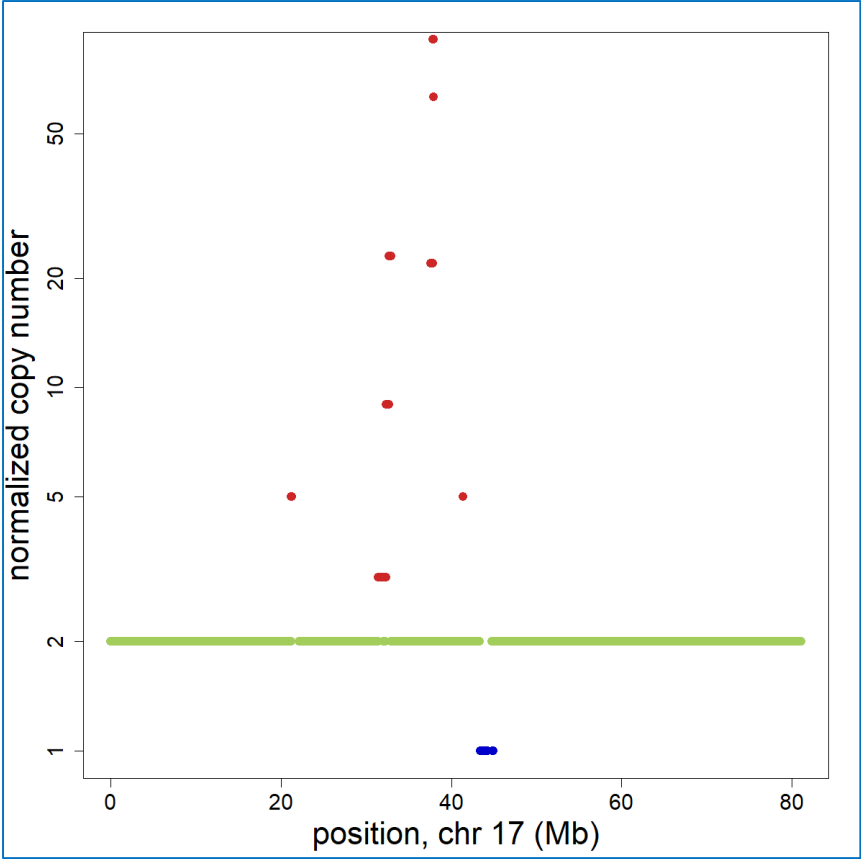

Control-FREEC

20983

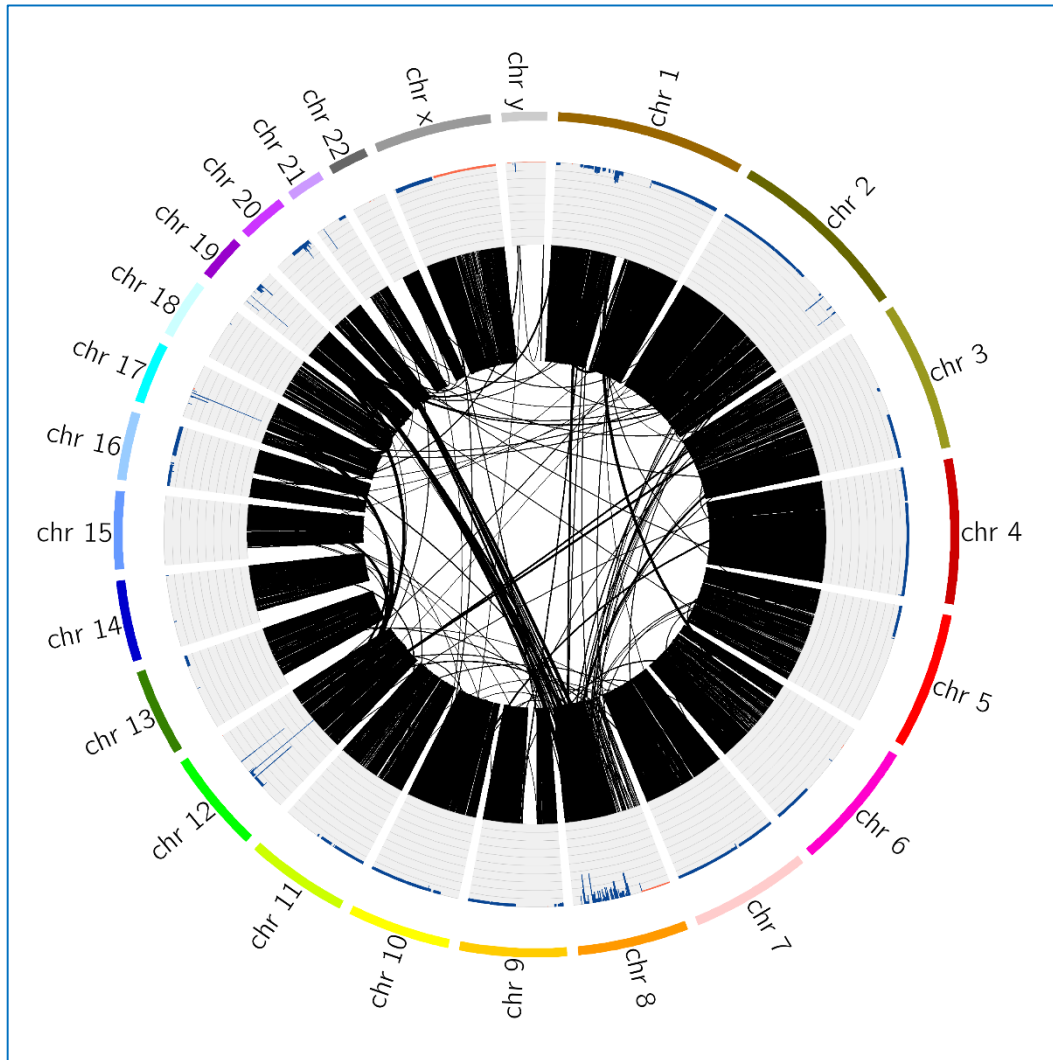

BreakDancer + Control-FREEC

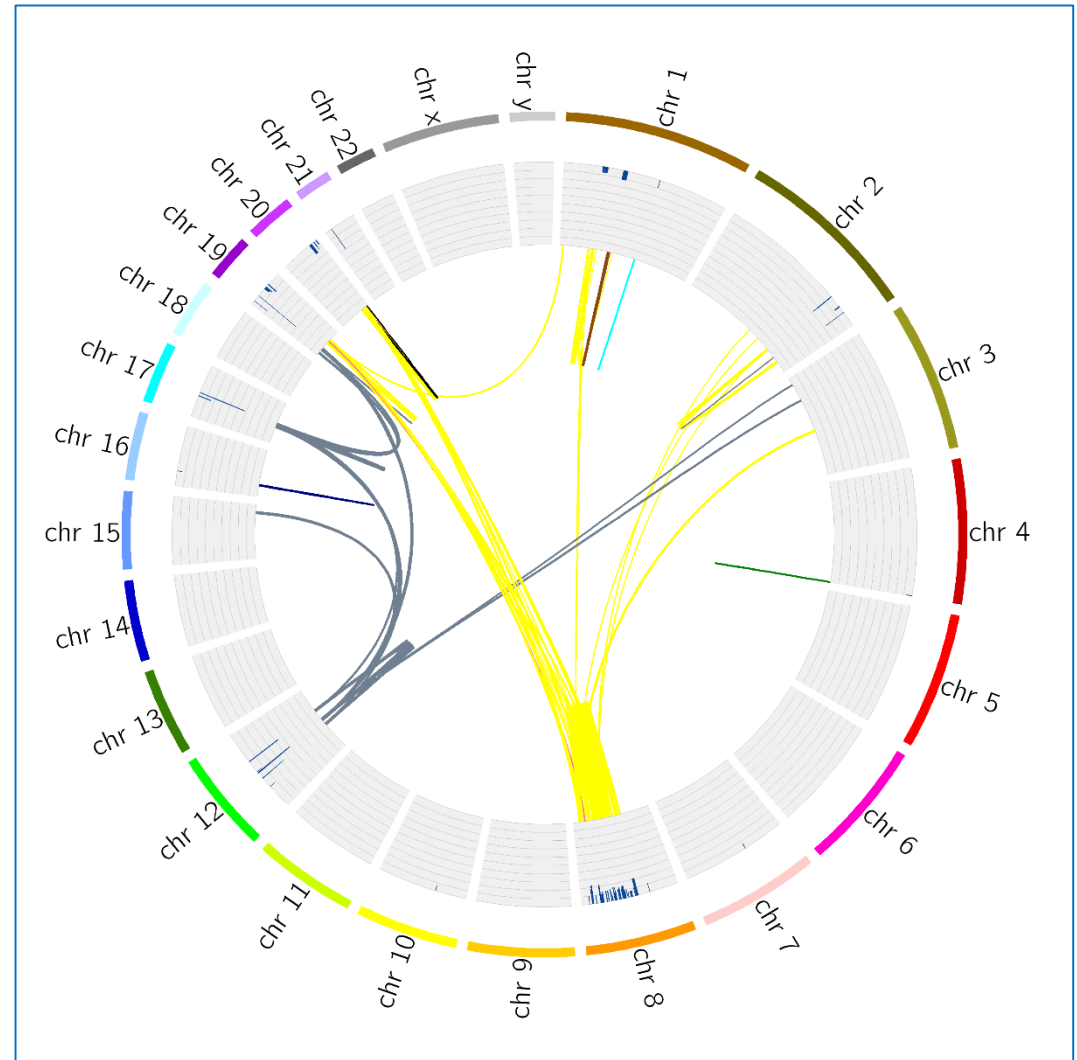

FAST – Whole Genome

20983

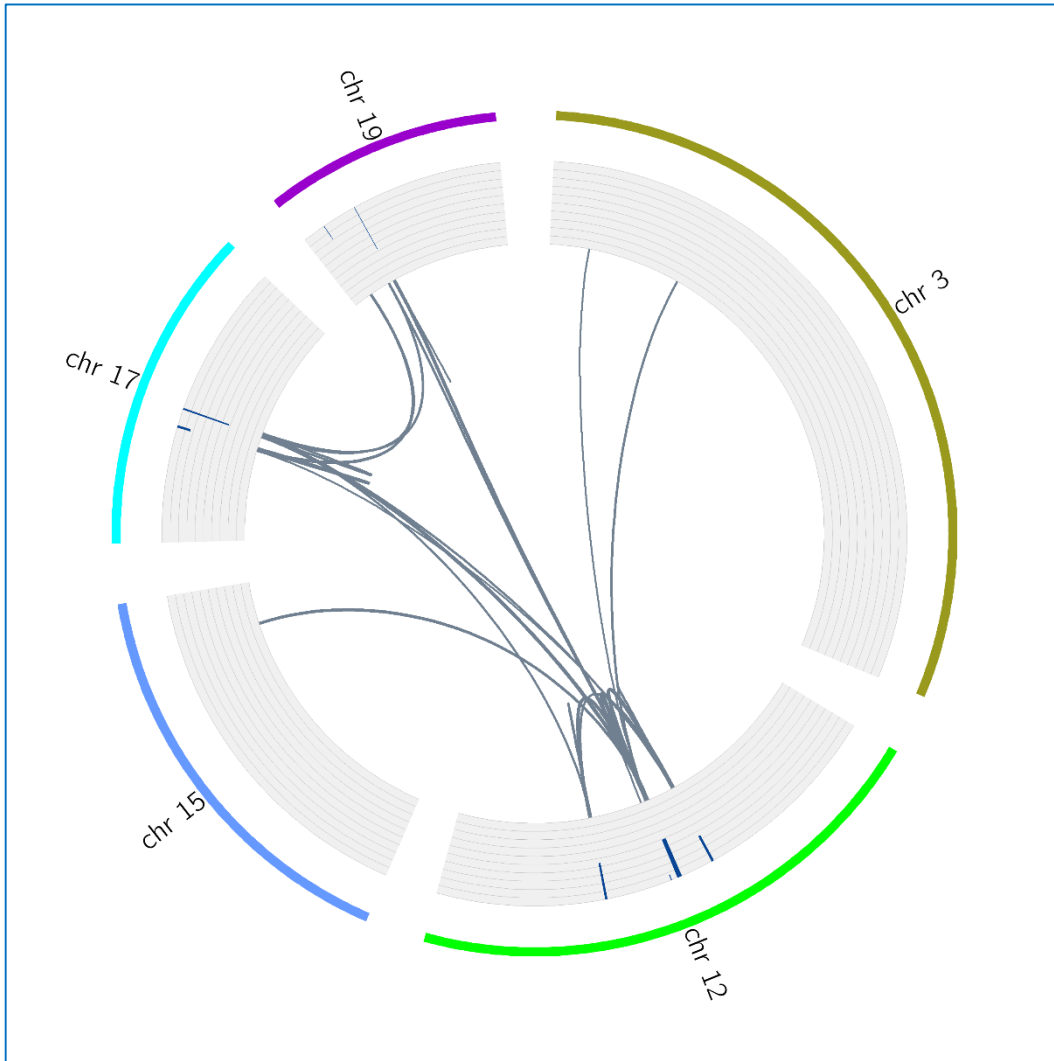

FAST – ERBB2 amplicon



80990

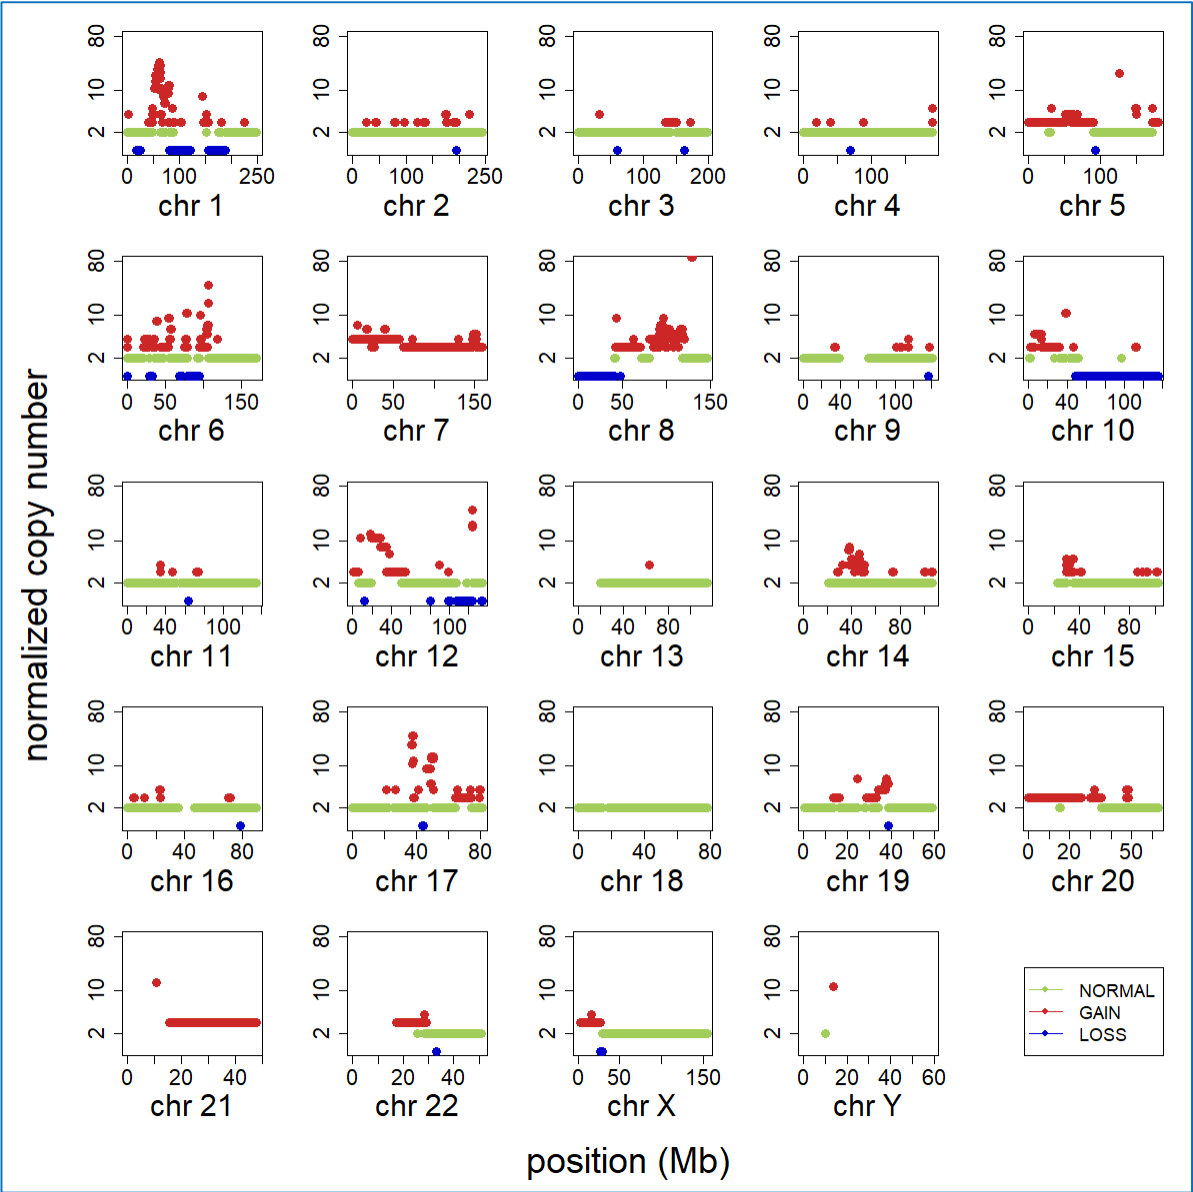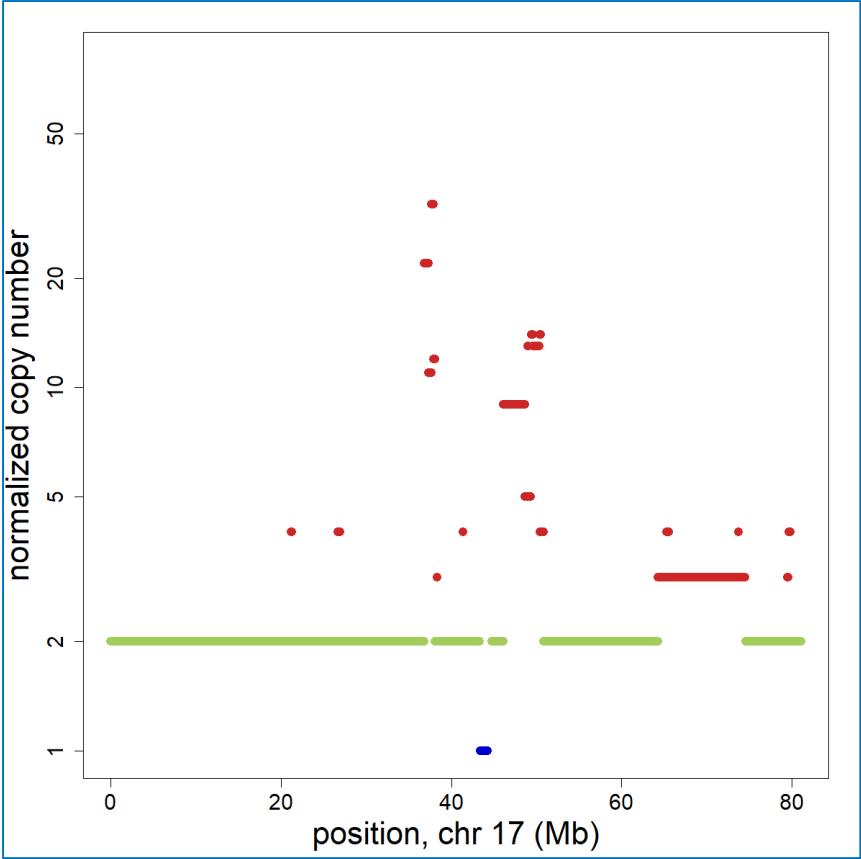

Control-FREEC

80990

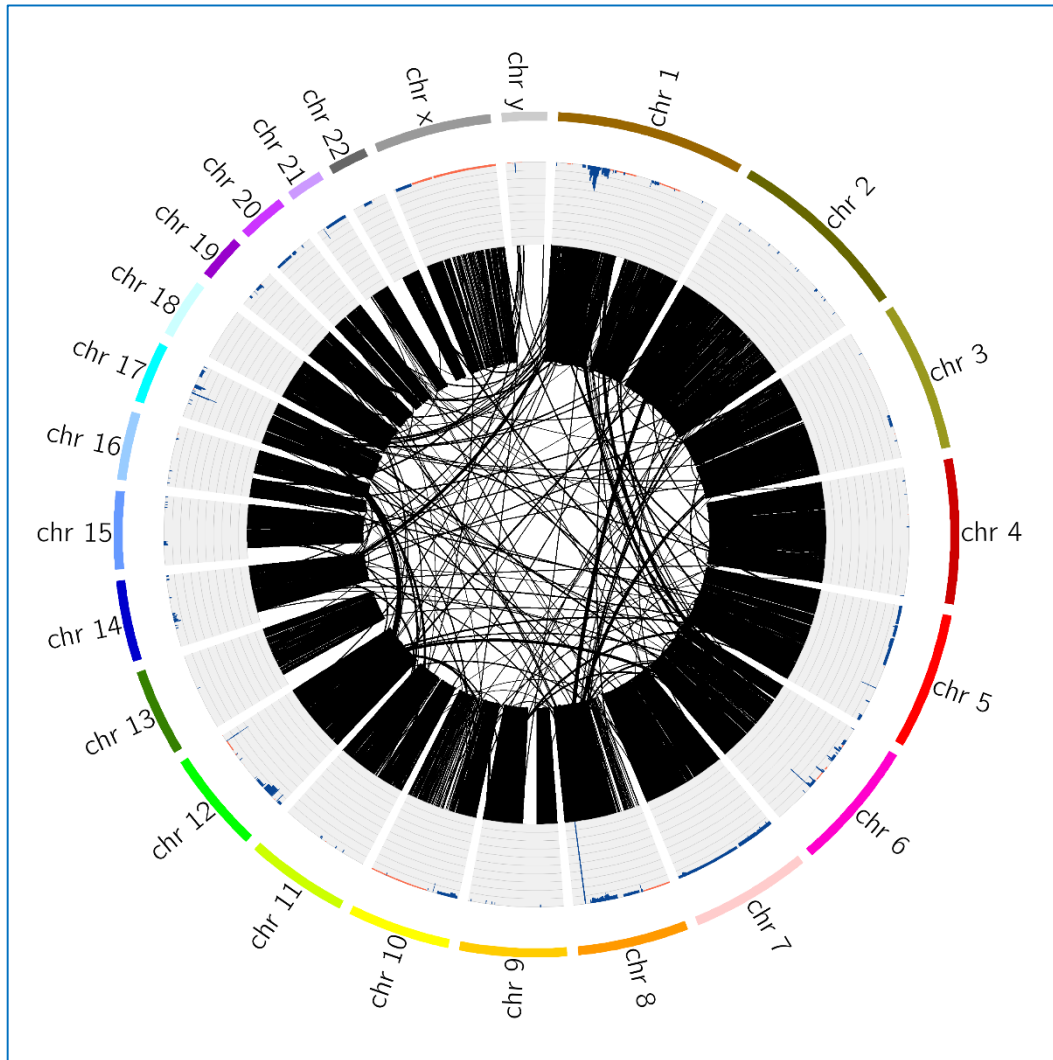

BreakDancer + Control-FREEC

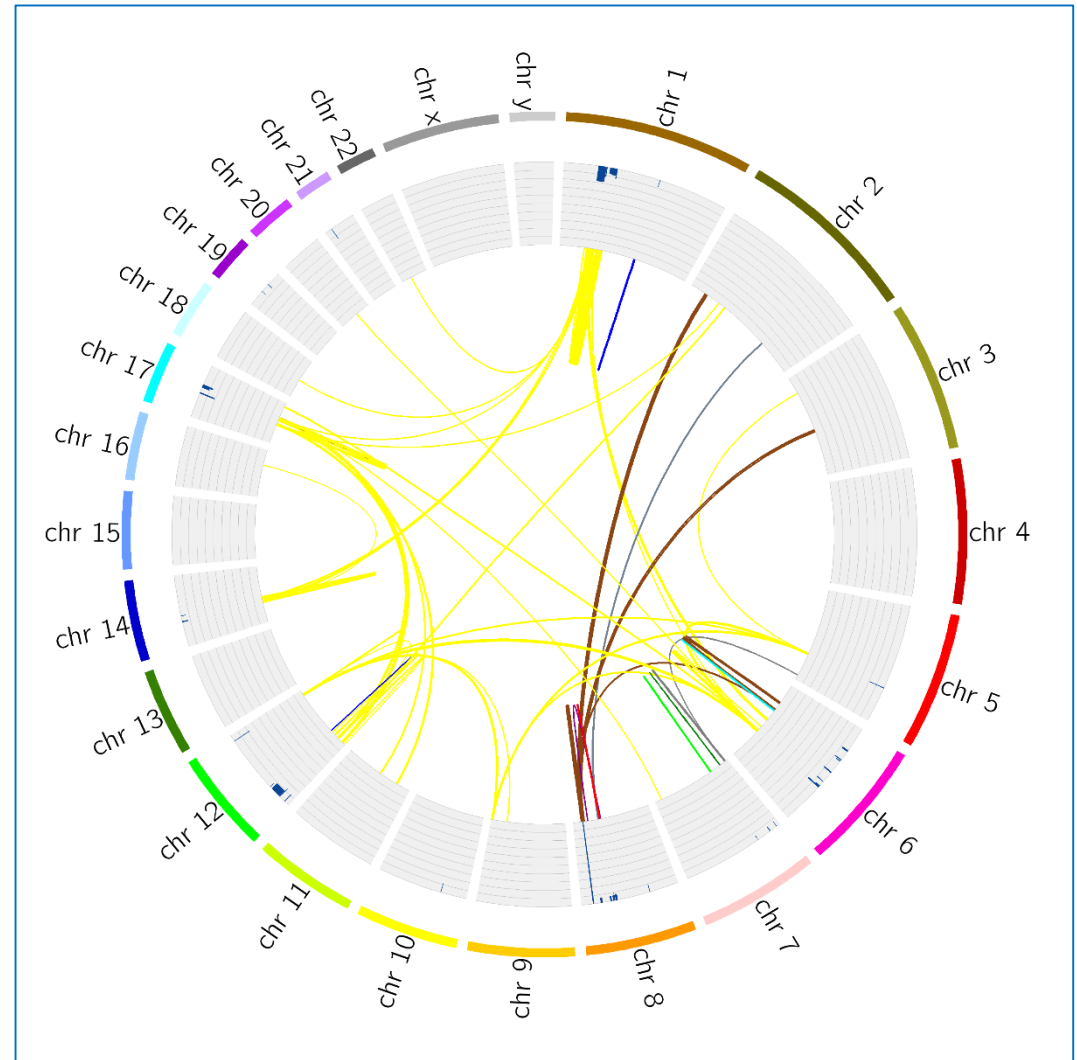

FAST - Whole Genome

80990

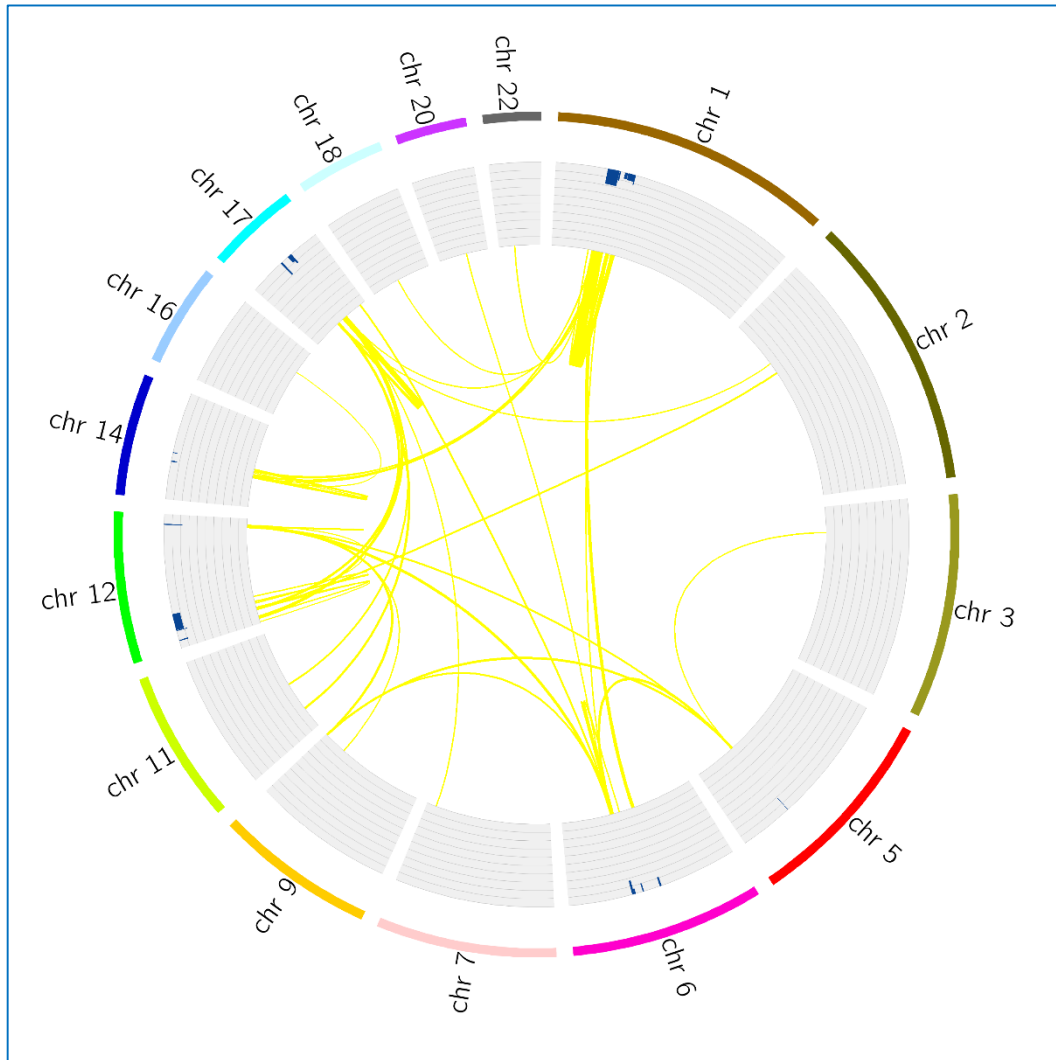

FAST – ERBB2 amplicon

# BT474

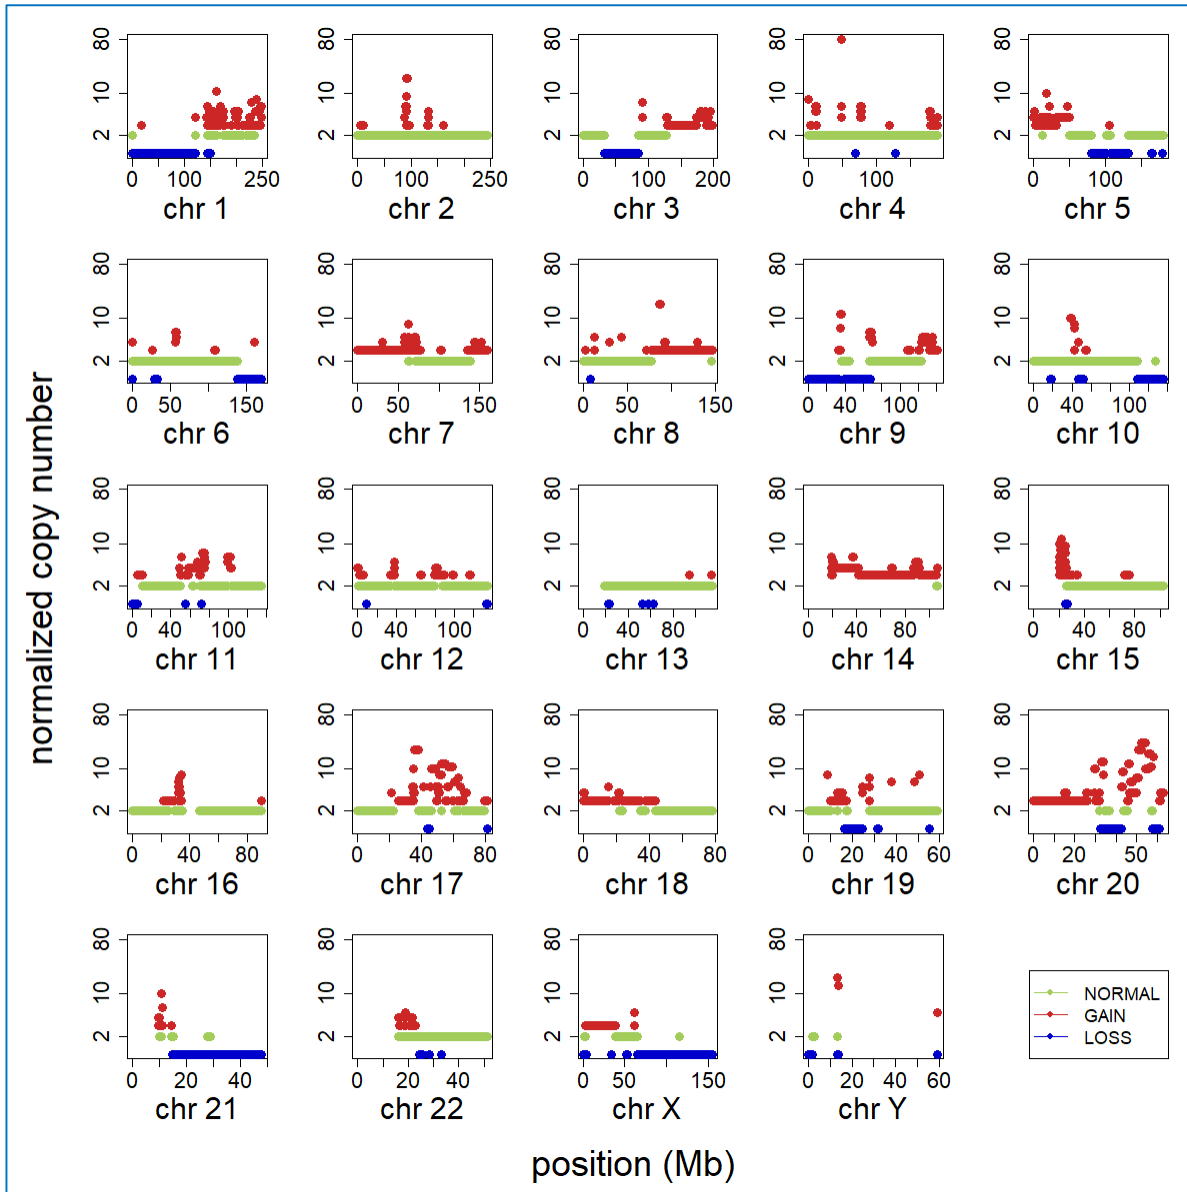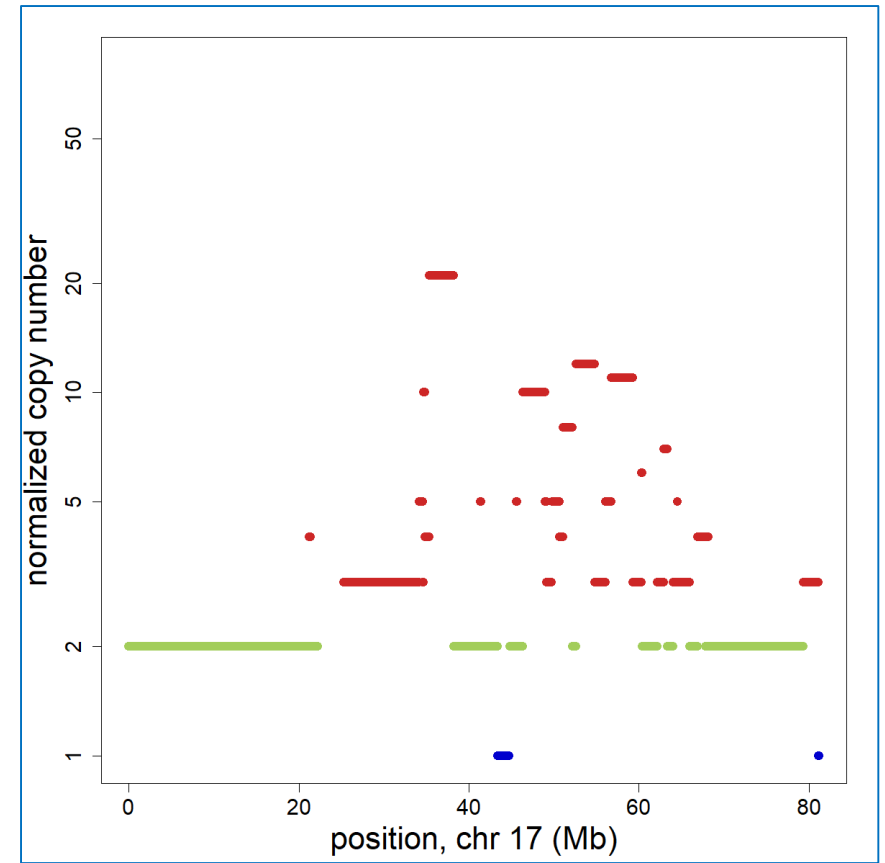

Control-FREEC

BT474

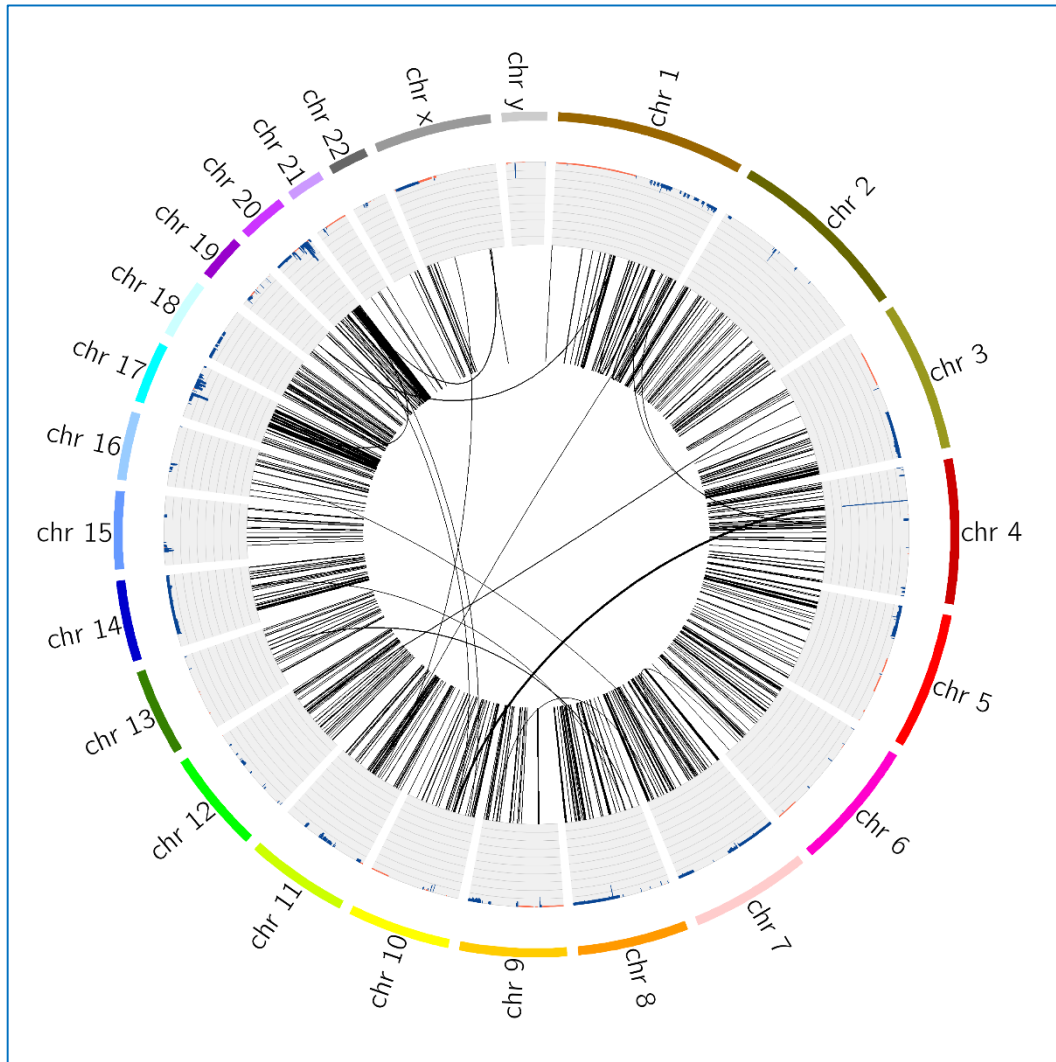

BreakDancer + Control-FREEC

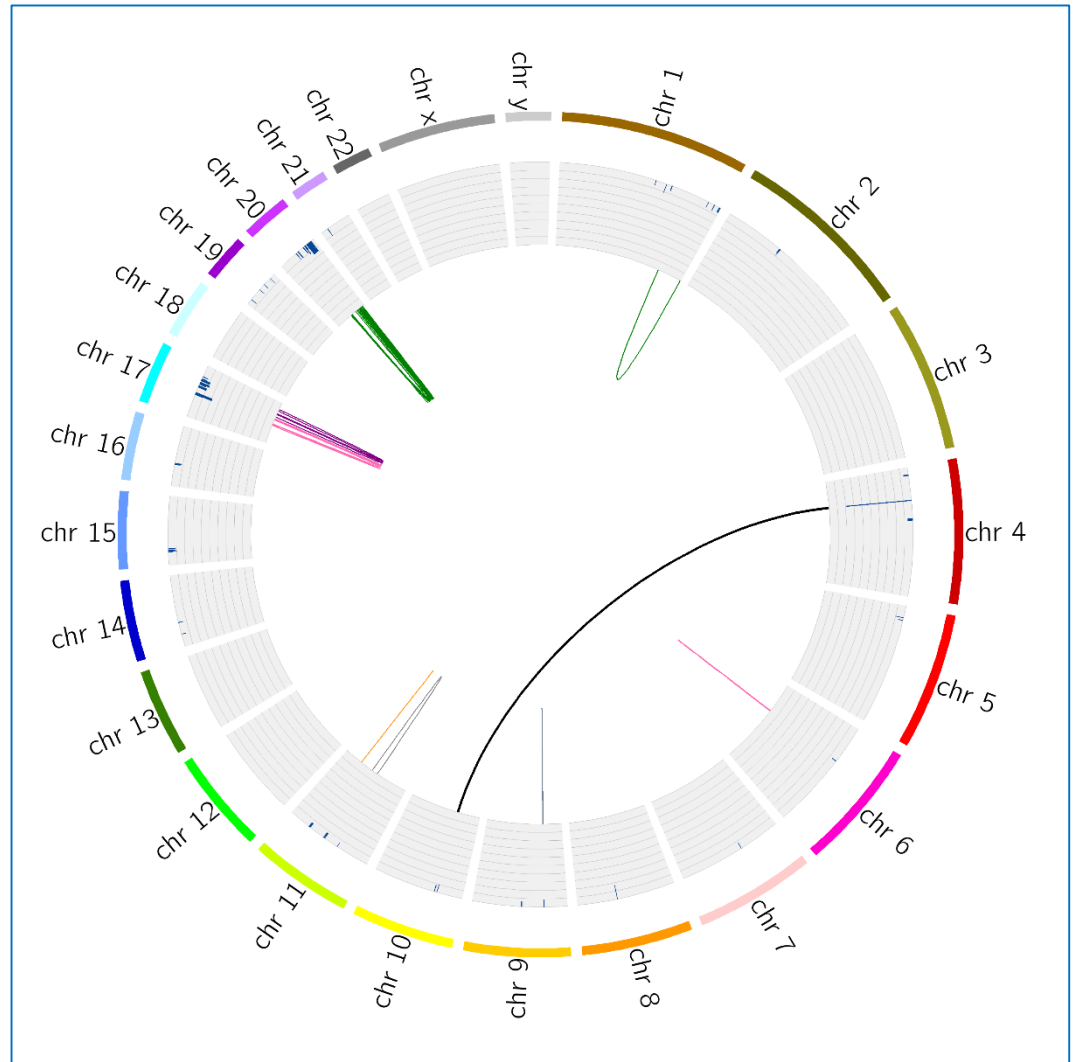

FAST - Whole Genome

BT474

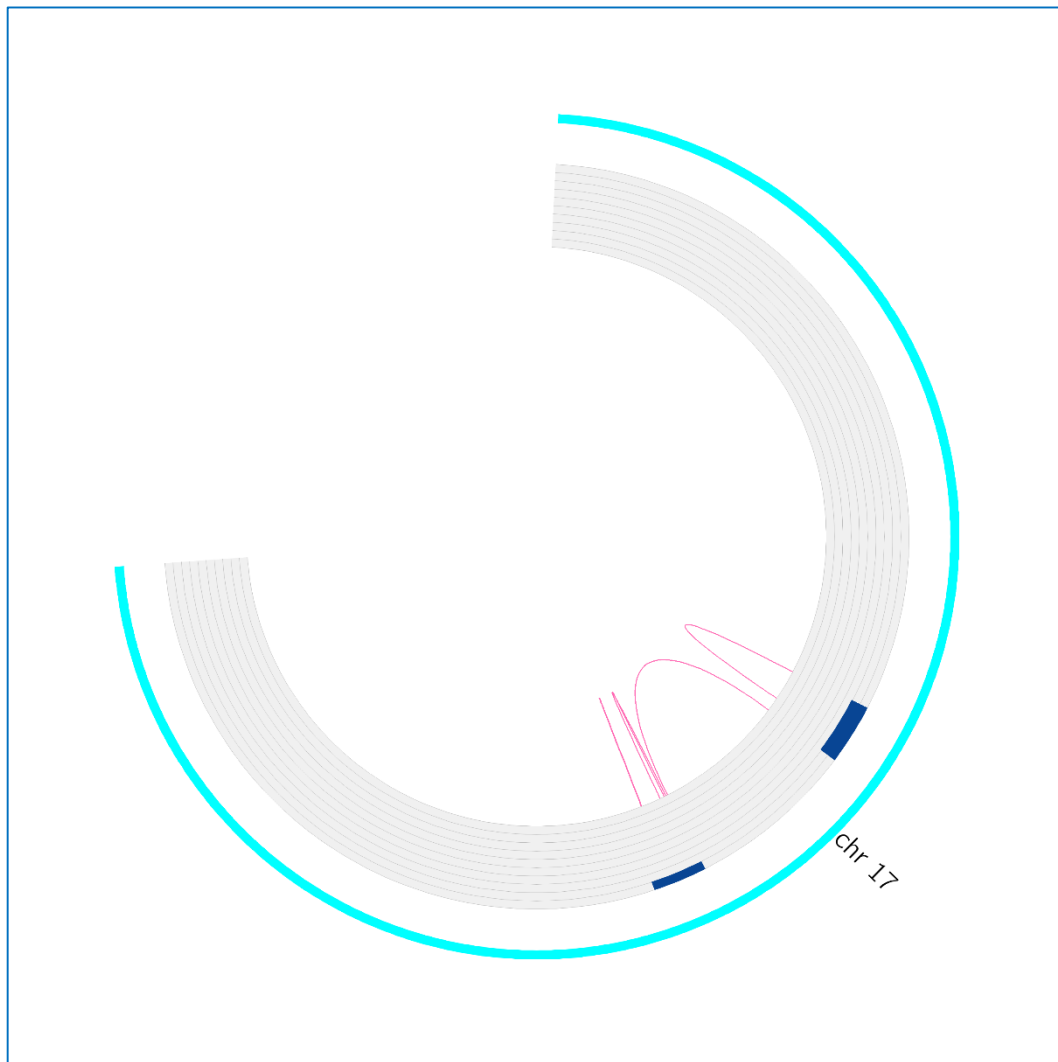

FAST – ERBB2 amplicon

# HCC1954

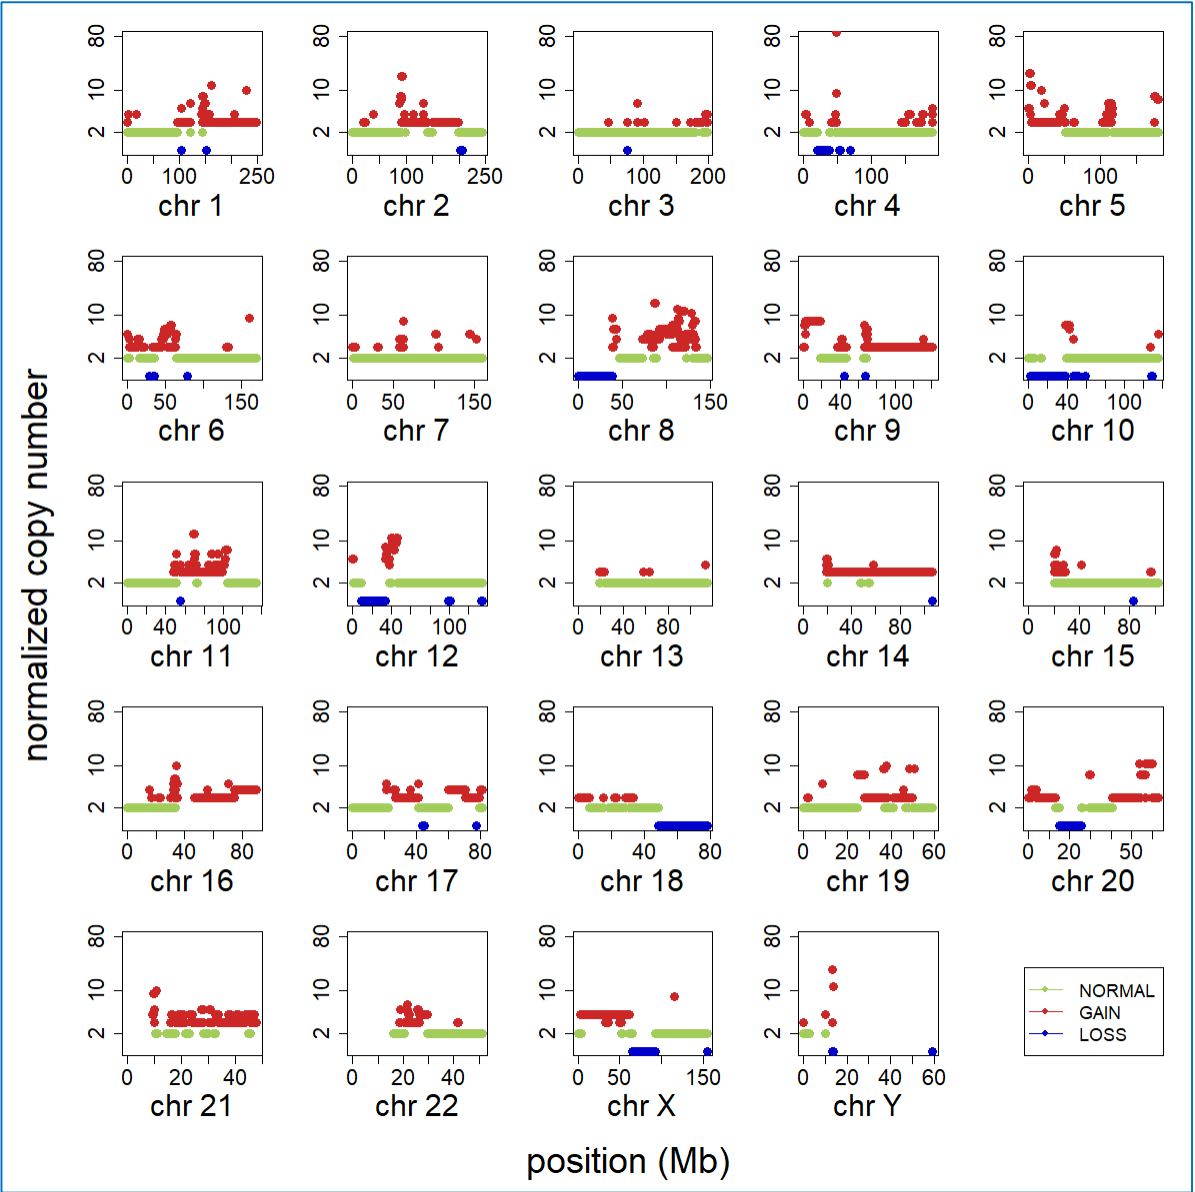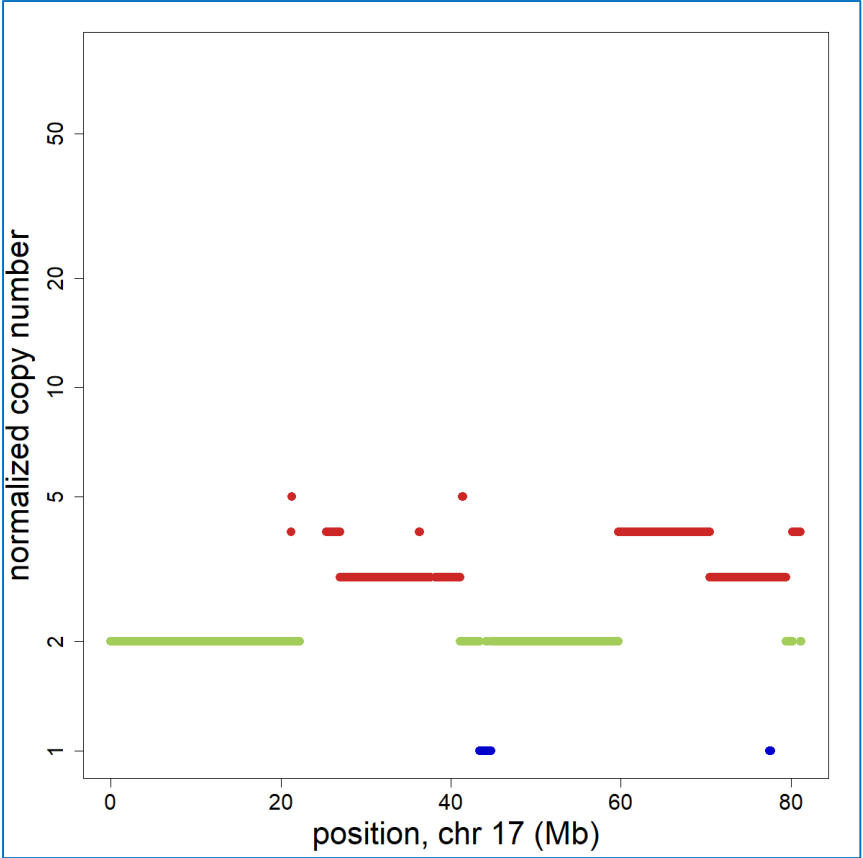

Control-FREEC

# HCC1954

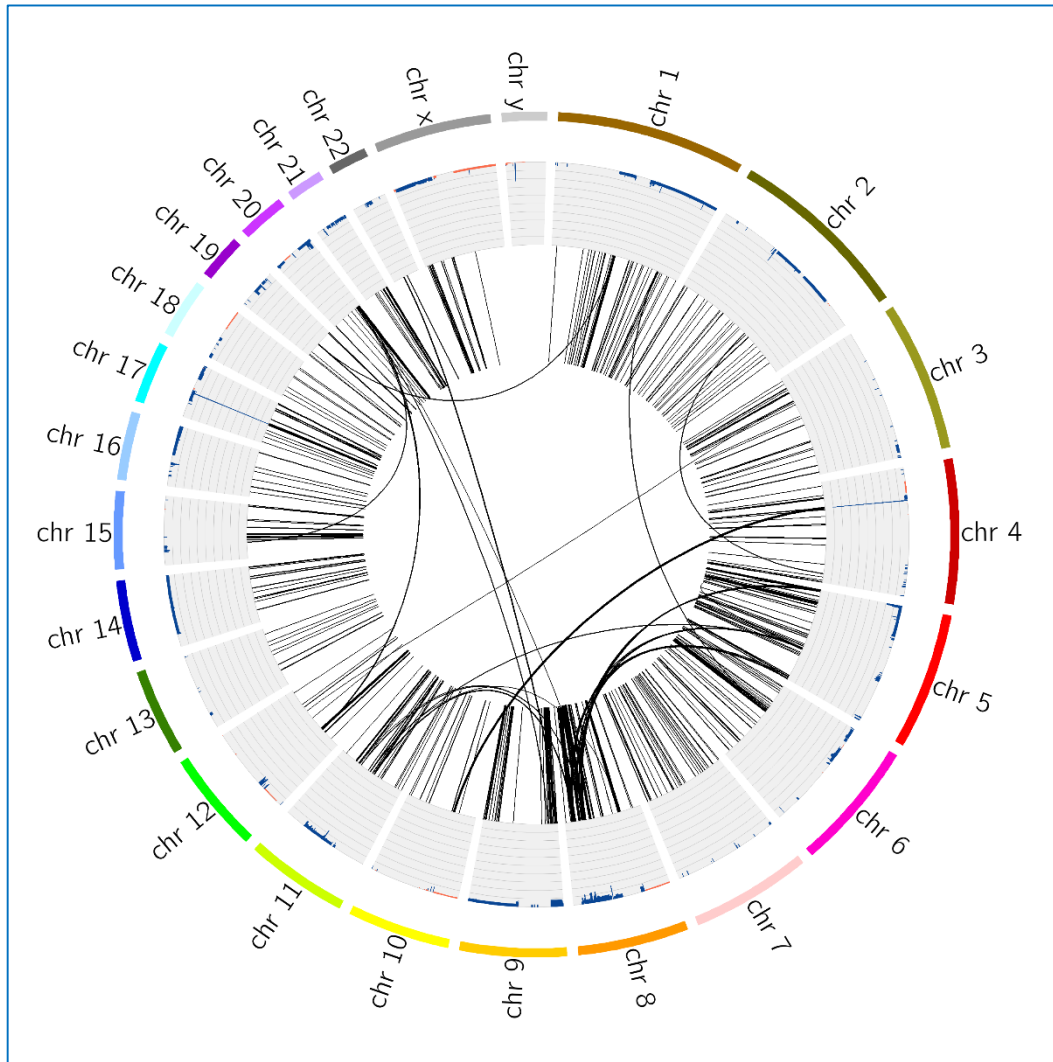

BreakDancer + Control-FREEC

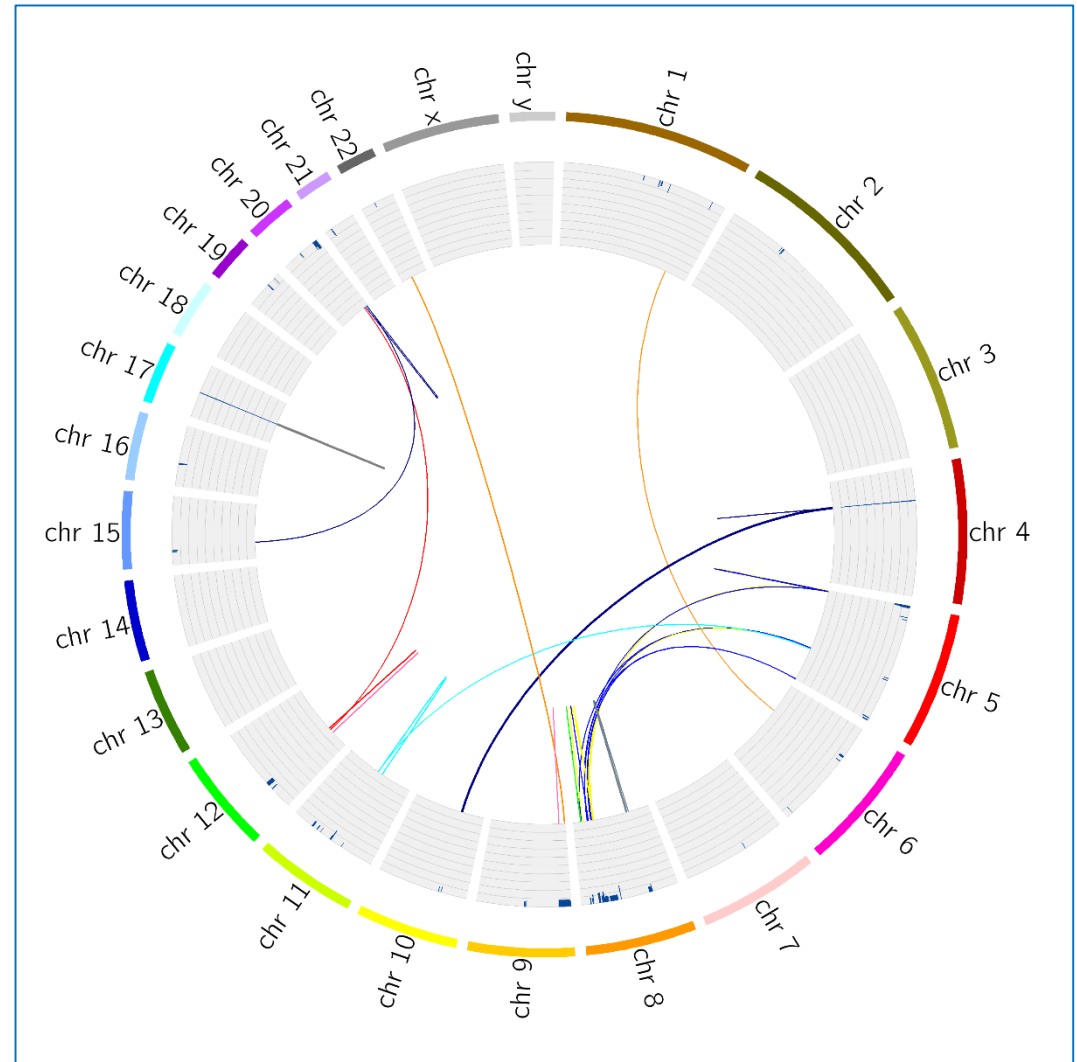

FAST - Whole Genome



HCC1954

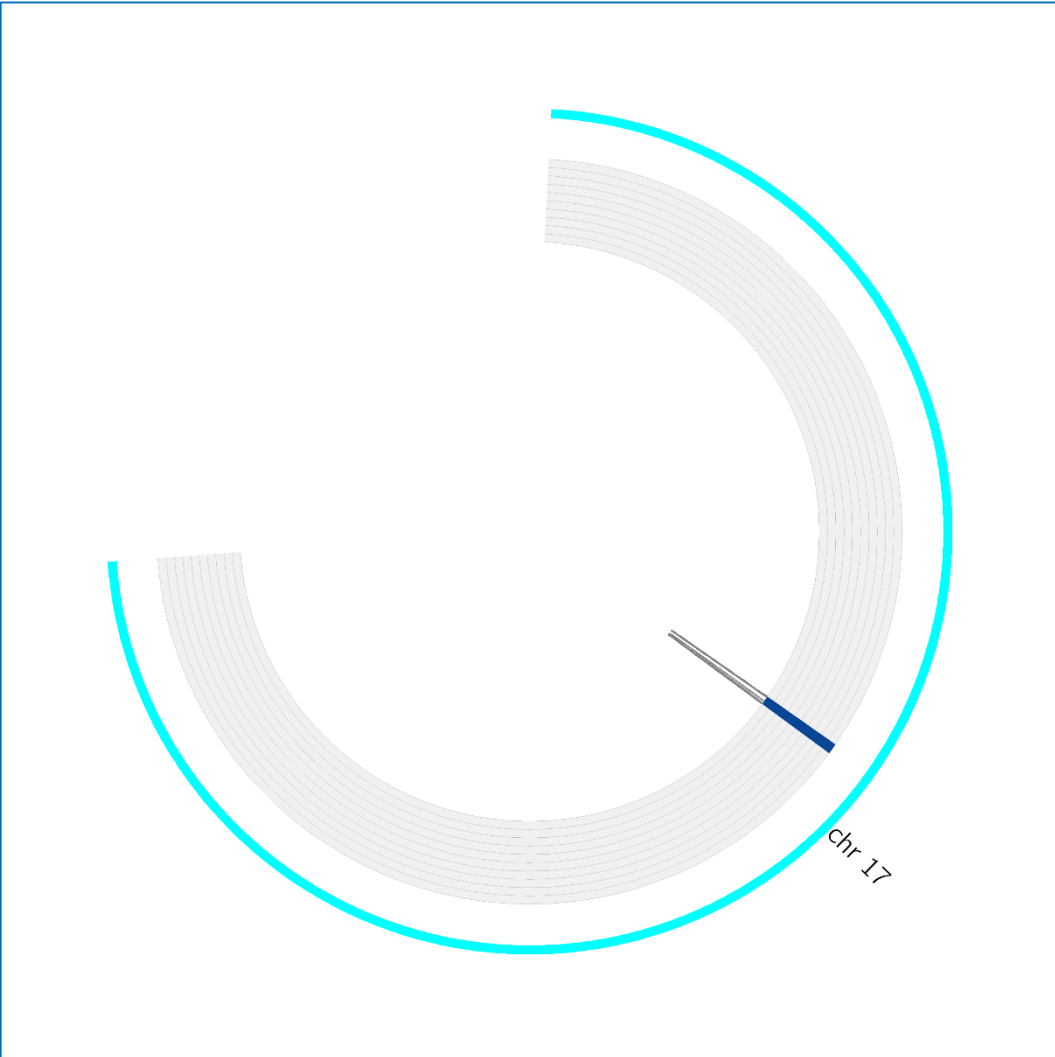

FAST – ERBB2 amplicon

# MCF7

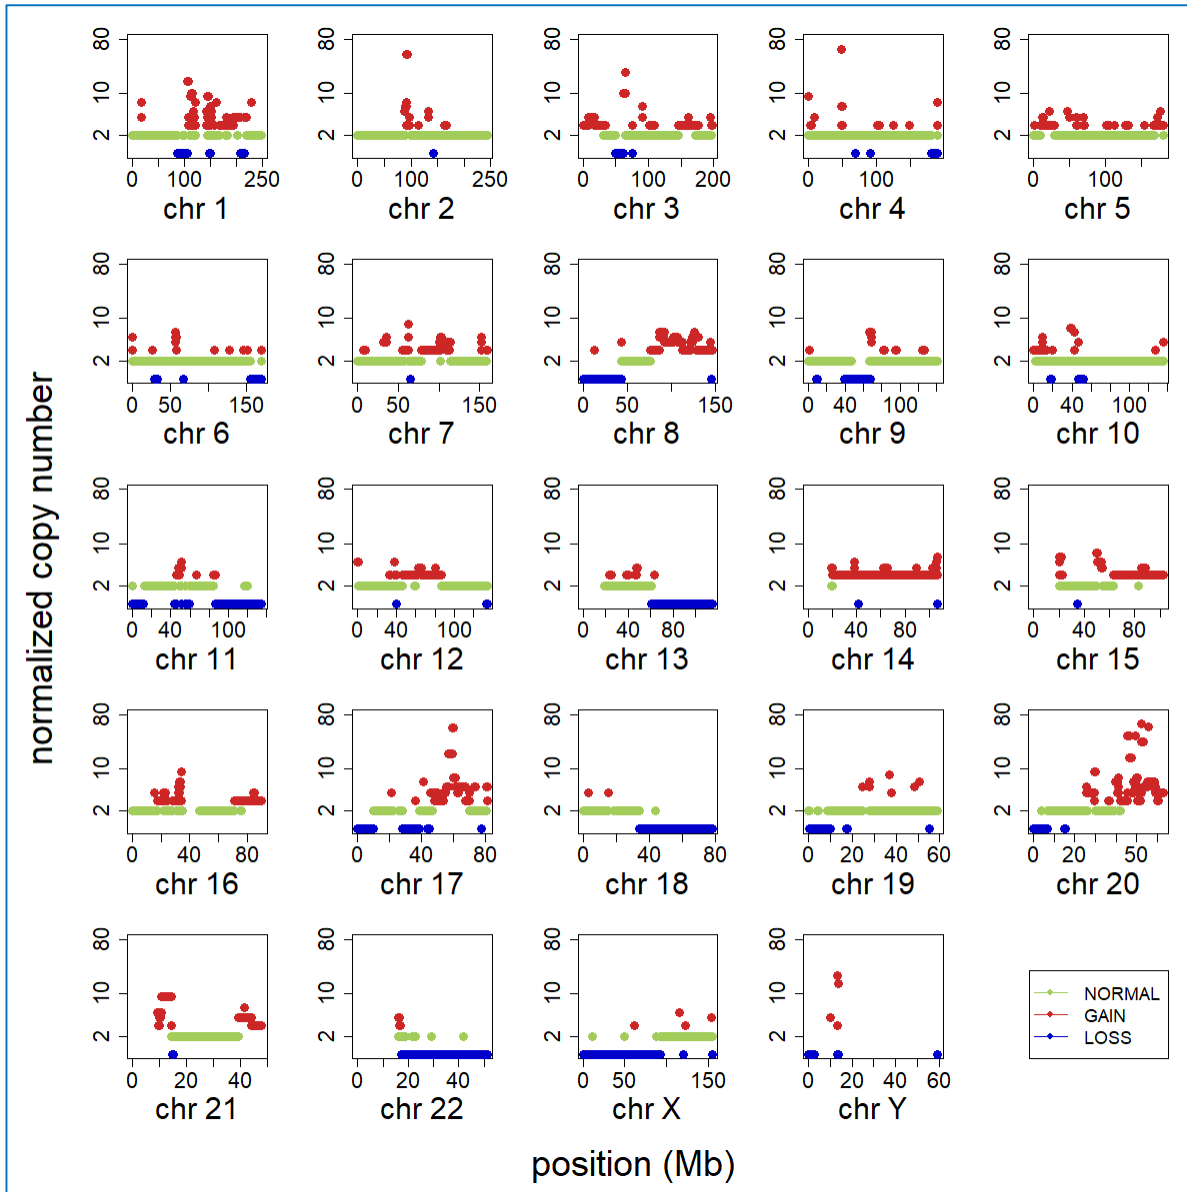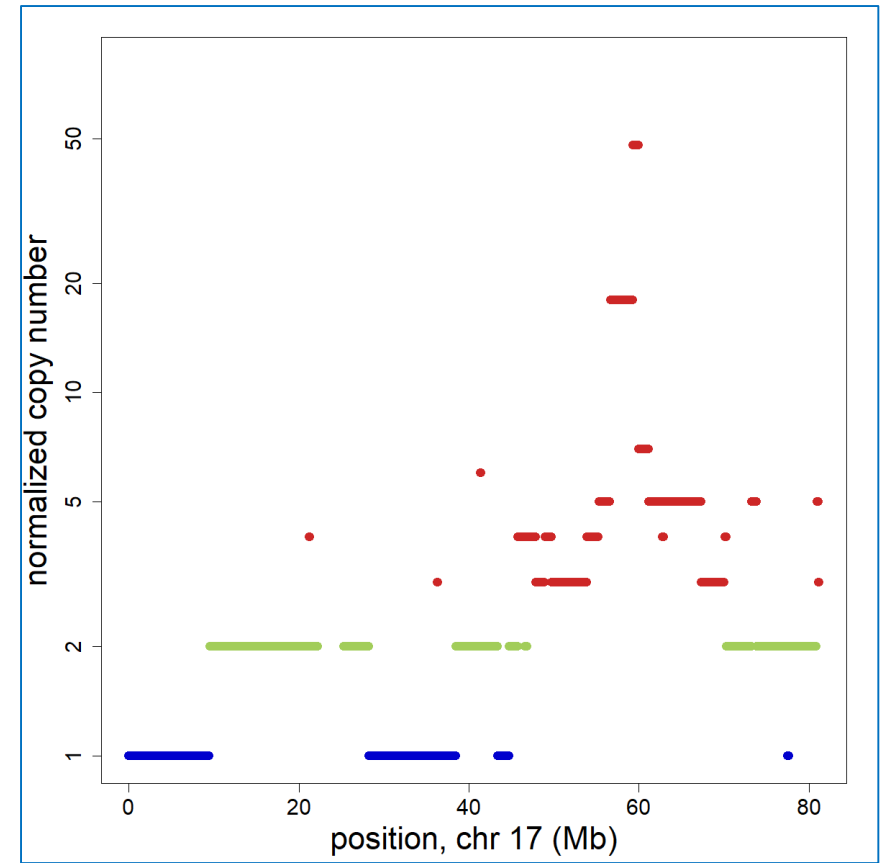

Control-FREEC

# MCF7

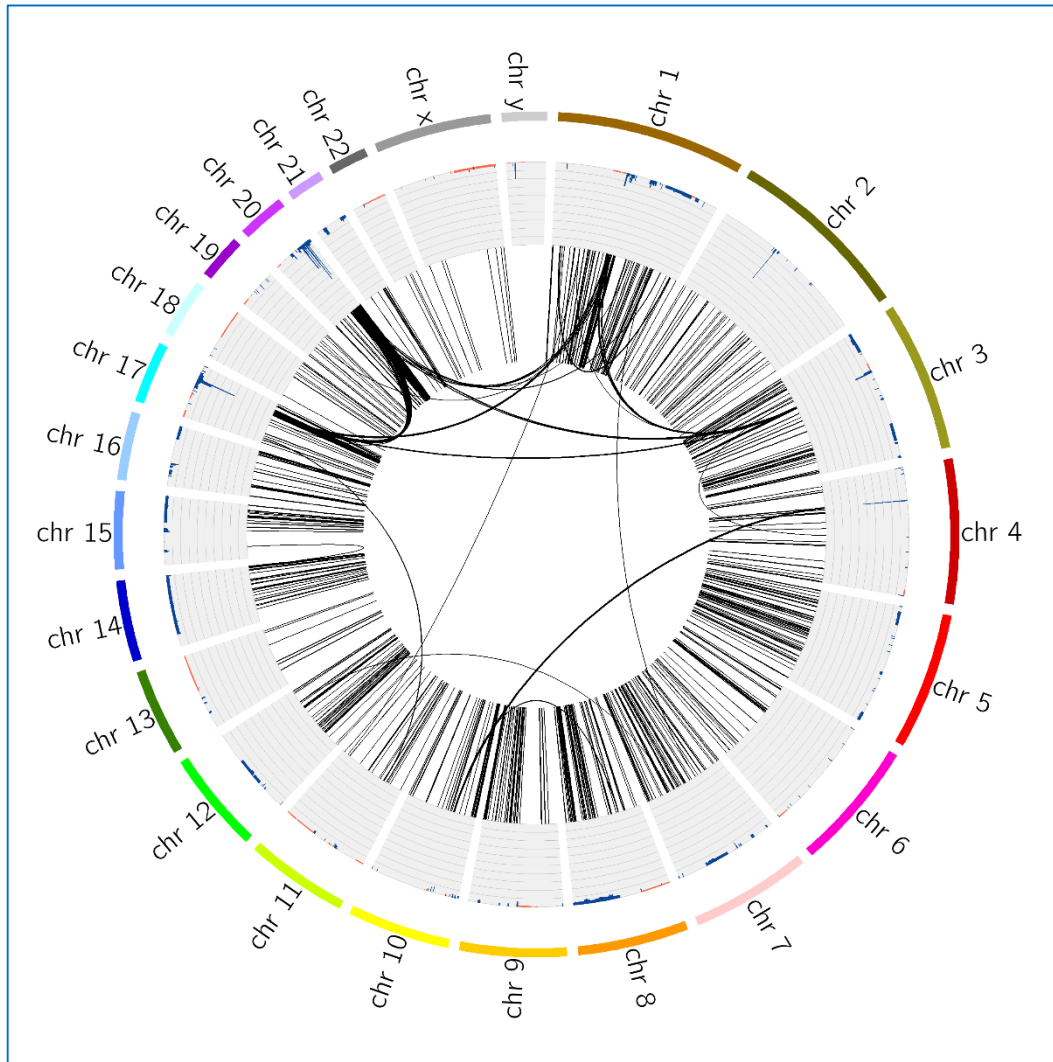

BreakDancer + Control-FREEC

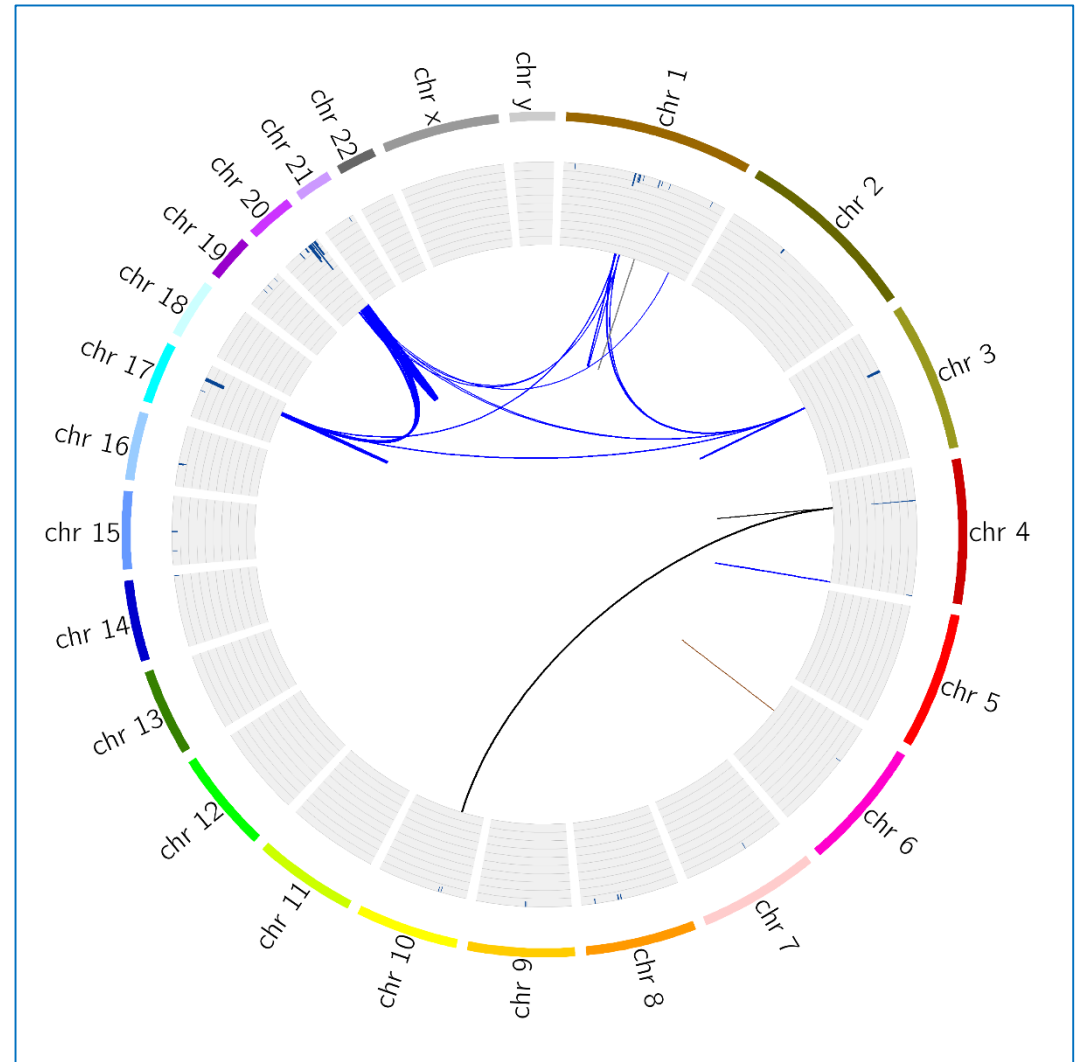

FAST - Whole Genome

MCF7

No FAST data for this sample

FAST – ERBB2 amplicon

# MDA361

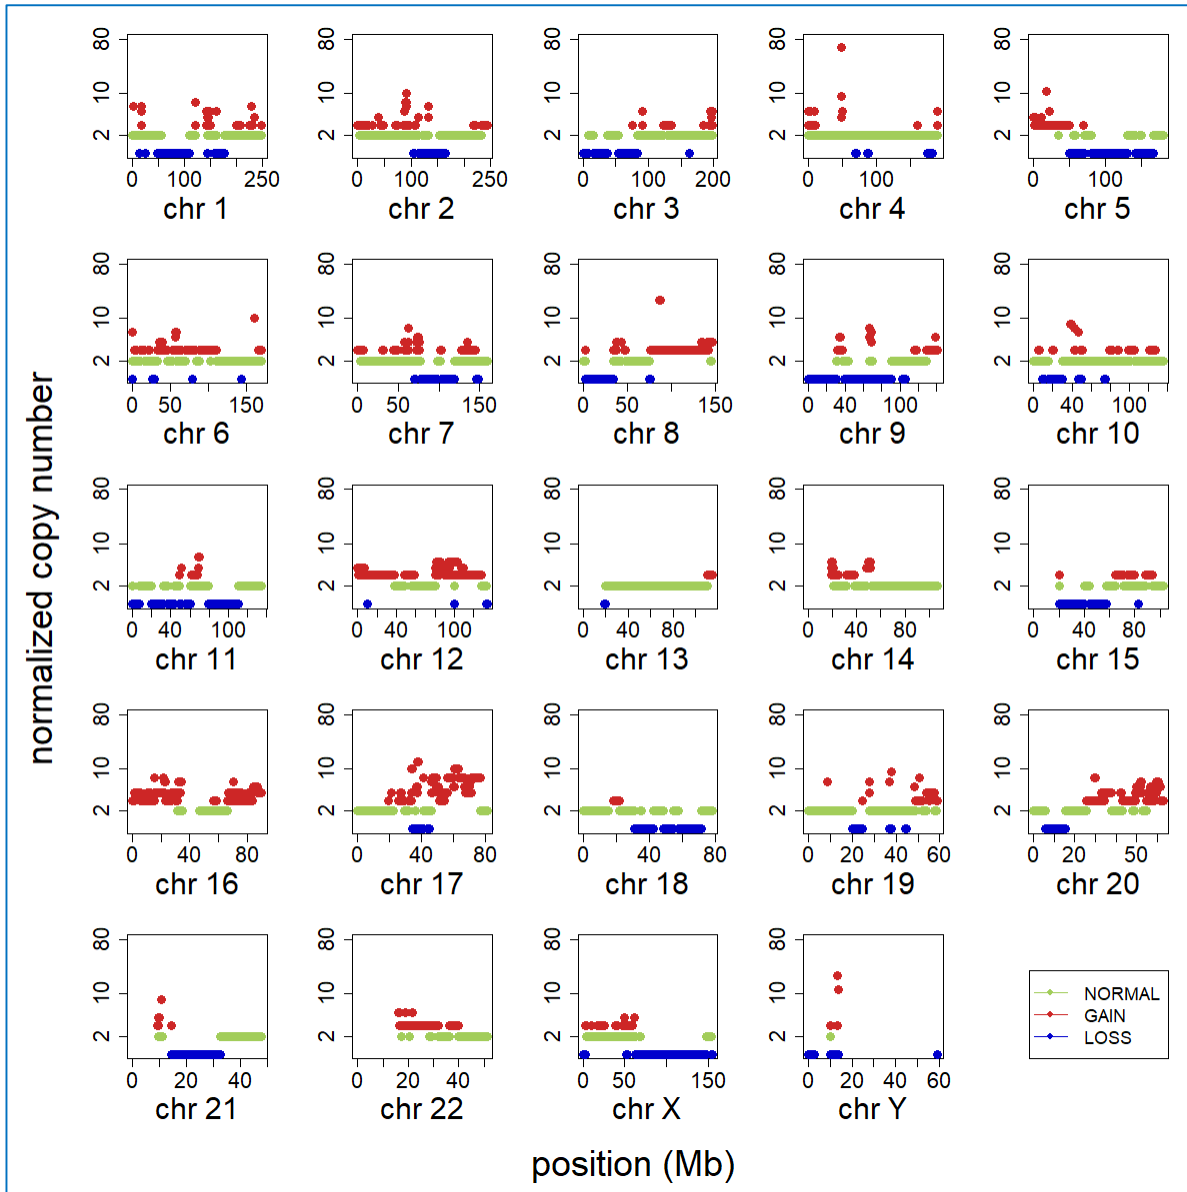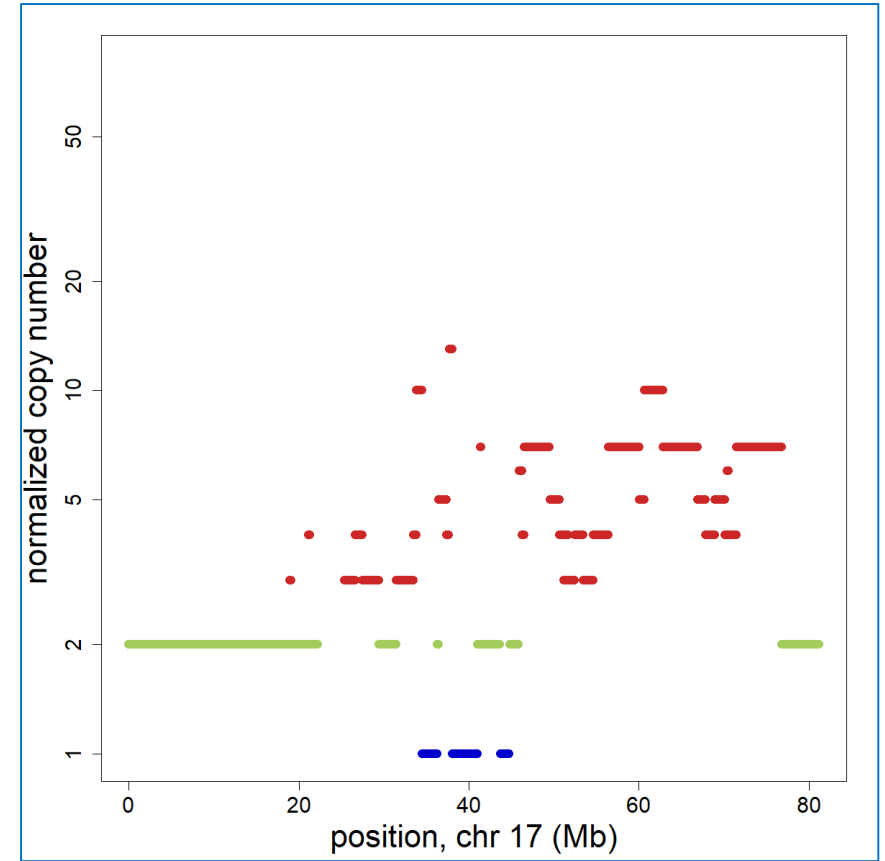

Control-FREEC

# MDA361

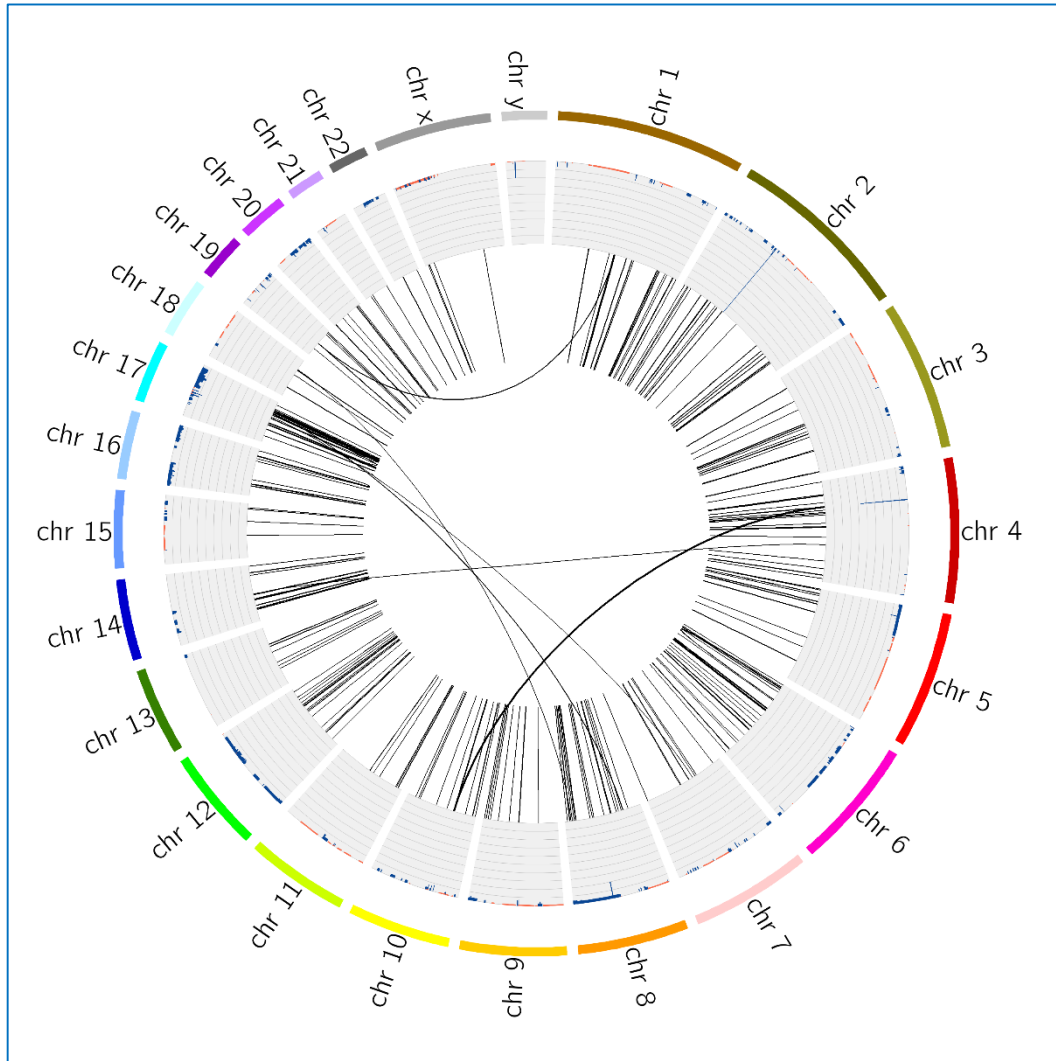

BreakDancer + Control-FREEC

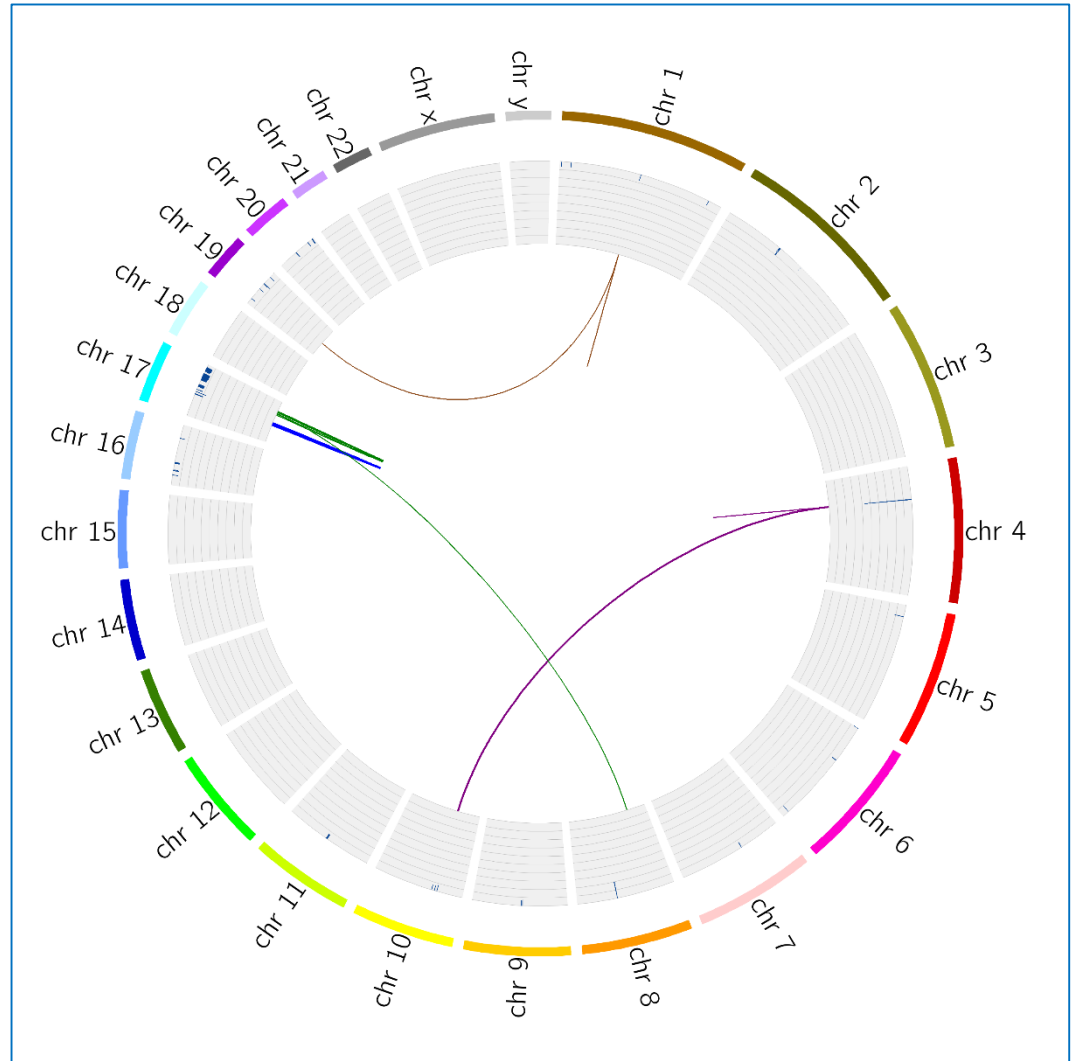

FAST - Whole Genome

MDA361

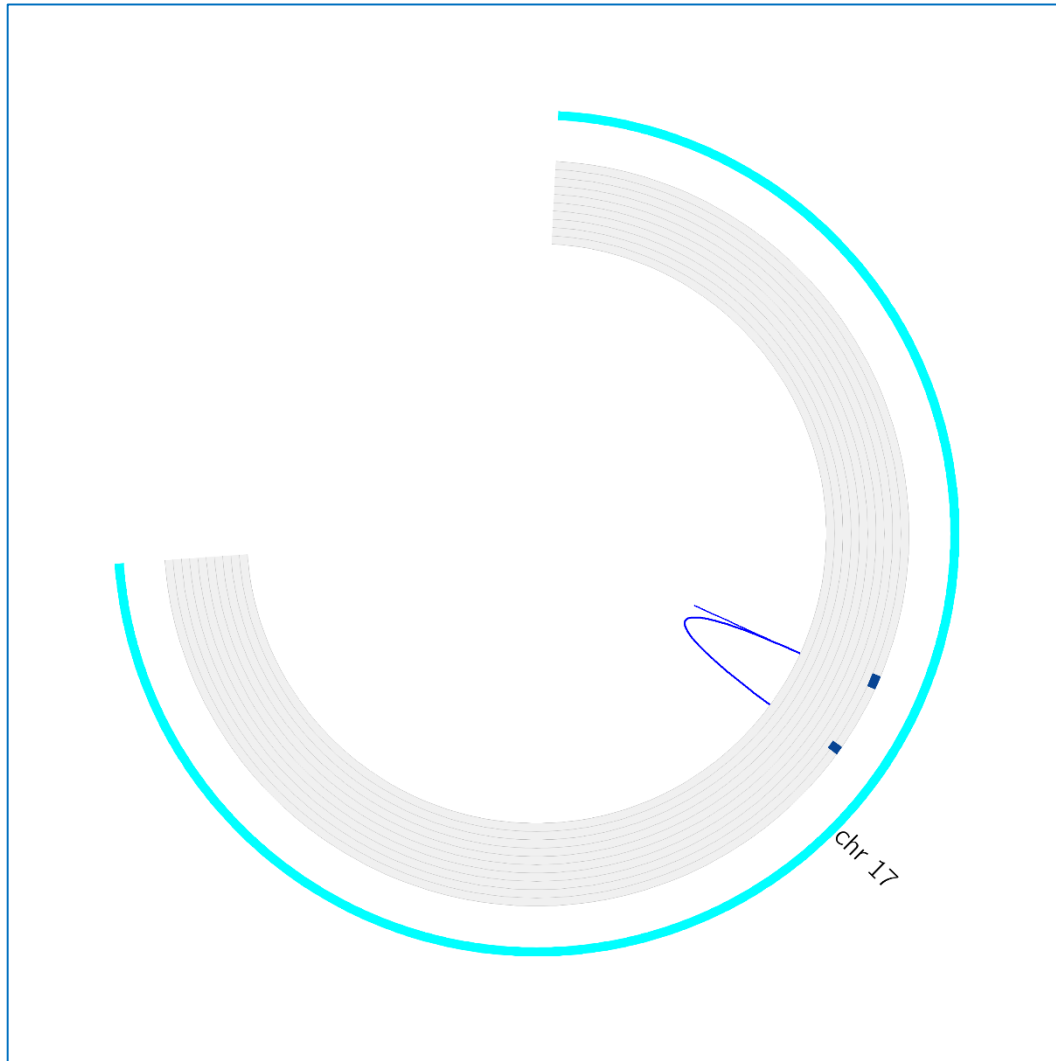

FAST – ERBB2 amplicon

# SKBR3

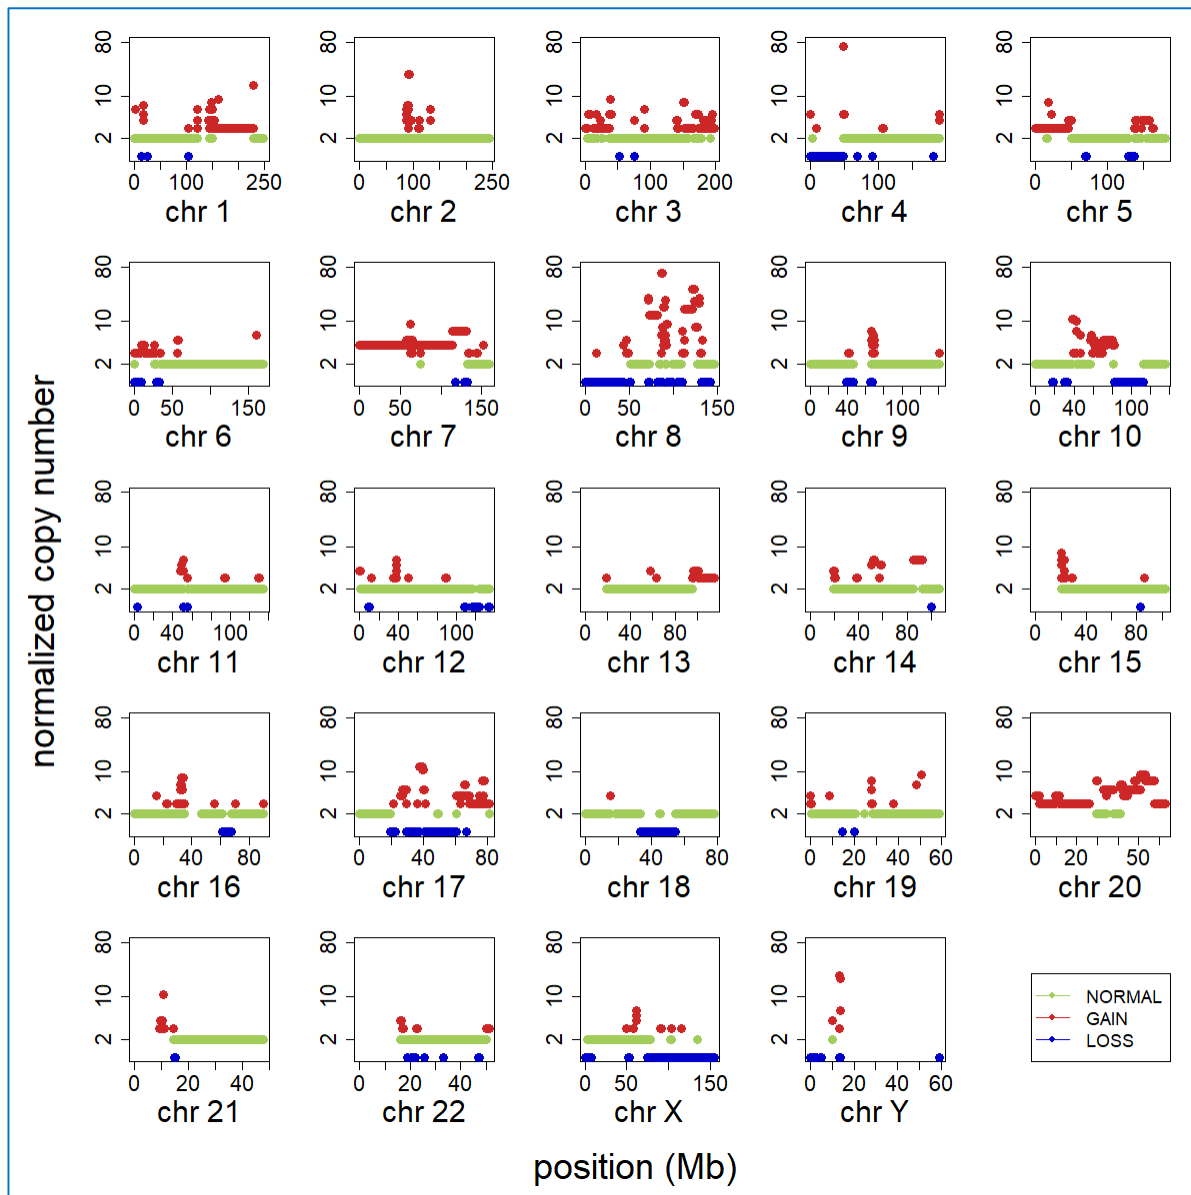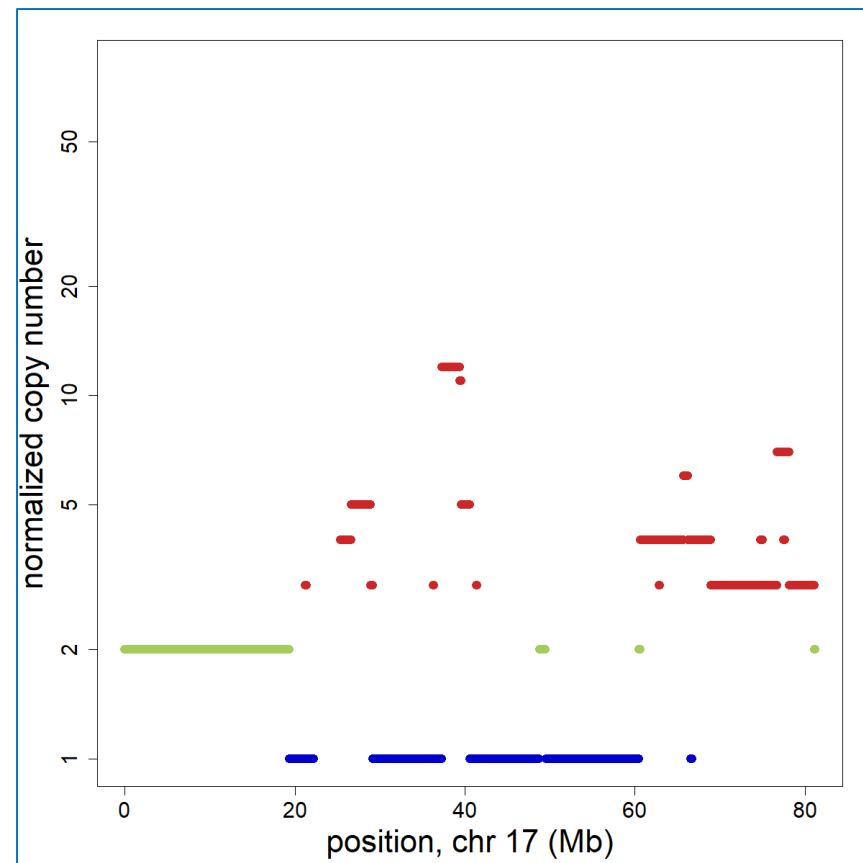

Control-FREEC



# SKBR3

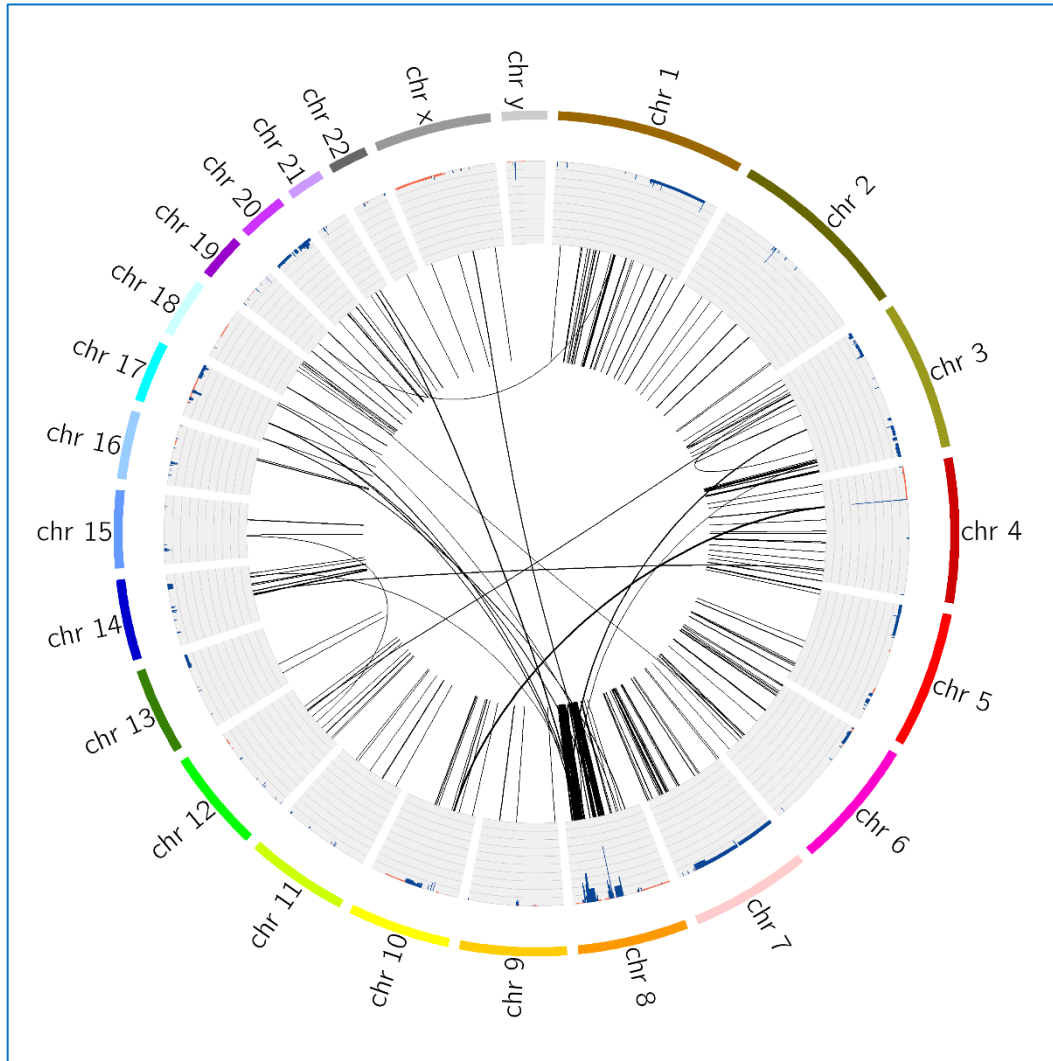

BreakDancer + Control-FREEC

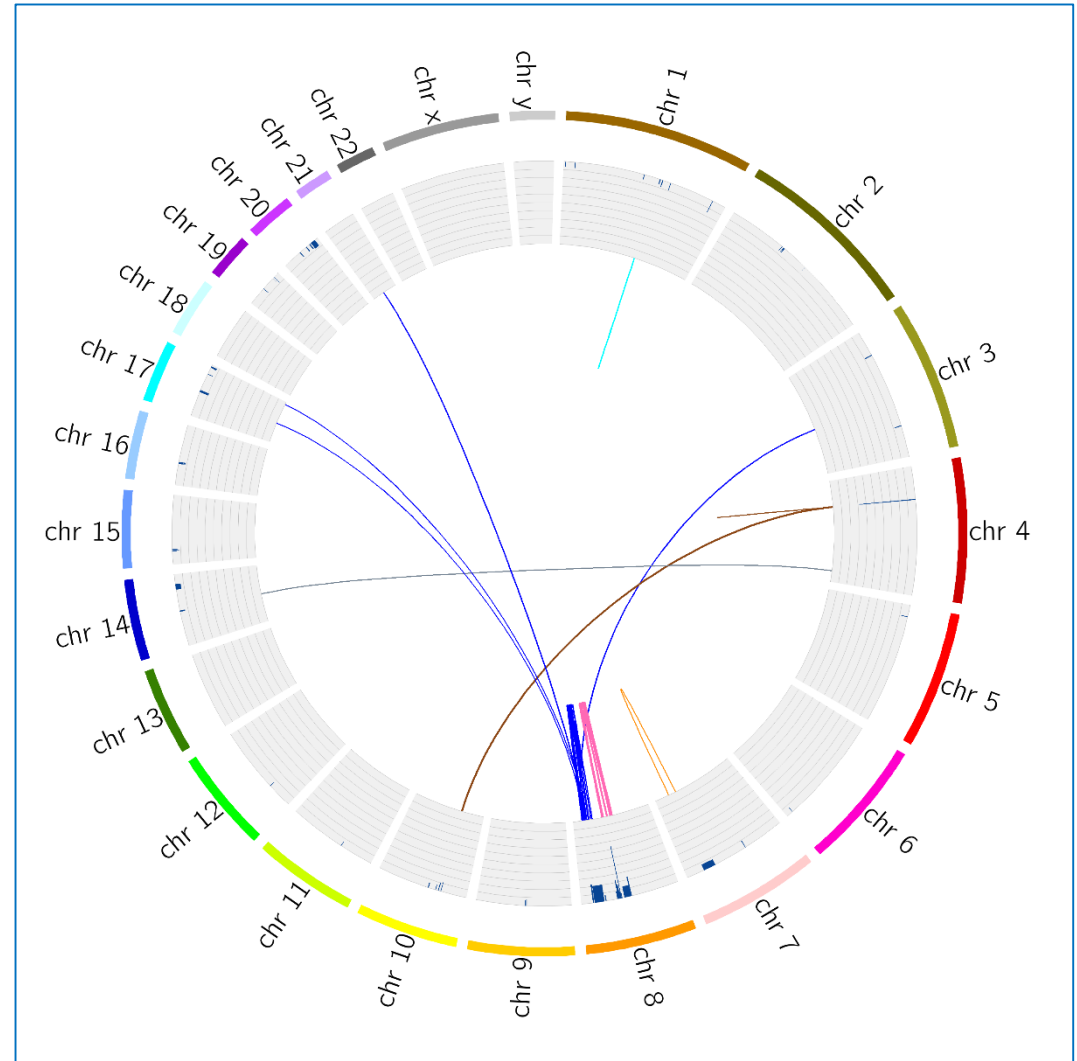

FAST – Whole Genome

# SKBR3

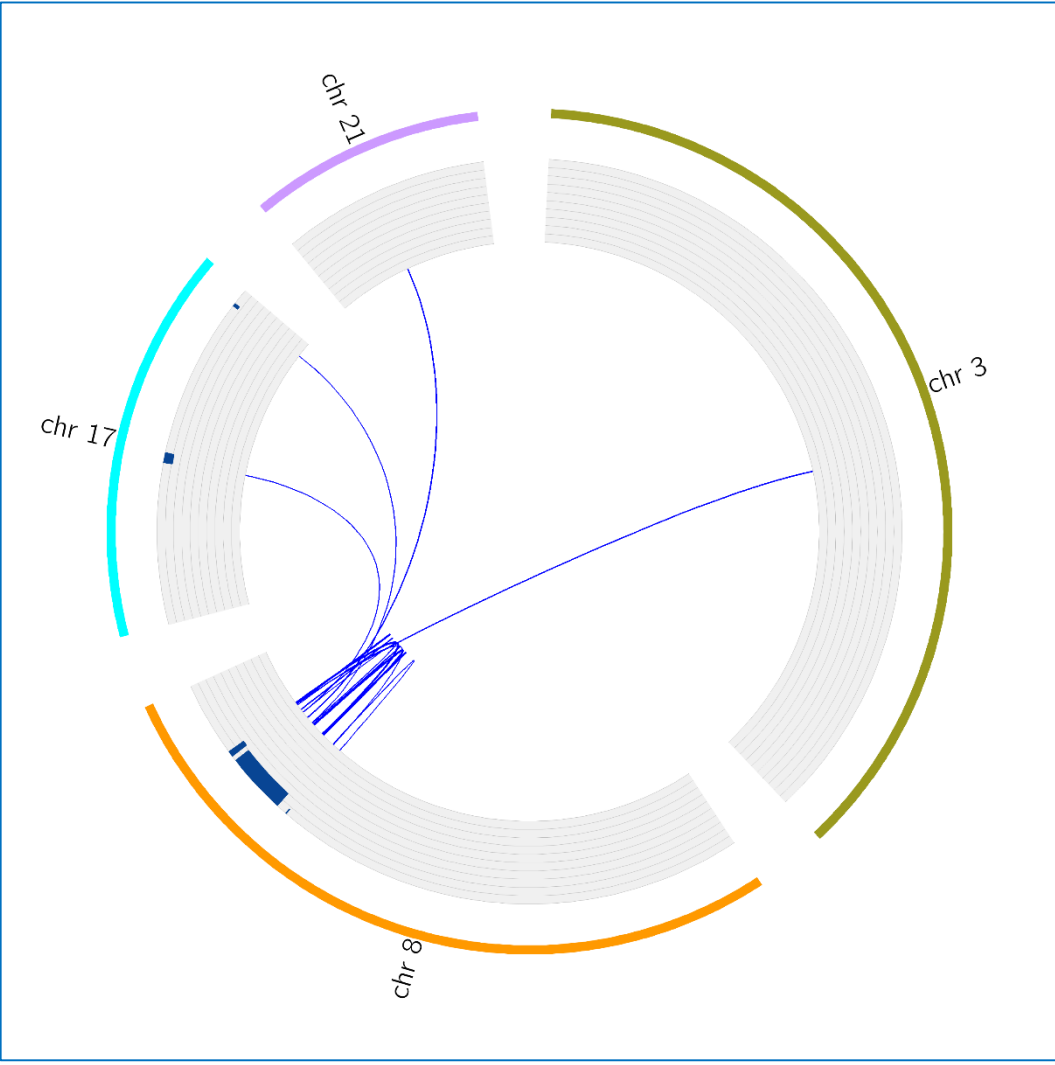

FAST – ERBB2 amplicon

# ZR-75-30

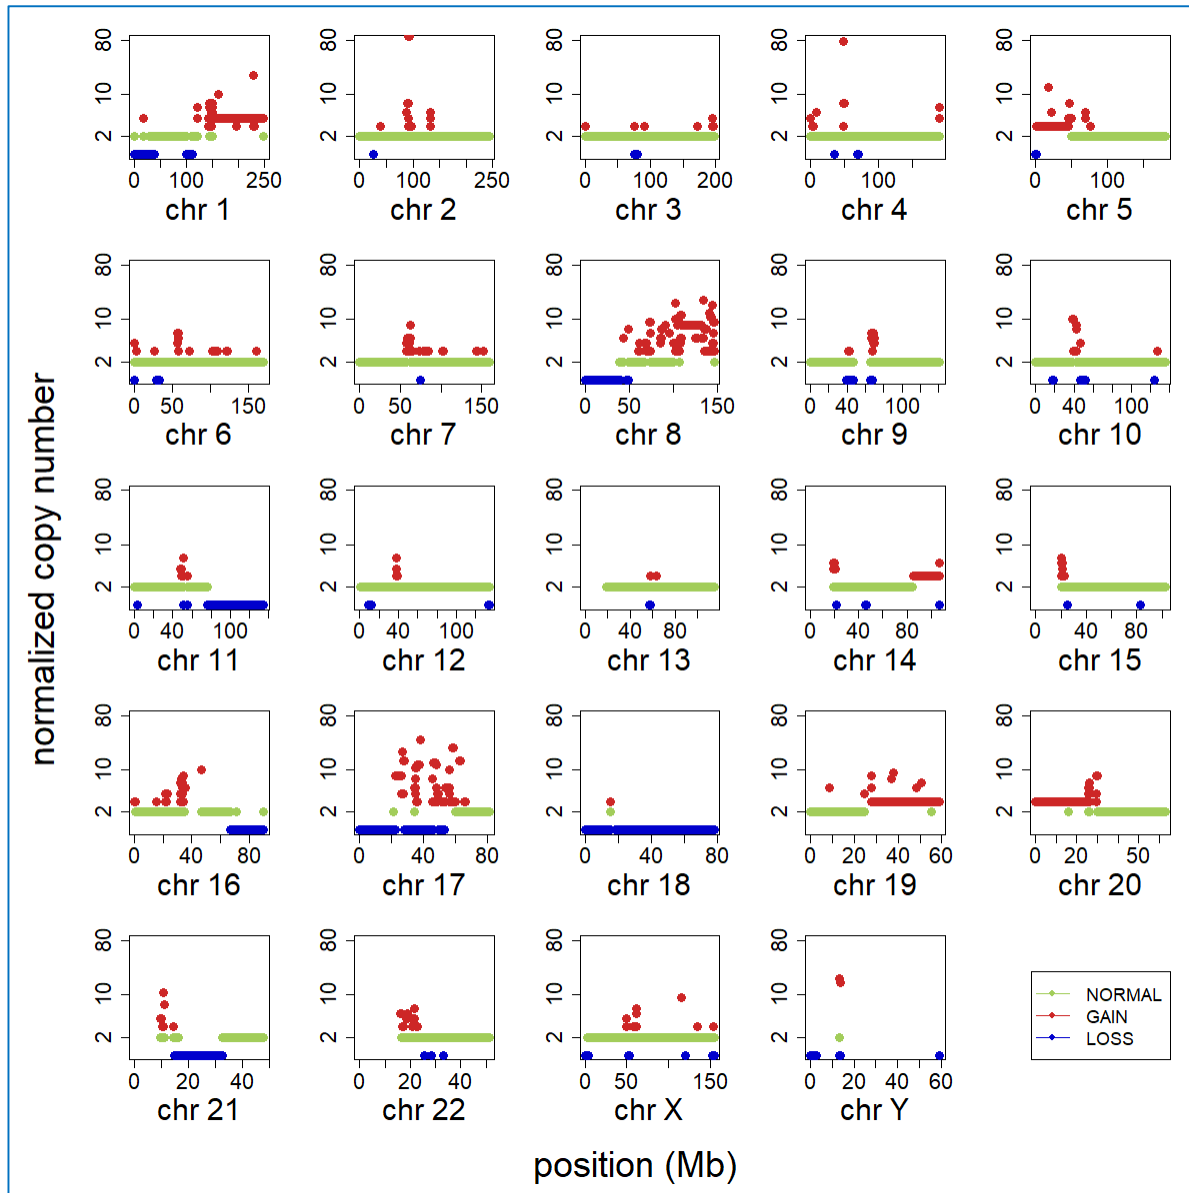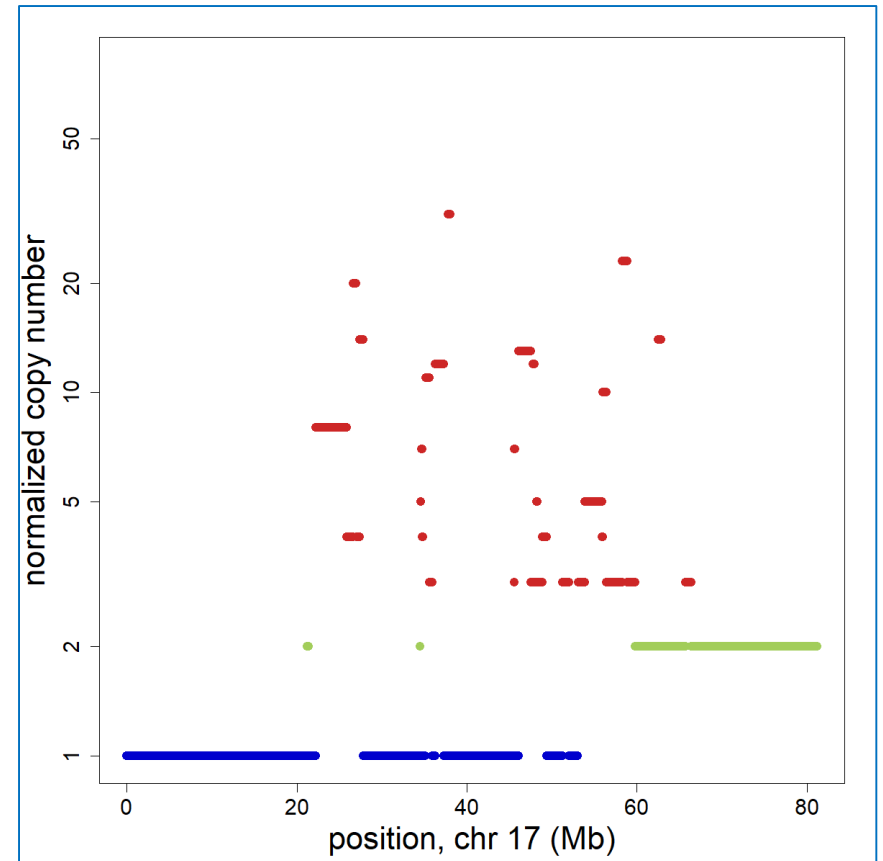

Control-FREEC

ZR-75-30

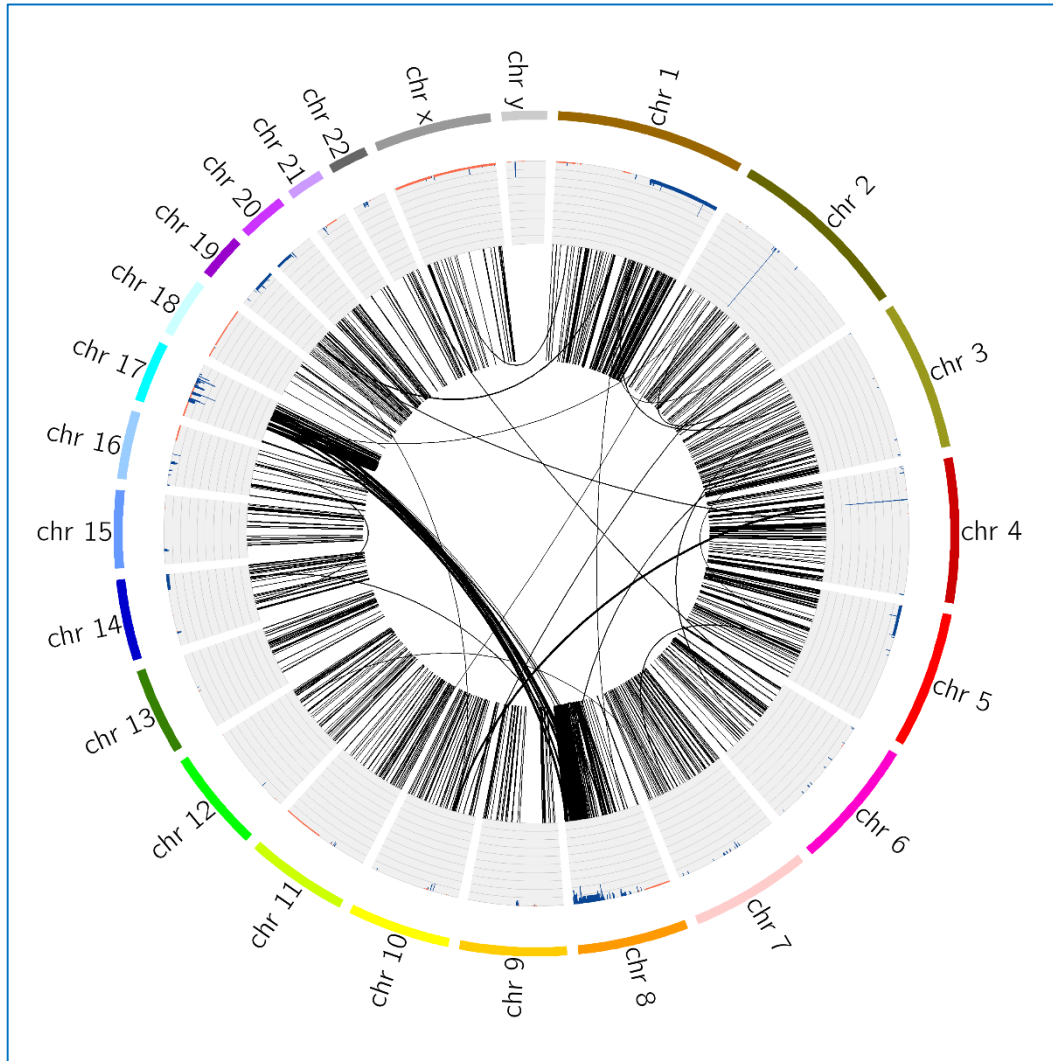

BreakDancer + Control-FREEC

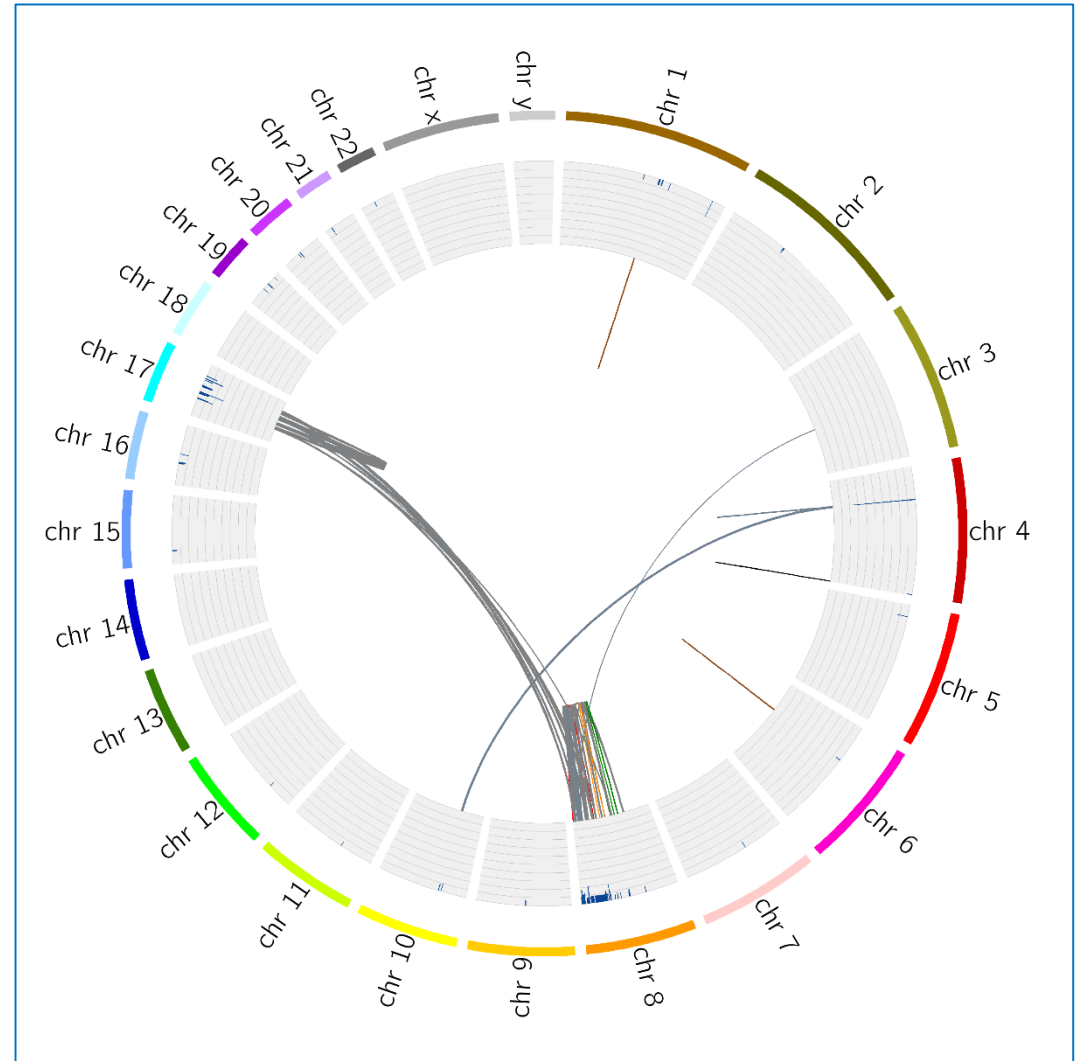

FAST - Whole Genome

ZR-75-30

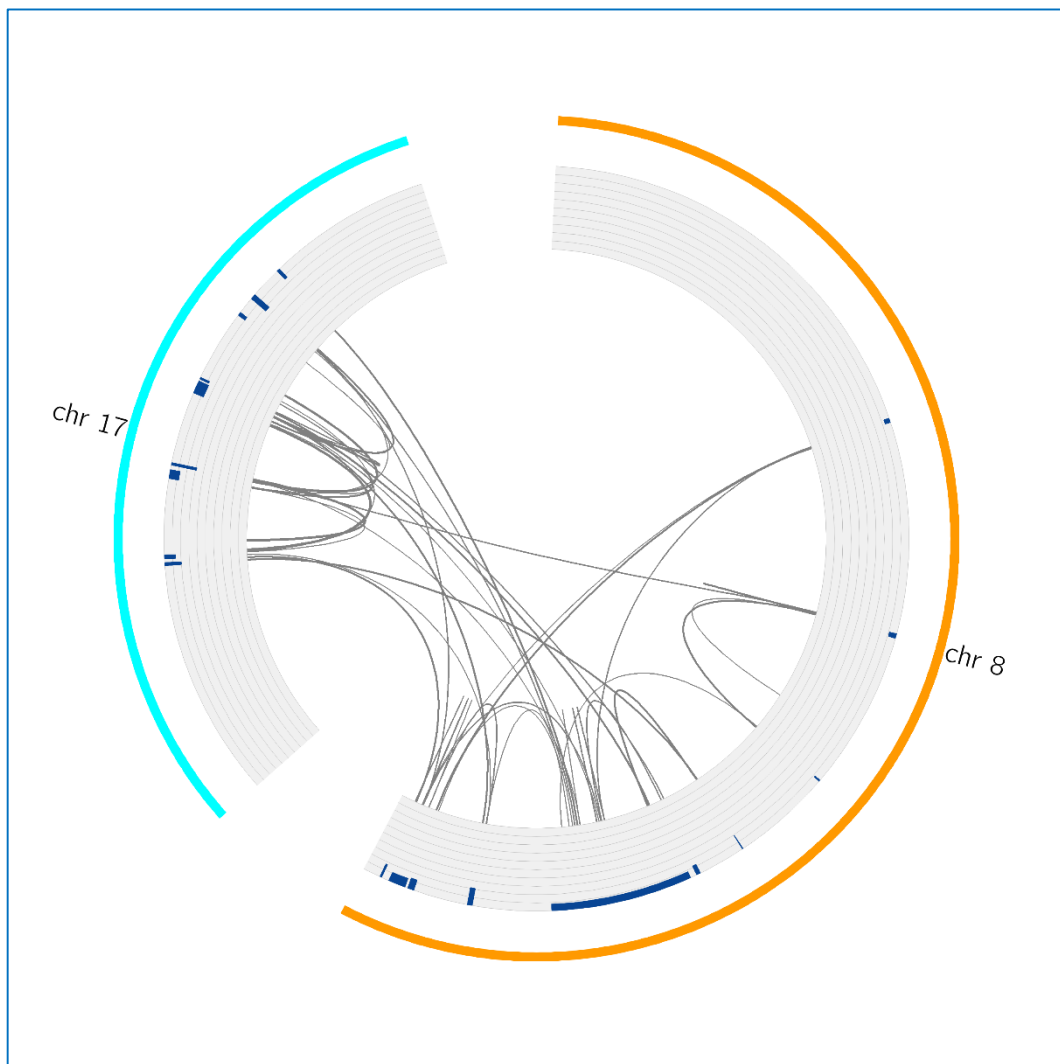

FAST – ERBB2 amplicon
